# Supplementary material for: Disease-modifying effects of natural Δ9-tetrahydrocannabinol in endometriosis-associated pain
Source: eLife. 2020 Jan 14;9:e50356. doi: 10.7554/eLife.50356 (PMC6977967; doi:10.7554/eLife.50356)
Supplement: Figure 1—source data 1. [file elife-50356-fig1-data1.xlsx]

## Sheet: Figure 1
Figure 1a: Pelvic mechanical sensitivity (AUC)												Figure 1b: Mechanical sensitivity (AUC) - Pelvic area											Figure 1b: Mechanical sensitivity (AUC) - Hind paw												Figure 1c: Nocifensive behavior (s)													Figure 1d: Anxiety-like behavior: % of time in open arms
																																			Raw Data	Nocifensive behavior
Raw Data	Mechanical sensitivity (a.u.)											Raw Data	Mechanical sensitivity (a.u.)										Raw Data	Mechanical sensitivity (a.u.)												Sham	Endo
	Day -1	Day 7	Day 14	Day 21	Day 28								Day -2	Day 14										Day -4	Day 16											0	3.66											Raw Data	Sham
Sham	7.7	11.72	9.45	7.49	8.08							Sham	6.535	7.675									Sham	1.95	4.97											2.22	0.292												Time in open arms
Sham	4.94	8.9	4.35	3.88	2.35							Sham	5.555	5.72									Sham	4.065	1.955											1.39	3.37												30.25
Sham	5.99	10.82	7.53	4.74	5.02							Sham	6.07	7.68									Sham	1.99	1.17											0	2.04												7.56
Sham	4.93	10.9	9.29	10	9.96							Sham	6.3	6.5									Sham	1.99	2.735											2.23	2.76												60.65
Sham	5.05	12.03	10.35	9.53	7.97							Sham	7.905	7.32									Sham	5.475	3.405											1.87	1.69												48.27
Sham	7.84	12.62	7.8	5.29	8.15							Sham	5.715	6.11									Sham	1.795	1.56											1.95	5.67												34
Sham	6.65	9.41	6	2.98	4.78							Sham	6.535	7.085									Sham	3.405	1.405											0													30.5
Sham	3.99	7.81	11.13	10.78	8.51							Sham	5.755	5.72									Sham	3.095	2.385										Mean	1.2075	2.78314												27.1
Sham	8.51	15.05	14.96	10.24	11.25							Mean	6.0175	12.7956									Mean	2.64687	2.22812										SD	1.03291	1.70298												29.4
Sham	4.58	12.02	6.87	3.53	4.47							SD	1.60426	2.84535									SD	0.822578	1.31986										SEM	0.36519	0.643665												40.31
Mean	6.018	11.128	8.773	6.846	7.054							SEM	0.567192	1.00598									SEM	0.290825	0.466643										CI	-0.858324	-0.62281											Mean	34.2267
SD	1.57136	2.07202	2.9891	3.09403	2.77643							CI	2.80898	7.10492									CI	1.00172	-0.411604											3.27332	6.1891											SD	14.7791
SEM	0.496908	0.65523	0.945237	0.978418	0.877984								9.22602	18.4863										4.29203	4.86785																							SEM	4.92635
CI	2.87528	6.98396	2.79479	0.657938	1.50114								Mechanical sensitivity (a.u.)											Mechanical sensitivity (a.u.)																								CI	4.66854
	9.16072	15.272	14.7512	13.0341	12.6069								Day -2	Day 14										Day -4	Day 16																								63.7848
	Mechanical sensitivity (a.u.)											Endo	4.93	14.01									Endo	2.615	3.565
	Day -1	Day 7	Day 14	Day 21	Day 28							Endo	5.515	9.47									Endo	2.34	0.39
Endo	4.35	8.46	12.05	12.72	13.76							Endo	6.38	12.065									Endo	2.77	1.6
Endo	2.43	9.48	8.43	6.94	6.74							Endo	6.38	12.065									Endo	2.77	1.6
Endo	9.52	11.25	10.98	12.97	10.81							Endo	6.34	14.405									Endo	2.97	4.06
Endo	15.04	18.18	16.49	18.89	15.51							Endo	4.185	10.455									Endo	1.17	1.17
Endo	3.72	13.49	12.82	15.28	14.98							Endo	4.965	11.36									Endo	2.39	1.92
Endo	5.83	15.99	15	17.48	14.02							Endo	9.445	18.535									Endo	4.15	3.52
Endo	8.42	11.13	8.67	7.71	6.75							Mean	6.29625	6.72625									Mean	2.97062	2.44813
Endo	2.82	13.59	14.47	9.95	10.63							SD	0.749623	0.823498									SD	1.31044	1.26012
Endo	5.21	13.9	17.21	17.88	18.42							SEM	0.265032	0.29115									SEM	0.46331	0.445521
Endo	7.67	9.91	10.42	8.07	7.12							CI	4.797	5.07925									CI	0.34975	-0.0721241
Mean	6.501	12.538	12.654	12.789	11.874								7.7955	8.37325										5.5915	4.96837
SD	3.82504	3.0577	3.09432	4.49351	4.10655
SEM	1.20958	0.96693	0.97851	1.42097	1.2986
CI	-1.14908	6.4226	6.46536	3.80198	3.6609
	14.1511	18.6534	18.8426	21.776	20.0871
Statistics												Statistics											Statistics												Statistics													Statistics
Within-Subjects Factors												Within-Subjects Factors											Within-Subjects Factors												Group Statistics													Group Statistics
Measure:Mechanical sensitivity												Measure:Mechanical sensitivity											Measure:Mechanicalsensitivitypaw													Surgery	N	Mean	Std. Deviation	Std. Error Mean									Surgery
Time	Dependent Variable											Time	Dependent Variable										Time	Dependent Variable											Day14	Sham	8	6.7275	0.824634	0.291552								% time open arms	Sham
1	Day -1											1	Basal										1	Basalpaw												Endo	8	12.7988	2.84624	1.0063									Endo
2	Day 7											2	Day14										2	Day16paw
3	Day 14																																		Independent Samples Test													Independent Samples Test
4	Day 21																																				Levene's Test for Equality of Variances		t-test for Equality of Means
5	Day 28																																				F	Sig.	t	df	Sig. (2-tailed)	Mean Difference	Std. Error Difference	95% Confidence Interval of the Difference
																																												Lower	Upper
Between-Subjects Factors												Between-Subjects Factors											Between-Subjects Factors												Day14	Equal variances assumed	5.49828	0.0342989	-5.79493	14	4.6442e-05	-6.07125	1.04768	-8.31831	-3.82419			% time open arms	Equal variances assumed
		N												N											N											Equal variances not assumed			-5.79493	8.16696	0.000377165	-6.07125	1.04768	-8.47864	-3.66386				Equal variances not assumed
Surgery	Endo	10										Surgery	Endo	8									Surgery	Endo	8
	Sham	10											Sham	8										Sham	8
Descriptive Statistics												Descriptive Statistics											Descriptive Statistics
	Surgery	Mean	Std. Deviation	N									Surgery	Mean	Std. Deviation	N								Surgery	Mean	Std. Deviation	N
Day -1	Endo	6.501	3.82504	10								Day -2	Endo	6.02	1.60428	8							Basalpaw	Endo	2.6475	0.822553	8
	Sham	6.018	1.57136	10									Sham	6.3	0.749838	8								Sham	2.97375	1.31206	8
	Total	6.2595	2.85682	20									Total	6.16	1.21834	16								Total	2.81062	1.07121	16
Day 7	Endo	12.538	3.0577	10								Day 14	Endo	12.7987	2.84624	8							Day16paw	Endo	2.22875	1.32059	8
	Sham	11.128	2.07202	10									Sham	6.7275	0.824634	8								Sham	2.45125	1.25993	8
	Total	11.833	2.64302	20									Total	9.76312	3.73192	16								Total	2.34	1.25213	16
Day 14	Endo	12.654	3.09432	10
	Sham	8.773	2.9891	10
	Total	10.7135	3.56811	20
Day 21	Endo	12.789	4.49351	10
	Sham	6.846	3.09403	10
	Total	9.8175	4.83669	20
Day 28	Endo	11.874	4.10655	10
	Sham	7.054	2.77643	10
	Total	9.464	4.21347	20
Multivariate Testsc												Multivariate Testsc											Multivariate Testsc
Effect		Value	F	Hypothesis df	Error df	Sig.	Partial Eta Squared	Noncent. Parameter	Observed Powerb			Effect		Value	F	Hypothesis df	Error df	Sig.	Partial Eta Squared	Noncent. Parameter	Observed Powerb		Effect		Value	F	Hypothesis df	Error df	Sig.	Partial Eta Squared	Noncent. Parameter	Observed Powerb
Time	Pillai's Trace	0.850614	21.353a	4	15	4.73535e-06	0.850614	85.4112	1			Time	Pillai's Trace	0.887287	110.209a	1	14	5.0996e-08	0.887287	110.209	1		Time	Pillai's Trace	0.107847	1.692a	1	14	0.214294	0.107847	1.69237	0.22823
	Wilks' Lambda	0.149386	21.353a	4	15	4.73535e-06	0.850614	85.4112	1				Wilks' Lambda	0.112713	110.209a	1	14	5.0996e-08	0.887287	110.209	1			Wilks' Lambda	0.892153	1.692a	1	14	0.214294	0.107847	1.69237	0.22823
	Hotelling's Trace	5.69408	21.353a	4	15	4.73535e-06	0.850614	85.4112	1				Hotelling's Trace	7.87205	110.209a	1	14	5.0996e-08	0.887287	110.209	1			Hotelling's Trace	0.120884	1.692a	1	14	0.214294	0.107847	1.69237	0.22823
	Roy's Largest Root	5.69408	21.353a	4	15	4.73535e-06	0.850614	85.4112	1				Roy's Largest Root	7.87205	110.209a	1	14	5.0996e-08	0.887287	110.209	1			Roy's Largest Root	0.120884	1.692a	1	14	0.214294	0.107847	1.69237	0.22823
Time * Surgery	Pillai's Trace	0.38205	2.318a	4	15	0.104554	0.38205	9.27381	0.529124			Time * Surgery	Pillai's Trace	0.859449	85.608a	1	14	2.42382e-07	0.859449	85.6083	1		Time * Surgery	Pillai's Trace	0.00146655	.021a	1	14	0.888023	0.00146655	0.0205618	0.0520546
	Wilks' Lambda	0.61795	2.318a	4	15	0.104554	0.38205	9.27381	0.529124				Wilks' Lambda	0.140551	85.608a	1	14	2.42382e-07	0.859449	85.6083	1			Wilks' Lambda	0.998533	.021a	1	14	0.888023	0.00146655	0.0205618	0.0520546
	Hotelling's Trace	0.618254	2.318a	4	15	0.104554	0.38205	9.27381	0.529124				Hotelling's Trace	6.11488	85.608a	1	14	2.42382e-07	0.859449	85.6083	1			Hotelling's Trace	0.0014687	.021a	1	14	0.888023	0.00146655	0.0205618	0.0520546
	Roy's Largest Root	0.618254	2.318a	4	15	0.104554	0.38205	9.27381	0.529124				Roy's Largest Root	6.11488	85.608a	1	14	2.42382e-07	0.859449	85.6083	1			Roy's Largest Root	0.0014687	.021a	1	14	0.888023	0.00146655	0.0205618	0.0520546
a. Exact statistic b. Computed using alpha = .05 c. Design: Intercept + Surgery Within Subjects Design: Time												a. Exact statistic b. Computed using alpha = .05 c. Design: Intercept + Surgery Within Subjects Design: Time											a. Exact statistic b. Computed using alpha = .05 c. Design: Intercept + Surgery Within Subjects Design: Time
Mauchly's Test of Sphericityb												Mauchly's Test of Sphericityb											Mauchly's Test of Sphericityb
Measure:Mechanicalsensitivity												Measure:Mechanicalsensitivity											Measure:Mechanicalsensitivitypaw
Within Subjects Effect	Mauchly's W	Approx. Chi-Square	df	Sig.	Epsilona							Within Subjects Effect	Mauchly's W	Approx. Chi-Square	df	Sig.	Epsilona						Within Subjects Effect	Mauchly's W	Approx. Chi-Square	df	Sig.	Epsilona
					Greenhouse-Geisser	Huynh-Feldt	Lower-bound										Greenhouse-Geisser	Huynh-Feldt	Lower-bound									Greenhouse-Geisser	Huynh-Feldt	Lower-bound
Time	0.138998	32.3949	9	0.000183434	0.485314	0.573288	0.25					Time	1	0	0	.	1	1	1				Time	1	0	0	.	1	1	1
Tests the null hypothesis that the error covariance matrix of the orthonormalized transformed dependent variables is proportional to an identity matrix.												Tests the null hypothesis that the error covariance matrix of the orthonormalized transformed dependent variables is proportional to an identity matrix.											Tests the null hypothesis that the error covariance matrix of the orthonormalized transformed dependent variables is proportional to an identity matrix.
a. May be used to adjust the degrees of freedom for the averaged tests of significance. Corrected tests are displayed in the Tests of Within-Subjects Effects table. b. Design: Intercept + Surgery Within Subjects Design: Time												a. May be used to adjust the degrees of freedom for the averaged tests of significance. Corrected tests are displayed in the Tests of Within-Subjects Effects table. b. Design: Intercept + Surgery Within Subjects Design: Time											a. May be used to adjust the degrees of freedom for the averaged tests of significance. Corrected tests are displayed in the Tests of Within-Subjects Effects table. b. Design: Intercept + Surgery Within Subjects Design: Time
Tests of Within-Subjects Effects												Tests of Within-Subjects Effects											Tests of Within-Subjects Effects
Measure:Mechanicalsensitivity												Measure:Mechanicalsensitivity											Measure:Mechanicalsensitivitypaw
Source		Type III Sum of Squares	df	Mean Square	F	Sig.	Partial Eta Squared	Noncent. Parameter	Observed Powera			Source		Type III Sum of Squares	df	Mean Square	F	Sig.	Partial Eta Squared	Noncent. Parameter	Observed Powera		Source		Type III Sum of Squares	df	Mean Square	F	Sig.	Partial Eta Squared	Noncent. Parameter	Observed Powera
Time	Sphericity Assumed	348.988	4	87.2469	19.3005	7.96099e-11	0.517432	77.2018	1			Time	Sphericity Assumed	103.86	1	103.86	110.209	5.0996e-08	0.887287	110.209	1		Time	Sphericity Assumed	1.7719	1	1.7719	1.69237	0.214294	0.107847	1.69237	0.22823
	Greenhouse-Geisser	348.988	1.94126	179.774	19.3005	2.72035e-06	0.517432	37.4671	0.999811				Greenhouse-Geisser	103.86	1	103.86	110.209	5.0996e-08	0.887287	110.209	1			Greenhouse-Geisser	1.7719	1	1.7719	1.69237	0.214294	0.107847	1.69237	0.22823
	Huynh-Feldt	348.988	2.29315	152.187	19.3005	4.50698e-07	0.517432	44.2589	0.999966				Huynh-Feldt	103.86	1	103.86	110.209	5.0996e-08	0.887287	110.209	1			Huynh-Feldt	1.7719	1	1.7719	1.69237	0.214294	0.107847	1.69237	0.22823
	Lower-bound	348.988	1	348.988	19.3005	0.000350677	0.517432	19.3005	0.985691				Lower-bound	103.86	1	103.86	110.209	5.0996e-08	0.887287	110.209	1			Lower-bound	1.7719	1	1.7719	1.69237	0.214294	0.107847	1.69237	0.22823
Time * Surgery	Sphericity Assumed	105.704	4	26.4259	5.84585	0.000393826	0.245152	23.3834	0.977003			Time * Surgery	Sphericity Assumed	80.6768	1	80.6768	85.6083	2.42382e-07	0.859449	85.6083	1		Time * Surgery	Sphericity Assumed	0.0215281	1	0.0215281	0.0205618	0.888023	0.00146655	0.0205618	0.0520546
	Greenhouse-Geisser	105.704	1.94126	54.4511	5.84585	0.00688031	0.245152	11.3483	0.835227				Greenhouse-Geisser	80.6768	1	80.6768	85.6083	2.42382e-07	0.859449	85.6083	1			Greenhouse-Geisser	0.0215281	1	0.0215281	0.0205618	0.888023	0.00146655	0.0205618	0.0520546
	Huynh-Feldt	105.704	2.29315	46.0954	5.84585	0.00418669	0.245152	13.4054	0.880455				Huynh-Feldt	80.6768	1	80.6768	85.6083	2.42382e-07	0.859449	85.6083	1			Huynh-Feldt	0.0215281	1	0.0215281	0.0205618	0.888023	0.00146655	0.0205618	0.0520546
	Lower-bound	105.704	1	105.704	5.84585	0.0264408	0.245152	5.84585	0.6284				Lower-bound	80.6768	1	80.6768	85.6083	2.42382e-07	0.859449	85.6083	1			Lower-bound	0.0215281	1	0.0215281	0.0205618	0.888023	0.00146655	0.0205618	0.0520546
Error(Time)	Sphericity Assumed	325.473	72	4.52046								Error(Time)	Sphericity Assumed	13.1935	14	0.942394							Error(Time)	Sphericity Assumed	14.6579	14	1.04699
	Greenhouse-Geisser	325.473	34.9426	9.3145									Greenhouse-Geisser	13.1935	14	0.942394								Greenhouse-Geisser	14.6579	14	1.04699
	Huynh-Feldt	325.473	41.2767	7.88515									Huynh-Feldt	13.1935	14	0.942394								Huynh-Feldt	14.6579	14	1.04699
	Lower-bound	325.473	18	18.0818									Lower-bound	13.1935	14	0.942394								Lower-bound	14.6579	14	1.04699
a. Computed using alpha = .05												a. Computed using alpha = .05											a. Computed using alpha = .05
Tests of Within-Subjects Contrasts												Tests of Within-Subjects Contrasts											Tests of Within-Subjects Contrasts
Measure:Mechanicalsensitivity												Measure:Mechanicalsensitivity											Measure:Mechanicalsensitivitypaw
Source	Time	Type III Sum of Squares	df	Mean Square	F	Sig.	Partial Eta Squared	Noncent. Parameter	Observed Powera			Source	Time	Type III Sum of Squares	df	Mean Square	F	Sig.	Partial Eta Squared	Noncent. Parameter	Observed Powera		Source	Time	Type III Sum of Squares	df	Mean Square	F	Sig.	Partial Eta Squared	Noncent. Parameter	Observed Powera
Time	Linear	38.6057	1	38.6057	3.45811	0.0793666	0.161156	3.45811	0.420991			Time	Linear	103.86	1	103.86	110.209	5.0996e-08	0.887287	110.209	1		Time	Linear	1.7719	1	1.7719	1.69237	0.214294	0.107847	1.69237	0.22823
	Quadratic	193.241	1	193.241	65.3929	2.10164e-07	0.784154	65.3929	1			Time * Surgery	Linear	80.6768	1	80.6768	85.6083	2.42382e-07	0.859449	85.6083	1		Time * Surgery	Linear	0.0215281	1	0.0215281	0.0205618	0.888023	0.00146655	0.0205618	0.0520546
	Cubic	104.705	1	104.705	40.4397	5.44604e-06	0.69199	40.4397	0.999973			Error(Time)	Linear	13.1935	14	0.942394							Error(Time)	Linear	14.6579	14	1.04699
	Order 4	12.4363	1	12.4363	9.05259	0.00754049	0.334629	9.05259	0.81194			a. Computed using alpha = .05											a. Computed using alpha = .05
Time * Surgery	Linear	87.2124	1	87.2124	7.81206	0.011964	0.302652	7.81206	0.752855
	Quadratic	7.2611	1	7.2611	2.45717	0.134401	0.120113	2.45717	0.317438
	Cubic	11.1817	1	11.1817	4.31866	0.0522778	0.1935	4.31866	0.502777			Tests of Between-Subjects Effects											Tests of Between-Subjects Effects
	Order 4	0.0483806	1	0.0483806	0.0352171	0.853241	0.00195268	0.0352171	0.0536321			Measure:Mechanicalsensitivity Transformed Variable:Average											Measure:Mechanicalsensitivitypaw Transformed Variable:Average
Error(Time)	Linear	200.949	18	11.1638								Source	Type III Sum of Squares	df	Mean Square	F	Sig.	Partial Eta Squared	Noncent. Parameter	Observed Powera			Source	Type III Sum of Squares	df	Mean Square	F	Sig.	Partial Eta Squared	Noncent. Parameter	Observed Powera
	Quadratic	53.1913	18	2.95507								Intercept	2028.37	1	2028.37	404.367	9.99023e-12	0.966537	404.367	1			Intercept	212.232	1	212.232	116.756	3.54969e-08	0.89293	116.756	1
	Cubic	46.6049	18	2.58916								Surgery	67.0772	1	67.0772	13.3722	0.00258968	0.488533	13.3722	0.924569			Surgery	0.602253	1	0.602253	0.331319	0.574019	0.0231185	0.331319	0.0836506
	Order 4	24.7281	18	1.37378								Error	70.2261	14	5.01615								Error	25.4484	14	1.81774
a. Computed using alpha = .05												a. Computed using alpha = .05											a. Computed using alpha = .05
Tests of Between-Subjects Effects
Measure:Mechanicalsensitivity Transformed Variable:Average												Estimated Marginal Means											Estimated Marginal Means
Source	Type III Sum of Squares	df	Mean Square	F	Sig.	Partial Eta Squared	Noncent. Parameter	Observed Powera
Intercept	9249.63	1	9249.63	274.365	2.4254e-12	0.938433	274.365	1				1. Grand Mean											1. Grand Mean
Surgery	273.472	1	273.472	8.11181	0.0106747	0.310657	8.11181	0.768404				Measure:Mechanicalsensitivity											Measure:Mechanicalsensitivitypaw
Error	606.832	18	33.7129									Mean	Std. Error	95% Confidence Interval									Mean	Std. Error	95% Confidence Interval
a. Computed using alpha = .05														Lower Bound	Upper Bound										Lower Bound	Upper Bound
												7.96156	0.395923	7.11239	8.81073								2.57531	0.238337	2.06413	3.08649
Estimated Marginal Means
												2. Surgery											2. Surgery
1. Grand Mean
Measure:Mechanicalsensitivity												Estimates											Estimates
Mean	Std. Error	95% Confidence Interval										Measure:Mechanicalsensitivity											Measure:Mechanicalsensitivitypaw
		Lower Bound	Upper Bound									Surgery	Mean	Std. Error	95% Confidence Interval								Surgery	Mean	Std. Error	95% Confidence Interval
9.6175	0.580628	8.39765	10.8374												Lower Bound	Upper Bound										Lower Bound	Upper Bound
												Endo	9.40938	0.559919	8.20847	10.6103							Endo	2.43812	0.337059	1.7152	3.16105
												Sham	6.51375	0.559919	5.31284	7.71466							Sham	2.7125	0.337059	1.98958	3.43542
2. Surgery
												Pairwise Comparisons											Pairwise Comparisons
Estimates												Measure:Mechanicalsensitivity											Measure:Mechanicalsensitivitypaw
Measure:Mechanicalsensitivity												(I) Surgery	(J) Surgery	Mean Difference (I-J)	Std. Error	Sig.a	95% Confidence Interval for Differencea						(I) Surgery	(J) Surgery	Mean Difference (I-J)	Std. Error	Sig.a	95% Confidence Interval for Differencea
Surgery	Mean	Std. Error	95% Confidence Interval														Lower Bound	Upper Bound										Lower Bound	Upper Bound
			Lower Bound	Upper Bound								Endo	Sham	2.896*	0.791845	0.00258968	1.19729	4.59396					Endo	Sham	-0.274375	0.476674	0.574019	-1.29674	0.747988
Endo	11.2712	0.821132	9.54607	12.9963								Sham	Endo	-2.896*	0.791845	0.00258968	-4.59396	-1.19729					Sham	Endo	0.274375	0.476674	0.574019	-0.747988	1.29674
Sham	7.9638	0.821132	6.23867	9.68893								Based on estimated marginal means											Based on estimated marginal means
												*. The mean difference is significant at the .05 level. a. Adjustment for multiple comparisons: Bonferroni.											a. Adjustment for multiple comparisons: Bonferroni.
Pairwise Comparisons
Measure:Mechanicalsensitivity												Univariate Tests											Univariate Tests
(I) Surgery	(J) Surgery	Mean Difference (I-J)	Std. Error	Sig.a	95% Confidence Interval for Differencea							Measure:MEASURE_1											Measure:Mechanicalsensitivitypaw
					Lower Bound	Upper Bound							Sum of Squares	df	Mean Square	F	Sig.	Partial Eta Squared	Noncent. Parameter	Observed Powera				Sum of Squares	df	Mean Square	F	Sig.	Partial Eta Squared	Noncent. Parameter	Observed Powera
Endo	Sham	3.307*	1.16126	0.0106747	0.867692	5.74711						Contrast	33.5386	1	33.5386	13.3722	0.00258968	0.488533	13.3722	0.924569			Contrast	0.301127	1	0.301127	0.331319	0.574019	0.0231185	0.331319	0.0836506
Sham	Endo	-3.307*	1.16126	0.0106747	-5.74711	-0.867692						Error	35.1131	14	2.50808								Error	12.7242	14	0.908871
Based on estimated marginal means												The F tests the effect of Surgery. This test is based on the linearly independent pairwise comparisons among the estimated marginal means.											The F tests the effect of Surgery. This test is based on the linearly independent pairwise comparisons among the estimated marginal means.
*. The mean difference is significant at the .05 level. a. Adjustment for multiple comparisons: Bonferroni.												a. Computed using alpha = .05											a. Computed using alpha = .05
Univariate Tests
Measure:Mechanicalsensitivity												3. Time											3. Time
	Sum of Squares	df	Mean Square	F	Sig.	Partial Eta Squared	Noncent. Parameter	Observed Powera
Contrast	54.6945	1	54.6945	8.11181	0.0106747	0.310657	8.11181	0.768404				Estimates											Estimates
Error	121.366	18	6.74257									Measure:Mechanicalsensitivity											Measure:Mechanicalsensitivitypaw
The F tests the effect of Surgery. This test is based on the linearly independent pairwise comparisons among the estimated marginal means.												Time	Mean	Std. Error	95% Confidence Interval								Time	Mean	Std. Error	95% Confidence Interval
a. Computed using alpha = .05															Lower Bound	Upper Bound										Lower Bound	Upper Bound
												1	6.16	0.313048	5.48858	6.83142							1	2.81063	0.273753	2.22348	3.39777
												2	9.76313	0.523842	8.6396	10.8867							2	2.34	0.322653	1.64798	3.03202
3. Time
												Pairwise Comparisons											Pairwise Comparisons
Estimates												Measure:MEASURE_1											Measure:Mechanicalsensitivitypaw
Measure:Mechanicalsensitivity												(I) Time	(J) Time	Mean Difference (I-J)	Std. Error	Sig.a	95% Confidence Interval for Differencea						(I) Time	(J) Time	Mean Difference (I-J)	Std. Error	Sig.a	95% Confidence Interval for Differencea
Time	Mean	Std. Error	95% Confidence Interval														Lower Bound	Upper Bound										Lower Bound	Upper Bound
			Lower Bound	Upper Bound								1	2	-3.603*	0.343219	5.0996e-08	-4.33926	-2.86699					1	2	0.470625	0.361765	0.214294	-0.305285	1.24653
1	6.2595	0.653837	4.88584	7.63316								2	1	3.603*	0.343219	5.0996e-08	2.86699	4.33926					2	1	-0.470625	0.361765	0.214294	-1.24653	0.305285
2	11.833	0.584012	10.606	13.06								Based on estimated marginal means											Based on estimated marginal means
3	10.7135	0.680249	9.28435	12.1427								*. The mean difference is significant at the .05 level. a. Adjustment for multiple comparisons: Bonferroni.											a. Adjustment for multiple comparisons: Bonferroni.
4	9.8175	0.862622	8.0052	11.6298
5	9.464	0.783778	7.81734	11.1107								Multivariate Tests											Multivariate Tests
													Value	F	Hypothesis df	Error df	Sig.	Partial Eta Squared	Noncent. Parameter	Observed Powerb				Value	F	Hypothesis df	Error df	Sig.	Partial Eta Squared	Noncent. Parameter	Observed Powerb
Pairwise Comparisons												Pillai's trace	0.887287	110.209a	1	14	5.0996e-08	0.887287	110.209	1			Pillai's trace	0.107847	1.692a	1	14	0.214294	0.107847	1.69237	0.22823
Measure:Mechanicalsensitivity												Wilks' lambda	0.112713	110.209a	1	14	5.0996e-08	0.887287	110.209	1			Wilks' lambda	0.892153	1.692a	1	14	0.214294	0.107847	1.69237	0.22823
(I) Time	(J) Time	Mean Difference (I-J)	Std. Error	Sig.a	95% Confidence Interval for Differencea							Hotelling's trace	7.87205	110.209a	1	14	5.0996e-08	0.887287	110.209	1			Hotelling's trace	0.120884	1.692a	1	14	0.214294	0.107847	1.69237	0.22823
					Lower Bound	Upper Bound						Roy's largest root	7.87205	110.209a	1	14	5.0996e-08	0.887287	110.209	1			Roy's largest root	0.120884	1.692a	1	14	0.214294	0.107847	1.69237	0.22823
1	2	-5.574*	0.621685	4.66603e-07	-7.56076	-3.58624						Each F tests the multivariate effect of Time. These tests are based on the linearly independent pairwise comparisons among the estimated marginal means.											Each F tests the multivariate effect of Time. These tests are based on the linearly independent pairwise comparisons among the estimated marginal means.
	3	-4.454*	0.834013	0.000447035	-7.11999	-1.78801						a. Exact statistic b. Computed using alpha = .05											a. Exact statistic b. Computed using alpha = .05
	4	-3.558*	0.935324	0.0129967	-6.54783	-0.568168
	5	-3.205*	0.935717	0.0302192	-6.19559	-0.21341
2	1	5.574*	0.621685	4.66603e-07	3.58624	7.56076						4. Surgery * Time											4. Surgery * Time
	3	1.1195	0.514521	0.431347	-0.525205	2.7642
	4	2.0155	0.706917	0.106063	-0.244212	4.27521						Estimates											Estimates
	5	2.369*	0.656818	0.0201654	0.269433	4.46857						Measure:Mechanicalsensitivity											Measure:Mechanicalsensitivitypaw
3	1	4.454*	0.834013	0.000447035	1.78801	7.11999						Surgery	Time	Mean	Std. Error	95% Confidence Interval							Surgery	Time	Mean	Std. Error	95% Confidence Interval
	2	-1.1195	0.514521	0.431347	-2.7642	0.525205										Lower Bound	Upper Bound										Lower Bound	Upper Bound
	4	0.896	0.461276	0.678967	-0.578502	2.3705						Endo	1	6.02	0.442717	5.07047	6.96953						Endo	1	2.6475	0.387145	1.81716	3.47784
	5	1.249*	0.386716	0.046348	0.0133341	2.48567							2	12.7988	0.740824	11.2098	14.3877							2	2.22875	0.456301	1.25008	3.20742
4	1	3.558*	0.935324	0.0129967	0.568168	6.54783						Sham	1	6.3	0.442717	5.35047	7.24953						Sham	1	2.97375	0.387145	2.14341	3.80409
	2	-2.0155	0.706917	0.106063	-4.27521	0.244212							2	6.7275	0.740824	5.13859	8.31641							2	2.45125	0.456301	1.47258	3.42992
	3	-0.896	0.461276	0.678967	-2.3705	0.578502
	5	0.3535	0.360267	1	-0.79812	1.50512						Pairwise Comparisons											Pairwise Comparisons
5	1	3.205*	0.935717	0.0302192	0.21341	6.19559						Measure:Mechanicalsensitivity											Measure:Mechanicalsensitivitypaw
	2	-2.369*	0.656818	0.0201654	-4.46857	-0.269433						Time	(I) Surgery	(J) Surgery	Mean Difference (I-J)	Std. Error	Sig.a	95% Confidence Interval for Differencea					Time	(I) Surgery	(J) Surgery	Mean Difference (I-J)	Std. Error	Sig.a	95% Confidence Interval for Differencea
	3	-1.249*	0.386716	0.046348	-2.48567	-0.0133341												Lower Bound	Upper Bound										Lower Bound	Upper Bound
	4	-0.3535	0.360267	1	-1.50512	0.79812						1	Endo	Sham	-0.28	0.626096	0.66156	-1.62284	1.06284				1	Endo	Sham	-0.32625	0.547506	0.560764	-1.50053	0.848034
Based on estimated marginal means													Sham	Endo	0.28	0.626096	0.66156	-1.06284	1.62284					Sham	Endo	0.32625	0.547506	0.560764	-0.848034	1.50053
*. The mean difference is significant at the .05 level. a. Adjustment for multiple comparisons: Bonferroni.												2	Endo	Sham	6.071*	1.04768	4.6442e-05	3.82419	8.31831				2	Endo	Sham	-0.2225	0.645307	0.735372	-1.60655	1.16155
													Sham	Endo	-6.071*	1.04768	4.6442e-05	-8.31831	-3.82419					Sham	Endo	0.2225	0.645307	0.735372	-1.16155	1.60655
Multivariate Tests												Based on estimated marginal means											Based on estimated marginal means
	Value	F	Hypothesis df	Error df	Sig.	Partial Eta Squared	Noncent. Parameter	Observed Powerb				a. Adjustment for multiple comparisons: Bonferroni. *. The mean difference is significant at the .05 level.											a. Adjustment for multiple comparisons: Bonferroni.
Pillai's trace	0.850614	21.353a	4	15	4.73535e-06	0.850614	85.4112	1
Wilks' lambda	0.149386	21.353a	4	15	4.73535e-06	0.850614	85.4112	1				Univariate Tests											Univariate Tests
Hotelling's trace	5.69408	21.353a	4	15	4.73535e-06	0.850614	85.4112	1				Measure:Mechanicalsensitivity											Measure:Mechanicalsensitivitypaw
Roy's largest root	5.69408	21.353a	4	15	4.73535e-06	0.850614	85.4112	1				Time		Sum of Squares	df	Mean Square	F	Sig.	Partial Eta Squared	Noncent. Parameter	Observed Powera		Time		Sum of Squares	df	Mean Square	F	Sig.	Partial Eta Squared	Noncent. Parameter	Observed Powera
Each F tests the multivariate effect of Time. These tests are based on the linearly independent pairwise comparisons among the estimated marginal means.												1	Contrast	0.3136	1	0.3136	0.200002	0.66156	0.0140846	0.200002	0.0701825		1	Contrast	0.425756	1	0.425756	0.355077	0.560764	0.0247353	0.355077	0.0861033
a. Exact statistic b. Computed using alpha = .05													Error	21.9518	14	1.56799								Error	16.7867	14	1.19905
												2	Contrast	147.44	1	147.44	33.5812	4.6442e-05	0.705766	33.5812	0.999669		2	Contrast	0.198025	1	0.198025	0.118885	0.735372	0.00842029	0.118885	0.0619454
													Error	61.4678	14	4.39056								Error	23.3196	14	1.66568
4. Surgery * Time												Each F tests the simple effects of Surgery within each level combination of the other effects shown. These tests are based on the linearly independent pairwise comparisons among the estimated marginal means.											Each F tests the simple effects of Surgery within each level combination of the other effects shown. These tests are based on the linearly independent pairwise comparisons among the estimated marginal means.
												a. Computed using alpha = .05											a. Computed using alpha = .05
Estimates
Measure:Mechanicalsensitivity
Surgery	Time	Mean	Std. Error	95% Confidence Interval								5. Surgery * Time											5. Surgery * Time
				Lower Bound	Upper Bound
Endo	1	6.501	0.924665	4.55835	8.44365							Estimates											Estimates
	2	12.538	0.825917	10.8028	14.2732							Measure:Mechanicalsensitivity											Measure:Mechanicalsensitivitypaw
	3	12.654	0.962018	10.6329	14.6751							Surgery	Time	Mean	Std. Error	95% Confidence Interval							Surgery	Time	Mean	Std. Error	95% Confidence Interval
	4	12.789	1.21993	10.226	15.352											Lower Bound	Upper Bound										Lower Bound	Upper Bound
	5	11.874	1.10843	9.54528	14.2027							Endo	1	6.02	0.442717	5.07047	6.96953						Endo	1	2.6475	0.387145	1.81716	3.47784
Sham	1	6.018	0.924665	4.07535	7.96065								2	12.7988	0.740824	11.2098	14.3877							2	2.22875	0.456301	1.25008	3.20742
	2	11.128	0.825917	9.39281	12.8632							Sham	1	6.3	0.442717	5.35047	7.24953						Sham	1	2.97375	0.387145	2.14341	3.80409
	3	8.773	0.962018	6.75188	10.7941								2	6.7275	0.740824	5.13859	8.31641							2	2.45125	0.456301	1.47258	3.42992
	4	6.846	1.21993	4.28302	9.40898
	5	7.054	1.10843	4.72528	9.38272							Pairwise Comparisons											Pairwise Comparisons
												Measure:Mechanicalsensitivity
Pairwise Comparisons												Surgery	(I) Time	(J) Time	Mean Difference (I-J)	Std. Error	Sig.a	95% Confidence Interval for Differencea					Surgery	(I) Time	(J) Time	Mean Difference (I-J)	Std. Error	Sig.a	95% Confidence Interval for Differencea
Measure:Mechanicalsensitivity																		Lower Bound	Upper Bound										Lower Bound	Upper Bound
Surgery	(I) Time	(J) Time	Mean Difference (I-J)	Std. Error	Sig.a	95% Confidence Interval for Differencea						Endo	1	2	-6.779*	0.485385	1.30473e-09	-7.8198	-5.7377				Endo	1	2	0.41875	0.511614	0.426791	-0.678552	1.51605
						Lower Bound	Upper Bound						2	1	6.779*	0.485385	1.30473e-09	5.7377	7.8198					2	1	-0.41875	0.511614	0.426791	-1.51605	0.678552
Endo	1	2	-6.037*	0.879196	2.00828e-05	-8.84742	-3.22658					Sham	1	2	-0.4275	0.485385	0.393325	-1.46855	0.613547				Sham	1	2	0.5225	0.511614	0.324447	-0.574802	1.6198
		3	-6.153*	1.17947	0.00058218	-9.92327	-2.38273						2	1	0.4275	0.485385	0.393325	-0.613547	1.46855					2	1	-0.5225	0.511614	0.324447	-1.6198	0.574802
		4	-6.288*	1.32275	0.00158647	-10.5163	-2.05974					Based on estimated marginal means											Based on estimated marginal means
		5	-5.373*	1.3233	0.00734327	-9.60304	-1.14296					*. The mean difference is significant at the .05 level. a. Adjustment for multiple comparisons: Bonferroni.											a. Adjustment for multiple comparisons: Bonferroni.
	2	1	6.037*	0.879196	2.00828e-05	3.22658	8.84742
		3	-0.116	0.727643	1	-2.44196	2.20996					Multivariate Tests											Multivariate Tests
		4	-0.251	0.999731	1	-3.44672	2.94472					Surgery		Value	F	Hypothesis df	Error df	Sig.	Partial Eta Squared	Noncent. Parameter	Observed Powerb		Surgery		Value	F	Hypothesis df	Error df	Sig.	Partial Eta Squared	Noncent. Parameter	Observed Powerb
		5	0.664	0.928881	1	-2.30524	3.63324					Endo	Pillai's trace	0.933028	195.041a	1	14	1.30473e-09	0.933028	195.041	1		Endo	Pillai's trace	0.0456665	.670a	1	14	0.426791	0.0456665	0.669924	0.118997
	3	1	6.153*	1.17947	0.00058218	2.38273	9.92327						Wilks' lambda	0.0669724	195.041a	1	14	1.30473e-09	0.933028	195.041	1			Wilks' lambda	0.954334	.670a	1	14	0.426791	0.0456665	0.669924	0.118997
		2	0.116	0.727643	1	-2.20996	2.44196						Hotelling's trace	13.9315	195.041a	1	14	1.30473e-09	0.933028	195.041	1			Hotelling's trace	0.0478517	.670a	1	14	0.426791	0.0456665	0.669924	0.118997
		4	-0.135	0.652342	1	-2.22026	1.95026						Roy's largest root	13.9315	195.041a	1	14	1.30473e-09	0.933028	195.041	1			Roy's largest root	0.0478517	.670a	1	14	0.426791	0.0456665	0.669924	0.118997
		5	0.78	0.546899	1	-0.968203	2.5282					Sham	Pillai's trace	0.052499	.776a	1	14	0.393325	0.052499	0.77571	0.130181		Sham	Pillai's trace	0.0693352	1.043a	1	14	0.324447	0.0693352	1.04301	0.158642
	4	1	6.288*	1.32275	0.00158647	2.05974	10.5163						Wilks' lambda	0.947501	.776a	1	14	0.393325	0.052499	0.77571	0.130181			Wilks' lambda	0.930665	1.043a	1	14	0.324447	0.0693352	1.04301	0.158642
		2	0.251	0.999731	1	-2.94472	3.44672						Hotelling's trace	0.0554079	.776a	1	14	0.393325	0.052499	0.77571	0.130181			Hotelling's trace	0.0745007	1.043a	1	14	0.324447	0.0693352	1.04301	0.158642
		3	0.135	0.652342	1	-1.95026	2.22026						Roy's largest root	0.0554079	.776a	1	14	0.393325	0.052499	0.77571	0.130181			Roy's largest root	0.0745007	1.043a	1	14	0.324447	0.0693352	1.04301	0.158642
		5	0.915	0.509494	0.893164	-0.713637	2.54364					Each F tests the multivariate simple effects of Time within each level combination of the other effects shown. These tests are based on the linearly independent pairwise comparisons among the estimated marginal means.											Each F tests the multivariate simple effects of Time within each level combination of the other effects shown. These tests are based on the linearly independent pairwise comparisons among the estimated marginal means.
	5	1	5.373*	1.3233	0.00734327	1.14296	9.60304					a. Exact statistic b. Computed using alpha = .05											a. Exact statistic b. Computed using alpha = .05
		2	-0.664	0.928881	1	-3.63324	2.30524
		3	-0.78	0.546899	1	-2.5282	0.968203
		4	-0.915	0.509494	0.893164	-2.54364	0.713637
Sham	1	2	-5.110*	0.879196	0.000165961	-7.92042	-2.29958
		3	-2.755	1.17947	0.312726	-6.52527	1.01527
		4	-0.828	1.32275	1	-5.05626	3.40026
		5	-1.036	1.3233	1	-5.26604	3.19404
	2	1	5.110*	0.879196	0.000165961	2.29958	7.92042
		3	2.355*	0.727643	0.0457978	0.0290362	4.68096
		4	4.282*	0.999731	0.00447508	1.08628	7.47772
		5	4.074*	0.928881	0.0035639	1.10476	7.04324
	3	1	2.755	1.17947	0.312726	-1.01527	6.52527
		2	-2.355*	0.727643	0.0457978	-4.68096	-0.0290362
		4	1.927	0.652342	0.0849322	-0.15826	4.01226
		5	1.719	0.546899	0.0562181	-0.0292025	3.4672
	4	1	0.828	1.32275	1	-3.40026	5.05626
		2	-4.282*	0.999731	0.00447508	-7.47772	-1.08628
		3	-1.927	0.652342	0.0849322	-4.01226	0.15826
		5	-0.208	0.509494	1	-1.83664	1.42064
	5	1	1.036	1.3233	1	-3.19404	5.26604
		2	-4.074*	0.928881	0.0035639	-7.04324	-1.10476
		3	-1.719	0.546899	0.0562181	-3.4672	0.0292025
		4	0.208	0.509494	1	-1.42064	1.83664
Based on estimated marginal means
*. The mean difference is significant at the .05 level. a. Adjustment for multiple comparisons: Bonferroni.
Multivariate Tests
Surgery		Value	F	Hypothesis df	Error df	Sig.	Partial Eta Squared	Noncent. Parameter	Observed Powerb
Endo	Pillai's trace	0.758489	11.777a	4	15	0.000157532	0.758489	47.109	0.998968
	Wilks' lambda	0.241511	11.777a	4	15	0.000157532	0.758489	47.109	0.998968
	Hotelling's trace	3.1406	11.777a	4	15	0.000157532	0.758489	47.109	0.998968
	Roy's largest root	3.1406	11.777a	4	15	0.000157532	0.758489	47.109	0.998968
Sham	Pillai's trace	0.760292	11.894a	4	15	0.000149225	0.760292	47.576	0.999058
	Wilks' lambda	0.239708	11.894a	4	15	0.000149225	0.760292	47.576	0.999058
	Hotelling's trace	3.17174	11.894a	4	15	0.000149225	0.760292	47.576	0.999058
	Roy's largest root	3.17174	11.894a	4	15	0.000149225	0.760292	47.576	0.999058
Each F tests the multivariate simple effects of Time within each level combination of the other effects shown. These tests are based on the linearly independent pairwise comparisons among the estimated marginal means.
a. Exact statistic b. Computed using alpha = .05
5. Surgery * Time
Estimates
Measure:Mechanicalsensitivity
Surgery	Time	Mean	Std. Error	95% Confidence Interval
				Lower Bound	Upper Bound
Endo	1	6.501	0.924665	4.55835	8.44365
	2	12.538	0.825917	10.8028	14.2732
	3	12.654	0.962018	10.6329	14.6751
	4	12.789	1.21993	10.226	15.352
	5	11.874	1.10843	9.54528	14.2027
Sham	1	6.018	0.924665	4.07535	7.96065
	2	11.128	0.825917	9.39281	12.8632
	3	8.773	0.962018	6.75188	10.7941
	4	6.846	1.21993	4.28302	9.40898
	5	7.054	1.10843	4.72528	9.38272
Pairwise Comparisons
Measure:Mechanicalsensitivity
Time	(I) Surgery	(J) Surgery	Mean Difference (I-J)	Std. Error	Sig.a	95% Confidence Interval for Differencea
						Lower Bound	Upper Bound
1	Endo	Sham	0.483	1.30767	0.71617	-2.26432	3.23032
	Sham	Endo	-0.483	1.30767	0.71617	-3.23032	2.26432
2	Endo	Sham	1.41	1.16802	0.242992	-1.04393	3.86393
	Sham	Endo	-1.41	1.16802	0.242992	-3.86393	1.04393
3	Endo	Sham	3.881*	1.3605	0.0105717	1.0227	6.7393
	Sham	Endo	-3.881*	1.3605	0.0105717	-6.7393	-1.0227
4	Endo	Sham	5.943*	1.72524	0.00289031	2.3184	9.5676
	Sham	Endo	-5.943*	1.72524	0.00289031	-9.5676	-2.3184
5	Endo	Sham	4.820*	1.56756	0.00652852	1.52669	8.11331
	Sham	Endo	-4.820*	1.56756	0.00652852	-8.11331	-1.52669
Based on estimated marginal means
a. Adjustment for multiple comparisons: Bonferroni. *. The mean difference is significant at the .05 level.
Univariate Tests
Measure:Mechanicalsensitivity
Time		Sum of Squares	df	Mean Square	F	Sig.	Partial Eta Squared	Noncent. Parameter	Observed Powera
1	Contrast	1.16644	1	1.16644	0.136425	0.71617	0.00752218	0.136425	0.0641533
	Error	153.901	18	8.55006
2	Contrast	9.9405	1	9.9405	1.45725	0.242992	0.0748951	1.45725	0.208055
	Error	122.785	18	6.8214
3	Contrast	75.3108	1	75.3108	8.1375	0.0105717	0.311334	8.1375	0.769697
	Error	166.586	18	9.25478
4	Contrast	176.596	1	176.596	11.8662	0.00289031	0.397312	11.8662	0.902505
	Error	267.882	18	14.8823
5	Contrast	116.162	1	116.162	9.45471	0.00652852	0.344375	9.45471	0.828279
	Error	221.151	18	12.2861
Each F tests the simple effects of Surgery within each level combination of the other effects shown. These tests are based on the linearly independent pairwise comparisons among the estimated marginal means.
a. Computed using alpha = .05
[truncated: 42 more columns]

## Sheet: Figure 1-figure supplement 1
Figure 1.figure supplement 1
Raw Data	Day -1																					Day 7																					Day 14
		Frequency of fresponse (out of ten applications)								AUC													Frequency of fresponse (out of ten applications)								AUC													Frequency of fresponse (out of ten applications)
	von Frey filament	1.65	2.36	2.44	2.83	3.22	3.61			Sham												von Frey filament	1.65	2.36	2.44	2.83	3.22	3.61			Sham												von Frey filament	1.65	2.36	2.44	2.83	3.22	3.61
	Sham	1	1	3	6	7	6			7.695												Sham	6	5	5	7	5	9			11.715												Sham	4	5	5	5	5	5
	Sham	2	2	3	3	3	2			4.935												Sham	4	4	6	4	5	5			8.895												Sham	2	2	3	3	1	3
	Sham	0	4	3	3	4	5			5.99												Sham	4	7	5	6	5	6			10.82												Sham	2	5	4	5	3	4
	Sham	1	1	2	4	2	7			4.925												Sham	7	5	5	5	6	5			10.9												Sham	4	4	6	4	6	5
	Sham	0	2	4	3	3	5			5.045												Sham	4	7	6	7	7	5			12.03												Sham	6	5	5	5	6	4
	Sham	1	5	6	4	4	5			7.835												Sham	7	5	4	9	7	5			12.615												Sham	5	2	4	5	4	4
	Sham	1	1	6	5	4	5			6.645												Sham	4	5	4	6	5	4			9.405												Sham	3	3	1	4	3	4
	Sham	0	1	2	5	2	2			3.985												Sham	5	5	4	2	3	6			7.81												Sham	3	7	7	6	5	7
	Sham	3	5	5	5	4	4			8.505												Sham	5	8	9	8	8	9			15.045												Sham	5	7	7	9	9	9
	Sham	0	2	2	3	4	3			4.575												Sham	4	5	6	7	8	7			12.02												Sham	3	5	3	3	3	4
	Mean	0.9	2.4	3.6	4.1	3.7	4.4		Mean	6.0135												Mean	5	5.6	5.4	6.1	5.9	6.1		Mean	11.1255												Mean	3.7	4.5	4.5	4.9	4.5	4.9
	SD	0.994429	1.64655	1.57762	1.1005	1.41814	1.64655		SD	1.57135												SD	1.24722	1.26491	1.50555	2.02485	1.59513	1.72884		SD	2.07147												SD	1.33749	1.77951	1.90029	1.72884	2.22361	1.79196
	SEM	0.314466	0.520683	0.498888	0.34801	0.448454	0.520683		SEM	0.496905												SEM	0.394405	0.4	0.476095	0.640312	0.504425	0.546707		SEM	0.655056												SEM	0.422953	0.562731	0.600925	0.546707	0.703167	0.566667
	CI	-1.08886	-0.89309	0.444757	1.89899	0.863727	1.10691		CI	2.8708												CI	2.50556	3.07018	2.38891	2.05031	2.70974	2.64232		CI	6.98256												CI	1.02501	0.940974	0.699415	1.44232	0.0527786	1.31609
		2.88886	5.69309	6.75524	6.30101	6.53627	7.69309			9.1562													7.49444	8.12982	8.41109	10.1497	9.09026	9.55768			15.2684													6.37499	8.05903	8.30058	8.35768	8.94722	8.48391
		Frequency of fresponse (out of ten applications)								AUC													Frequency of fresponse (out of ten applications)								AUC													Frequency of fresponse (out of ten applications)
	von Frey filament	1.65	2.36	2.44	2.83	3.22	3.61			Endo												von Frey filament	1.65	2.36	2.44	2.83	3.22	3.61			Endo												von Frey filament	1.65	2.36	2.44	2.83	3.22	3.61
	Endo	2	2	3	2	2	3			4.35												Endo	3	4	4	6	4	5			8.46												Endo	2	5	5	8	9	8
	Endo	0	2	2	2	1	0			2.43												Endo	3	5	5	6	5	5			9.48												Endo	5	4	5	4	4	4
	Endo	3	4	6	6	5	6			9.515												Endo	4	7	6	6	5	7			11.25												Endo	4	7	4	7	5	6
	Endo	4	8	8	9	8	10			15.04												Endo	6	10	10	10	10	10			18.18												Endo	7	7	8	10	9	10
	Endo	1	1	1	3	3	2			3.715												Endo	7	7	6	6	7	9			13.485												Endo	5	8	7	7	6	6
	Endo	1	2	5	4	3	4			5.83												Endo	6	8	9	10	9	6			15.985												Endo	5	7	8	9	9	8
	Endo	1	4	6	6	5	4			8.415												Endo	6	5	5	6	6	6			11.13												Endo	4	5	5	5	3	5
	Endo	1	0	3	2	2	1			2.815												Endo	5	6	7	8	8	8			13.59												Endo	7	8	6	7	8	8
	Endo	1	2	4	3	3	4			5.205												Endo	7	4	7	7	9	10			13.9												Endo	9	8	8	9	9	10
	Endo	2	2	3	4	7	6			7.665												Endo	4	4	7	5	6	5			9.91												Endo	4	5	5	7	6	4
	Mean	1.6	2.7	4.1	4.1	3.9	4		Mean	6.498												Mean	5.1	6	6.6	7	6.9	7.1		Mean	12.537												Mean	5.2	6.4	6.1	7.3	6.8	6.9
	SD	1.17379	2.21359	2.13177	2.28279	2.28279	2.86744		SD	3.82528												SD	1.52388	2	1.83787	1.76383	2.02485	2.02485		SD	3.0569												SD	1.98886	1.50555	1.52388	1.82878	2.29976	2.23358
	SEM	0.371184	0.7	0.674125	0.72188	0.72188	0.906765		SEM	1.20966												SEM	0.481894	0.632456	0.581187	0.557773	0.640312	0.640312		SEM	0.966677												SEM	0.628932	0.476095	0.481894	0.578312	0.727247	0.706321
	CI	-0.747576	-1.72719	-0.163541	-0.465572	-0.665572	-1.73488		CI	-1.15256												CI	2.05223	2	2.92425	3.47233	2.85031	3.05031		CI	6.4232												CI	1.22228	3.38891	3.05223	3.64244	2.20048	2.43284
		3.94758	7.12719	8.36354	8.66557	8.46557	9.73488			14.1486													8.14777	10	10.2757	10.5277	10.9497	11.1497			18.6508													9.17772	9.41109	9.14777	10.9576	11.3995	11.3672
Statistics	Within-Subjects Factors								Group Statistics														Within-Subjects Factors							Group Statistics														Within-Subjects Factors
	Measure:Frequency of response									Surgery	N	Mean	Std. Deviation	Std. Error Mean									Measure:Frequency of response								Surgery	N	Mean	Std. Deviation	Std. Error Mean									Measure:Frequency of response
	Filament	Dependent Variable							AUC	Sham	10	6.018	1.57136	0.496908									Filament	Dependent Variable						AUC	Sham	10	11.128	2.07202	0.65523									Filament	Dependent Variable
	1	1.65								Endo	10	6.498	3.82528	1.20966									1	1.65							Endo	10	12.537	3.0569	0.966677									1	1.65
	2	2.36																					2	2.36																				2	2.36
	3	2.44							Independent Samples Test														3	2.44						Independent Samples Test														3	2.44
	4	2.83									Levene's Test for Equality of Variances		t-test for Equality of Means										4	2.83								Levene's Test for Equality of Variances		t-test for Equality of Means										4	2.83
	5	3.22									F	Sig.	t	df	Sig. (2-tailed)	Mean Difference	Std. Error Difference	95% Confidence Interval of the Difference					5	3.22								F	Sig.	t	df	Sig. (2-tailed)	Mean Difference	Std. Error Difference	95% Confidence Interval of the Difference					5	3.22
	6	3.61																Lower	Upper				6	3.61															Lower	Upper				6	3.61
									AUC	Equal variances assumed	4.5724	0.0464562	-0.367044	18	0.717866	-0.48	1.30774	-3.22747	2.26747											AUC	Equal variances assumed	2.14578	0.160211	-1.20653	18	0.243233	-1.409	1.16781	-3.86249	1.04449
	Between-Subjects Factors									Equal variances not assumed			-0.367044	11.9533	0.720002	-0.48	1.30774	-3.33057	2.37057				Between-Subjects Factors								Equal variances not assumed			-1.20653	15.8285	0.245338	-1.409	1.16781	-3.88684	1.06884				Between-Subjects Factors
			Value Label	N																					Value Label	N																				Value Label	N
	Surgery	0	Sham	10																			Surgery	0	Sham	10																		Surgery	0	Sham	10
		1	Endo	10																				1	Endo	10																			1	Endo	10
	Descriptive Statistics																						Descriptive Statistics																					Descriptive Statistics
		Surgery	Mean	Std. Deviation	N																			Surgery	Mean	Std. Deviation	N																		Surgery	Mean	Std. Deviation	N
	1.65	Sham	0.9	0.994429	10																		1.65	Sham	5	1.24722	10																	1.65	Sham	3.7	1.33749	10
		Endo	1.6	1.17379	10																			Endo	5.1	1.52388	10																		Endo	5.2	1.98886	10
		Total	1.25	1.11803	20																			Total	5.05	1.35627	20																		Total	4.45	1.82021	20
	2.36	Sham	2.4	1.64655	10																		2.36	Sham	5.6	1.26491	10																	2.36	Sham	4.5	1.77951	10
		Endo	2.7	2.21359	10																			Endo	6	2	10																		Endo	6.4	1.50555	10
		Total	2.55	1.90498	20																			Total	5.8	1.64157	20																		Total	5.45	1.87715	20
	2.44	Sham	3.6	1.57762	10																		2.44	Sham	5.4	1.50555	10																	2.44	Sham	4.5	1.90029	10
		Endo	4.1	2.13177	10																			Endo	6.6	1.83787	10																		Endo	6.1	1.52388	10
		Total	3.85	1.8432	20																			Total	6	1.74718	20																		Total	5.3	1.8666	20
	2.83	Sham	4.1	1.1005	10																		2.83	Sham	6.1	2.02485	10																	2.83	Sham	4.9	1.72884	10
		Endo	4.1	2.28279	10																			Endo	7	1.76383	10																		Endo	7.3	1.82878	10
		Total	4.1	1.74416	20																			Total	6.55	1.90498	20																		Total	6.1	2.12504	20
	3.22	Sham	3.7	1.41814	10																		3.22	Sham	5.9	1.59513	10																	3.22	Sham	4.5	2.22361	10
		Endo	3.9	2.28279	10																			Endo	6.9	2.02485	10																		Endo	6.8	2.29976	10
		Total	3.8	1.85245	20																			Total	6.4	1.84676	20																		Total	5.65	2.49789	20
	3.61	Sham	4.4	1.64655	10																		3.61	Sham	6.1	1.72884	10																	3.61	Sham	4.9	1.79196	10
		Endo	4	2.86744	10																			Endo	7.1	2.02485	10																		Endo	6.9	2.23358	10
		Total	4.2	2.28496	20																			Total	6.6	1.90291	20																		Total	5.9	2.2219	20
	Multivariate Testsc																						Multivariate Testsc																					Multivariate Testsc
	Effect		Value	F	Hypothesis df	Error df	Sig.	Partial Eta Squared	Noncent. Parameter	Observed Powerb													Effect		Value	F	Hypothesis df	Error df	Sig.	Partial Eta Squared	Noncent. Parameter	Observed Powerb												Effect		Value	F	Hypothesis df	Error df
	Filament	Pillai's Trace	0.84598	15,379a	5	14	2.94676e-05	0.84598	76.8974	0.999985													Filament	Pillai's Trace	0.610376	4,386a	5	14	0.0130063	0.610376	21.9321	0.864815												Filament	Pillai's Trace	0.482152	2,607a	5	14
		Wilks' Lambda	0.15402	15,379a	5	14	2.94676e-05	0.84598	76.8974	0.999985														Wilks' Lambda	0.389624	4,386a	5	14	0.0130063	0.610376	21.9321	0.864815													Wilks' Lambda	0.517848	2,607a	5	14
		Hotelling's Trace	5.49267	15,379a	5	14	2.94676e-05	0.84598	76.8974	0.999985														Hotelling's Trace	1.56658	4,386a	5	14	0.0130063	0.610376	21.9321	0.864815													Hotelling's Trace	0.931068	2,607a	5	14
		Roy's Largest Root	5.49267	15,379a	5	14	2.94676e-05	0.84598	76.8974	0.999985														Roy's Largest Root	1.56658	4,386a	5	14	0.0130063	0.610376	21.9321	0.864815													Roy's Largest Root	0.931068	2,607a	5	14
	Filament * Surgery	Pillai's Trace	0.11421	,361a	5	14	0.866682	0.11421	1.80511	0.113536													Filament * Surgery	Pillai's Trace	0.156647	,520a	5	14	0.757187	0.156647	2.60041	0.146245												Filament * Surgery	Pillai's Trace	0.110419	,348a	5	14
		Wilks' Lambda	0.88579	,361a	5	14	0.866682	0.11421	1.80511	0.113536														Wilks' Lambda	0.843353	,520a	5	14	0.757187	0.156647	2.60041	0.146245													Wilks' Lambda	0.889581	,348a	5	14
		Hotelling's Trace	0.128936	,361a	5	14	0.866682	0.11421	1.80511	0.113536														Hotelling's Trace	0.185744	,520a	5	14	0.757187	0.156647	2.60041	0.146245													Hotelling's Trace	0.124125	,348a	5	14
		Roy's Largest Root	0.128936	,361a	5	14	0.866682	0.11421	1.80511	0.113536														Roy's Largest Root	0.185744	,520a	5	14	0.757187	0.156647	2.60041	0.146245													Roy's Largest Root	0.124125	,348a	5	14
	a. Exact statistic b. Computed using alpha = ,05 c. Design: Intercept + Surgery Within Subjects Design: Filament																						a. Exact statistic b. Computed using alpha = ,05 c. Design: Intercept + Surgery Within Subjects Design: Filament																					a. Exact statistic b. Computed using alpha = ,05 c. Design: Intercept + Surgery Within Subjects Design: Filament
	Mauchly's Test of Sphericityb																						Mauchly's Test of Sphericityb																					Mauchly's Test of Sphericityb
	Measure:Frequencyofresponse																						Measure:Frequency of response																					Measure:Frequency of response
	Within Subjects Effect	Mauchly's W	Approx. Chi-Square	df	Sig.	Epsilona																	Within Subjects Effect	Mauchly's W	Approx. Chi-Square	df	Sig.	Epsilona																Within Subjects Effect	Mauchly's W	Approx. Chi-Square	df	Sig.	Epsilona
						Greenhouse-Geisser	Huynh-Feldt	Lower-bound																				Greenhouse-Geisser	Huynh-Feldt	Lower-bound																			Greenhouse-Geisser
	Filament	0.555399	9.46791	14	0.802736	0.794044	1	0.2															Filament	0.276472	20.6989	14	0.113078	0.746496	1	0.2														Filament	0.383381	15.4355	14	0.354357	0.714863
	Tests the null hypothesis that the error covariance matrix of the orthonormalized transformed dependent variables is proportional to an identity matrix.																						Tests the null hypothesis that the error covariance matrix of the orthonormalized transformed dependent variables is proportional to an identity matrix.																					Tests the null hypothesis that the error covariance matrix of the orthonormalized transformed dependent variables is proportional to an identity matrix.
	a. May be used to adjust the degrees of freedom for the averaged tests of significance. Corrected tests are displayed in the Tests of Within-Subjects Effects table. b. Design: Intercept + Surgery Within Subjects Design: Filament																						a. May be used to adjust the degrees of freedom for the averaged tests of significance. Corrected tests are displayed in the Tests of Within-Subjects Effects table. b. Design: Intercept + Surgery Within Subjects Design: Filament																					a. May be used to adjust the degrees of freedom for the averaged tests of significance. Corrected tests are displayed in the Tests of Within-Subjects Effects table. b. Design: Intercept + Surgery Within Subjects Design: Filament
	Tests of Within-Subjects Effects																						Tests of Within-Subjects Effects																					Tests of Within-Subjects Effects
	Measure:Frequencyofresponse																						Measure:Frequency of response																					Measure:Frequency of response
	Source		Type III Sum of Squares	df	Mean Square	F	Sig.	Partial Eta Squared	Noncent. Parameter	Observed Powera													Source		Type III Sum of Squares	df	Mean Square	F	Sig.	Partial Eta Squared	Noncent. Parameter	Observed Powera												Source		Type III Sum of Squares	df	Mean Square	F
	Filament	Sphericity Assumed	135.342	5	27.0683	19.9548	2.44427e-13	0.525752	99.7741	1													Filament	Sphericity Assumed	34.7667	5	6.95333	4.6551	0.000796991	0.205477	23.2755	0.968687												Filament	Sphericity Assumed	33.675	5	6.735	5.4177
		Greenhouse-Geisser	135.342	3.97022	34.0892	19.9548	5.04328e-11	0.525752	79.225	1														Greenhouse-Geisser	34.7667	3.73248	9.31463	4.6551	0.00277368	0.205477	17.375	0.921973													Greenhouse-Geisser	33.675	3.57432	9.42138	5.4177
		Huynh-Feldt	135.342	5	27.0683	19.9548	2.44427e-13	0.525752	99.7741	1														Huynh-Feldt	34.7667	5	6.95333	4.6551	0.000796991	0.205477	23.2755	0.968687													Huynh-Feldt	33.675	4.81685	6.99108	5.4177
		Lower-bound	135.342	1	135.342	19.9548	0.00029787	0.525752	19.9548	0.988032														Lower-bound	34.7667	1	34.7667	4.6551	0.0447227	0.205477	4.6551	0.532656													Lower-bound	33.675	1	33.675	5.4177
	Filament * Surgery	Sphericity Assumed	3.74167	5	0.748333	0.551672	0.736649	0.0297371	2.75836	0.19533													Filament * Surgery	Sphericity Assumed	4.46667	5	0.893333	0.598066	0.70148	0.0321574	2.99033	0.209852												Filament * Surgery	Sphericity Assumed	3.275	5	0.655	0.526888
		Greenhouse-Geisser	3.74167	3.97022	0.942433	0.551672	0.697115	0.0297371	2.19026	0.175672														Greenhouse-Geisser	4.46667	3.73248	1.1967	0.598066	0.654026	0.0321574	2.23227	0.182718													Greenhouse-Geisser	3.275	3.57432	0.916259	0.526888
		Huynh-Feldt	3.74167	5	0.748333	0.551672	0.736649	0.0297371	2.75836	0.19533														Huynh-Feldt	4.46667	5	0.893333	0.598066	0.70148	0.0321574	2.99033	0.209852													Huynh-Feldt	3.275	4.81685	0.679905	0.526888
		Lower-bound	3.74167	1	3.74167	0.551672	0.467219	0.0297371	0.551672	0.108392														Lower-bound	4.46667	1	4.46667	0.598066	0.449354	0.0321574	0.598066	0.11342													Lower-bound	3.275	1	3.275	0.526888
	Error(Filament)	Sphericity Assumed	122.083	90	1.35648																		Error(Filament)	Sphericity Assumed	134.433	90	1.4937																	Error(Filament)	Sphericity Assumed	111.883	90	1.24315
		Greenhouse-Geisser	122.083	71.464	1.70832																			Greenhouse-Geisser	134.433	67.1846	2.00095																		Greenhouse-Geisser	111.883	64.3377	1.739
		Huynh-Feldt	122.083	90	1.35648																			Huynh-Feldt	134.433	90	1.4937																		Huynh-Feldt	111.883	86.7033	1.29042
		Lower-bound	122.083	18	6.78241																			Lower-bound	134.433	18	7.46852																		Lower-bound	111.883	18	6.21574
	a. Computed using alpha = ,05																						a. Computed using alpha = ,05																					a. Computed using alpha = ,05
	Tests of Within-Subjects Contrasts																						Tests of Within-Subjects Contrasts																					Tests of Within-Subjects Contrasts
	Measure:Frequencyofresponse																						Measure:Frequency of response																					Measure:Frequency of response
	Source	Filament	Type III Sum of Squares	df	Mean Square	F	Sig.	Partial Eta Squared	Noncent. Parameter	Observed Powera													Source	Filament	Type III Sum of Squares	df	Mean Square	F	Sig.	Partial Eta Squared	Noncent. Parameter	Observed Powera												Source	Filament	Type III Sum of Squares	df	Mean Square	F
	Filament	Linear	100.446	1	100.446	43.2057	3.56096e-06	0.70591	43.2057	0.999989													Filament	Linear	29.1457	1	29.1457	23.574	0.000127108	0.567037	23.574	0.995643												Filament	Linear	21.3779	1	21.3779	9.3681
		Quadratic	28.2881	1	28.2881	24.2085	0.000110374	0.573546	24.2085	0.996363														Quadratic	4.1006	1	4.1006	1.55154	0.228879	0.0793563	1.55154	0.218494													Quadratic	5.83393	1	5.83393	5.77851
		Cubic	2.77778	1	2.77778	1.75617	0.20168	0.088892	1.75617	0.241102														Cubic	0.2025	1	0.2025	0.106418	0.748022	0.00587737	0.106418	0.0610214													Cubic	0.780278	1	0.780278	0.583682
		Order 4	3.77857	1	3.77857	3.67645	0.0711966	0.169606	3.67645	0.442439														Order 4	0.0160714	1	0.0160714	0.0334021	0.857027	0.00185223	0.0334021	0.0534445													Order 4	0.0160714	1	0.0160714	0.0228491
		Order 5	0.0507937	1	0.0507937	0.074747	0.787659	0.00413544	0.074747	0.0577271														Order 5	1.30179	1	1.30179	1.08012	0.312431	0.0566096	1.08012	0.166298													Order 5	5.66687	1	5.66687	6.41068
	Filament * Surgery	Linear	2.835	1	2.835	1.21944	0.284015	0.0634482	1.21944	0.181711													Filament * Surgery	Linear	2.57143	1	2.57143	2.07986	0.166429	0.103579	2.07986	0.276622												Filament * Surgery	Linear	1.44643	1	1.44643	0.633847
		Quadratic	0.0595238	1	0.0595238	0.0509396	0.823979	0.00282199	0.0509396	0.0552586														Quadratic	1.1006	1	1.1006	0.416431	0.526864	0.0226119	0.416431	0.0938207													Quadratic	0.433929	1	0.433929	0.429807
		Cubic	0.217778	1	0.217778	0.137683	0.714926	0.00759101	0.137683	0.0642848														Cubic	0.0625	1	0.0625	0.0328451	0.85821	0.00182141	0.0328451	0.053387													Cubic	0.340278	1	0.340278	0.254543
		Order 4	0.00714286	1	0.00714286	0.00694981	0.934481	0.000385951	0.00694981	0.0507155														Order 4	0.216071	1	0.216071	0.449072	0.511282	0.0243412	0.449072	0.0973249													Order 4	0.216071	1	0.216071	0.307193
		Order 5	0.622222	1	0.622222	0.91565	0.351296	0.048407	0.91565	0.148155														Order 5	0.516071	1	0.516071	0.428195	0.52115	0.0232359	0.428195	0.0950826													Order 5	0.838294	1	0.838294	0.948325
	Error(Filament)	Linear	41.8471	18	2.32484																		Error(Filament)	Linear	22.2543	18	1.23635																	Error(Filament)	Linear	41.0757	18	2.28198
		Quadratic	21.0333	18	1.16852																			Quadratic	47.5726	18	2.64292																		Quadratic	18.1726	18	1.00959
		Cubic	28.4711	18	1.58173																			Cubic	34.2517	18	1.90287																		Cubic	24.0628	18	1.33682
		Order 4	18.5	18	1.02778																			Order 4	8.66071	18	0.481151																		Order 4	12.6607	18	0.703373
		Order 5	12.2317	18	0.679541																			Order 5	21.694	18	1.20522																		Order 5	15.9115	18	0.883973
	a. Computed using alpha = ,05																						a. Computed using alpha = ,05																					a. Computed using alpha = ,05
	Tests of Between-Subjects Effects																						Tests of Between-Subjects Effects																					Tests of Between-Subjects Effects
	Measure:Frequencyofresponse Transformed Variable:Average																						Measure:Frequency of response Transformed Variable:Average																					Measure:Frequency of response Transformed Variable:Average
	Source	Type III Sum of Squares	df	Mean Square	F	Sig.	Partial Eta Squared	Noncent. Parameter	Observed Powera														Source	Type III Sum of Squares	df	Mean Square	F	Sig.	Partial Eta Squared	Noncent. Parameter	Observed Powera													Source	Type III Sum of Squares	df	Mean Square	F	Sig.
	Intercept	1300.21	1	1300.21	92.7922	1.58313e-08	0.837534	92.7922	1														Intercept	4416.53	1	4416.53	418.042	6.57959e-14	0.95872	418.042	1													Intercept	3597.08	1	3597.08	244.314	6.45922e-12
	Surgery	1.40833	1	1.40833	0.100509	0.754868	0.00555282	0.100509	0.0604059														Surgery	17.6333	1	17.6333	1.66906	0.212726	0.0848572	1.66906	0.231489													Surgery	114.075	1	114.075	7.748	0.0122618
	Error	252.217	18	14.012																			Error	190.167	18	10.5648																		Error	265.017	18	14.7231
	a. Computed using alpha = ,05																						a. Computed using alpha = ,05																					a. Computed using alpha = ,05
[truncated: 24 more columns]

## Sheet: Figure 1-figure supplement 2
Figure 1.figure supplement 1 a : Frequency of response to von Frey filaments - pelvic area
Raw Data	Day -2																										Day 14
		Frequency of fresponse (out of ten applications)											AUC															Frequency of fresponse (out of ten applications)											AUC
	von Frey filament	1.65	2.36	2.44	2.83	3.22	3.61						Sham														von Frey filament	1.65	2.36	2.44	2.83	3.22	3.61						Sham
	Sham	1	3	3	4	4	6						6.535														Sham	3	3	4	4	5	5						7.675
	Sham	1	2	3	4	4	3						5.555														Sham	2	3	3	3	3	4						5.72
	Sham	2	3	2	4	4	3						6.07														Sham	3	4	4	4	4	5						7.68
	Sham	2	2	3	3	5	5						6.3														Sham	2	3	3	4	4	4						6.5
	Sham	2	3	4	5	5	6						7.905														Sham	2	3	4	4	5	5						7.32
	Sham	2	2	3	3	4	4						5.715														Sham	2	3	3	3	4	4						6.11
	Sham	1	3	3	5	4	4						6.535														Sham	2	3	3	4	5	5						7.085
	Sham	1	3	3	3	4	4						5.755														Sham	2	3	3	3	3	4						5.72
	Mean	1.5	2.625	3	3.875	4.25	4.375					Mean	6.29625														Mean	2.25	3.125	3.375	3.625	4.125	4.5					Mean	6.72625
	SD	0.534522	0.517549	0.534522	0.834523	0.46291	1.18773					SD	0.749623														SD	0.46291	0.353553	0.517549	0.517549	0.834523	0.534522					SD	0.823498
	SEM	0.188982	0.182981	0.188982	0.295048	0.163663	0.419928					SEM	0.265032														SEM	0.163663	0.125	0.182981	0.182981	0.295048	0.188982					SEM	0.29115
	CI	0.430955	1.5899	1.93096	2.20595	3.32418	1.99953					CI	4.797														CI	1.32418	2.41789	2.3399	2.5899	2.45595	3.43096					CI	5.07925
		2.56904	3.6601	4.06904	5.54405	5.17582	6.75047						7.7955															3.17582	3.83211	4.4101	4.6601	5.79405	5.56904						8.37325
		Frequency of fresponse (out of ten applications)											AUC															Frequency of fresponse (out of ten applications)											AUC
	von Frey filament	1.65	2.36	2.44	2.83	3.22	3.61						Endo														von Frey filament	1.65	2.36	2.44	2.83	3.22	3.61						Endo
	Endo	1	2	2	3	4	3						4.93														Endo	4	5	7	8	10	10						14.01
	Endo	1	2	2	4	4	4						5.515														Endo	3	3	5	6	6	7						9.47
	Endo	1	3	4	4	4	4						6.38														Endo	4	6	7	6	7	8						12.065
	Endo	1	3	4	4	4	4						6.38														Endo	4	6	7	6	7	8						12.065
	Endo	1	3	3	4	4	5						6.34														Endo	4	6	7	8	10	10						14.405
	Endo	0	2	2	3	3	3						4.185														Endo	4	4	6	6	6	7						10.455
	Endo	1	1	3	3	4	4						4.965														Endo	5	5	5	6	7	7						11.36
	Endo	4	5	5	5	5	5						9.445														Endo	7	10	10	10	10	10						18.535
	Mean	1.25	2.625	3.125	3.75	4	4					Mean	6.0175														Mean	4.375	5.625	6.75	7	7.875	8.375					Mean	12.7956
	SD	1.16496	1.18773	1.12599	0.707107	0.534522	0.755929					SD	1.60426														SD	1.18773	2.06588	1.58114	1.51186	1.80772	1.40789					SD	2.84535
	SEM	0.411877	0.419928	0.398098	0.25	0.188982	0.267261					SEM	0.567192														SEM	0.419928	0.730399	0.559017	0.534522	0.639126	0.497763					SEM	1.00598
	CI	-1.07993	0.24953	0.873017	2.33579	2.93096	2.48814					CI	2.80898														CI	1.99953	1.49324	3.58772	3.97628	4.25956	5.55923					CI	7.10492
		3.57993	5.00047	5.37698	5.16421	5.06904	5.51186						9.22602															6.75047	9.75676	9.91228	10.0237	11.4904	11.1908						18.4863
Statistics	Within-Subjects Factors											Group Statistics															Within-Subjects Factors											Group Statistics
	Measure: Frequency of response												Surgery	N	Mean	Std. Deviation	Std. Error Mean										Measure: Frequencyofresponse												Surgery	N	Mean	Std. Deviation	Std. Error Mean
	Filament	Dependent Variable										AUC	Endo	8	6.0175	1.60426	0.56719										Filament	Dependent Variable										AUC	Sham	8	6.7275	0.824634	0.291552
	1	Filament1.65											Sham	8	6.2963	0.74962	0.26503										1	Filament1.65											Endo	8	12.7988	2.84624	1.0063
	2	Filament2.36																									2	Filament2.36
	3	Filament2.44										Independent Samples Test															3	Filament2.44										Independent Samples Test
	4	Filament2.83												Levene's Test for Equality of Variances		t-test for Equality of Means											4	Filament2.83												Levene's Test for Equality of Variances		t-test for Equality of Means
	5	Filament3.22												F	Sig.	t	df	Sig. (2-tailed)	Mean Difference	Std. Error Difference	95% Confidence Interval of the Difference						5	Filament3.22												F	Sig.	t	df	Sig. (2-tailed)	Mean Difference	Std. Error Difference	95% Confidence Interval of the Difference
	6	Filament3.61																			Lower	Upper					6	Filament3.61																			Lower	Upper
												AUC	Equal variances assumed	2.041	0.175	-0.445	14	0.663	-0.27875	0.62606	-1.62151	1.06401																AUC	Equal variances assumed	5.49828	0.0342989	-5.79493	14	4.6442e-05	-6.07125	1.04768	-8.31831	-3.82419
													Equal variances not assumed			-0.445	9.918	0.666	-0.27875	0.62606	-1.67526	1.11776																	Equal variances not assumed			-5.79493	8.16696	0.000377165	-6.07125	1.04768	-8.47864	-3.66386
	Between-Subjects Factors																										Between-Subjects Factors
			N																										N
	Surgery	Endo	8																								Surgery	Endo	8
		Sham	8																									Sham	8
	Descriptive Statistics																										Descriptive Statistics
		Surgery	Mean	Std. Deviation	N																							Surgery	Mean	Std. Deviation	N
	Filament1.65	Endo	1.25	1.16496	8																						Filament1.65	Endo	4.375	1.18773	8
		Sham	1.5	0.53452	8																							Sham	2.25	0.46291	8
		Total	1.375	0.88506	16																							Total	3.3125	1.40089	16
	Filament2.36	Endo	2.625	1.18773	8																						Filament2.36	Endo	5.625	2.06588	8
		Sham	2.625	0.51755	8																							Sham	3.125	0.35355	8
		Total	2.625	0.88506	16																							Total	4.375	1.92787	16
	Filament2.44	Endo	3.125	1.12599	8																						Filament2.44	Endo	6.75	1.58114	8
		Sham	3	0.53452	8																							Sham	3.375	0.51755	8
		Total	3.0625	0.85391	16																							Total	5.0625	2.08066	16
	Filament2.83	Endo	3.75	0.70711	8																						Filament2.83	Endo	7	1.51186	8
		Sham	3.875	0.83452	8																							Sham	3.625	0.51755	8
		Total	3.8125	0.75	16																							Total	5.3125	2.05649	16
	Filament3.22	Endo	4	0.53452	8																						Filament3.22	Endo	7.875	1.80772	8
		Sham	4.25	0.46291	8																							Sham	4.125	0.83452	8
		Total	4.125	0.5	16																							Total	6	2.36643	16
	Filament3.61	Endo	4	0.75593	8																						Filament3.61	Endo	8.375	1.40789	8
		Sham	4.375	1.18773	8																							Sham	4.5	0.53452	8
		Total	4.1875	0.98107	16																							Total	6.4375	2.25	16
	Multivariate Testsa																										Multivariate Testsa
	Effect		Value	F	Hypothesis df	Error df	Sig.	Partial Eta Squared	Noncent. Parameter	Observed Powerc																	Effect		Value	F	Hypothesis df	Error df	Sig.	Partial Eta Squared	Noncent. Parameter	Observed Powerc
	Filament	Pillai's Trace	0.963	51.595b	5	10	0	0.963	257.974	1																	Filament	Pillai's Trace	0.934	28.407b	5	10	0	0.934	142.036	1
		Wilks' Lambda	0.037	51.595b	5	10	0	0.963	257.974	1																		Wilks' Lambda	0.066	28.407b	5	10	0	0.934	142.036	1
		Hotelling's Trace	25.797	51.595b	5	10	0	0.963	257.974	1																		Hotelling's Trace	14.204	28.407b	5	10	0	0.934	142.036	1
		Roy's Largest Root	25.797	51.595b	5	10	0	0.963	257.974	1																		Roy's Largest Root	14.204	28.407b	5	10	0	0.934	142.036	1
	Filament * Surgery	Pillai's Trace	0.125	.287b	5	10	0.91	0.125	1.434	0.093																	Filament * Surgery	Pillai's Trace	0.519	2.156b	5	10	0.141	0.519	10.779	0.468
		Wilks' Lambda	0.875	.287b	5	10	0.91	0.125	1.434	0.093																		Wilks' Lambda	0.481	2.156b	5	10	0.141	0.519	10.779	0.468
		Hotelling's Trace	0.143	.287b	5	10	0.91	0.125	1.434	0.093																		Hotelling's Trace	1.078	2.156b	5	10	0.141	0.519	10.779	0.468
		Roy's Largest Root	0.143	.287b	5	10	0.91	0.125	1.434	0.093																		Roy's Largest Root	1.078	2.156b	5	10	0.141	0.519	10.779	0.468
	a. Exact statistic b. Computed using alpha = ,05 c. Design: Intercept + Surgery Within Subjects Design: Filament																										a. Exact statistic b. Computed using alpha = ,05 c. Design: Intercept + Surgery Within Subjects Design: Filament
	Mauchly's Test of Sphericitya																										Mauchly's Test of Sphericitya
	Measure: Frequencyofresponse																										Measure: Frequencyofresponse
	Within Subjects Effect	Mauchly's W	Approx. Chi-Square	df	Sig.	Epsilonb																					Within Subjects Effect	Mauchly's W	Approx. Chi-Square	df	Sig.	Epsilonb	Epsilon
						Greenhouse-Geisser	Huynh-Feldt	Lower-bound																								Greenhouse-Geisser	Huynh-Feldt	Lower-bound
	Filament	0.324	13.649	14	0.485	0.745	1	0.2																			Filament	0.056	34.89	14	0.002	0.449	0.577	0.2
	Tests the null hypothesis that the error covariance matrix of the orthonormalized transformed dependent variables is proportional to an identity matrix.																										Tests the null hypothesis that the error covariance matrix of the orthonormalized transformed dependent variables is proportional to an identity matrix.
	a. May be used to adjust the degrees of freedom for the averaged tests of significance. Corrected tests are displayed in the Tests of Within-Subjects Effects table. b. Design: Intercept + Surgery Within Subjects Design: Filament																										a. May be used to adjust the degrees of freedom for the averaged tests of significance. Corrected tests are displayed in the Tests of Within-Subjects Effects table. b. Design: Intercept + Surgery Within Subjects Design: Filament
	Tests of Within-Subjects Effects																										Tests of Within-Subjects Effects
	Measure: Frequencyofresponse																										Measure: Frequencyofresponse
	Source		Type III Sum of Squares	df	Mean Square	F	Sig.	Partial Eta Squared	Noncent. Parameter	Observed Powera																	Source		Type III Sum of Squares	df	Mean Square	F	Sig.	Partial Eta Squared	Noncent. Parameter	Observed Powera
	Filament	Sphericity Assumed	94.177	5	18.835	54.231	0	0.795	271.153	1																	Filament	Sphericity Assumed	101.833	5	20.367	47.522	0	0.772	237.611	1
		Greenhouse-Geisser	94.177	3.724	25.292	54.231	0	0.795	201.933	1																		Greenhouse-Geisser	101.833	2.245	45.354	47.522	0	0.772	106.703	1
		Huynh-Feldt	94.177	5	18.835	54.231	0	0.795	271.153	1																		Huynh-Feldt	101.833	2.886	35.284	47.522	0	0.772	137.154	1
		Lower-bound	94.177	1	94.177	54.231	0	0.795	54.231	1																		Lower-bound	101.833	1	101.833	47.522	0	0.772	47.522	1
	Filament * Surgery	Sphericity Assumed	0.677	5	0.135	0.39	0.854	0.027	1.949	0.145																	Filament * Surgery	Sphericity Assumed	9.833	5	1.967	4.589	0.001	0.247	22.944	0.963
		Greenhouse-Geisser	0.677	3.724	0.182	0.39	0.802	0.027	1.452	0.13																		Greenhouse-Geisser	9.833	2.245	4.379	4.589	0.015	0.247	10.304	0.769
		Huynh-Feldt	0.677	5	0.135	0.39	0.854	0.027	1.949	0.145																		Huynh-Feldt	9.833	2.886	3.407	4.589	0.008	0.247	13.244	0.846
		Lower-bound	0.677	1	0.677	0.39	0.542	0.027	0.39	0.09																		Lower-bound	9.833	1	9.833	4.589	0.05	0.247	4.589	0.514
	Error(Filament)	Sphericity Assumed	24.313	70	0.347																						Error(Filament)	Sphericity Assumed	30	70	0.429
		Greenhouse-Geisser	24.313	52.13	0.466																							Greenhouse-Geisser	30	31.435	0.954
		Huynh-Feldt	24.313	70	0.347																							Huynh-Feldt	30	40.405	0.742
		Lower-bound	24.313	14	1.737																							Lower-bound	30	14	2.143
	a. Computed using alpha = ,05																										a. Computed using alpha = ,05
	Tests of Within-Subjects Contrasts																										Tests of Within-Subjects Contrasts
	Measure: Frequencyofresponse																										Measure: Frequencyofresponse
	Source	Filament	Type III Sum of Squares	df	Mean Square	F	Sig.	Partial Eta Squared	Noncent. Parameter	Observed Powera																	Source	Filament	Type III Sum of Squares	df	Mean Square	F	Sig.	Partial Eta Squared	Noncent. Parameter	Observed Powera
	Filament	Linear	85.251	1	85.251	154.464	0	0.917	154.464	1																	Filament	Linear	98.414	1	98.414	86.113	0	0.86	86.113	1
		Quadratic	7.894	1	7.894	22.161	0	0.613	22.161	0.992																		Quadratic	1.86	1	1.86	9.787	0.007	0.411	9.787	0.828
		Cubic	0.028	1	0.028	0.083	0.778	0.006	0.083	0.058																		Cubic	0.939	1	0.939	2.066	0.173	0.129	2.066	0.268
		Order 4	0.502	1	0.502	3.723	0.074	0.21	3.723	0.435																		Order 4	0.223	1	0.223	0.936	0.35	0.063	0.936	0.147
		Order 5	0.502	1	0.502	1.419	0.253	0.092	1.419	0.199																		Order 5	0.397	1	0.397	3.39	0.087	0.195	3.39	0.403
	Filament * Surgery	Linear	0.151	1	0.151	0.273	0.609	0.019	0.273	0.078																	Filament * Surgery	Linear	8.929	1	8.929	7.813	0.014	0.358	7.813	0.739
		Quadratic	0.394	1	0.394	1.105	0.311	0.073	1.105	0.165																		Quadratic	0.503	1	0.503	2.647	0.126	0.159	2.647	0.329
		Cubic	0.1	1	0.1	0.295	0.595	0.021	0.295	0.08																		Cubic	0	1	0	0	1	0	0	0.05
		Order 4	0.002	1	0.002	0.017	0.899	0.001	0.017	0.052																		Order 4	0.08	1	0.08	0.337	0.571	0.023	0.337	0.084
		Order 5	0.03	1	0.03	0.085	0.775	0.006	0.085	0.059																		Order 5	0.321	1	0.321	2.746	0.12	0.164	2.746	0.339
	Error(Filament)	Linear	7.727	14	0.552																						Error(Filament)	Linear	16	14	1.143
		Quadratic	4.987	14	0.356																							Quadratic	2.661	14	0.19
		Cubic	4.755	14	0.34																							Cubic	6.361	14	0.454
		Order 4	1.888	14	0.135																							Order 4	3.339	14	0.239
		Order 5	4.956	14	0.354																							Order 5	1.639	14	0.117
	a. Computed using alpha = ,05																										a. Computed using alpha = ,05
	Tests of Between-Subjects Effects																										Tests of Between-Subjects Effects
	Measure: Frequencyofresponse Transformed Variable: Average																										Measure: Frequencyofresponse
	Source	Type III Sum of Squares	df	Mean Square	F	Sig.	Partial Eta Squared	Noncent. Parameter	Observed Powera																		Transformed Variable: Average
	Intercept	981.76	1	981.76	386.493	0	0.965	386.493	1																		Source	Type III Sum of Squares	df	Mean Square	F	Sig.	Partial Eta Squared	Noncent. Parameter	Observed Powera
	Surgery	0.51	1	0.51	0.201	0.661	0.014	0.201	0.07																		Intercept	2480.67	1	2480.67	373.434	0	0.964	373.434	1
	Error	35.563	14	2.54																							Surgery	240.667	1	240.667	36.229	0	0.721	36.229	1
	a. Computed using alpha = ,05																										Error	93	14	6.643

## Sheet: Figure 1-figure supplement 3
Figure 1-figure suplement 3a: Mesometrium														Figure 1-figure suplement 3b: Myometrium
Raw Data		% of immunoreactive area												Raw Data		% of immunoreactive area
		Sham	Endo													Sham	Endo
		0.1665	0.283857													0.0186667	0.053875
		0.151714	0.199													0.049	0.0438
		0.095	0.2558													0.0526667	0.02775
		0.181167	0.1995													0.029	0.04075
		0.135875	0.15575													0.08025	0.013
		0.189	0.13575													0.018	0.051875
		0.155714	0.372286													0.057625	0.059
		0.144286	0.416857													0.0313384	0.094
		0.048	0.35975													0.011625	0.0932857
		0.18725	0.312833													0.07525	0.0911667
	Mean	0.145451	0.269138												Mean	0.0423422	0.0568502
	SD	0.0442744	0.0962593												SD	0.0242673	0.028132
	SEM	0.0140008	0.0304399												SEM	0.007674	0.00889612
	CI	0.0569019	0.0766196												CI	-0.00619247	0.000586233
		0.233999	0.461657													0.0908768	0.113114
Statistics	Group Statistics													Statistics	Group Statistics
		Surgery	N	Mean	Std. Deviation	Std. Error Mean										Surgery	N	Mean	Std. Deviation	Std. Error Mean
	Mesometrium	Sham	10	0.147	0.043729	0.0138283									Myometrium	Sham	10	0.043	0.0249666	0.00789515
		Endo	10	0.27	0.0949854	0.030037										Endo	10	0.055	0.0275882	0.00872417
	Independent Samples Test														Independent Samples Test
			Levene's Test for Equality of Variances		t-test for Equality of Means												Levene's Test for Equality of Variances		t-test for Equality of Means
			F	Sig.	t	df	Sig. (2-tailed)	Mean Difference	Std. Error Difference	95% Confidence Interval of the Difference							F	Sig.	t	df	Sig. (2-tailed)	Mean Difference	Std. Error Difference	95% Confidence Interval of the Difference
										Lower	Upper													Lower	Upper
	Mesometrium	Equal variances assumed	7.02449	0.0162759	-3.71969	18	0.00156835	-0.123	0.0330673	-0.192472	-0.0535282				Myometrium	Equal variances assumed	0.0280374	0.868888	-1.01987	18	0.321304	-0.012	0.0117662	-0.03672	0.01272
		Equal variances not assumed			-3.71969	12.651	0.00268695	-0.123	0.0330673	-0.194638	-0.0513617					Equal variances not assumed			-1.01987	17.8235	0.321436	-0.012	0.0117662	-0.0367375	0.0127375
