# Supplementary material for: Disease-modifying effects of natural Δ9-tetrahydrocannabinol in endometriosis-associated pain
Source: eLife. 2020 Jan 14;9:e50356. doi: 10.7554/eLife.50356 (PMC6977967; doi:10.7554/eLife.50356)
Supplement: Figure 2—source data 1. [file elife-50356-fig2-data1.xlsx]

## Sheet: Figure 2
	Figure 2a: Dose-response																		Figure 2b: Mechanical sensitivity
Raw data																		Raw data	Sham																					Endo
		Mechanical sensitivity (AUC)							Mechanical sensitivity (AUC)										Frequency of response (out of ten applications)																					Frequency of response (out of ten applications)
	Dose (mg/kg)	0.0	1.25	2	2.5	5		Dose (mg/kg)	0.0	1.25	2	2.5	5						log (10xForcemg)	1.65	2.36	2.44	2.83	3.22	3.61															log (10xForcemg)	1.65	2.36	2.44	2.83	3.22	3.61
	Sham	7.405	8.655	6.785	6.27	5.14		Endo	8.92	9.435	7.665	5.645	2.9						Dose 0.00 mg/kg	4	3	3	4	4	5															Dose 0.00 mg/kg	2	3	5	5	7	6
	Sham	5.72	4.975	6.11	3.91	1.17		Endo	8.11	8.97	5.715	5.95	1.17						Dose 0.00 mg/kg	2	3	3	3	3	4															Dose 0.00 mg/kg	3	4	5	4	4	6
	Sham	2.735	3.525	3.52	4.46	2.935		Endo	9.91	8.065	5.14	5.36	3.21						Dose 0.00 mg/kg	0	1	0	2	3	2															Dose 0.00 mg/kg	5	4	3	5	7	6
	Sham	4.34	4.695	3.365	3.72	3.21		Endo	10.645	8.53	9.32	5.84	5.795						Dose 0.00 mg/kg	1	1	2	2	4	4															Dose 0.00 mg/kg	3	4	5	7	7	7
	Sham	5.91	4.5	3.955	4.34	3.72		Endo	17.035	10.225	8.345	9.165	4.895						Dose 0.00 mg/kg	1	3	2	3	4	6															Dose 0.00 mg/kg	5	8	10	10	10	10
	Sham	3.56	4.025	2.975	4.61	2.345		Endo	9.275	7.315	5.325	6.31	2.935						Dose 0.00 mg/kg	0	2	1	2	3	3															Dose 0.00 mg/kg	3	3	5	5	6	8
	Sham	3.72	3.17	3.635	5.755	0.235		Endo	7.905	6.57	4.735	5.755	4.745						Dose 0.00 mg/kg	2	1	2	1	3	3															Dose 0.00 mg/kg	2	3	4	5	5	6
	Sham	8.25	11.405	9.28	6.77	3.4		Endo	11.745	8.835	8.53	6.62	3.825						Dose 0.00 mg/kg	2	2	3	5	7	7															Dose 0.00 mg/kg	2	6	7	7	7	8
	Sham	7.285	4.5	4.535	5.915	3.595		Endo	9.085	8.85	6.54	5.675	3.99						Dose 0.00 mg/kg	3	3	4	4	4	5															Dose 0.00 mg/kg	3	4	5	5	6	5
	Mean	5.19	5.09937	4.67188	4.935	2.57625		Mean	10.4637	8.42	6.70625	6.33437	3.82062						Mean	1.66667	2.11111	2.22222	2.88889	3.88889	4.33333															Mean	3.11111	4.33333	5.44444	5.88889	6.55556	6.88889
	SD	1.93166	2.61899	2.09847	1.08313	1.2574		SD	2.94142	1.11479	1.77685	1.20751	1.42019						SD	1.32288	0.927961	1.20185	1.2693	1.2693	1.58114															SD	1.16667	1.65831	2.00693	1.83333	1.66667	1.53659
	SEM	0.682946	0.925953	0.74192	0.382943	0.444558		SEM	1.03995	0.394138	0.62821	0.42692	0.502114						SEM	0.440959	0.30932	0.400617	0.423099	0.423099	0.527046															SEM	0.388889	0.552771	0.668977	0.611111	0.555556	0.512197
	CI	1.32667	-0.138608	0.474944	2.76875	0.0614495		CI	4.5809	6.19042	3.15256	3.91935	0.980241						CI	-0.979085	0.25519	-0.181479	0.350298	1.3503	1.17106															CI	0.777778	1.01671	1.43058	2.22222	3.22222	3.81571
		9.05333	10.3374	8.86881	7.10125	5.09105			16.3466	10.6496	10.2599	8.7494	6.66101							4.31242	3.96703	4.62592	5.42748	6.42748	7.49561																5.44444	7.64996	9.45831	9.55556	9.88889	9.96207
																			Frequency of response (out of ten applications)																					Frequency of response (out of ten applications)
																			log (10xForcemg)	1.65	2.36	2.44	2.83	3.22	3.61															log (10xForcemg)	1.65	2.36	2.44	2.83	3.22	3.61
																			Dose 1.25 mg/kg	4	3	5	5	5	5															Dose 1.25 mg/kg	4	3	5	5	6	7
																			Dose 1.25 mg/kg	1	3	3	2	3	4															Dose 1.25 mg/kg	1	6	5	5	5	6
																			Dose 1.25 mg/kg	1	2	1	2	2	3															Dose 1.25 mg/kg	3	3	4	3	6	7
																			Dose 1.25 mg/kg	1	2	1	4	3	3															Dose 1.25 mg/kg	2	3	5	5	6	6
Statistics		Between-Subjects Factors																	Dose 1.25 mg/kg	1	2	1	3	3	4															Dose 1.25 mg/kg	4	5	5	5	6	7
				Value Label	N														Dose 1.25 mg/kg	0	1	3	2	4	3															Dose 1.25 mg/kg	2	2	4	4	6	5
		Surgery	0	Sham	9														Dose 1.25 mg/kg	0	2	1	2	2	3															Dose 1.25 mg/kg	1	2	4	4	4	7
			1	Endo	9														Dose 1.25 mg/kg	3	8	4	6	7	6															Dose 1.25 mg/kg	0	3	6	6	7	6
																			Dose 1.25 mg/kg	2	1	2	3	3	3															Dose 1.25 mg/kg	3	4	4	4	7	5
		Descriptive Statistics																	Mean	1.44444	2.66667	2.33333	3.22222	3.55556	3.77778															Mean	2.22222	3.44444	4.66667	4.55556	5.88889	6.22222
			Surgery	Mean	Std. Deviation	N													SD	1.33333	2.12132	1.5	1.48137	1.5899	1.09291															SD	1.39443	1.33333	0.707107	0.881917	0.927961	0.833333
		Dose 0.00 mg/kg	Sham	5.43611	1.95193	9													SEM	0.444444	0.707107	0.5	0.493789	0.529966	0.364302															SEM	0.464811	0.444444	0.235702	0.293972	0.30932	0.277778
			Endo	10.2922	2.79916	9													CI	-1.22222	-1.57597	-0.666667	0.259491	0.375758	1.59196															CI	-0.566645	0.777778	3.25245	2.79172	4.03297	4.55556
			Total	7.86417	3.4238	18														4.11111	6.90931	5.33333	6.18495	6.73535	5.96359																5.01109	6.11111	6.08088	6.31939	7.74481	7.88889
		Dose 1.25 mg/kg	Sham	5.49444	2.72148	9
			Endo	8.53278	1.0963	9													Frequency of response (out of ten applications)																					Frequency of response (out of ten applications)
			Total	7.01361	2.54845	18													log (10xForcemg)	1.65	2.36	2.44	2.83	3.22	3.61															log (10xForcemg)	1.65	2.36	2.44	2.83	3.22	3.61
		Dose 2.00 mg/kg	Sham	4.90667	2.08549	9													Dose 2.00 mg/kg	4	4	2	3	3	5															Dose 2.00 mg/kg	3	1	4	6	5	5
			Endo	6.81278	1.69253	9													Dose 2.00 mg/kg	3	2	4	3	3	5															Dose 2.00 mg/kg	2	2	3	3	3	6
			Total	5.85972	2.08723	18													Dose 2.00 mg/kg	1	1	1	2	3	3															Dose 2.00 mg/kg	2	4	3	2	2	3
		Dose 2.50 mg/kg	Sham	5.08333	1.10659	9													Dose 2.00 mg/kg	0	2	1	3	2	2															Dose 2.00 mg/kg	2	5	5	5	6	6
			Endo	6.25778	1.15266	9													Dose 2.00 mg/kg	1	2	2	2	2	4															Dose 2.00 mg/kg	3	4	6	5	4	4
			Total	5.67056	1.25164	18													Dose 2.00 mg/kg	0	2	1	2	2	2															Dose 2.00 mg/kg	2	2	3	3	3	4
		Dose 5.00 mg/kg	Sham	2.86111	1.45387	9													Dose 2.00 mg/kg	0	1	3	2	3	3															Dose 2.00 mg/kg	1	2	2	2	4	4
			Endo	3.71833	1.36345	9													Dose 2.00 mg/kg	3	4	5	5	6	6															Dose 2.00 mg/kg	1	4	4	6	6	5
			Total	3.28972	1.43668	18													Dose 2.00 mg/kg	1	1	2	4	3	3															Dose 2.00 mg/kg	2	3	4	3	4	5
																			Mean	1.44444	2.11111	2.33333	2.88889	3	3.66667															Mean	2	3	3.77778	3.88889	4.11111	4.66667
		Multivariate Testsc																	SD	1.50923	1.16667	1.41421	1.05409	1.22474	1.41421															SD	0.707107	1.32288	1.20185	1.61589	1.36423	1
		Effect		Value	F	Hypothesis df	Error df	Sig.	Partial Eta Squared	Noncent. Parameter	Observed Powerb								SEM	0.503077	0.388889	0.471405	0.351364	0.408248	0.471405															SEM	0.235702	0.440959	0.400617	0.538631	0.454742	0.333333
		Dose	Pillai's Trace	0.862025	20.305a	4	13	1.69219e-05	0.862025	81.2202	0.999998								CI	-1.57402	-0.222222	-0.495094	0.780704	0.55051	0.83824															CI	0.585786	0.354249	1.37408	0.657102	1.38266	2.66667
			Wilks' Lambda	0.137975	20.305a	4	13	1.69219e-05	0.862025	81.2202	0.999998									4.46291	4.44444	5.16176	4.99707	5.44949	6.49509																3.41421	5.64575	6.18148	7.12068	6.83956	6.66667
			Hotelling's Trace	6.24771	20.305a	4	13	1.69219e-05	0.862025	81.2202	0.999998
			Roy's Largest Root	6.24771	20.305a	4	13	1.69219e-05	0.862025	81.2202	0.999998								Frequency of response (out of ten applications)																					Frequency of response (out of ten applications)
		Dose * Surgery	Pillai's Trace	0.642834	5.849a	4	13	0.00642472	0.642834	23.3976	0.915807								log (10xForcemg)	1.65	2.36	2.44	2.83	3.22	3.61															log (10xForcemg)	1.65	2.36	2.44	2.83	3.22	3.61
			Wilks' Lambda	0.357166	5.849a	4	13	0.00642472	0.642834	23.3976	0.915807								Dose 2.50 mg/kg	3	3	3	3	4	3															Dose 2.50 mg/kg	3	3	2	3	3	3
			Hotelling's Trace	1.79982	5.849a	4	13	0.00642472	0.642834	23.3976	0.915807								Dose 2.50 mg/kg	1	1	1	3	3	3															Dose 2.50 mg/kg	2	2	4	3	4	4
			Roy's Largest Root	1.79982	5.849a	4	13	0.00642472	0.642834	23.3976	0.915807								Dose 2.50 mg/kg	0	2	4	2	3	4															Dose 2.50 mg/kg	2	1	4	4	3	3
		a. Exact statistic b. Computed using alpha = .05 c. Design: Intercept + Surgery Within Subjects Design: Dose																	Dose 2.50 mg/kg	1	2	1	1	3	4															Dose 2.50 mg/kg	3	3	2	2	4	4
																			Dose 2.50 mg/kg	1	1	2	3	3	4															Dose 2.50 mg/kg	2	5	6	5	5	6
		Mauchly's Test of Sphericityb																	Dose 2.50 mg/kg	0	1	3	3	4	4															Dose 2.50 mg/kg	3	3	4	3	3	4
		Measure:Mechanicalsensitivity																	Dose 2.50 mg/kg	1	3	3	3	3	6															Dose 2.50 mg/kg	1	3	3	4	3	4
		Within Subjects Effect	Mauchly's W	Approx. Chi-Square	df	Sig.	Epsilona												Dose 2.50 mg/kg	2	2	5	4	5	3															Dose 2.50 mg/kg	3	3	2	3	5	4
							Greenhouse-Geisser	Huynh-Feldt	Lower-bound										Dose 2.50 mg/kg	2	3	3	2	4	5															Dose 2.50 mg/kg	2	2	2	4	4	3
		Dose	0.528234	9.20095	9	0.421965	0.789794	1	0.25										Mean	1.22222	2	2.77778	2.66667	3.55556	4															Mean	2.33333	2.77778	3.22222	3.44444	3.77778	3.88889
		Tests the null hypothesis that the error covariance matrix of the orthonormalized transformed dependent variables is proportional to an identity matrix.																	SD	0.971825	0.866025	1.30171	0.866025	0.726483	1															SD	0.707107	1.09291	1.39443	0.881917	0.833333	0.927961
		a. May be used to adjust the degrees of freedom for the averaged tests of significance. Corrected tests are displayed in the Tests of Within-Subjects Effects table. b. Design: Intercept + Surgery Within Subjects Design: Dose																	SEM	0.323942	0.288675	0.433903	0.288675	0.242161	0.333333															SEM	0.235702	0.364302	0.464811	0.293972	0.277778	0.30932
																			CI	-0.721428	0.267949	0.174361	0.934616	2.10259	2															CI	0.91912	0.591965	0.433355	1.68061	2.11111	2.03297
		Tests of Within-Subjects Effects																		3.16587	3.73205	5.38119	4.39872	5.00852	6																3.74755	4.96359	6.01109	5.20828	5.44444	5.74481
		Measure:Mechanicalsensitivity
		Source		Type III Sum of Squares	df	Mean Square	F	Sig.	Partial Eta Squared	Noncent. Parameter	Observed Powera								Frequency of response (out of ten applications)																					Frequency of response (out of ten applications)
		Dose	Sphericity Assumed	215.245	4	53.8113	33.7092	3.99852e-15	0.678128	134.837	1								log (10xForcemg)	1.65	2.36	2.44	2.83	3.22	3.61															log (10xForcemg)	1.65	2.36	2.44	2.83	3.22	3.61
			Greenhouse-Geisser	215.245	3.15918	68.1334	33.7092	2.16206e-12	0.678128	106.493	1								Dose 5.00 mg/kg	2	4	3	3	2	1															Dose 5.00 mg/kg	2	1	1	1	2	2
			Huynh-Feldt	215.245	4	53.8113	33.7092	3.99852e-15	0.678128	134.837	1								Dose 5.00 mg/kg	0	0	0	1	1	2															Dose 5.00 mg/kg	0	0	0	0	1	4
			Lower-bound	215.245	1	215.245	33.7092	2.67955e-05	0.678128	33.7092	0.999741								Dose 5.00 mg/kg	1	1	1	2	1	4															Dose 5.00 mg/kg	0	2	2	2	2	2
		Dose * Surgery	Sphericity Assumed	47.5218	4	11.8804	7.4423	5.48864e-05	0.317473	29.7692	0.994588								Dose 5.00 mg/kg	0	2	2	1	3	2															Dose 5.00 mg/kg	1	3	4	4	3	3
			Greenhouse-Geisser	47.5218	3.15918	15.0425	7.4423	0.000256466	0.317473	23.5115	0.982569								Dose 5.00 mg/kg	1	2	1	3	2	2															Dose 5.00 mg/kg	2	2	2	3	3	3
			Huynh-Feldt	47.5218	4	11.8804	7.4423	5.48864e-05	0.317473	29.7692	0.994588								Dose 5.00 mg/kg	1	0	1	2	2	1															Dose 5.00 mg/kg	1	1	1	2	2	2
			Lower-bound	47.5218	1	47.5218	7.4423	0.0148903	0.317473	7.4423	0.726301								Dose 5.00 mg/kg	0	0	1	0	0	0															Dose 5.00 mg/kg	2	3	3	2	2	3
		Error(Dose)	Sphericity Assumed	102.166	64	1.59634													Dose 5.00 mg/kg	0	1	2	3	2	3															Dose 5.00 mg/kg	0	0	3	3	3	4
			Greenhouse-Geisser	102.166	50.5468	2.02121													Dose 5.00 mg/kg	1	0	3	3	2	3															Dose 5.00 mg/kg	0	2	2	2	3	4
			Huynh-Feldt	102.166	64	1.59634													Mean	0.666667	1.11111	1.55556	2	1.66667	2															Mean	0.888889	1.55556	2	2.11111	2.33333	3
			Lower-bound	102.166	16	6.38537													SD	0.707107	1.36423	1.01379	1.11803	0.866025	1.22474															SD	0.927961	1.13039	1.22474	1.16667	0.707107	0.866025
		a. Computed using alpha = .05																	SEM	0.235702	0.454742	0.337931	0.372678	0.288675	0.408248															SEM	0.30932	0.376796	0.408248	0.388889	0.235702	0.288675
																			CI	-0.747547	-1.61734	-0.472032	-0.236068	-0.0653841	-0.44949															CI	-0.967033	-0.705221	-0.44949	-0.222222	0.91912	1.26795
		Tests of Within-Subjects Contrasts																		2.08088	3.83956	3.58314	4.23607	3.39872	4.44949																2.74481	3.81633	4.44949	4.44444	3.74755	4.73205
		Measure:Mechanicalsensitivity
		Source	Dose	Type III Sum of Squares	df	Mean Square	F	Sig.	Partial Eta Squared	Noncent. Parameter	Observed Powera
		Dose	Linear	198.146	1	198.146	87.4313	6.93451e-08	0.845308	87.4313	1
			Quadratic	5.64752	1	5.64752	3.11731	0.0965377	0.163062	3.11731	0.382177							Statistics	Within-Subjects Factors																					Within-Subjects Factors
			Cubic	6.41845	1	6.41845	4.32123	0.0540874	0.212646	4.32123	0.497456								Measure:Frequency of response																					Measure:Frequency of response
			Order 4	5.03375	1	5.03375	6.12328	0.0249175	0.27678	6.12328	0.642195								Filament	Dependent Variable																				Filament	Dependent Variable
		Dose * Surgery	Linear	43.7636	1	43.7636	19.3106	0.00045249	0.546878	19.3106	0.984536								1	1.65																				1	1.65
			Quadratic	3.71936	1	3.71936	2.053	0.171156	0.113721	2.053	0.270592								2	2.36																				2	2.36
			Cubic	0.0330756	1	0.0330756	0.0222682	0.883241	0.00138983	0.0222682	0.0522641								3	2.44																				3	2.44
			Order 4	0.00574294	1	0.00574294	0.00698596	0.934426	0.000436432	0.00698596	0.0507097								4	2.86																				4	2.86
		Error(Dose)	Linear	36.2608	16	2.2663													5	3.22																				5	3.22
			Quadratic	28.9867	16	1.81167													6	3.61																				6	3.61
			Cubic	23.7652	16	1.48533
			Order 4	13.1531	16	0.822068													Between-Subjects Factors																					Between-Subjects Factors
		a. Computed using alpha = .05																			N																					N
																			Dose	0	9																			Dose	0	9
		Tests of Between-Subjects Effects																		1.25	9																				1.25	9
		Measure:Mechanicalsensitivity Transformed Variable:Average																		2	9																				2	9
		Source	Type III Sum of Squares	df	Mean Square	F	Sig.	Partial Eta Squared	Noncent. Parameter	Observed Powera										2.5	9																				2.5	9
		Intercept	3175.05	1	3175.05	299.212	8.85664e-12	0.94924	299.212	1										5	9																				5	9
		Surgery	126.001	1	126.001	11.8742	0.00332226	0.425992	11.8742	0.898469
		Error	169.782	16	10.6114														Descriptive Statistics																					Descriptive Statistics
		a. Computed using alpha = .05																		Dose	Mean	Std. Deviation	N																		Dose	Mean	Std. Deviation	N
																			1.65	0	1.66667	1.32288	9																	1.65	0	3.11111	1.16667	9
																				1.25	1.44444	1.33333	9																		1.25	2.22222	1.39443	9
		Estimated Marginal Means																		2	1.44444	1.50923	9																		2	2	0.707107	9
																				2.5	1.22222	0.971825	9																		2.5	2.33333	0.707107	9
		1. Grand Mean																		5	0.666667	0.707107	9																		5	0.888889	0.927961	9
		Measure:Mechanicalsensitivity																		Total	1.28889	1.19891	45																		Total	2.11111	1.21023	45
		Mean	Std. Error	95% Confidence Interval															2.36	0	2.11111	0.927961	9																	2.36	0	4.33333	1.65831	9
				Lower Bound	Upper Bound															1.25	2.66667	2.12132	9																		1.25	3.44444	1.33333	9
		5.93956	0.343372	5.21164	6.66747															2	2.11111	1.16667	9																		2	3	1.32288	9
																				2.5	2	0.866025	9																		2.5	2.77778	1.09291	9
																				5	1.11111	1.36423	9																		5	1.55556	1.13039	9
		2. Surgery																		Total	2	1.39805	45																		Total	3.02222	1.55927	45
																			2.44	0	2.22222	1.20185	9																	2.44	0	5.44444	2.00693	9
		Estimates																		1.25	2.33333	1.5	9																		1.25	4.66667	0.707107	9
		Measure:Mechanicalsensitivity																		2	2.33333	1.41421	9																		2	3.77778	1.20185	9
		Surgery	Mean	Std. Error	95% Confidence Interval															2.5	2.77778	1.30171	9																		2.5	3.22222	1.39443	9
					Lower Bound	Upper Bound														5	1.55556	1.01379	9																		5	2	1.22474	9
		Sham	4.75633	0.485601	3.72691	5.78576														Total	2.24444	1.29957	45																		Total	3.82222	1.77468	45
		Endo	7.12278	0.485601	6.09335	8.15221													2.83	0	2.88889	1.2693	9																	2.83	0	5.88889	1.83333	9
																				1.25	3.22222	1.48137	9																		1.25	4.55556	0.881917	9
		Pairwise Comparisons																		2	2.88889	1.05409	9																		2	3.88889	1.61589	9
		Measure:Mechanicalsensitivity																		2.5	2.66667	0.866025	9																		2.5	3.44444	0.881917	9
		(I) Surgery	(J) Surgery	Mean Difference (I-J)	Std. Error	Sig.a	95% Confidence Interval for Differencea													5	2	1.11803	9																		5	2.11111	1.16667	9
							Lower Bound	Upper Bound												Total	2.73333	1.19469	45																		Total	3.97778	1.78998	45
		Sham	Endo	-2.366*	0.686744	0.00332226	-3.82228	-0.910613											3.22	0	3.88889	1.2693	9																	3.22	0	6.55556	1.66667	9
		Endo	Sham	2.366*	0.686744	0.00332226	0.910613	3.82228												1.25	3.55556	1.5899	9																		1.25	5.88889	0.927961	9
		Based on estimated marginal means																		2	3	1.22474	9																		2	4.11111	1.36423	9
		*. The mean difference is significant at the .05 level. a. Adjustment for multiple comparisons: Bonferroni.																		2.5	3.55556	0.726483	9																		2.5	3.77778	0.833333	9
																				5	1.66667	0.866025	9																		5	2.33333	0.707107	9
		Univariate Tests																		Total	3.13333	1.3751	45																		Total	4.53333	1.89017	45
		Measure:Mechanicalsensitivity																	3.61	0	4.33333	1.58114	9																	3.61	0	6.88889	1.53659	9
			Sum of Squares	df	Mean Square	F	Sig.	Partial Eta Squared	Noncent. Parameter	Observed Powera										1.25	3.77778	1.09291	9																		1.25	6.22222	0.833333	9
		Contrast	25.2003	1	25.2003	11.8742	0.00332226	0.425992	11.8742	0.898469										2	3.66667	1.41421	9																		2	4.66667	1	9
		Error	33.9564	16	2.12228															2.5	4	1	9																		2.5	3.88889	0.927961	9
		The F tests the effect of Surgery. This test is based on the linearly independent pairwise comparisons among the estimated marginal means.																		5	2	1.22474	9																		5	3	0.866025	9
		a. Computed using alpha = .05																		Total	3.55556	1.47024	45																		Total	4.93333	1.7761	45
																			Multivariate Testsd																					Multivariate Testsd
		3. Dose																	Effect		Value	F	Hypothesis df	Error df	Sig.	Partial Eta Squared	Noncent. Parameter	Observed Powerb												Effect		Value	F	Hypothesis df	Error df	Sig.	Partial Eta Squared	Noncent. Parameter	Observed Powerb
																			Filament	Pillai's Trace	0.812267	31.152a	5	36	3.97272e-12	0.812267	155.762	1												Filament	Pillai's Trace	0.860818	44.531a	5	36	1.97394e-14	0.860818	222.653	1
		Estimates																		Wilks' Lambda	0.187733	31.152a	5	36	3.97272e-12	0.812267	155.762	1													Wilks' Lambda	0.139182	44.531a	5	36	1.97394e-14	0.860818	222.653	1
		Measure:Mechanicalsensitivity																		Hotelling's Trace	4.32672	31.152a	5	36	3.97272e-12	0.812267	155.762	1													Hotelling's Trace	6.18482	44.531a	5	36	1.97394e-14	0.860818	222.653	1
		Dose	Mean	Std. Error	95% Confidence Interval															Roy's Largest Root	4.32672	31.152a	5	36	3.97272e-12	0.812267	155.762	1													Roy's Largest Root	6.18482	44.531a	5	36	1.97394e-14	0.860818	222.653	1
					Lower Bound	Upper Bound													Filament * Dose	Pillai's Trace	0.560614	1.27139	20	156	0.205943	0.140153	25.4277	0.847825												Filament * Dose	Pillai's Trace	0.584647	1.33522	20	156	0.16457	0.146162	26.7044	0.869785
		0	7.86417	0.568754	6.65846	9.06987														Wilks' Lambda	0.514725	1.33404	20	120.348	0.170987	0.15298	21.736	0.753167													Wilks' Lambda	0.467577	1.55009	20	120.348	0.0769727	0.17308	25.1898	0.830456
		1.25	7.01361	0.488999	5.97698	8.05024														Hotelling's Trace	0.803263	1.38563	20	138	0.139379	0.167233	27.7126	0.880348													Hotelling's Trace	1.0299	1.77658	20	138	0.0288614	0.204756	35.5316	0.958351
		2	5.85972	0.447646	4.91076	6.80869														Roy's Largest Root	0.600399	4.683c	5	39	0.00191594	0.375156	23.4156	0.955631													Roy's Largest Root	0.917942	7.160c	5	39	7.77305e-05	0.478608	35.7997	0.996601
		2.5	5.67056	0.266311	5.106	6.23511													a. Exact statistic b. Computed using alpha = .05 c. The statistic is an upper bound on F that yields a lower bound on the significance level. d. Design: Intercept + Dose Within Subjects Design: Filament																					a. Exact statistic b. Computed using alpha = .05 c. The statistic is an upper bound on F that yields a lower bound on the significance level. d. Design: Intercept + Dose Within Subjects Design: Filament
		5	3.28972	0.332195	2.5855	3.99395
																			Mauchly's Test of Sphericityb																					Mauchly's Test of Sphericityb
		Pairwise Comparisons																	Measure:Mechanicalsensitivity																					Measure:Mechanicalsensitivity
		Measure:Mechanicalsensitivity																	Within Subjects Effect	Mauchly's W	Approx. Chi-Square	df	Sig.	Epsilona																Within Subjects Effect	Mauchly's W	Approx. Chi-Square	df	Sig.	Epsilona
		(I) Dose	(J) Dose	Mean Difference (I-J)	Std. Error	Sig.a	95% Confidence Interval for Differencea																	Greenhouse-Geisser	Huynh-Feldt	Lower-bound																			Greenhouse-Geisser	Huynh-Feldt	Lower-bound
							Lower Bound	Upper Bound											Filament	0.693194	13.9616	14	0.453512	0.897001	1	0.2														Filament	0.42036	33.0191	14	0.00290883	0.773836	0.952722	0.2
		0	1.25	0.850556	0.473604	0.914137	-0.689601	2.39071											Tests the null hypothesis that the error covariance matrix of the orthonormalized transformed dependent variables is proportional to an identity matrix.																					Tests the null hypothesis that the error covariance matrix of the orthonormalized transformed dependent variables is proportional to an identity matrix.
			2	2.004*	0.429862	0.00259837	0.606537	3.40235											a. May be used to adjust the degrees of freedom for the averaged tests of significance. Corrected tests are displayed in the Tests of Within-Subjects Effects table. b. Design: Intercept + Dose Within Subjects Design: Filament																					a. May be used to adjust the degrees of freedom for the averaged tests of significance. Corrected tests are displayed in the Tests of Within-Subjects Effects table. b. Design: Intercept + Dose Within Subjects Design: Filament
			2.5	2.194*	0.393152	0.000414888	0.915085	3.47214
			5	4.574*	0.503973	1.03871e-06	2.93553	6.21336											Tests of Within-Subjects Effects																					Tests of Within-Subjects Effects
		1.25	0	-0.850556	0.473604	0.914137	-2.39071	0.689601											Measure:Mechanicalsensitivity																					Measure:Mechanicalsensitivity
			2	1.154*	0.277327	0.0073657	0.252022	2.05576											Source		Type III Sum of Squares	df	Mean Square	F	Sig.	Partial Eta Squared	Noncent. Parameter	Observed Powera												Source		Type III Sum of Squares	df	Mean Square	F	Sig.	Partial Eta Squared	Noncent. Parameter	Observed Powera
			2.5	1.343*	0.403558	0.0426004	0.0306881	2.65542											Filament	Sphericity Assumed	150.819	5	30.1637	42.7517	7.73645e-30	0.516626	213.759	1												Filament	Sphericity Assumed	237.822	5	47.5644	55.5707	5.12117e-36	0.581462	277.854	1
			5	3.724*	0.491426	1.11256e-05	2.12577	5.322												Greenhouse-Geisser	150.819	4.485	33.6273	42.7517	5.12871e-27	0.516626	191.742	1													Greenhouse-Geisser	237.822	3.86918	61.4658	55.5707	1.96643e-28	0.581462	215.013	1
		2	0	-2.004*	0.429862	0.00259837	-3.40235	-0.606537												Huynh-Feldt	150.819	5	30.1637	42.7517	7.73645e-30	0.516626	213.759	1													Huynh-Feldt	237.822	4.76361	49.9248	55.5707	1.9674e-34	0.581462	264.717	1
			1.25	-1.154*	0.277327	0.0073657	-2.05576	-0.252022												Lower-bound	150.819	1	150.819	42.7517	8.28054e-08	0.516626	42.7517	0.999995													Lower-bound	237.822	1	237.822	55.5707	4.40021e-09	0.581462	55.5707	1
			2.5	0.189167	0.381681	1	-1.05206	1.43039											Filament * Dose	Sphericity Assumed	19.237	20	0.961852	1.36325	0.144278	0.11997	27.2651	0.886986												Filament * Dose	Sphericity Assumed	33.6593	20	1.68296	1.96625	0.0102485	0.164316	39.325	0.980714
			5	2.570*	0.444386	0.000279879	1.12486	4.01514												Greenhouse-Geisser	19.237	17.94	1.0723	1.36325	0.155149	0.11997	24.4568	0.857004													Greenhouse-Geisser	33.6593	15.4767	2.17483	1.96625	0.019735	0.164316	30.4311	0.949521
		2.5	0	-2.194*	0.393152	0.000414888	-3.47214	-0.915085												Huynh-Feldt	19.237	20	0.961852	1.36325	0.144278	0.11997	27.2651	0.886986													Huynh-Feldt	33.6593	19.0544	1.76648	1.96625	0.0117372	0.164316	37.4658	0.976346
			1.25	-1.343*	0.403558	0.0426004	-2.65542	-0.0306881												Lower-bound	19.237	4	4.80926	1.36325	0.263845	0.11997	5.45302	0.385224													Lower-bound	33.6593	4	8.41481	1.96625	0.118284	0.164316	7.86499	0.539879
			2	-0.189167	0.381681	1	-1.43039	1.05206											Error(Filament)	Sphericity Assumed	141.111	200	0.705556																	Error(Filament)	Sphericity Assumed	171.185	200	0.855926
			5	2.381*	0.36283	6.54433e-05	1.20091	3.56075												Greenhouse-Geisser	141.111	179.4	0.786572																		Greenhouse-Geisser	171.185	154.767	1.10608
		5	1.25	-4.574*	0.503973	1.03871e-06	-6.21336	-2.93553												Huynh-Feldt	141.111	200	0.705556																		Huynh-Feldt	171.185	190.544	0.898401
			2	-3.724*	0.491426	1.11256e-05	-5.322	-2.12577												Lower-bound	141.111	40	3.52778																		Lower-bound	171.185	40	4.27963
			2.5	-2.570*	0.444386	0.000279879	-4.01514	-1.12486											a. Computed using alpha = .05																					a. Computed using alpha = .05
			5	-2.381*	0.36283	6.54433e-05	-3.56075	-1.20091
		Based on estimated marginal means																	Tests of Within-Subjects Contrasts																					Tests of Within-Subjects Contrasts
		a. Adjustment for multiple comparisons: Bonferroni. *. The mean difference is significant at the .05 level.																	Measure:Mechanicalsensitivity																					Measure:Mechanicalsensitivity
																			Source	Filament	Type III Sum of Squares	df	Mean Square	F	Sig.	Partial Eta Squared	Noncent. Parameter	Observed Powera												Source	Filament	Type III Sum of Squares	df	Mean Square	F	Sig.	Partial Eta Squared	Noncent. Parameter	Observed Powera
		Multivariate Tests																	Filament	Linear	148.96	1	148.96	165.687	8.31311e-16	0.80553	165.687	1												Filament	Linear	227.211	1	227.211	222.826	6.02635e-18	0.847808	222.826	1
			Value	F	Hypothesis df	Error df	Sig.	Partial Eta Squared	Noncent. Parameter	Observed Powerb										Quadratic	0.362169	1	0.362169	0.535131	0.468722	0.0132017	0.535131	0.110153													Quadratic	6.6881	1	6.6881	4.91346	0.0323978	0.109398	4.91346	0.58055
		Pillai's trace	0.862025	20.305a	4	13	1.69219e-05	0.862025	81.2202	0.999998										Cubic	0.521605	1	0.521605	0.823466	0.369603	0.0201714	0.823466	0.14359													Cubic	2.11864	1	2.11864	2.19992	0.145855	0.0521308	2.19992	0.304552
		Wilks' lambda	0.137975	20.305a	4	13	1.69219e-05	0.862025	81.2202	0.999998										Order 4	0.578571	1	0.578571	0.908128	0.346335	0.0221992	0.908128	0.153489													Order 4	0.000793651	1	0.000793651	0.00121766	0.972337	3.04405e-05	0.00121766	0.0501329
		Hotelling's trace	6.24771	20.305a	4	13	1.69219e-05	0.862025	81.2202	0.999998										Order 5	0.395855	1	0.395855	0.580931	0.450419	0.0143154	0.580931	0.115429													Order 5	1.80326	1	1.80326	6.35111	0.015824	0.137022	6.35111	0.691222
		Roy's largest root	6.24771	20.305a	4	13	1.69219e-05	0.862025	81.2202	0.999998									Filament * Dose	Linear	8.94921	4	2.2373	2.48852	0.0585422	0.199265	9.9541	0.655213												Filament * Dose	Linear	28.4584	4	7.1146	6.97727	0.000232997	0.410977	27.9091	0.988671
		Each F tests the multivariate effect of Dose. These tests are based on the linearly independent pairwise comparisons among the estimated marginal means.																		Quadratic	3.19735	4	0.799339	1.18108	0.333775	0.105632	4.72432	0.335897													Quadratic	1.85291	4	0.463228	0.340314	0.849121	0.0329114	1.36126	0.11883
		a. Exact statistic b. Computed using alpha = .05																		Cubic	0.81358	4	0.203395	0.321103	0.862162	0.0311113	1.28441	0.114503													Cubic	0.95358	4	0.238395	0.24754	0.909461	0.0241561	0.990161	0.0983741
																				Order 4	2.97302	4	0.743254	1.16661	0.33998	0.104473	4.66646	0.331963													Order 4	0.606349	4	0.151587	0.232572	0.918415	0.0227286	0.930289	0.0951818
																				Order 5	3.30388	4	0.82597	1.21214	0.320788	0.10811	4.84856	0.344338													Order 5	1.78801	4	0.447002	1.57435	0.19983	0.13602	6.29738	0.441317
		4. Surgery * Dose																	Error(Filament)	Linear	35.9619	40	0.899048																	Error(Filament)	Linear	40.7873	40	1.01968
																				Quadratic	27.0714	40	0.676786																		Quadratic	54.4471	40	1.36118
		Estimates																		Cubic	25.337	40	0.633426																		Cubic	38.5222	40	0.963056
		Measure:Mechanicalsensitivity																		Order 4	25.4841	40	0.637103																		Order 4	26.0714	40	0.651786
		Surgery	Dose	Mean	Std. Error	95% Confidence Interval														Order 5	27.2566	40	0.681415																		Order 5	11.3571	40	0.283929
						Lower Bound	Upper Bound												a. Computed using alpha = .05																					a. Computed using alpha = .05
		Sham	0	5.43611	0.80434	3.73099	7.14123
			1.25	5.49444	0.691549	4.02843	6.96046												Tests of Between-Subjects Effects																					Tests of Between-Subjects Effects
			2	4.90667	0.633067	3.56462	6.24871												Measure:Mechanicalsensitivity Transformed Variable:Average																					Measure:Mechanicalsensitivity Transformed Variable:Average
			2.5	5.08333	0.376621	4.28493	5.88173												Source	Type III Sum of Squares	df	Mean Square	F	Sig.	Partial Eta Squared	Noncent. Parameter	Observed Powera													Source	Type III Sum of Squares	df	Mean Square	F	Sig.	Partial Eta Squared	Noncent. Parameter	Observed Powera
			5	2.86111	0.469795	1.86519	3.85703												Intercept	1677.51	1	1677.51	285.399	8.28137e-20	0.877074	285.399	1													Intercept	3763.2	1	3763.2	811.553	3.50836e-28	0.953027	811.553	1
		Endo	0	10.2922	0.80434	8.5871	11.9973												Dose	69.2074	4	17.3019	2.9436	0.0318463	0.227418	11.7744	0.738377													Dose	356.652	4	89.163	19.2284	6.83708e-09	0.657867	76.9137	1
			1.25	8.53278	0.691549	7.06676	9.9988												Error	235.111	40	5.87778																		Error	185.481	40	4.63704
			2	6.81278	0.633067	5.47074	8.15482												a. Computed using alpha = .05																					a. Computed using alpha = .05
			2.5	6.25778	0.376621	5.45938	7.05618
			5	3.71833	0.469795	2.72241	4.71425
																			Estimated Marginal Means																					Estimated Marginal Means
		Pairwise Comparisons
		Measure:Mechanicalsensitivity																	1. Grand Mean																					1. Grand Mean
		Dose	(I) Surgery	(J) Surgery	Mean Difference (I-J)	Std. Error	Sig.a	95% Confidence Interval for Differencea											Measure:Mechanicalsensitivity																					Measure:Mechanicalsensitivity
								Lower Bound	Upper Bound										Mean	Std. Error	95% Confidence Interval																			Mean	Std. Error	95% Confidence Interval
		0	Sham	Endo	-4.856*	1.13751	0.000587334	-7.26752	-2.4447												Lower Bound	Upper Bound																				Lower Bound	Upper Bound
			Endo	Sham	4.856*	1.13751	0.000587334	2.4447	7.26752										2.49259	0.147545	2.19439	2.79079																		3.73333	0.13105	3.46847	3.9982
		1.25	Sham	Endo	-3.038*	0.977998	0.0067842	-5.1116	-0.965069
			Endo	Sham	3.038*	0.977998	0.0067842	0.965069	5.1116
		2	Sham	Endo	-1.906*	0.895292	0.049132	-3.80404	-0.00817741										2. Dose																					2. Dose
			Endo	Sham	1.906*	0.895292	0.049132	0.00817741	3.80404
		2.5	Sham	Endo	-1.174*	0.532622	0.0424308	-2.30355	-0.0453363										Estimates																					Estimates
			Endo	Sham	1.174*	0.532622	0.0424308	0.0453363	2.30355										Measure:Frequency of response																					Measure:Frequency of response
		5	Sham	Endo	-0.857222	0.664391	0.215304	-2.26567	0.551223										Dose	Mean	Std. Error	95% Confidence Interval																		Dose	Mean	Std. Error	95% Confidence Interval
			Endo	Sham	0.857222	0.664391	0.215304	-0.551223	2.26567													Lower Bound	Upper Bound																				Lower Bound	Upper Bound
		Based on estimated marginal means																	0	2.85185	0.329921	2.18506	3.51865																	0	5.37037	0.293038	4.77812	5.96262
		*. The mean difference is significant at the .05 level. a. Adjustment for multiple comparisons: Bonferroni.																	1.25	2.83333	0.329921	2.16654	3.50013																	1.25	4.5	0.293038	3.90775	5.09225
																			2	2.57407	0.329921	1.90728	3.24087																	2	3.57407	0.293038	2.98182	4.16633
		Univariate Tests																	2.5	2.7037	0.329921	2.03691	3.3705																	2.5	3.24074	0.293038	2.64849	3.83299
		Measure:Mechanicalsensitivity																	5	1.5	0.329921	0.833205	2.16679																	5	1.98148	0.293038	1.38923	2.57373
		Dose		Sum of Squares	df	Mean Square	F	Sig.	Partial Eta Squared	Noncent. Parameter	Observed Powera
		0	Contrast	106.118	1	106.118	18.225	0.000587334	0.532506	18.225	0.979384								Pairwise Comparisons																					Pairwise Comparisons
			Error	93.1625	16	5.82266													Measure:Frequency of response																					Measure:Frequency of response
		1.25	Contrast	41.5416	1	41.5416	9.65149	0.0067842	0.376255	9.65149	0.830424								(I) Dose	(J) Dose	Mean Difference (I-J)	Std. Error	Sig.a	95% Confidence Interval for Differencea																(I) Dose	(J) Dose	Mean Difference (I-J)	Std. Error	Sig.a	95% Confidence Interval for Differencea
			Error	68.8666	16	4.30416																		Lower Bound	Upper Bound																				Lower Bound	Upper Bound
		2	Contrast	16.3497	1	16.3497	4.53281	0.049132	0.220759	4.53281	0.516246								0	1.25	0.0185185	0.466578	1	-1.36777	1.4048															0	1.25	0.87037	0.414418	0.420612	-0.360936	2.10168
			Error	57.7114	16	3.60696														2	0.277778	0.466578	1	-1.10851	1.66406																2	1.796*	0.414418	0.000958294	0.56499	3.0276
		2.5	Contrast	6.20694	1	6.20694	4.86213	0.0424308	0.23306	4.86213	0.544556									2.5	0.148148	0.466578	1	-1.23814	1.53443																2.5	2.130*	0.414418	7.59907e-05	0.898323	3.36094
			Error	20.4254	16	1.27659														5	1.35185	0.466578	0.0607693	-0.0344327	2.73814																5	3.389*	0.414418	4.55009e-09	2.15758	4.6202
		5	Contrast	3.30673	1	3.30673	1.66471	0.215304	0.0942395	1.66471	0.228482								1	0	-0.0185185	0.466578	1	-1.4048	1.36777															1	0	-0.87037	0.414418	0.420612	-2.10168	0.360936
			Error	31.7819	16	1.98637														2	0.259259	0.466578	1	-1.12703	1.64554																2	0.925926	0.414418	0.311194	-0.30538	2.15723
		Each F tests the simple effects of Surgery within each level combination of the other effects shown. These tests are based on the linearly independent pairwise comparisons among the estimated marginal means.																		2.5	0.12963	0.466578	1	-1.25665	1.51591																2.5	1.259*	0.414418	0.041748	0.027953	2.49057
		a. Computed using alpha = .05																		5	1.33333	0.466578	0.0674225	-0.0529512	2.71962																5	2.519*	0.414418	3.68059e-06	1.28721	3.74982
																			2	0	-0.277778	0.466578	1	-1.66406	1.10851															2	0	-1.796*	0.414418	0.000958294	-3.0276	-0.56499
																				1.25	-0.259259	0.466578	1	-1.64554	1.12703																1.25	-0.925926	0.414418	0.311194	-2.15723	0.30538
		5. Surgery * Dose																		2.5	-0.12963	0.466578	1	-1.51591	1.25665																2.5	0.333333	0.414418	1	-0.897973	1.56464
																				5	1.07407	0.466578	0.266195	-0.31221	2.46036																5	1.593*	0.414418	0.0042537	0.361286	2.8239
		Estimates																	3	0	-0.148148	0.466578	1	-1.53443	1.23814															3	0	-2.130*	0.414418	7.59907e-05	-3.36094	-0.898323
		Measure:Mechanicalsensitivity																		1.25	-0.12963	0.466578	1	-1.51591	1.25665																1.25	-1.259*	0.414418	0.041748	-2.49057	-0.027953
		Surgery	Dose	Mean	Std. Error	95% Confidence Interval														2	0.12963	0.466578	1	-1.25665	1.51591																2	-0.333333	0.414418	1	-1.56464	0.897973
						Lower Bound	Upper Bound													5	1.2037	0.466578	0.136636	-0.182581	2.58999																5	1.259*	0.414418	0.041748	0.027953	2.49057
		Sham	0	5.43611	0.80434	3.73099	7.14123												5	0	-1.35185	0.466578	0.0607693	-2.73814	0.0344327															5	0	-3.389*	0.414418	4.55009e-09	-4.6202	-2.15758
			1.25	5.49444	0.691549	4.02843	6.96046													1.25	-1.33333	0.466578	0.0674225	-2.71962	0.0529512																1.25	-2.519*	0.414418	3.68059e-06	-3.74982	-1.28721
			2	4.90667	0.633067	3.56462	6.24871													2	-1.07407	0.466578	0.266195	-2.46036	0.31221																2	-1.593*	0.414418	0.0042537	-2.8239	-0.361286
			2.5	5.08333	0.376621	4.28493	5.88173													2.5	-1.2037	0.466578	0.136636	-2.58999	0.182581																2.5	-1.259*	0.414418	0.041748	-2.49057	-0.027953
			5	2.86111	0.469795	1.86519	3.85703												Based on estimated marginal means																					Based on estimated marginal means
		Endo	0	10.2922	0.80434	8.5871	11.9973												a. Adjustment for multiple comparisons: Bonferroni.																					a. Adjustment for multiple comparisons: Bonferroni. *. The mean difference is significant at the .05 level.
			1.25	8.53278	0.691549	7.06676	9.9988
			2	6.81278	0.633067	5.47074	8.15482												Univariate Tests																					Univariate Tests
			2.5	6.25778	0.376621	5.45938	7.05618												Measure:Mechanicalsensitivity																					Measure:Mechanicalsensitivity
			5	3.71833	0.469795	2.72241	4.71425													Sum of Squares	df	Mean Square	F	Sig.	Partial Eta Squared	Noncent. Parameter	Observed Powera														Sum of Squares	df	Mean Square	F	Sig.	Partial Eta Squared	Noncent. Parameter	Observed Powera
																			Contrast	11.5346	4	2.88364	2.9436	0.0318463	0.227418	11.7744	0.738377													Contrast	59.442	4	14.8605	19.2284	6.83708e-09	0.657867	76.9137	1
		Pairwise Comparisons																	Error	39.1852	40	0.97963																		Error	30.9136	40	0.77284
		Measure:Mechanicalsensitivity																	The F tests the effect of Dose. This test is based on the linearly independent pairwise comparisons among the estimated marginal means.																					The F tests the effect of Dose. This test is based on the linearly independent pairwise comparisons among the estimated marginal means.
		Surgery	(I) Dose	(J) Dose	Mean Difference (I-J)	Std. Error	Sig.a	95% Confidence Interval for Differencea											a. Computed using alpha = .05																					a. Computed using alpha = .05
								Lower Bound	Upper Bound
		Sham	0	1.25	-0.0583333	0.669777	1	-2.23644	2.11978
				2	0.529444	0.607916	1	-1.44749	2.50638										3. Filament																					3. Filament
				2.5	0.352778	0.556	1	-1.45533	2.16089
				5	2.575*	0.712725	0.0233475	0.257222	4.89278										Estimates																					Estimates
			1.25	0	0.0583333	0.669777	1	-2.11978	2.23644										Measure:Mechanicalsensitivity																					Measure:Mechanicalsensitivity
				2	0.587778	0.3922	1	-0.687654	1.86321										Filament	Mean	Std. Error	95% Confidence Interval																		Filament	Mean	Std. Error	95% Confidence Interval
				2.5	0.411111	0.570717	1	-1.44486	2.26708													Lower Bound	Upper Bound																				Lower Bound	Upper Bound
				5	2.633*	0.694981	0.0160942	0.373259	4.89341										1	1.28889	0.179505	0.926095	1.65168																	1	2.11111	0.151535	1.80485	2.41738
			2	0	-0.529444	0.607916	1	-2.50638	1.44749										2	2	0.20367	1.58837	2.41163																	2	3.02222	0.197203	2.62366	3.42078
				1.25	-0.587778	0.3922	1	-1.86321	0.687654										3	2.24444	0.19341	1.85355	2.63534																	3	3.82222	0.204577	3.40876	4.23569
				2.5	-0.176667	0.539778	1	-1.93202	1.57869										4	2.73333	0.17533	2.37898	3.08769																	4	3.97778	0.198762	3.57607	4.37949
				5	2.046*	0.628457	0.0496967	0.00181673	4.08929										5	3.13333	0.17533	2.77898	3.48769																	5	4.53333	0.172491	4.18472	4.88195
			2.5	0	-0.352778	0.556	1	-2.16089	1.45533										6	3.55556	0.19084	3.16985	3.94126																	6	4.93333	0.158698	4.61259	5.25407
				1.25	-0.411111	0.570717	1	-2.26708	1.44486
				2	0.176667	0.539778	1	-1.57869	1.93202										Pairwise Comparisons																					Pairwise Comparisons
				5	2.222*	0.513119	0.00516431	0.553563	3.89088										Measure:Mechanicalsensitivity																					Measure:Mechanicalsensitivity
			5	1.25	-2.575*	0.712725	0.0233475	-4.89278	-0.257222										(I) Filament	(J) Filament	Mean Difference (I-J)	Std. Error	Sig.a	95% Confidence Interval for Differencea																(I) Filament	(J) Filament	Mean Difference (I-J)	Std. Error	Sig.a	95% Confidence Interval for Differencea
				2	-2.633*	0.694981	0.0160942	-4.89341	-0.373259															Lower Bound	Upper Bound																				Lower Bound	Upper Bound
				2.5	-2.046*	0.628457	0.0496967	-4.08929	-0.00181673										1	2	-.711*	0.181897	0.00523431	-1.27896	-0.143265															1	2	-.911*	0.217732	0.00227845	-1.59083	-0.231393
				5	-2.222*	0.513119	0.00516431	-3.89088	-0.553563											3	-.956*	0.171774	2.91497e-05	-1.4918	-0.419312																3	-1.711*	0.244444	2.8132e-07	-2.47422	-0.948004
		Endo	0	1.25	1.75944	0.669777	0.183109	-0.418666	3.93756											4	-1.444*	0.162542	7.77114e-10	-1.95187	-0.937022																4	-1.867*	0.239083	2.16567e-08	-2.61304	-1.1203
				2	3.479*	0.607916	0.000313925	1.50251	5.45638											5	-1.844*	0.180534	1.55591e-11	-2.40804	-1.28085																5	-2.422*	0.202149	1.22928e-13	-3.05329	-1.79115
				2.5	4.034*	0.556	1.92026e-05	2.22634	5.84255											6	-2.267*	0.187248	8.91045e-14	-2.85122	-1.68212																6	-2.822*	0.209054	2.62756e-15	-3.47485	-2.1696
				5	6.574*	0.712725	8.35416e-07	4.25611	8.89167										2	1	.711*	0.181897	0.00523431	0.143265	1.27896															2	1	.911*	0.217732	0.00227845	0.231393	1.59083
			1.25	0	-1.75944	0.669777	0.183109	-3.93756	0.418666											3	-0.244444	0.205781	1	-0.886851	0.397962																3	-.800*	0.177082	0.000814012	-1.35282	-0.247185
				2	1.720*	0.3922	0.00460898	0.444568	2.99543											4	-.733*	0.185924	0.00471607	-1.31375	-0.152914																4	-.956*	0.200308	0.000368029	-1.58088	-0.330232
				2.5	2.275*	0.570717	0.0106238	0.419032	4.13097											5	-1.133*	0.185259	4.84543e-06	-1.71168	-0.55499																5	-1.511*	0.197515	3.55019e-08	-2.12772	-0.894507
				5	4.814*	0.694981	3.40356e-05	2.55437	7.07452											6	-1.556*	0.199382	2.20498e-08	-2.17799	-0.933125																6	-1.911*	0.203973	1.83118e-10	-2.54787	-1.27435
			2	0	-3.479*	0.607916	0.000313925	-5.45638	-1.50251										3	1	.956*	0.171774	2.91497e-05	0.419312	1.4918															3	1	1.711*	0.244444	2.8132e-07	0.948004	2.47422
				1.25	-1.720*	0.3922	0.00460898	-2.99543	-0.444568											2	0.244444	0.205781	1	-0.397962	0.886851																2	.800*	0.177082	0.000814012	0.247185	1.35282
				2.5	0.555	0.539778	1	-1.20035	2.31035											4	-0.488889	0.17033	0.0978702	-1.02063	0.0428483																4	-0.155556	0.134256	1	-0.574677	0.263566
				5	3.094*	0.628457	0.00152635	1.05071	5.13818											5	-.889*	0.152753	1.27314e-05	-1.36575	-0.412026																5	-.711*	0.186587	0.00701206	-1.2936	-0.128622
			2.5	0	-4.034*	0.556	1.92026e-05	-5.84255	-2.22634											6	-1.311*	0.189867	3.81033e-07	-1.90384	-0.718384																6	-1.111*	0.178471	3.41396e-06	-1.66826	-0.55396
				1.25	-2.275*	0.570717	0.0106238	-4.13097	-0.419032										4	1	1.444*	0.162542	7.77114e-10	0.937022	1.95187															4	1	1.867*	0.239083	2.16567e-08	1.1203	2.61304
				2	-0.555	0.539778	1	-2.31035	1.20035											2	.733*	0.185924	0.00471607	0.152914	1.31375																2	.956*	0.200308	0.000368029	0.330232	1.58088
				5	2.539*	0.513119	0.00145057	0.870785	4.2081											3	0.488889	0.17033	0.0978702	-0.0428483	1.02063																3	0.155556	0.134256	1	-0.263566	0.574677
			5	1.25	-6.574*	0.712725	8.35416e-07	-8.89167	-4.25611											5	-0.4	0.12862	0.0516422	-0.801528	0.00152766																5	-.556*	0.143587	0.00590308	-1.00381	-0.107305
				2	-4.814*	0.694981	3.40356e-05	-7.07452	-2.55437											6	-.822*	0.173205	0.000396153	-1.36293	-0.28151																6	-.956*	0.186587	0.000120597	-1.53804	-0.373067
				2.5	-3.094*	0.628457	0.00152635	-5.13818	-1.05071										5	1	1.844*	0.180534	1.55591e-11	1.28085	2.40804															5	1	2.422*	0.202149	1.22928e-13	1.79115	3.05329
				5	-2.539*	0.513119	0.00145057	-4.2081	-0.870785											2	1.133*	0.185259	4.84543e-06	0.55499	1.71168																2	1.511*	0.197515	3.55019e-08	0.894507	2.12772
		Based on estimated marginal means																		3	.889*	0.152753	1.27314e-05	0.412026	1.36575																3	.711*	0.186587	0.00701206	0.128622	1.2936
		a. Adjustment for multiple comparisons: Bonferroni. *. The mean difference is significant at the .05 level.																		4	0.4	0.12862	0.0516422	-0.00152766	0.801528																4	.556*	0.143587	0.00590308	0.107305	1.00381
																				6	-0.422222	0.166667	0.229823	-0.942523	0.0980784																6	-0.4	0.171774	0.375253	-0.936243	0.136243
		Multivariate Tests																	6	1	2.267*	0.187248	8.91045e-14	1.68212	2.85122															6	1	2.822*	0.209054	2.62756e-15	2.1696	3.47485
		Surgery		Value	F	Hypothesis df	Error df	Sig.	Partial Eta Squared	Noncent. Parameter	Observed Powerb									2	1.556*	0.199382	2.20498e-08	0.933125	2.17799																2	1.911*	0.203973	1.83118e-10	1.27435	2.54787
		Sham	Pillai's trace	0.577218	4.437a	4	13	0.0176452	0.577218	17.7487	0.816047									3	1.311*	0.189867	3.81033e-07	0.718384	1.90384																3	1.111*	0.178471	3.41396e-06	0.55396	1.66826
			Wilks' lambda	0.422782	4.437a	4	13	0.0176452	0.577218	17.7487	0.816047									4	.822*	0.173205	0.000396153	0.28151	1.36293																4	.956*	0.186587	0.000120597	0.373067	1.53804
			Hotelling's trace	1.36528	4.437a	4	13	0.0176452	0.577218	17.7487	0.816047									5	0.422222	0.166667	0.229823	-0.0980784	0.942523																5	0.4	0.171774	0.375253	-0.136243	0.936243
			Roy's largest root	1.36528	4.437a	4	13	0.0176452	0.577218	17.7487	0.816047								Based on estimated marginal means																					Based on estimated marginal means
		Endo	Pillai's trace	0.86983	21.717a	4	13	1.1679e-05	0.86983	86.8691	0.999999								*. The mean difference is significant at the .05 level. a. Adjustment for multiple comparisons: Bonferroni.																					*. The mean difference is significant at the .05 level. a. Adjustment for multiple comparisons: Bonferroni.
			Wilks' lambda	0.13017	21.717a	4	13	1.1679e-05	0.86983	86.8691	0.999999
			Hotelling's trace	6.68224	21.717a	4	13	1.1679e-05	0.86983	86.8691	0.999999								Multivariate Tests																					Multivariate Tests
			Roy's largest root	6.68224	21.717a	4	13	1.1679e-05	0.86983	86.8691	0.999999									Value	F	Hypothesis df	Error df	Sig.	Partial Eta Squared	Noncent. Parameter	Observed Powerb														Value	F	Hypothesis df	Error df	Sig.	Partial Eta Squared	Noncent. Parameter	Observed Powerb
		Each F tests the multivariate simple effects of Dose within each level combination of the other effects shown. These tests are based on the linearly independent pairwise comparisons among the estimated marginal means.																	Pillai's trace	0.812267	31.152a	5	36	3.97272e-12	0.812267	155.762	1													Pillai's trace	0.860818	44.531a	5	36	1.97394e-14	0.860818	222.653	1
		a. Exact statistic b. Computed using alpha = .05																	Wilks' lambda	0.187733	31.152a	5	36	3.97272e-12	0.812267	155.762	1													Wilks' lambda	0.139182	44.531a	5	36	1.97394e-14	0.860818	222.653	1
																			Hotelling's trace	4.32672	31.152a	5	36	3.97272e-12	0.812267	155.762	1													Hotelling's trace	6.18482	44.531a	5	36	1.97394e-14	0.860818	222.653	1
																			Roy's largest root	4.32672	31.152a	5	36	3.97272e-12	0.812267	155.762	1													Roy's largest root	6.18482	44.531a	5	36	1.97394e-14	0.860818	222.653	1
																			Each F tests the multivariate effect of Filament. These tests are based on the linearly independent pairwise comparisons among the estimated marginal means.																					Each F tests the multivariate effect of Filament. These tests are based on the linearly independent pairwise comparisons among the estimated marginal means.
																			a. Exact statistic b. Computed using alpha = .05																					a. Exact statistic b. Computed using alpha = .05
																			4. Dose * Filament																					4. Dose * Filament
																			Estimates																					Estimates
																			Measure:Mechanicalsensitivity																					Measure:Mechanicalsensitivity
																			Dose	Filament	Mean	Std. Error	95% Confidence Interval																	Dose	Filament	Mean	Std. Error	95% Confidence Interval
																							Lower Bound	Upper Bound																				Lower Bound	Upper Bound
																			0	1	1.66667	0.401386	0.855434	2.4779																0	1	3.11111	0.338843	2.42628	3.79594
																				2	2.11111	0.45542	1.19067	3.03155																	2	4.33333	0.440959	3.44212	5.22454
																				3	2.22222	0.432478	1.34815	3.09629																	3	5.44444	0.457449	4.51991	6.36898
																				4	2.88889	0.392051	2.09652	3.68125																	4	5.88889	0.444444	4.99063	6.78714
																				5	3.88889	0.392051	3.09652	4.68125																	5	6.55556	0.385701	5.77602	7.33509
																				6	4.33333	0.42673	3.47088	5.19579																	6	6.88889	0.35486	6.17169	7.60609
																			1.25	1	1.44444	0.401386	0.633212	2.25568																1.25	1	2.22222	0.338843	1.53739	2.90705
																				2	2.66667	0.45542	1.74623	3.5871																	2	3.44444	0.440959	2.55323	4.33565
																				3	2.33333	0.432478	1.45926	3.2074																	3	4.66667	0.457449	3.74213	5.5912
																				4	3.22222	0.392051	2.42986	4.01459																	4	4.55556	0.444444	3.6573	5.45381
																				5	3.55556	0.392051	2.76319	4.34792																	5	5.88889	0.385701	5.10936	6.66842
																				6	3.77778	0.42673	2.91532	4.64023																	6	6.22222	0.35486	5.50502	6.93942
																			2	1	1.44444	0.401386	0.633212	2.25568																2	1	2	0.338843	1.31517	2.68483
																				2	2.11111	0.45542	1.19067	3.03155																	2	3	0.440959	2.10879	3.89121
																				3	2.33333	0.432478	1.45926	3.2074																	3	3.77778	0.457449	2.85324	4.70232
																				4	2.88889	0.392051	2.09652	3.68125																	4	3.88889	0.444444	2.99063	4.78714
																				5	3	0.392051	2.20764	3.79236																	5	4.11111	0.385701	3.33158	4.89064
																				6	3.66667	0.42673	2.80421	4.52912																	6	4.66667	0.35486	3.94947	5.38387
																			2.5	1	1.22222	0.401386	0.41099	2.03345																2.5	1	2.33333	0.338843	1.64851	3.01816
																				2	2	0.45542	1.07956	2.92044																	2	2.77778	0.440959	1.88657	3.66899
																				3	2.77778	0.432478	1.90371	3.65185																	3	3.22222	0.457449	2.29768	4.14676
																				4	2.66667	0.392051	1.8743	3.45903																	4	3.44444	0.444444	2.54619	4.3427
																				5	3.55556	0.392051	2.76319	4.34792																	5	3.77778	0.385701	2.99825	4.55731
																				6	4	0.42673	3.13755	4.86245																	6	3.88889	0.35486	3.17169	4.60609
																			5	1	0.666667	0.401386	-0.144566	1.4779																5	1	0.888889	0.338843	0.204061	1.57372
																				2	1.11111	0.45542	0.190673	2.03155																	2	1.55556	0.440959	0.664345	2.44677
																				3	1.55556	0.432478	0.681485	2.42963																	3	2	0.457449	1.07546	2.92454
																				4	2	0.392051	1.20764	2.79236																	4	2.11111	0.444444	1.21286	3.00937
																				5	1.66667	0.392051	0.874303	2.45903																	5	2.33333	0.385701	1.5538	3.11286
																				6	2	0.42673	1.13755	2.86245																	6	3	0.35486	2.2828	3.7172
																			Pairwise Comparisons																					Pairwise Comparisons
																			Measure:Mechanicalsensitivity																					Measure:Mechanicalsensitivity
																			Dose	(I) Filament	(J) Filament	Mean Difference (I-J)	Std. Error	Sig.a	95% Confidence Interval for Differencea															Dose	(I) Filament	(J) Filament	Mean Difference (I-J)	Std. Error	Sig.a	95% Confidence Interval for Differencea
																									Lower Bound	Upper Bound																				Lower Bound	Upper Bound
																			0	1	2	-0.444444	0.406733	1	-1.71419	0.825298														0	1	2	-1.22222	0.486864	0.243074	-2.74212	0.297673
																					3	-0.555556	0.384097	1	-1.75463	0.643521																3	-2.333*	0.546594	0.00175961	-4.03969	-0.626973
																					4	-1.222*	0.363454	0.025643	-2.35685	-0.0875904																4	-2.778*	0.534605	9.49354e-05	-4.44671	-1.10885
																					5	-2.222*	0.403687	3.51557e-05	-3.48245	-0.961992																5	-3.444*	0.452019	3.90849e-08	-4.85556	-2.03333
																					6	-2.667*	0.418699	2.14809e-06	-3.97376	-1.35957																6	-3.778*	0.46746	9.19709e-09	-5.23709	-2.31846
																				2	1	0.444444	0.406733	1	-0.825298	1.71419															2	1	1.22222	0.486864	0.243074	-0.297673	2.74212
																					3	-0.111111	0.46014	1	-1.54758	1.32535																3	-1.11111	0.395967	0.115639	-2.34724	0.125021
																					4	-0.777778	0.41574	1	-2.07564	0.52008																4	-1.556*	0.447903	0.0187613	-2.95382	-0.15729
																					5	-1.778*	0.414252	0.00164105	-3.07099	-0.484564																5	-2.222*	0.441658	0.000160606	-3.60099	-0.843453
																					6	-2.222*	0.445831	0.000186623	-3.61402	-0.830425																6	-2.556*	0.456097	2.56e-05	-3.9794	-1.13171
																				3	1	0.555556	0.384097	1	-0.643521	1.75463															3	1	2.333*	0.546594	0.00175961	0.626973	4.03969
																					2	0.111111	0.46014	1	-1.32535	1.54758																2	1.11111	0.395967	0.115639	-0.125021	2.34724
																					4	-0.666667	0.38087	1	-1.85567	0.522334																4	-0.444444	0.300206	1	-1.38163	0.492739
																					5	-1.667*	0.341565	0.000260542	-2.73297	-0.600368																5	-1.11111	0.417222	0.16651	-2.4136	0.191374
																					6	-2.111*	0.424555	0.000193844	-3.43649	-0.785734																6	-1.444*	0.399073	0.0123023	-2.69027	-0.198617
																				4	1	1.222*	0.363454	0.025643	0.0875904	2.35685															4	1	2.778*	0.534605	9.49354e-05	1.10885	4.44671
																					2	0.777778	0.41574	1	-0.52008	2.07564																2	1.556*	0.447903	0.0187613	0.15729	2.95382
																					3	0.666667	0.38087	1	-0.522334	1.85567																3	0.444444	0.300206	1	-0.492739	1.38163
																					5	-1.000*	0.287604	0.0185465	-1.89784	-0.102157																5	-0.666667	0.321071	0.664906	-1.66899	0.335653
																					6	-1.444*	0.387298	0.00892047	-2.65351	-0.235375																6	-1	0.417222	0.319529	-2.30248	0.302485
																				5	1	2.222*	0.403687	3.51557e-05	0.961992	3.48245															5	1	3.444*	0.452019	3.90849e-08	2.03333	4.85556
																					2	1.778*	0.414252	0.00164105	0.484564	3.07099																2	2.222*	0.441658	0.000160606	0.843453	3.60099
																					3	1.667*	0.341565	0.000260542	0.600368	2.73297																3	1.11111	0.417222	0.16651	-0.191374	2.4136
																					4	1.000*	0.287604	0.0185465	0.102157	1.89784																4	0.666667	0.321071	0.664906	-0.335653	1.66899
																					6	-0.444444	0.372678	1	-1.60787	0.718983																6	-0.333333	0.384097	1	-1.53241	0.865744
																				6	1	2.667*	0.418699	2.14809e-06	1.35957	3.97376															6	1	3.778*	0.46746	9.19709e-09	2.31846	5.23709
																					2	2.222*	0.445831	0.000186623	0.830425	3.61402																2	2.556*	0.456097	2.56e-05	1.13171	3.9794
																					3	2.111*	0.424555	0.000193844	0.785734	3.43649																3	1.444*	0.399073	0.0123023	0.198617	2.69027
																					4	1.444*	0.387298	0.00892047	0.235375	2.65351																4	1	0.417222	0.319529	-0.302485	2.30248
																					5	0.444444	0.372678	1	-0.718983	1.60787																5	0.333333	0.384097	1	-0.865744	1.53241
																			1.25	1	2	-1.22222	0.406733	0.0685353	-2.49196	0.0475197														1.25	1	2	-1.22222	0.486864	0.243074	-2.74212	0.297673
																					3	-0.888889	0.384097	0.388106	-2.08797	0.310188																3	-2.444*	0.546594	0.000938174	-4.1508	-0.738084
																					4	-1.778*	0.363454	0.000250931	-2.91241	-0.643146																4	-2.333*	0.534605	0.00130982	-4.00227	-0.664402
																					5	-2.111*	0.403687	8.52292e-05	-3.37134	-0.85088																5	-3.667*	0.452019	8.37085e-09	-5.07778	-2.25555
																					6	-2.333*	0.418699	2.82288e-05	-3.64043	-1.02624																6	-4.000*	0.46746	2.11914e-09	-5.45932	-2.54068
																				2	1	1.22222	0.406733	0.0685353	-0.0475197	2.49196															2	1	1.22222	0.486864	0.243074	-0.297673	2.74212
																					3	0.333333	0.46014	1	-1.10313	1.7698																3	-1.22222	0.395967	0.0550057	-2.45835	0.01391
																					4	-0.555556	0.41574	1	-1.85341	0.742302																4	-1.11111	0.447903	0.261266	-2.50938	0.287155
																					5	-0.888889	0.414252	0.570205	-2.1821	0.404325																5	-2.444*	0.441658	3.19248e-05	-3.82321	-1.06568
																					6	-1.11111	0.445831	0.254062	-2.50291	0.280686																6	-2.778*	0.456097	5.29207e-06	-4.20162	-1.35393
																				3	1	0.888889	0.384097	0.388106	-0.310188	2.08797															3	1	2.444*	0.546594	0.000938174	0.738084	4.1508
																					2	-0.333333	0.46014	1	-1.7698	1.10313																2	1.22222	0.395967	0.0550057	-0.01391	2.45835
																					4	-0.888889	0.38087	0.370718	-2.07789	0.300112																4	0.111111	0.300206	1	-0.826072	1.04829
																					5	-1.222*	0.341565	0.0138621	-2.28852	-0.155923																5	-1.22222	0.417222	0.0837733	-2.52471	0.0802625
																					6	-1.444*	0.424555	0.0229394	-2.76982	-0.119067																6	-1.556*	0.399073	0.00541723	-2.80138	-0.309728
																				4	1	1.778*	0.363454	0.000250931	0.643146	2.91241															4	1	2.333*	0.534605	0.00130982	0.664402	4.00227
																					2	0.555556	0.41574	1	-0.742302	1.85341																2	1.11111	0.447903	0.261266	-0.287155	2.50938
																					3	0.888889	0.38087	0.370718	-0.300112	2.07789																3	-0.111111	0.300206	1	-1.04829	0.826072
																					5	-0.333333	0.287604	1	-1.23118	0.56451																5	-1.333*	0.321071	0.00251047	-2.33565	-0.331014
																					6	-0.555556	0.387298	1	-1.76462	0.653514																6	-1.667*	0.417222	0.00405313	-2.96915	-0.364182
																				5	1	2.111*	0.403687	8.52292e-05	0.85088	3.37134															5	1	3.667*	0.452019	8.37085e-09	2.25555	5.07778
																					2	0.888889	0.414252	0.570205	-0.404325	2.1821																2	2.444*	0.441658	3.19248e-05	1.06568	3.82321
																					3	1.222*	0.341565	0.0138621	0.155923	2.28852																3	1.22222	0.417222	0.0837733	-0.0802625	2.52471
																					4	0.333333	0.287604	1	-0.56451	1.23118																4	1.333*	0.321071	0.00251047	0.331014	2.33565
																					6	-0.222222	0.372678	1	-1.38565	0.941205																6	-0.333333	0.384097	1	-1.53241	0.865744
																				6	1	2.333*	0.418699	2.82288e-05	1.02624	3.64043															6	1	4.000*	0.46746	2.11914e-09	2.54068	5.45932
																					2	1.11111	0.445831	0.254062	-0.280686	2.50291																2	2.778*	0.456097	5.29207e-06	1.35393	4.20162
																					3	1.444*	0.424555	0.0229394	0.119067	2.76982																3	1.556*	0.399073	0.00541723	0.309728	2.80138
																					4	0.555556	0.387298	1	-0.653514	1.76462																4	1.667*	0.417222	0.00405313	0.364182	2.96915
																					5	0.222222	0.372678	1	-0.941205	1.38565																5	0.333333	0.384097	1	-0.865744	1.53241
																			2	1	2	-0.666667	0.406733	1	-1.93641	0.603075														2	1	2	-1	0.486864	0.698333	-2.5199	0.519895
																					3	-0.888889	0.384097	0.388106	-2.08797	0.310188																3	-1.778*	0.546594	0.03491	-3.48414	-0.0714174
																					4	-1.444*	0.363454	0.00431044	-2.57908	-0.309813																4	-1.889*	0.534605	0.0157852	-3.55782	-0.219957
																					5	-1.556*	0.403687	0.00618618	-2.81579	-0.295325																5	-2.111*	0.452019	0.000504441	-3.52223	-0.699997
																					6	-2.222*	0.418699	6.63739e-05	-3.52932	-0.915127																6	-2.667*	0.46746	1.84414e-05	-4.12598	-1.20735
																				2	1	0.666667	0.406733	1	-0.603075	1.93641															2	1	1	0.486864	0.698333	-0.519895	2.5199
																					3	-0.222222	0.46014	1	-1.65869	1.21424																3	-0.777778	0.395967	0.847144	-2.01391	0.458354
																					4	-0.777778	0.41574	1	-2.07564	0.52008																4	-0.888889	0.447903	0.811246	-2.28715	0.509377
																					5	-0.888889	0.414252	0.570205	-2.1821	0.404325																5	-1.11111	0.441658	0.239906	-2.48988	0.267658
																					6	-1.556*	0.445831	0.0179154	-2.94735	-0.163758																6	-1.667*	0.456097	0.0111212	-3.09051	-0.242821
																				3	1	0.888889	0.384097	0.388106	-0.310188	2.08797															3	1	1.778*	0.546594	0.03491	0.0714174	3.48414
																					2	0.222222	0.46014	1	-1.21424	1.65869																2	0.777778	0.395967	0.847144	-0.458354	2.01391
																					4	-0.555556	0.38087	1	-1.74456	0.633445																4	-0.111111	0.300206	1	-1.04829	0.826072
																					5	-0.666667	0.341565	0.869818	-1.73297	0.399632																5	-0.333333	0.417222	1	-1.63582	0.969151
																					6	-1.333*	0.424555	0.0475089	-2.65871	-0.00795612																6	-0.888889	0.399073	0.474203	-2.13472	0.356939
																				4	1	1.444*	0.363454	0.00431044	0.309813	2.57908															4	1	1.889*	0.534605	0.0157852	0.219957	3.55782
																					2	0.777778	0.41574	1	-0.52008	2.07564																2	0.888889	0.447903	0.811246	-0.509377	2.28715
																					3	0.555556	0.38087	1	-0.633445	1.74456																3	0.111111	0.300206	1	-0.826072	1.04829
																					5	-0.111111	0.287604	1	-1.00895	0.786732																5	-0.222222	0.321071	1	-1.22454	0.780098
																					6	-0.777778	0.387298	0.771095	-1.98685	0.431292																6	-0.777778	0.417222	1	-2.08026	0.524707
																				5	1	1.556*	0.403687	0.00618618	0.295325	2.81579															5	1	2.111*	0.452019	0.000504441	0.699997	3.52223
																					2	0.888889	0.414252	0.570205	-0.404325	2.1821																2	1.11111	0.441658	0.239906	-0.267658	2.48988
																					3	0.666667	0.341565	0.869818	-0.399632	1.73297																3	0.333333	0.417222	1	-0.969151	1.63582
																					4	0.111111	0.287604	1	-0.786732	1.00895																4	0.222222	0.321071	1	-0.780098	1.22454
																					6	-0.666667	0.372678	1	-1.83009	0.496761																6	-0.555556	0.384097	1	-1.75463	0.643521
																				6	1	2.222*	0.418699	6.63739e-05	0.915127	3.52932															6	1	2.667*	0.46746	1.84414e-05	1.20735	4.12598
																					2	1.556*	0.445831	0.0179154	0.163758	2.94735																2	1.667*	0.456097	0.0111212	0.242821	3.09051
																					3	1.333*	0.424555	0.0475089	0.00795612	2.65871																3	0.888889	0.399073	0.474203	-0.356939	2.13472
																					4	0.777778	0.387298	0.771095	-0.431292	1.98685																4	0.777778	0.417222	1	-0.524707	2.08026
																					5	0.666667	0.372678	1	-0.496761	1.83009																5	0.555556	0.384097	1	-0.643521	1.75463
																			2.5	1	2	-0.777778	0.406733	0.94536	-2.04752	0.491964														2.5	1	2	-0.444444	0.486864	1	-1.96434	1.07545
																					3	-1.556*	0.384097	0.00343102	-2.75463	-0.356479																3	-0.888889	0.546594	1	-2.59525	0.817471
																					4	-1.444*	0.363454	0.00431044	-2.57908	-0.309813																4	-1.11111	0.534605	0.662005	-2.78004	0.557821
																					5	-2.333*	0.403687	1.44476e-05	-3.59356	-1.0731																5	-1.444*	0.452019	0.0408585	-2.85556	-0.0333305
																					6	-2.778*	0.418699	9.11733e-07	-4.08487	-1.47068																6	-1.556*	0.46746	0.0283028	-3.01487	-0.0962383
																				2	1	0.777778	0.406733	0.94536	-0.491964	2.04752															2	1	0.444444	0.486864	1	-1.07545	1.96434
																					3	-0.777778	0.46014	1	-2.21424	0.658687																3	-0.444444	0.395967	1	-1.68058	0.791688
																					4	-0.666667	0.41574	1	-1.96452	0.631191																4	-0.666667	0.447903	1	-2.06493	0.731599
																					5	-1.556*	0.414252	0.00827453	-2.84877	-0.262341																5	-1	0.441658	0.43582	-2.37877	0.378769
																					6	-2.000*	0.445831	0.000898523	-3.3918	-0.608203																6	-1.11111	0.456097	0.290894	-2.53496	0.312735
																				3	1	1.556*	0.384097	0.00343102	0.356479	2.75463															3	1	0.888889	0.546594	1	-0.817471	2.59525
																					2	0.777778	0.46014	1	-0.658687	2.21424																2	0.444444	0.395967	1	-0.791688	1.68058
																					4	0.111111	0.38087	1	-1.07789	1.30011																4	-0.222222	0.300206	1	-1.15941	0.714961
																					5	-0.777778	0.341565	0.423036	-1.84408	0.288521																5	-0.555556	0.417222	1	-1.85804	0.746929
																					6	-1.22222	0.424555	0.0956957	-2.5476	0.103155																6	-0.666667	0.399073	1	-1.91249	0.579161
																				4	1	1.444*	0.363454	0.00431044	0.309813	2.57908															4	1	1.11111	0.534605	0.662005	-0.557821	2.78004
																					2	0.666667	0.41574	1	-0.631191	1.96452																2	0.666667	0.447903	1	-0.731599	2.06493
																					3	-0.111111	0.38087	1	-1.30011	1.07789																3	0.222222	0.300206	1	-0.714961	1.15941
																					5	-0.888889	0.287604	0.0544134	-1.78673	0.00895426																5	-0.333333	0.321071	1	-1.33565	0.668986
																					6	-1.333*	0.387298	0.0204548	-2.5424	-0.124264																6	-0.444444	0.417222	1	-1.74693	0.85804
																				5	1	2.333*	0.403687	1.44476e-05	1.0731	3.59356															5	1	1.444*	0.452019	0.0408585	0.0333305	2.85556
																					2	1.556*	0.414252	0.00827453	0.262341	2.84877																2	1	0.441658	0.43582	-0.378769	2.37877
																					3	0.777778	0.341565	0.423036	-0.288521	1.84408																3	0.555556	0.417222	1	-0.746929	1.85804
																					4	0.888889	0.287604	0.0544134	-0.00895426	1.78673																4	0.333333	0.321071	1	-0.668986	1.33565
																					6	-0.444444	0.372678	1	-1.60787	0.718983																6	-0.111111	0.384097	1	-1.31019	1.08797
																				6	1	2.778*	0.418699	9.11733e-07	1.47068	4.08487															6	1	1.556*	0.46746	0.0283028	0.0962383	3.01487
																					2	2.000*	0.445831	0.000898523	0.608203	3.3918																2	1.11111	0.456097	0.290894	-0.312735	2.53496
																					3	1.22222	0.424555	0.0956957	-0.103155	2.5476																3	0.666667	0.399073	1	-0.579161	1.91249
																					4	1.333*	0.387298	0.0204548	0.124264	2.5424																4	0.444444	0.417222	1	-0.85804	1.74693
																					5	0.444444	0.372678	1	-0.718983	1.60787																5	0.111111	0.384097	1	-1.08797	1.31019
																			5	1	2	-0.444444	0.406733	1	-1.71419	0.825298														5	1	2	-0.666667	0.486864	1	-2.18656	0.853229
																					3	-0.888889	0.384097	0.388106	-2.08797	0.310188																3	-1.11111	0.546594	0.731226	-2.81747	0.595249
																					4	-1.333*	0.363454	0.0106663	-2.46797	-0.198702																4	-1.22222	0.534605	0.414209	-2.89115	0.446709
																					5	-1	0.403687	0.263506	-2.26023	0.260231																5	-1.444*	0.452019	0.0408585	-2.85556	-0.0333305
																					6	-1.333*	0.418699	0.042122	-2.64043	-0.0262381																6	-2.111*	0.46746	0.00081795	-3.57043	-0.651794
																				2	1	0.444444	0.406733	1	-0.825298	1.71419															2	1	0.666667	0.486864	1	-0.853229	2.18656
																					3	-0.444444	0.46014	1	-1.88091	0.992021																3	-0.444444	0.395967	1	-1.68058	0.791688
																					4	-0.888889	0.41574	0.580063	-2.18675	0.408969																4	-0.555556	0.447903	1	-1.95382	0.84271
																					5	-0.555556	0.414252	1	-1.84877	0.737659																5	-0.777778	0.441658	1	-2.15655	0.600992
																					6	-0.888889	0.445831	0.795382	-2.28069	0.502908																6	-1.444*	0.456097	0.0441953	-2.86829	-0.0205984
																				3	1	0.888889	0.384097	0.388106	-0.310188	2.08797															3	1	1.11111	0.546594	0.731226	-0.595249	2.81747
																					2	0.444444	0.46014	1	-0.992021	1.88091																2	0.444444	0.395967	1	-0.791688	1.68058
																					4	-0.444444	0.38087	1	-1.63344	0.744556																4	-0.111111	0.300206	1	-1.04829	0.826072
																					5	-0.111111	0.341565	1	-1.17741	0.955188																5	-0.333333	0.417222	1	-1.63582	0.969151
																					6	-0.444444	0.424555	1	-1.76982	0.880933																6	-1	0.399073	0.245806	-2.24583	0.245828
																				4	1	1.333*	0.363454	0.0106663	0.198702	2.46797															4	1	1.22222	0.534605	0.414209	-0.446709	2.89115
																					2	0.888889	0.41574	0.580063	-0.408969	2.18675																2	0.555556	0.447903	1	-0.84271	1.95382
																					3	0.444444	0.38087	1	-0.744556	1.63344																3	0.111111	0.300206	1	-0.826072	1.04829
																					5	0.333333	0.287604	1	-0.56451	1.23118																5	-0.222222	0.321071	1	-1.22454	0.780098
																					6	-4.44089e-16	0.387298	1	-1.20907	1.20907																6	-0.888889	0.417222	0.589965	-2.19137	0.413596
																				5	1	1	0.403687	0.263506	-0.260231	2.26023															5	1	1.444*	0.452019	0.0408585	0.0333305	2.85556
																					2	0.555556	0.414252	1	-0.737659	1.84877																2	0.777778	0.441658	1	-0.600992	2.15655
																					3	0.111111	0.341565	1	-0.955188	1.17741																3	0.333333	0.417222	1	-0.969151	1.63582
																					4	-0.333333	0.287604	1	-1.23118	0.56451																4	0.222222	0.321071	1	-0.780098	1.22454
																					6	-0.333333	0.372678	1	-1.49676	0.830094																6	-0.666667	0.384097	1	-1.86574	0.53241
																				6	1	1.333*	0.418699	0.042122	0.0262381	2.64043															6	1	2.111*	0.46746	0.00081795	0.651794	3.57043
																					2	0.888889	0.445831	0.795382	-0.502908	2.28069																2	1.444*	0.456097	0.0441953	0.0205984	2.86829
																					3	0.444444	0.424555	1	-0.880933	1.76982																3	1	0.399073	0.245806	-0.245828	2.24583
																					4	4.44089e-16	0.387298	1	-1.20907	1.20907																4	0.888889	0.417222	0.589965	-0.413596	2.19137
																					5	0.333333	0.372678	1	-0.830094	1.49676																5	0.666667	0.384097	1	-0.53241	1.86574
																			Based on estimated marginal means																					Based on estimated marginal means
																			a. Adjustment for multiple comparisons: Bonferroni. *. The mean difference is significant at the .05 level.																					a. Adjustment for multiple comparisons: Bonferroni. *. The mean difference is significant at the .05 level.
																			Multivariate Tests																					Multivariate Tests
																			Dose		Value	F	Hypothesis df	Error df	Sig.	Partial Eta Squared	Noncent. Parameter	Observed Powerb												Dose		Value	F	Hypothesis df	Error df	Sig.	Partial Eta Squared	Noncent. Parameter	Observed Powerb
																			0	Pillai's trace	0.60813	11.173a	5	36	1.50435e-06	0.60813	55.8672	0.999967												0	Pillai's trace	0.696234	16.502a	5	36	1.85194e-08	0.696234	82.5122	1
																				Wilks' lambda	0.39187	11.173a	5	36	1.50435e-06	0.60813	55.8672	0.999967													Wilks' lambda	0.303766	16.502a	5	36	1.85194e-08	0.696234	82.5122	1
																				Hotelling's trace	1.55187	11.173a	5	36	1.50435e-06	0.60813	55.8672	0.999967													Hotelling's trace	2.292	16.502a	5	36	1.85194e-08	0.696234	82.5122	1
																				Roy's largest root	1.55187	11.173a	5	36	1.50435e-06	0.60813	55.8672	0.999967													Roy's largest root	2.292	16.502a	5	36	1.85194e-08	0.696234	82.5122	1
																			1.25	Pillai's trace	0.504945	7.344a	5	36	7.84644e-05	0.504945	36.7192	0.996945												1.25	Pillai's trace	0.745804	21.125a	5	36	8.25104e-10	0.745804	105.623	1
																				Wilks' lambda	0.495055	7.344a	5	36	7.84644e-05	0.504945	36.7192	0.996945													Wilks' lambda	0.254196	21.125a	5	36	8.25104e-10	0.745804	105.623	1
																				Hotelling's trace	1.01998	7.344a	5	36	7.84644e-05	0.504945	36.7192	0.996945													Hotelling's trace	2.93398	21.125a	5	36	8.25104e-10	0.745804	105.623	1
																				Roy's largest root	1.01998	7.344a	5	36	7.84644e-05	0.504945	36.7192	0.996945													Roy's largest root	2.93398	21.125a	5	36	8.25104e-10	0.745804	105.623	1
																			2	Pillai's trace	0.442531	5.716a	5	36	0.000557428	0.442531	28.5775	0.982888												2	Pillai's trace	0.489662	6.908a	5	36	0.000130132	0.489662	34.5415	0.995086
																				Wilks' lambda	0.557469	5.716a	5	36	0.000557428	0.442531	28.5775	0.982888													Wilks' lambda	0.510338	6.908a	5	36	0.000130132	0.489662	34.5415	0.995086
																				Hotelling's trace	0.793821	5.716a	5	36	0.000557428	0.442531	28.5775	0.982888													Hotelling's trace	0.959486	6.908a	5	36	0.000130132	0.489662	34.5415	0.995086
																				Roy's largest root	0.793821	5.716a	5	36	0.000557428	0.442531	28.5775	0.982888													Roy's largest root	0.959486	6.908a	5	36	0.000130132	0.489662	34.5415	0.995086
																			2.5	Pillai's trace	0.570358	9.558a	5	36	7.22101e-06	0.570358	47.7907	0.999762												2.5	Pillai's trace	0.293352	2.989a	5	36	0.0234003	0.293352	14.9448	0.800698
																				Wilks' lambda	0.429642	9.558a	5	36	7.22101e-06	0.570358	47.7907	0.999762													Wilks' lambda	0.706648	2.989a	5	36	0.0234003	0.293352	14.9448	0.800698
																				Hotelling's trace	1.32752	9.558a	5	36	7.22101e-06	0.570358	47.7907	0.999762													Hotelling's trace	0.415132	2.989a	5	36	0.0234003	0.293352	14.9448	0.800698
																				Roy's largest root	1.32752	9.558a	5	36	7.22101e-06	0.570358	47.7907	0.999762													Roy's largest root	0.415132	2.989a	5	36	0.0234003	0.293352	14.9448	0.800698
																			5	Pillai's trace	0.304007	3.145a	5	36	0.0186164	0.304007	15.7247	0.823428												5	Pillai's trace	0.380466	4.422a	5	36	0.00305514	0.380466	22.1081	0.94051
																				Wilks' lambda	0.695993	3.145a	5	36	0.0186164	0.304007	15.7247	0.823428													Wilks' lambda	0.619534	4.422a	5	36	0.00305514	0.380466	22.1081	0.94051
																				Hotelling's trace	0.436796	3.145a	5	36	0.0186164	0.304007	15.7247	0.823428													Hotelling's trace	0.614115	4.422a	5	36	0.00305514	0.380466	22.1081	0.94051
																				Roy's largest root	0.436796	3.145a	5	36	0.0186164	0.304007	15.7247	0.823428													Roy's largest root	0.614115	4.422a	5	36	0.00305514	0.380466	22.1081	0.94051
																			Each F tests the multivariate simple effects of Filament within each level combination of the other effects shown. These tests are based on the linearly independent pairwise comparisons among the estimated marginal means.																					Each F tests the multivariate simple effects of Filament within each level combination of the other effects shown. These tests are based on the linearly independent pairwise comparisons among the estimated marginal means.
																			a. Exact statistic b. Computed using alpha = .05																					a. Exact statistic b. Computed using alpha = .05
																			5. Dose * Filament																					5. Dose * Filament
																			Estimates																					Estimates
																			Measure:Mechanicalsensitivity																					Measure:Mechanicalsensitivity
																			Dose	Filament	Mean	Std. Error	95% Confidence Interval																	Dose	Filament	Mean	Std. Error	95% Confidence Interval
																							Lower Bound	Upper Bound																				Lower Bound	Upper Bound
																			0	1	1.66667	0.401386	0.855434	2.4779																0	1	3.11111	0.338843	2.42628	3.79594
																				2	2.11111	0.45542	1.19067	3.03155																	2	4.33333	0.440959	3.44212	5.22454
																				3	2.22222	0.432478	1.34815	3.09629																	3	5.44444	0.457449	4.51991	6.36898
																				4	2.88889	0.392051	2.09652	3.68125																	4	5.88889	0.444444	4.99063	6.78714
																				5	3.88889	0.392051	3.09652	4.68125																	5	6.55556	0.385701	5.77602	7.33509
																				6	4.33333	0.42673	3.47088	5.19579																	6	6.88889	0.35486	6.17169	7.60609
																			1.25	1	1.44444	0.401386	0.633212	2.25568																1.25	1	2.22222	0.338843	1.53739	2.90705
																				2	2.66667	0.45542	1.74623	3.5871																	2	3.44444	0.440959	2.55323	4.33565
																				3	2.33333	0.432478	1.45926	3.2074																	3	4.66667	0.457449	3.74213	5.5912
																				4	3.22222	0.392051	2.42986	4.01459																	4	4.55556	0.444444	3.6573	5.45381
																				5	3.55556	0.392051	2.76319	4.34792																	5	5.88889	0.385701	5.10936	6.66842
																				6	3.77778	0.42673	2.91532	4.64023																	6	6.22222	0.35486	5.50502	6.93942
																			2	1	1.44444	0.401386	0.633212	2.25568																2	1	2	0.338843	1.31517	2.68483
																				2	2.11111	0.45542	1.19067	3.03155																	2	3	0.440959	2.10879	3.89121
																				3	2.33333	0.432478	1.45926	3.2074																	3	3.77778	0.457449	2.85324	4.70232
																				4	2.88889	0.392051	2.09652	3.68125																	4	3.88889	0.444444	2.99063	4.78714
																				5	3	0.392051	2.20764	3.79236																	5	4.11111	0.385701	3.33158	4.89064
																				6	3.66667	0.42673	2.80421	4.52912																	6	4.66667	0.35486	3.94947	5.38387
																			2.5	1	1.22222	0.401386	0.41099	2.03345																2.5	1	2.33333	0.338843	1.64851	3.01816
																				2	2	0.45542	1.07956	2.92044																	2	2.77778	0.440959	1.88657	3.66899
																				3	2.77778	0.432478	1.90371	3.65185																	3	3.22222	0.457449	2.29768	4.14676
																				4	2.66667	0.392051	1.8743	3.45903																	4	3.44444	0.444444	2.54619	4.3427
																				5	3.55556	0.392051	2.76319	4.34792																	5	3.77778	0.385701	2.99825	4.55731
																				6	4	0.42673	3.13755	4.86245																	6	3.88889	0.35486	3.17169	4.60609
																			5	1	0.666667	0.401386	-0.144566	1.4779																5	1	0.888889	0.338843	0.204061	1.57372
																				2	1.11111	0.45542	0.190673	2.03155																	2	1.55556	0.440959	0.664345	2.44677
																				3	1.55556	0.432478	0.681485	2.42963																	3	2	0.457449	1.07546	2.92454
																				4	2	0.392051	1.20764	2.79236																	4	2.11111	0.444444	1.21286	3.00937
																				5	1.66667	0.392051	0.874303	2.45903																	5	2.33333	0.385701	1.5538	3.11286
																				6	2	0.42673	1.13755	2.86245																	6	3	0.35486	2.2828	3.7172
																			Pairwise Comparisons																					Pairwise Comparisons
																			Measure:Mechanicalsensitivity																					Measure:Mechanicalsensitivity
																			Filament	(I) Dose	(J) Dose	Mean Difference (I-J)	Std. Error	Sig.a	95% Confidence Interval for Differencea															Filament	(I) Dose	(J) Dose	Mean Difference (I-J)	Std. Error	Sig.a	95% Confidence Interval for Differencea
																									Lower Bound	Upper Bound																				Lower Bound	Upper Bound
																			1	0	1.25	0.222222	0.567646	1	-1.46435	1.9088														1	0	1.25	0.888889	0.479197	0.709837	-0.534887	2.31266
																					2	0.222222	0.567646	1	-1.46435	1.9088																2	1.11111	0.479197	0.256055	-0.312665	2.53489
																					2.5	0.444444	0.567646	1	-1.24213	2.13102																2.5	0.777778	0.479197	1	-0.645998	2.20155
																					5	1	0.567646	0.857688	-0.686574	2.68657																5	2.222*	0.479197	0.000373063	0.798446	3.646
																				1.25	0	-0.222222	0.567646	1	-1.9088	1.46435															1.25	0	-0.888889	0.479197	0.709837	-2.31266	0.534887
																					2	0	0.567646	1	-1.68657	1.68657																2	0.222222	0.479197	1	-1.20155	1.646
																					2.5	0.222222	0.567646	1	-1.46435	1.9088																2.5	-0.111111	0.479197	1	-1.53489	1.31266
																					5	0.777778	0.567646	1	-0.908796	2.46435																5	1.33333	0.479197	0.0819377	-0.0904426	2.75711
																				2	0	-0.222222	0.567646	1	-1.9088	1.46435															2	0	-1.11111	0.479197	0.256055	-2.53489	0.312665
																					1.25	0	0.567646	1	-1.68657	1.68657																1.25	-0.222222	0.479197	1	-1.646	1.20155
																					2.3	0.222222	0.567646	1	-1.46435	1.9088																2.3	-0.333333	0.479197	1	-1.75711	1.09044
																					2	0.777778	0.567646	1	-0.908796	2.46435																2	1.11111	0.479197	0.256055	-0.312665	2.53489
																				2.5	0	-0.444444	0.567646	1	-2.13102	1.24213															2.5	0	-0.777778	0.479197	1	-2.20155	0.645998
																					1.25	-0.222222	0.567646	1	-1.9088	1.46435																1.25	0.111111	0.479197	1	-1.31266	1.53489
																					2	-0.222222	0.567646	1	-1.9088	1.46435																2	0.333333	0.479197	1	-1.09044	1.75711
																					5	0.555556	0.567646	1	-1.13102	2.24213																5	1.444*	0.479197	0.0445633	0.0206685	2.86822
																				5	0	-1	0.567646	0.857688	-2.68657	0.686574															5	0	-2.222*	0.479197	0.000373063	-3.646	-0.798446
																					1.25	-0.777778	0.567646	1	-2.46435	0.908796																1.25	-1.33333	0.479197	0.0819377	-2.75711	0.0904426
																					2	-0.777778	0.567646	1	-2.46435	0.908796																2	-1.11111	0.479197	0.256055	-2.53489	0.312665
																					2.5	-0.555556	0.567646	1	-2.24213	1.13102																2.5	-1.444*	0.479197	0.0445633	-2.86822	-0.0206685
																			2	0	1.25	-0.555556	0.644061	1	-2.46917	1.35806														2	0	1.25	0.888889	0.62361	1	-0.963962	2.74174
																					2	0	0.644061	1	-1.91362	1.91362																2	1.33333	0.62361	0.386709	-0.519518	3.18618
																					2.5	0.111111	0.644061	1	-1.80251	2.02473																2.5	1.55556	0.62361	0.168466	-0.297295	3.40841
																					5	1	0.644061	1	-0.913616	2.91362																5	2.778*	0.62361	0.000661028	0.924927	4.63063
																				1.25	0	0.555556	0.644061	1	-1.35806	2.46917															1.25	0	-0.888889	0.62361	1	-2.74174	0.963962
																					2	0.555556	0.644061	1	-1.35806	2.46917																2	0.444444	0.62361	1	-1.40841	2.2973
																					2.5	0.666667	0.644061	1	-1.24695	2.58028																2.5	0.666667	0.62361	1	-1.18618	2.51952
																					5	1.55556	0.644061	0.203873	-0.358061	3.46917																5	1.889*	0.62361	0.0428458	0.0360381	3.74174
																				2	0	0	0.644061	1	-1.91362	1.91362															2	0	-1.33333	0.62361	0.386709	-3.18618	0.519518
																					1.25	-0.555556	0.644061	1	-2.46917	1.35806																1.25	-0.444444	0.62361	1	-2.2973	1.40841
																					2.5	0.111111	0.644061	1	-1.80251	2.02473																2.5	0.222222	0.62361	1	-1.63063	2.07507
																					5	1	0.644061	1	-0.913616	2.91362																5	1.44444	0.62361	0.257511	-0.408406	3.2973
																				2.5	0	-0.111111	0.644061	1	-2.02473	1.80251															2.5	0	-1.55556	0.62361	0.168466	-3.40841	0.297295
																					1.25	-0.666667	0.644061	1	-2.58028	1.24695																1.25	-0.666667	0.62361	1	-2.51952	1.18618
																					2	-0.111111	0.644061	1	-2.02473	1.80251																2	-0.222222	0.62361	1	-2.07507	1.63063
																					5	0.888889	0.644061	1	-1.02473	2.80251																5	1.22222	0.62361	0.569984	-0.630629	3.07507
																				5	0	-1	0.644061	1	-2.91362	0.913616															5	0	-2.778*	0.62361	0.000661028	-4.63063	-0.924927
																					1.25	-1.55556	0.644061	0.203873	-3.46917	0.358061																1.25	-1.889*	0.62361	0.0428458	-3.74174	-0.0360381
																					2	-1	0.644061	1	-2.91362	0.913616																2	-1.44444	0.62361	0.257511	-3.2973	0.408406
																					2.5	-0.888889	0.644061	1	-2.80251	1.02473																2.5	-1.22222	0.62361	0.569984	-3.07507	0.630629
																			3	0	1.25	-0.111111	0.611616	1	-1.92833	1.7061														3	0	1.25	0.777778	0.64693	1	-1.14436	2.69992
																					2	-0.111111	0.611616	1	-1.92833	1.7061																2	1.66667	0.64693	0.137852	-0.255473	3.58881
																					2.5	-0.555556	0.611616	1	-2.37277	1.26166																2.5	2.222*	0.64693	0.0139354	0.300082	4.14436
																					5	0.666667	0.611616	1	-1.15055	2.48388																5	3.444*	0.64693	4.19174e-05	1.5223	5.36658
																				1.25	0	0.111111	0.611616	1	-1.7061	1.92833															1.25	0	-0.777778	0.64693	1	-2.69992	1.14436
																					2	0	0.611616	1	-1.81722	1.81722																2	0.888889	0.64693	1	-1.03325	2.81103
																					2.5	-0.444444	0.611616	1	-2.26166	1.37277																2.5	1.44444	0.64693	0.312272	-0.477696	3.36658
																					5	0.777778	0.611616	1	-1.03944	2.59499																5	2.667*	0.64693	0.00183787	0.744527	4.58881
																				2	0	0.111111	0.611616	1	-1.7061	1.92833															2	0	-1.66667	0.64693	0.137852	-3.58881	0.255473
																					1.25	0	0.611616	1	-1.81722	1.81722																1.25	-0.888889	0.64693	1	-2.81103	1.03325
																					2.5	-0.444444	0.611616	1	-2.26166	1.37277																2.5	0.555556	0.64693	1	-1.36658	2.4777
																					5	0.777778	0.611616	1	-1.03944	2.59499																5	1.77778	0.64693	0.0894997	-0.144362	3.69992
																				2.5	0	0.555556	0.611616	1	-1.26166	2.37277															2.5	0	-2.222*	0.64693	0.0139354	-4.14436	-0.300082
																					1.25	0.444444	0.611616	1	-1.37277	2.26166																1.25	-1.44444	0.64693	0.312272	-3.36658	0.477696
																					2	0.444444	0.611616	1	-1.37277	2.26166																2	-0.555556	0.64693	1	-2.4777	1.36658
																					5	1.22222	0.611616	0.525081	-0.594994	3.03944																5	1.22222	0.64693	0.661207	-0.699918	3.14436
																				5	0	-0.666667	0.611616	1	-2.48388	1.15055															5	0	-3.444*	0.64693	4.19174e-05	-5.36658	-1.5223
																					1.25	-0.777778	0.611616	1	-2.59499	1.03944																1.25	-2.667*	0.64693	0.00183787	-4.58881	-0.744527
																					2	-0.777778	0.611616	1	-2.59499	1.03944																2	-1.77778	0.64693	0.0894997	-3.69992	0.144362
																					2.5	-1.22222	0.611616	0.525081	-3.03944	0.594994																2.5	-1.22222	0.64693	0.661207	-3.14436	0.699918
																			4	0	1.25	-0.333333	0.554443	1	-1.98068	1.31401														4	0	1.25	1.33333	0.628539	0.401415	-0.534165	3.20083
																					2	0	0.554443	1	-1.64735	1.64735																2	2.000*	0.628539	0.028274	0.132502	3.8675
																					2.5	0.222222	0.554443	1	-1.42512	1.86957																2.5	2.444*	0.628539	0.00370798	0.576946	4.31194
																					5	0.888889	0.554443	1	-0.758457	2.53623																5	3.778*	0.628539	4.56984e-06	1.91028	5.64528
																				1.25	0	0.333333	0.554443	1	-1.31401	1.98068															1.25	0	-1.33333	0.628539	0.401415	-3.20083	0.534165
																					2	0.333333	0.554443	1	-1.31401	1.98068																2	0.666667	0.628539	1	-1.20083	2.53416
																					2.5	0.555556	0.554443	1	-1.09179	2.2029																2.5	1.11111	0.628539	0.847276	-0.756387	2.97861
																					5	1.22222	0.554443	0.333102	-0.425124	2.86957																5	2.444*	0.628539	0.00370798	0.576946	4.31194
																				2	0	0	0.554443	1	-1.64735	1.64735															2	0	-2.000*	0.628539	0.028274	-3.8675	-0.132502
																					1.25	-0.333333	0.554443	1	-1.98068	1.31401																1.25	-0.666667	0.628539	1	-2.53416	1.20083
																					2.5	0.222222	0.554443	1	-1.42512	1.86957																2.5	0.444444	0.628539	1	-1.42305	2.31194
																					5	0.888889	0.554443	1	-0.758457	2.53623																5	1.77778	0.628539	0.072755	-0.0897203	3.64528
																				2.5	0	-0.222222	0.554443	1	-1.86957	1.42512															2.5	0	-2.444*	0.628539	0.00370798	-4.31194	-0.576946
																					1.25	-0.555556	0.554443	1	-2.2029	1.09179																1.25	-1.11111	0.628539	0.847276	-2.97861	0.756387
																					2	-0.222222	0.554443	1	-1.86957	1.42512																2	-0.444444	0.628539	1	-2.31194	1.42305
																					5	0.666667	0.554443	1	-0.980679	2.31401																5	1.33333	0.628539	0.401415	-0.534165	3.20083
																				5	0	-0.888889	0.554443	1	-2.53623	0.758457															5	0	-3.778*	0.628539	4.56984e-06	-5.64528	-1.91028
																					1.25	-1.22222	0.554443	0.333102	-2.86957	0.425124																1.25	-2.444*	0.628539	0.00370798	-4.31194	-0.576946
																					2	-0.888889	0.554443	1	-2.53623	0.758457																2	-1.77778	0.628539	0.072755	-3.64528	0.0897203
																					2.5	-0.666667	0.554443	1	-2.31401	0.980679																2.5	-1.33333	0.628539	0.401415	-3.20083	0.534165
																			5	0	1.25	0.333333	0.554443	1	-1.31401	1.98068														5	0	1.25	0.666667	0.545464	1	-0.954	2.28733
																					2	0.888889	0.554443	1	-0.758457	2.53623																2	2.444*	0.545464	0.000607657	0.823778	4.06511
																					2.5	0.333333	0.554443	1	-1.31401	1.98068																2.5	2.778*	0.545464	8.81313e-05	1.15711	4.39844
																					5	2.222*	0.554443	0.00259561	0.574876	3.86957																5	4.222*	0.545464	1.78234e-08	2.60156	5.84289
																				1.25	0	-0.333333	0.554443	1	-1.98068	1.31401															1.25	0	-0.666667	0.545464	1	-2.28733	0.954
																					2	0.555556	0.554443	1	-1.09179	2.2029																2	1.778*	0.545464	0.0228418	0.157111	3.39844
																					2.5	-2.22045e-16	0.554443	1	-1.64735	1.64735																2.5	2.111*	0.545464	0.00392149	0.490444	3.73178
																					5	1.889*	0.554443	0.0150966	0.241543	3.53623																5	3.556*	0.545464	8.83493e-07	1.93489	5.17622
																				2	0	-0.888889	0.554443	1	-2.53623	0.758457															2	0	-2.444*	0.545464	0.000607657	-4.06511	-0.823778
																					1.25	-0.555556	0.554443	1	-2.2029	1.09179																1.25	-1.778*	0.545464	0.0228418	-3.39844	-0.157111
																					2.5	-0.555556	0.554443	1	-2.2029	1.09179																2.5	0.333333	0.545464	1	-1.28733	1.954
																					5	1.33333	0.554443	0.208999	-0.314013	2.98068																5	1.778*	0.545464	0.0228418	0.157111	3.39844
																				2.5	0	-0.333333	0.554443	1	-1.98068	1.31401															2.5	0	-2.778*	0.545464	8.81313e-05	-4.39844	-1.15711
																					1.25	2.22045e-16	0.554443	1	-1.64735	1.64735																1.25	-2.111*	0.545464	0.00392149	-3.73178	-0.490444
																					2	0.555556	0.554443	1	-1.09179	2.2029																2	-0.333333	0.545464	1	-1.954	1.28733
																					5	1.889*	0.554443	0.0150966	0.241543	3.53623																5	1.44444	0.545464	0.115274	-0.176222	3.06511
																				5	0	-2.222*	0.554443	0.00259561	-3.86957	-0.574876															5	0	-4.222*	0.545464	1.78234e-08	-5.84289	-2.60156
																					1.25	-1.889*	0.554443	0.0150966	-3.53623	-0.241543																1.25	-3.556*	0.545464	8.83493e-07	-5.17622	-1.93489
																					2	-1.33333	0.554443	0.208999	-2.98068	0.314013																2	-1.778*	0.545464	0.0228418	-3.39844	-0.157111
																					2.5	-1.889*	0.554443	0.0150966	-3.53623	-0.241543																2.5	-1.44444	0.545464	0.115274	-3.06511	0.176222
																			6	0	1.25	0.555556	0.603488	1	-1.23751	2.34862														6	0	1.25	0.666667	0.501848	1	-0.824411	2.15774
																					2	0.666667	0.603488	1	-1.1264	2.45973																2	2.222*	0.501848	0.000717272	0.731145	3.7133
																					2.5	0.333333	0.603488	1	-1.45973	2.1264																2.5	3.000*	0.501848	5.07703e-06	1.50892	4.49108
																					5	2.333*	0.603488	0.00396718	0.540268	4.1264																5	3.889*	0.501848	1.73519e-08	2.39781	5.37997
																				1.25	0	-0.555556	0.603488	1	-2.34862	1.23751															1.25	0	-0.666667	0.501848	1	-2.15774	0.824411
																					2	0.111111	0.603488	1	-1.68195	1.90418																2	1.556*	0.501848	0.0354025	0.0644779	3.04663
																					2.5	-0.222222	0.603488	1	-2.01529	1.57084																2.5	2.333*	0.501848	0.000359162	0.842256	3.82441
																					5	1.77778	0.603488	0.0534771	-0.0152879	3.57084																5	3.222*	0.501848	1.21137e-06	1.73114	4.7133
																				2	0	-0.666667	0.603488	1	-2.45973	1.1264															2	0	-2.222*	0.501848	0.000717272	-3.7133	-0.731145
																					1.25	-0.111111	0.603488	1	-1.90418	1.68195																1.25	-1.556*	0.501848	0.0354025	-3.04663	-0.0644779
																					2.5	-0.333333	0.603488	1	-2.1264	1.45973																2.5	0.777778	0.501848	1	-0.7133	2.26886
																					5	1.66667	0.603488	0.0864143	-0.126399	3.45973																5	1.667*	0.501848	0.019222	0.175589	3.15774
																				2.5	0	-0.333333	0.603488	1	-2.1264	1.45973															2.5	0	-3.000*	0.501848	5.07703e-06	-4.49108	-1.50892
																					1.25	0.222222	0.603488	1	-1.57084	2.01529																1.25	-2.333*	0.501848	0.000359162	-3.82441	-0.842256
																					2	0.333333	0.603488	1	-1.45973	2.1264																2	-0.777778	0.501848	1	-2.26886	0.7133
																					5	2.000*	0.603488	0.0196017	0.206934	3.79307																5	0.888889	0.501848	0.841419	-0.602189	2.37997
																				5	0	-2.333*	0.603488	0.00396718	-4.1264	-0.540268															5	0	-3.889*	0.501848	1.73519e-08	-5.37997	-2.39781
																					1.25	-1.77778	0.603488	0.0534771	-3.57084	0.0152879																1.25	-3.222*	0.501848	1.21137e-06	-4.7133	-1.73114
																					2	-1.66667	0.603488	0.0864143	-3.45973	0.126399																2	-1.667*	0.501848	0.019222	-3.15774	-0.175589
																					2.5	-2.000*	0.603488	0.0196017	-3.79307	-0.206934																2.5	-0.888889	0.501848	0.841419	-2.37997	0.602189
																			Based on estimated marginal means																					Based on estimated marginal means
																			a. Adjustment for multiple comparisons: Bonferroni. *. The mean difference is significant at the .05 level.																					a. Adjustment for multiple comparisons: Bonferroni. *. The mean difference is significant at the .05 level.
																			Univariate Tests																					Univariate Tests
																			Measure:Mechanicalsensitivity																					Measure:Mechanicalsensitivity
																			Filament		Sum of Squares	df	Mean Square	F	Sig.	Partial Eta Squared	Noncent. Parameter	Observed Powera												Filament		Sum of Squares	df	Mean Square	F	Sig.	Partial Eta Squared	Noncent. Parameter	Observed Powera
																			1	Contrast	5.24444	4	1.31111	0.904215	0.470699	0.0829234	3.61686	0.260844												1	Contrast	23.1111	4	5.77778	5.5914	0.00113409	0.358621	22.3656	0.962722
																				Error	58	40	1.45																		Error	41.3333	40	1.03333
																			2	Contrast	11.3333	4	2.83333	1.51786	0.215352	0.131783	6.07143	0.426464												2	Contrast	36.9778	4	9.24444	5.28254	0.00163848	0.345658	21.1302	0.952049
																				Error	74.6667	40	1.86667																		Error	70	40	1.75
																			3	Contrast	6.97778	4	1.74444	1.0363	0.400513	0.0938995	4.14521	0.296536												3	Contrast	63.2444	4	15.8111	8.39528	5.14494e-05	0.456382	33.5811	0.996931
																				Error	67.3333	40	1.68333																		Error	75.3333	40	1.88333
																			4	Contrast	7.46667	4	1.86667	1.3494	0.268654	0.118896	5.39759	0.381493												4	Contrast	69.8667	4	17.4667	9.825	1.24059e-05	0.495586	39.3	0.999235
																				Error	55.3333	40	1.38333																		Error	71.1111	40	1.77778
																			5	Contrast	27.8667	4	6.96667	5.03614	0.00220642	0.334936	20.1446	0.941616												5	Contrast	103.644	4	25.9111	19.3527	6.29375e-09	0.659316	77.4108	1
																				Error	55.3333	40	1.38333																		Error	53.5556	40	1.33889
																			6	Contrast	29.5556	4	7.38889	4.50847	0.00422473	0.310748	18.0339	0.912133												6	Contrast	93.4667	4	23.3667	20.6176	2.76037e-09	0.673391	82.4706	1
																				Error	65.5556	40	1.63889																		Error	45.3333	40	1.13333
																			Each F tests the simple effects of Dose within each level combination of the other effects shown. These tests are based on the linearly independent pairwise comparisons among the estimated marginal means.																					Each F tests the simple effects of Dose within each level combination of the other effects shown. These tests are based on the linearly independent pairwise comparisons among the estimated marginal means.
																			a. Computed using alpha = .05																					a. Computed using alpha = .05
																			Post Hoc Tests																					Post Hoc Tests
																			Dose																					Dose
																			Multiple Comparisons																					Multiple Comparisons
																			Mechanicalsensitivity Bonferroni																					Mechanicalsensitivity Bonferroni
																			(I) Dose	(J) Dose	Mean Difference (I-J)	Std. Error	Sig.	95% Confidence Interval																(I) Dose	(J) Dose	Mean Difference (I-J)	Std. Error	Sig.	95% Confidence Interval
																								Lower Bound	Upper Bound																				Lower Bound	Upper Bound
																			0	1.25	0.0185185	0.466578	1	-1.36777	1.4048															0	1.25	0.87037	0.414418	0.420612	-0.360936	2.10168
																				2	0.277778	0.466578	1	-1.10851	1.66406																2	1.7963*	0.414418	0.000958294	0.56499	3.0276
																				2.5	0.148148	0.466578	1	-1.23814	1.53443																2.5	2.1296*	0.414418	7.59907e-05	0.898323	3.36094
																				5	1.35185	0.466578	0.0607693	-0.0344327	2.73814																5	3.3889*	0.414418	4.55009e-09	2.15758	4.6202
																			1.25	0	-0.0185185	0.466578	1	-1.4048	1.36777															1.25	0	-0.87037	0.414418	0.420612	-2.10168	0.360936
																				2	0.259259	0.466578	1	-1.12703	1.64554																2	0.925926	0.414418	0.311194	-0.30538	2.15723
																				2.5	0.12963	0.466578	1	-1.25665	1.51591																2.5	1.2593*	0.414418	0.041748	0.027953	2.49057
																				5	1.33333	0.466578	0.0674225	-0.0529512	2.71962																5	2.5185*	0.414418	3.68059e-06	1.28721	3.74982
																			2	0	-0.277778	0.466578	1	-1.66406	1.10851															2	0	-1.7963*	0.414418	0.000958294	-3.0276	-0.56499
																				1.25	-0.259259	0.466578	1	-1.64554	1.12703																1.25	-0.925926	0.414418	0.311194	-2.15723	0.30538
																				2.5	-0.12963	0.466578	1	-1.51591	1.25665																2.5	0.333333	0.414418	1	-0.897973	1.56464
																				5	1.07407	0.466578	0.266195	-0.31221	2.46036																5	1.5926*	0.414418	0.0042537	0.361286	2.8239
																			2.5	0	-0.148148	0.466578	1	-1.53443	1.23814															2.5	0	-2.1296*	0.414418	7.59907e-05	-3.36094	-0.898323
																				1.25	-0.12963	0.466578	1	-1.51591	1.25665																1.25	-1.2593*	0.414418	0.041748	-2.49057	-0.027953
																				2	0.12963	0.466578	1	-1.25665	1.51591																2	-0.333333	0.414418	1	-1.56464	0.897973
																				5	1.2037	0.466578	0.136636	-0.182581	2.58999																5	1.2593*	0.414418	0.041748	0.027953	2.49057
																			5	0	-1.35185	0.466578	0.0607693	-2.73814	0.0344327															5	0	-3.3889*	0.414418	4.55009e-09	-4.6202	-2.15758
																				1.25	-1.33333	0.466578	0.0674225	-2.71962	0.0529512																1.25	-2.5185*	0.414418	3.68059e-06	-3.74982	-1.28721
																				2	-1.07407	0.466578	0.266195	-2.46036	0.31221																2	-1.5926*	0.414418	0.0042537	-2.8239	-0.361286
																				2.5	-1.2037	0.466578	0.136636	-2.58999	0.182581																2.5	-1.2593*	0.414418	0.041748	-2.49057	-0.027953
																			Based on observed means. The error term is Mean Square(Error) = .980.																					Based on observed means. The error term is Mean Square(Error) = .773.

## Sheet: THC test report
Cannabinoids Test Report						Terpenes Test Report
Parameter	Result % (w/v)	SD (n=2)	Result (mg/ml)	Method		Parameter	Result (mg/ml)	Method
Cannabidiolic Acid (CBDA)	<LOQ	-	<LOQ	FC-PNT-01 (HPLC-UV)		Alpha-Pinene	<LOQ	PI-FC-Terp-022.18.001 (GC-FID)
Cannabigerolic Acid (CBGA)	<LOQ	-	<LOQ	FC-PNT-01 (HPLC-UV)		Camphene	<LOQ	PI-FC-Terp-022.18.001 (GC-FID)
Cannabigerol (CBG)	<LOQ	-	<LOQ	FC-PNT-01 (HPLC-UV)		(-)-Beta-Pinene	<LOQ	PI-FC-Terp-022.18.001 (GC-FID)
Cannabidiol (CBD)	<LOQ	-	<LOQ	FC-PNT-01 (HPLC-UV)		Beta-Myrcene	<LOQ	PI-FC-Terp-022.18.001 (GC-FID)
Tetrahydrocannabivarin (THCV)	<LOQ	-	<LOQ	FC-PNT-01 (HPLC-UV)		Delta-3-Carene	<LOQ	PI-FC-Terp-022.18.001 (GC-FID)
Cannabinol (CBN)	<LOQ	-	<LOQ	FC-PNT-01 (HPLC-UV)		Alpha-Terpinene	<LOQ	PI-FC-Terp-022.18.001 (GC-FID)
Tetrahydrocannabinol (THC)	10.70	0.71	106.97	FC-PNT-01 (HPLC-UV)		p-Cymene	<LOQ	PI-FC-Terp-022.18.001 (GC-FID)
Tetrahydrocannabinolic Acid (THCA)	<LOQ	-	<LOQ	FC-PNT-01 (HPLC-UV)		d-Limonene	<LOQ	PI-FC-Terp-022.18.001 (GC-FID)
Cannabichromene (CBC)	<LOQ	-	<LOQ	FC-PNT-01 (HPLC-UV)		cis-Ocimene	<LOQ	PI-FC-Terp-022.18.001 (GC-FID)
LOQ (limit of quantification)= 0.017% (w/v) = 0.17 mg/ml						Gamma-Terpinene	<LOQ	PI-FC-Terp-022.18.001 (GC-FID)
						trans-Ocimene	<LOQ	PI-FC-Terp-022.18.001 (GC-FID)
						Terpinolene	<LOQ	PI-FC-Terp-022.18.001 (GC-FID)
						Linalool	<LOQ	PI-FC-Terp-022.18.001 (GC-FID)
						(-)-Isopulegol	<LOQ	PI-FC-Terp-022.18.001 (GC-FID)
						Geraniol	<LOQ	PI-FC-Terp-022.18.001 (GC-FID)
						Beta-Caryophyllene	<LOQ	PI-FC-Terp-022.18.001 (GC-FID)
						Alpha-Humulene	<LOQ	PI-FC-Terp-022.18.001 (GC-FID)
						cis-Nerolidol	<LOQ	PI-FC-Terp-022.18.001 (GC-FID)
						trans-Nerolidol	<LOQ	PI-FC-Terp-022.18.001 (GC-FID)
						Caryophyllene Oxide	<LOQ	PI-FC-Terp-022.18.001 (GC-FID)
						(-)-Guaiol	<LOQ	PI-FC-Terp-022.18.001 (GC-FID)
						(-)-Alpha-Bisabolol	<LOQ	PI-FC-Terp-022.18.001 (GC-FID)
						LOQ (limit of quantification) = 0.004 mg/ml
