# Supplementary material for: Disease-modifying effects of natural Δ9-tetrahydrocannabinol in endometriosis-associated pain
Source: eLife. 2020 Jan 14;9:e50356. doi: 10.7554/eLife.50356 (PMC6977967; doi:10.7554/eLife.50356)
Supplement: Figure 3—source data 1. [file elife-50356-fig3-data1.xlsx]

## Sheet: Figure 3
Figure 3a: Pelvic mechanical sensitivity (AUC)																								Figure 3b: Absence of tolerance to THC - pelvic mechanical sensitivity (AUC)																Figure 3c: Nocifensive behavior
Raw data		Mechanical sensitivity (AUC)																						Raw data		Mechanical sensitivity (AUC)														Raw data		Nocifensive behavior (s)
		Sham-vehicle					Sham-THC					Endo-vehicle					Endo-THC									Sham-vehicle			Endo-vehicle			Endo-7daysTHC			Endo-AcuteTHC							Sham-Vehicle	Endo-vehicle	Endo-7daysTHC	Endo-AcuteTHC
		Day -1	Day 7	Day14	Day 21	Day 28	Day -1	Day 7	Day14	Day 21	Day 28	Day -1	Day 7	Day14	Day 21	Day 28	Day -1	Day 7	Day14	Day 21	Day 28					Day -1	Day 7	Day14	Day -1	Day 7	Day14	Day -1	Day 7	Day14	Day -1	Day 7	Day14					1.3	4.01	1.72	0
		3.13	10.1	5.445	6.89	7.405	7.59	9.87	5.595	6.38	3.92	10.45	12.1	14.65	7.84	8.92	7.085	12.92	13.275	13.2	9.475					5.005	8.46	6.93	5.75	13.39	14.375	6.575	12.38	6.14	6.3	13.555	6.695					0	4.2	1.12	0
		3.33	4.58	4.025	4.03	5.72	8.47	8.115	5.17	6.53	8.14	3.875	7.87	10.72	9.02	8.11	11.185	11.47	8.62	6.03	4.54					4.34	8.075	7.05	4.73	10.38	13.56	4.5	11.01	4.925	5.595	10.765	3.755					0	3.27	0.81	1.69
		5.595	6.19	6.47	4.965	2.735	6.89	4.54	4.38	4.7	3.56	7.76	9.44	8.3	10.925	9.91	5.52	9.51	7.085	9.24	5.48					6.69	6.105	4.345	5.315	14.93	13.74	4.54	12.93	6.655	5.125	9.825	5.945					0	0	3.1	4.12
		6.725	11.59	10.06	8.495	4.34	8.325	5.4	7.36	4.54	4.965	7.79	15.05	10.925	13.635	10.645	5.92	4.925	4.735	4.965	4.885					5.75	8.815	5.91	5.715	12.26	12.81	6.18	12.15	5.32	4.15	11.04	6.11					3.17	2.41	0.94	1.21
		4.975	11.395	7.975	7.25	5.91	3.765	7.355	3.765	3.56	4.58	3.99	13.385	11.08	11.36	17.035	8.685	8.495	11.595	6.53	5.16					4.805	8.07	6.93	3.4	11.825	11.83	6.335	15.155	7.675	5.755	11.47	6.735					2.61	0	1.37	0
		9.16	3.745	3.95	3.17	3.56	9.715	10.62	4.11	3.565	5.52	3.915	9.05	7.87	7.91	9.275	5.515	7.91	4.94	3.52	5.13					5.755	7.125	7.285	5.59	15.74	16.64	7.325	12.805	7.64	4.73	11	6.215					1.4	5.34	0	1.03
		5.36	4.575	5.29	2.35	3.72	3.365	4.565	4.935	3.125	4.14	4.15	8.615	7.67	6.57	7.905	5.355	10.185	10.22	8.26	9.195					4.545	7.68	6.34	6.735	11.24	12.99	4.965	10.105	5.09	5.36	9.28	4.535					4.53	1.28	0	0.88
		7.82	11.785	11.87	8.105	8.25	6.46	10.445	10.22	6.935	4.15	6.795	12.765	13.4	10.42	11.745	4.54	5.325	4.34	4.27	6.27					4.15	7.32	4.73	6.5	11.005	13.355	3.91	9.905	5.395	5.95	9.635	4.89					0.54	1.13	0	2.59
		9.27	12.495	9.635	6.345	7.285	4.705	8.66	6.27	3.325	3.33	7.015	11.04	8.845	9.04	9.085	5.755	10.03	6.7	4.54	3.76					4.615	8.225	5.005	6.965	16.655	11.48	5.365	10.065	4.34	5.715	11.475	6.105					1.16	2.31	2.59
		4.51	8.5	5.645	4.34	5.325	5.555	10.25	7.705	11.19	15.89	5.21	14.445	12.73	12.46	19.245	3.13	4.74	8.3	4.5	4.38					6.335	7.55	6.895	4.895	11.82	15.19	7.16	13.985	8.815								0	4.29
		5.91	11.9	9.315	6.345	5.755	7.06	8.815	6.735	2.775	3.525	7.13	18.89	16.885	15.66	10.81	4.035	6.7	9.995	6.025	5.125					7.515	8.5	7.36	4.725	11.05	10.53											0	5.71
		4.105	9.54	9.995	7.68	6.855	6.855	9.045	6.295	6.495	6.185	4.905	10.45	8.23	10.645	9.95	8.575	14.955	6.185	5.955	5.515					7.515	8.53	7.68	5.36	9.87	12.805
		5.87	8.06	7.205	5.125	2.965	6.735	7.555	4.495	1.955	3.765	6.74	17.825	15.115	11.315	11.27	7.005	9.235	8.415	6.375	7.63				Mean	5.585	7.87125	6.37167	5.47333	12.5137	13.2754	5.6855	12.049	6.1995	5.40889	10.8939	5.665				Mean	1.21909	2.72182	1.10333	1.44
		8.655	15.945	13.99	14.41	4.305	6.54	7.995	5.325	6.47	3.405	3.99	8.765	10.33	8.76	11.81	5.14	6.075	4.775	5.205	4.115				SD	1.20098	0.762347	1.11863	0.99101	2.19023	1.6478	1.19311	1.77183	1.45441	0.657998	1.28122	1.03102				SD	1.56943	2.0106	1.11988	1.37577
		2.815	8.065	5.325	4.345	4.81	4.27	3.95	2.815	3.24	2.575	6.185	11.405	14.37	17.47	11.945	3.32	7.635	4.73	3.6	3.68				SEM	0.346694	0.220071	0.32292	0.28608	0.632266	0.475679	0.377293	0.560302	0.459925	0.219333	0.427075	0.343672				SEM	0.473201	0.606218	0.373292	0.486408
		4.465	5.715	6.265	4.54	6.66	9.515	16.485	8.53	12.23	8.88	4.11	8.34	10.375	9.865	10.025	5.945	9.855	10.88	8.49	5.365				CI	3.18303	6.34656	4.13441	3.49131	8.13328	9.97982	3.29929	8.50534	3.29068	4.09289	8.33144	3.60297				CI	-1.91977	-1.29937	-1.13642	-1.31154
		4.615	7.91	4.145	7.365	3.135						4.86	7.585	9.125	9.665	8.845	8.04	10.06	7.045	6.97	7.325					7.98697	9.39594	8.60892	7.45535	16.8942	16.571	8.07171	15.5927	9.10832	6.72488	13.4563	7.72703					4.35795	6.74301	3.34309	4.19154
		7.255	5.95	6.81	6.505	5.095						6.54	13.35	11.865	11.48	12.81	3.525	9.68	7.24	5.64	5.17
		7.475	9.86	7.32	9.56	7.485						7.315	15.345	17.745	13.59	16.33
	Mean	5.84421	8.83684	7.40711	6.41132	5.33237	6.61344	8.35406	5.85656	5.43844	5.40812	5.93289	11.8797	11.5911	10.9279	11.3511	6.01528	8.8725	7.72639	6.29528	5.67778
	SD	2.00139	3.2379	2.77193	2.71878	1.688	1.90904	3.0675	1.92147	2.9209	3.28948	1.80464	3.35605	3.06905	2.74061	3.09901	2.11851	2.7348	2.64659	2.35846	1.69217
	SEM	0.45915	0.742825	0.635923	0.623731	0.387254	0.477261	0.766876	0.480367	0.730225	0.822369	0.414012	0.769932	0.704087	0.628738	0.710962	0.499337	0.644598	0.623808	0.555894	0.398848
	CI	1.84144	2.36105	1.86325	0.973751	1.95637	2.79535	2.21905	2.01362	-0.40336	-1.17083	2.32362	5.16763	5.45296	5.44668	5.15303	1.77827	3.4029	2.43321	1.57836	2.29344
		9.84698	15.3126	12.951	11.8489	8.70837	10.4315	14.4891	9.6995	11.2802	11.9871	9.54217	18.5918	17.7291	16.4091	17.5491	10.2523	14.3421	13.0196	11.0122	9.06212
Statistics	Within-Subjects Factors																							Statistics	Descriptive Statistics															Statistics	Descriptive Statistics
	Measure:Mechanical sensitiviy																								AUC																Nocifension
	Time	Dependent Variable																							Subject	Day	Surgery	Treatment	Count	Mean	Standard Deviation	Coefficient of Variation									Surgery	Treatment	Count	Mean	Standard Deviation	Coefficient of Variation
	1	Day -1																							1.00	Day -2	Sham	Vehicle	1	5.01	.	.%									Endo	7daysTHC	10	1.165	1.07369	0.92162
	2	Day 7																								Day 7	Sham	Vehicle	1	8.46	.	.%										AcuteTHC	9	1.28	1.37352	1.07306
	3	Day 14																								Day 14	Sham	Vehicle	1	6.93	.	.%										Vehicle	12	2.82917	1.95276	0.690225
	4	Day 21																								Total	Sham	Vehicle	3	6.8	1.72867	0.254216										Total	31	1.84258	1.69837	0.921733
	5	Day 28																							2.00	Day -2	Sham	Vehicle	1	4.34	.	.%									Sham	Vehicle	12	1.22583	1.49657	1.22086
																										Day 7	Sham	Vehicle	1	8.08	.	.%									Total	Vehicle	24	2.0275	1.88826	0.931325
	Between-Subjects Factors																									Day 14	Sham	Vehicle	1	7.05	.	.%										Total	43	1.67047	1.65084	0.988251
			Value Label	N																						Total	Sham	Vehicle	3	6.49	1.93186	0.297668									Totals that are aggregated over either a single category of a variable or a split file variable are omitted.
	Surgery	0	Sham	35																					3.00	Day -2	Sham	Vehicle	1	6.69	.	.%
		1	Endo	37																						Day 7	Sham	Vehicle	1	6.11	.	.%									Model Dimensiona
	Treatment	2	Vehicle	38																						Day 14	Sham	Vehicle	1	4.35	.	.%											Number of Levels	Number of Parameters
		3	THC	34																						Total	Sham	Vehicle	3	5.71667	1.21858	0.213162									Fixed Effects	Intercept	1	1
																									4.00	Day -2	Sham	Vehicle	1	5.75	.	.%										Surgery	2	1
	Descriptive Statistics																									Day 7	Sham	Vehicle	1	8.82	.	.%										Treatment	3	2
		Surgery	Treatment	Mean	Std. Deviation	N																				Day 14	Sham	Vehicle	1	5.91	.	.%										Surgery * Treatment	4	0
	Day -1	Sham	Vehicle	5.84421	2.00139	19																				Total	Sham	Vehicle	3	6.82667	1.72813	0.253144									Residual			1
			THC	6.61344	1.90904	16																			5.00	Day -2	Sham	Vehicle	1	4.81	.	.%									Total		10	5
			Total	6.19586	1.96967	35																				Day 7	Sham	Vehicle	1	8.07	.	.%									a. Dependent Variable: Nocifension.
		Endo	Vehicle	5.93289	1.80464	19																				Day 14	Sham	Vehicle	1	6.93	.	.%
			THC	6.01528	2.11851	18																				Total	Sham	Vehicle	3	6.60333	1.65437	0.250535									Information Criteriaa
			Total	5.97297	1.93635	37																			6.00	Day -2	Sham	Vehicle	1	5.76	.	.%									-2 Restricted Log Likelihood	153.639
		Total	Vehicle	5.88855	1.88016	38																				Day 7	Sham	Vehicle	1	7.13	.	.%									Akaike's Information Criterion (AIC)	155.639
			THC	6.29676	2.01505	34																				Day 14	Sham	Vehicle	1	7.29	.	.%									Hurvich and Tsai's Criterion (AICC)	155.747
			Total	6.08132	1.94205	72																				Total	Sham	Vehicle	3	6.72667	0.840972	0.125021									Bozdogan's Criterion (CAIC)	158.303
	Day 7	Sham	Vehicle	8.83684	3.2379	19																			7.00	Day -2	Sham	Vehicle	1	4.55	.	.%									Schwarz's Bayesian Criterion (BIC)	157.303
			THC	8.35406	3.0675	16																				Day 7	Sham	Vehicle	1	7.68	.	.%									The information criteria are displayed in smaller-is-better forms.
			Total	8.61614	3.12429	35																				Day 14	Sham	Vehicle	1	6.34	.	.%									a. Dependent Variable: Nocifension.
		Endo	Vehicle	11.8797	3.35605	19																				Total	Sham	Vehicle	3	6.19	1.57038	0.253697
			THC	8.8725	2.7348	18																			8.00	Day -2	Sham	Vehicle	1	4.15	.	.%
			Total	10.4168	3.389	37																				Day 7	Sham	Vehicle	1	7.32	.	.%									Fixed Effects
		Total	Vehicle	10.3583	3.59959	38																				Day 14	Sham	Vehicle	1	4.73	.	.%
			THC	8.62853	2.86338	34																				Total	Sham	Vehicle	3	5.4	1.68787	0.312568									Type III Tests of Fixed Effectsa
			Total	9.54146	3.36441	72																			9.00	Day -2	Sham	Vehicle	1	4.62	.	.%									Source	Numerator df	Denominator df	F	Sig.
	Day 14	Sham	Vehicle	7.40711	2.77193	19																				Day 7	Sham	Vehicle	1	8.23	.	.%									Intercept	1	39	29.0013	3.69039e-06
			THC	5.85656	1.92147	16																				Day 14	Sham	Vehicle	1	5.01	.	.%									Surgery	1	39	6.53485	0.0145861
			Total	6.69829	2.51213	35																				Total	Sham	Vehicle	3	5.95333	1.98127	0.3328									Treatment	2	39	4.05034	0.0252191
		Endo	Vehicle	11.5911	3.06905	19																			10.00	Day -2	Sham	Vehicle	1	6.34	.	.%									Surgery * Treatment	0	.	.	.
			THC	7.72639	2.64659	18																				Day 7	Sham	Vehicle	1	7.55	.	.%									a. Dependent Variable: Nocifension.
			Total	9.71095	3.44267	37																				Day 14	Sham	Vehicle	1	6.9	.	.%
		Total	Vehicle	9.49908	3.57978	38																				Total	Sham	Vehicle	3	6.93	0.605558	0.087382
			THC	6.84647	2.48676	34																			11.00	Day -2	Sham	Vehicle	1	7.52	.	.%									Covariance Parameters
			Total	8.24646	3.36612	72																				Day 7	Sham	Vehicle	1	8.5	.	.%
	Day 21	Sham	Vehicle	6.41132	2.71878	19																				Day 14	Sham	Vehicle	1	7.36	.	.%									Estimates of Covariance Parametersa
			THC	5.43844	2.9209	16																				Total	Sham	Vehicle	3	7.79333	0.617198	0.0791956									Parameter	Estimate	Std. Error
			Total	5.96657	2.81408	35																			12.00	Day -2	Sham	Vehicle	1	7.52	.	.%									Residual	2.36028	0.534498
		Endo	Vehicle	10.9279	2.74061	19																				Day 7	Sham	Vehicle	1	8.53	.	.%									a. Dependent Variable: Nocifension.
			THC	6.29528	2.35846	18																				Day 14	Sham	Vehicle	1	7.68	.	.%
			Total	8.67419	3.44854	37																				Total	Sham	Vehicle	3	7.91	0.542863	0.0686299
		Total	Vehicle	8.66961	3.53379	38																			13.00	Day -2	Endo	Vehicle	1	5.75	.	.%									Estimated Marginal Means
			THC	5.89206	2.63285	34																				Day 7	Endo	Vehicle	1	13.39	.	.%
			Total	7.35799	3.41751	72																				Day 14	Endo	Vehicle	1	14.38	.	.%									1. Grand Meanb
	Day 28	Sham	Vehicle	5.33237	1.688	19																				Total	Endo	Vehicle	3	11.1733	4.72276	0.422681									Mean	Std. Error	df	95% Confidence Interval
			THC	5.40812	3.28948	16																			14.00	Day -2	Endo	Vehicle	1	4.73	.	.%												Lower Bound	Upper Bound
			Total	5.367	2.50674	35																				Day 7	Endo	Vehicle	1	10.38	.	.%									1.625a	0.236069	39	1.1475	2.1025
		Endo	Vehicle	11.3511	3.09901	19																				Day 14	Endo	Vehicle	1	13.56	.	.%									a. Based on modified population marginal mean. b. Dependent Variable: Nocifension.
			THC	5.67778	1.69217	18																				Total	Endo	Vehicle	3	9.55667	4.47221	0.467967
			Total	8.59108	3.79712	37																			15.00	Day -2	Endo	Vehicle	1	5.32	.	.%
		Total	Vehicle	8.34171	3.91908	38																				Day 7	Endo	Vehicle	1	14.93	.	.%									2. Surgery
			THC	5.55088	2.53224	34																				Day 14	Endo	Vehicle	1	13.74	.	.%
			Total	7.02382	3.59902	72																				Total	Endo	Vehicle	3	11.33	5.23871	0.462375									Estimatesb
																									16.00	Day -2	Endo	Vehicle	1	5.72	.	.%									Surgery	Mean	Std. Error	df	95% Confidence Interval
	Multivariate Testsc																									Day 7	Endo	Vehicle	1	12.26	.	.%													Lower Bound	Upper Bound
	Effect		Value	F	Hypothesis df	Error df	Sig.	Partial Eta Squared	Noncent. Parameter	Observed Powerb																Day 14	Endo	Vehicle	1	12.81	.	.%									Endo	1.75806	0.277883	39	1.19598	2.32013
	Time	Pillai's Trace	0.657277	31.164a	4	65	1.71858e-14	0.657277	124.657	1																Total	Endo	Vehicle	3	10.2633	3.94424	0.384304									Sham	1.226a	0.443497	39	0.328775	2.12289
		Wilks' Lambda	0.342723	31.164a	4	65	1.71858e-14	0.657277	124.657	1															17.00	Day -2	Endo	Vehicle	1	3.4	.	.%									a. Based on modified population marginal mean. b. Dependent Variable: Nocifension.
		Hotelling's Trace	1.91781	31.164a	4	65	1.71858e-14	0.657277	124.657	1																Day 7	Endo	Vehicle	1	11.83	.	.%
		Roy's Largest Root	1.91781	31.164a	4	65	1.71858e-14	0.657277	124.657	1																Day 14	Endo	Vehicle	1	11.83	.	.%									Pairwise Comparisonsd
	Time * Surgery	Pillai's Trace	0.338195	8.304a	4	65	1.78896e-05	0.338195	33.2162	0.997714																Total	Endo	Vehicle	3	9.02	4.86706	0.539586									(I) Surgery	(J) Surgery	Mean Difference (I-J)	Std. Error	df	Sig.b	95% Confidence Interval for Differenceb
		Wilks' Lambda	0.661805	8.304a	4	65	1.78896e-05	0.338195	33.2162	0.997714															18.00	Day -2	Endo	Vehicle	1	5.59	.	.%															Lower Bound	Upper Bound
		Hotelling's Trace	0.511018	8.304a	4	65	1.78896e-05	0.338195	33.2162	0.997714																Day 7	Endo	Vehicle	1	15.74	.	.%									Endo	Sham	.532a	0.523363	39	0.315455	-0.526379	1.59082
		Roy's Largest Root	0.511018	8.304a	4	65	1.78896e-05	0.338195	33.2162	0.997714																Day 14	Endo	Vehicle	1	16.64	.	.%									Sham	Endo	-.532c	0.523363	39	0.315455	-1.59082	0.526379
	Time * Treatment	Pillai's Trace	0.323357	7.766a	4	65	3.5296e-05	0.323357	31.0625	0.99609																Total	Endo	Vehicle	3	12.6567	6.13643	0.484838									Based on estimated marginal means
		Wilks' Lambda	0.676643	7.766a	4	65	3.5296e-05	0.323357	31.0625	0.99609															19.00	Day -2	Endo	Vehicle	1	6.74	.	.%									a. An estimate of the modified population marginal mean (J). b. Adjustment for multiple comparisons: Bonferroni. c. An estimate of the modified population marginal mean (I). d. Dependent Variable: Nocifension.
		Hotelling's Trace	0.477884	7.766a	4	65	3.5296e-05	0.323357	31.0625	0.99609																Day 7	Endo	Vehicle	1	11.24	.	.%
		Roy's Largest Root	0.477884	7.766a	4	65	3.5296e-05	0.323357	31.0625	0.99609																Day 14	Endo	Vehicle	1	12.99	.	.%									Univariate Testsa
	Time * Surgery * Treatment	Pillai's Trace	0.155384	2.990a	4	65	0.0250143	0.155384	11.958	0.767355																Total	Endo	Vehicle	3	10.3233	3.22426	0.312327									Numerator df	Denominator df	F	Sig.
		Wilks' Lambda	0.844616	2.990a	4	65	0.0250143	0.155384	11.958	0.767355															20.00	Day -2	Endo	Vehicle	1	6.5	.	.%									1	39	1.03414	0.315455
		Hotelling's Trace	0.183969	2.990a	4	65	0.0250143	0.155384	11.958	0.767355																Day 7	Endo	Vehicle	1	11.01	.	.%									The F tests the effect of Surgery. This test is based on the linearly independent pairwise comparisons among the estimated marginal means.
		Roy's Largest Root	0.183969	2.990a	4	65	0.0250143	0.155384	11.958	0.767355																Day 14	Endo	Vehicle	1	13.36	.	.%									a. Dependent Variable: Nocifension.
	a. Exact statistic b. Computed using alpha = .05 c. Design: Intercept + Surgery + Treatment + Surgery * Treatment Within Subjects Design: Time																									Total	Endo	Vehicle	3	10.29	3.48622	0.338796
																									21.00	Day -2	Endo	Vehicle	1	6.97	.	.%
	Mauchly's Test of Sphericityb																									Day 7	Endo	Vehicle	1	16.66	.	.%									3. Treatment
	Measure:Mechanicalsensitiviy																									Day 14	Endo	Vehicle	1	11.48	.	.%
	Within Subjects Effect	Mauchly's W	Approx. Chi-Square	df	Sig.	Epsilona																				Total	Endo	Vehicle	3	11.7033	4.84886	0.414314									Estimatesb
						Greenhouse-Geisser	Huynh-Feldt	Lower-bound																	22.00	Day -2	Endo	Vehicle	1	4.9	.	.%									Treatment	Mean	Std. Error	df	95% Confidence Interval
	Time	0.786784	15.9268	9	0.0685034	0.89901	0.997279	0.25																		Day 7	Endo	Vehicle	1	11.82	.	.%													Lower Bound	Upper Bound
	Tests the null hypothesis that the error covariance matrix of the orthonormalized transformed dependent variables is proportional to an identity matrix.																									Day 14	Endo	Vehicle	1	15.19	.	.%									7daysTHC	1.165a	0.485827	39	0.182322	2.14768
	a. May be used to adjust the degrees of freedom for the averaged tests of significance. Corrected tests are displayed in the Tests of Within-Subjects Effects table. b. Design: Intercept + Surgery + Treatment + Surgery * Treatment Within Subjects Design: Time																									Total	Endo	Vehicle	3	10.6367	5.24607	0.493206									AcuteTHC	1.280a	0.512107	39	0.244167	2.31583
																									23.00	Day -2	Endo	Vehicle	1	4.73	.	.%									Vehicle	2.0275	0.3136	39	1.39318	2.66182
	Tests of Within-Subjects Effects																									Day 7	Endo	Vehicle	1	11.05	.	.%									a. Based on modified population marginal mean. b. Dependent Variable: Nocifension.
	Measure:Mechanicalsensitiviy																									Day 14	Endo	Vehicle	1	10.53	.	.%
	Source		Type III Sum of Squares	df	Mean Square	F	Sig.	Partial Eta Squared	Noncent. Parameter	Observed Powera																Total	Endo	Vehicle	3	8.77	3.50839	0.400044									Pairwise Comparisonsd
	Time	Sphericity Assumed	475.812	4	118.953	33.3542	1.22228e-22	0.329086	133.417	1															24.00	Day -2	Endo	Vehicle	1	5.36	.	.%									(I) Treatment	(J) Treatment	Mean Difference (I-J)	Std. Error	df	Sig.c	95% Confidence Interval for Differencec
		Greenhouse-Geisser	475.812	3.59604	132.315	33.3542	1.34039e-20	0.329086	119.943	1																Day 7	Endo	Vehicle	1	9.87	.	.%															Lower Bound	Upper Bound
		Huynh-Feldt	475.812	3.98912	119.277	33.3542	1.38709e-22	0.329086	133.054	1																Day 14	Endo	Vehicle	1	12.81	.	.%									7daysTHC	AcuteTHC	-.115a,b	0.70589	39	1	-1.8809	1.6509
		Lower-bound	475.812	1	475.812	33.3542	2.09053e-07	0.329086	33.3542	0.999905																Total	Endo	Vehicle	3	9.34667	3.75247	0.401477										Vehicle	-.863a	0.57825	39	0.431571	-2.30908	0.584083
	Time * Surgery	Sphericity Assumed	142.177	4	35.5442	9.96655	1.53512e-07	0.127831	39.8662	0.999782															25.00	Day -2	Endo	AcuteTHC	1	6.3	.	.%									AcuteTHC	7daysTHC	.115a,b	0.70589	39	1	-1.6509	1.8809
		Greenhouse-Geisser	142.177	3.59604	39.5371	9.96655	5.52752e-07	0.127831	35.8401	0.99946																Day 7	Endo	AcuteTHC	1	13.56	.	.%										Vehicle	-.748a	0.600498	39	0.661901	-2.24974	0.754741
		Huynh-Feldt	142.177	3.98912	35.6412	9.96655	1.58896e-07	0.127831	39.7577	0.999776																Day 14	Endo	AcuteTHC	1	6.7	.	.%									Vehicle	7daysTHC	.863b	0.57825	39	0.431571	-0.584083	2.30908
		Lower-bound	142.177	1	142.177	9.96655	0.00237672	0.127831	9.96655	0.875367																Total	Endo	AcuteTHC	3	8.85333	4.081	0.460956										AcuteTHC	.748b	0.600498	39	0.661901	-0.754741	2.24974
	Time * Treatment	Sphericity Assumed	138.01	4	34.5025	9.67444	2.49566e-07	0.124551	38.6977	0.999695															26.00	Day -2	Endo	AcuteTHC	1	5.6	.	.%									Based on estimated marginal means
		Greenhouse-Geisser	138.01	3.59604	38.3783	9.67444	8.57797e-07	0.124551	34.7897	0.999273																Day 7	Endo	AcuteTHC	1	10.77	.	.%									a. An estimate of the modified population marginal mean (I). b. An estimate of the modified population marginal mean (J). c. Adjustment for multiple comparisons: Bonferroni. d. Dependent Variable: Nocifension.
		Huynh-Feldt	138.01	3.98912	34.5966	9.67444	2.57995e-07	0.124551	38.5925	0.999688																Day 14	Endo	AcuteTHC	1	3.76	.	.%
		Lower-bound	138.01	1	138.01	9.67444	0.00272991	0.124551	9.67444	0.865679																Total	Endo	AcuteTHC	3	6.71	3.63443	0.541644									Univariate Testsa
	Time * Surgery * Treatment	Sphericity Assumed	62.8645	4	15.7161	4.40678	0.00181406	0.0608614	17.6271	0.933863															27.00	Day -2	Endo	AcuteTHC	1	5.13	.	.%									Numerator df	Denominator df	F	Sig.
		Greenhouse-Geisser	62.8645	3.59604	17.4816	4.40678	0.0027259	0.0608614	15.847	0.912798																Day 7	Endo	AcuteTHC	1	9.83	.	.%									2	39	1.48001	0.240139
		Huynh-Feldt	62.8645	3.98912	15.759	4.40678	0.00183401	0.0608614	17.5792	0.933365																Day 14	Endo	AcuteTHC	1	5.95	.	.%									The F tests the effect of Treatment. This test is based on the linearly independent pairwise comparisons among the estimated marginal means.
		Lower-bound	62.8645	1	62.8645	4.40678	0.0395111	0.0608614	4.40678	0.543652																Total	Endo	AcuteTHC	3	6.97	2.51054	0.360192									a. Dependent Variable: Nocifension.
	Error(Time)	Sphericity Assumed	970.048	272	3.56635																				28.00	Day -2	Endo	AcuteTHC	1	4.15	.	.%
		Greenhouse-Geisser	970.048	244.531	3.96698																					Day 7	Endo	AcuteTHC	1	11.04	.	.%
		Huynh-Feldt	970.048	271.26	3.57608																					Day 14	Endo	AcuteTHC	1	6.11	.	.%									4. Surgery * Treatment
		Lower-bound	970.048	68	14.2654																					Total	Endo	AcuteTHC	3	7.1	3.55008	0.500012
	a. Computed using alpha = .05																								29.00	Day -2	Endo	AcuteTHC	1	5.76	.	.%									Estimatesb
																										Day 7	Endo	AcuteTHC	1	11.47	.	.%									Surgery	Treatment	Mean	Std. Error	df	95% Confidence Interval
	Tests of Within-Subjects Contrasts																									Day 14	Endo	AcuteTHC	1	6.74	.	.%														Lower Bound	Upper Bound
	Measure:Mechanicalsensitiviy																									Total	Endo	AcuteTHC	3	7.99	3.05334	0.382145									Endo	7daysTHC	1.165	0.485827	39	0.182322	2.14768
	Source	Time	Type III Sum of Squares	df	Mean Square	F	Sig.	Partial Eta Squared	Noncent. Parameter	Observed Powera															30.00	Day -2	Endo	AcuteTHC	1	4.73	.	.%										AcuteTHC	1.28	0.512107	39	0.244167	2.31583
	Time	Linear	2.05686	1	2.05686	0.415854	0.521183	0.00607833	0.415854	0.0974436																Day 7	Endo	AcuteTHC	1	11	.	.%										Vehicle	2.82917	0.443497	39	1.93211	3.72622
		Quadratic	247.691	1	247.691	59.8615	6.58033e-11	0.468174	59.8615	1																Day 14	Endo	AcuteTHC	1	6.22	.	.%									Sham	7daysTHC	.a	.	.	.	.
		Cubic	199.435	1	199.435	77.33	7.96184e-13	0.532099	77.33	1																Total	Endo	AcuteTHC	3	7.31667	3.2757	0.447704										AcuteTHC	.a	.	.	.	.
		Order 4	26.6282	1	26.6282	10.2316	0.00209745	0.130786	10.2316	0.88361															31.00	Day -2	Endo	AcuteTHC	1	5.36	.	.%										Vehicle	1.22583	0.443497	39	0.328775	2.12289
	Time * Surgery	Linear	106.304	1	106.304	21.4926	1.66167e-05	0.24016	21.4926	0.995469																Day 7	Endo	AcuteTHC	1	9.28	.	.%									a. This level combination of factors is not observed, thus the corresponding population marginal mean is not estimable. b. Dependent Variable: Nocifension.
		Quadratic	28.7728	1	28.7728	6.95375	0.0103559	0.0927739	6.95375	0.738796																Day 14	Endo	AcuteTHC	1	4.54	.	.%
		Cubic	4.51014	1	4.51014	1.74878	0.19046	0.0250726	1.74878	0.256401																Total	Endo	AcuteTHC	3	6.39333	2.53332	0.396245									Pairwise Comparisonsd
		Order 4	2.5896	1	2.5896	0.995019	0.322055	0.0144216	0.995019	0.166031															32.00	Day -2	Endo	AcuteTHC	1	5.95	.	.%									Treatment	(I) Surgery	(J) Surgery	Mean Difference (I-J)	Std. Error	df	Sig.b	95% Confidence Interval for Differenceb
	Time * Treatment	Linear	100.937	1	100.937	20.4075	2.56101e-05	0.230834	20.4075	0.993664																Day 7	Endo	AcuteTHC	1	9.64	.	.%																Lower Bound	Upper Bound
		Quadratic	34.8223	1	34.8223	8.41578	0.00500735	0.110131	8.41578	0.815896																Day 14	Endo	AcuteTHC	1	4.89	.	.%									7daysTHC	Endo	Sham	.a	.	.	.	.	.
		Cubic	2.20326	1	2.20326	0.854302	0.358607	0.0124074	0.854302	0.149205																Total	Endo	AcuteTHC	3	6.82667	2.4934	0.365244										Sham	Endo	.c	.	.	.	.	.
		Order 4	0.0467747	1	0.0467747	0.0179726	0.89375	0.000264233	0.0179726	0.0520038															33.00	Day -2	Endo	AcuteTHC	1	5.72	.	.%									AcuteTHC	Endo	Sham	.a	.	.	.	.	.
	Time * Surgery * Treatment	Linear	56.7708	1	56.7708	11.4779	0.00117492	0.144416	11.4779	0.916163																Day 7	Endo	AcuteTHC	1	11.48	.	.%										Sham	Endo	.c	.	.	.	.	.
		Quadratic	1.35641	1	1.35641	0.327815	0.568837	0.00479767	0.327815	0.0872322																Day 14	Endo	AcuteTHC	1	6.11	.	.%									Vehicle	Endo	Sham	1.603*	0.6272	39	0.0145861	0.334702	2.87196
		Cubic	3.48971	1	3.48971	1.35312	0.2488	0.0195105	1.35312	0.209022																Total	Endo	AcuteTHC	3	7.77	3.21887	0.414269										Sham	Endo	-1.603*	0.6272	39	0.0145861	-2.87196	-0.334702
		Order 4	1.24759	1	1.24759	0.479369	0.491066	0.0070002	0.479369	0.104856															34.00	Day -2	Endo	7daysTHC	1	6.58	.	.%									Based on estimated marginal means
	Error(Time)	Linear	336.335	68	4.9461																					Day 7	Endo	7daysTHC	1	12.38	.	.%									a. The level combination of factors in (J) is not observed. b. Adjustment for multiple comparisons: Bonferroni. c. The level combination of factors in (I) is not observed. *. The mean difference is significant at the .05 level. d. Dependent Variable: Nocifension.
		Quadratic	281.366	68	4.13774																					Day 14	Endo	7daysTHC	1	6.14	.	.%
		Cubic	175.373	68	2.57901																					Total	Endo	7daysTHC	3	8.36667	3.4826	0.416248									Univariate Testsa
		Order 4	176.974	68	2.60256																				35.00	Day -2	Endo	7daysTHC	1	4.5	.	.%									Treatment	Numerator df	Denominator df	F	Sig.
	a. Computed using alpha = .05																									Day 7	Endo	7daysTHC	1	11.01	.	.%									7daysTHC	0	.	.	.
																										Day 14	Endo	7daysTHC	1	4.93	.	.%									AcuteTHC	0	.	.	.
	Tests of Between-Subjects Effects																									Total	Endo	7daysTHC	3	6.81333	3.64077	0.53436									Vehicle	1	39	6.53485	0.0145861
	Measure:Mechanicalsensitiviy Transformed Variable:Average																								36.00	Day -2	Endo	7daysTHC	1	4.54	.	.%									Each F tests the simple effects of Surgery within each level combination of the other effects shown. These tests are based on the estimable linearly independent pairwise comparisons among the estimated marginal means.
	Source	Type III Sum of Squares	df	Mean Square	F	Sig.	Partial Eta Squared	Noncent. Parameter	Observed Powera																	Day 7	Endo	7daysTHC	1	12.93	.	.%									a. Dependent Variable: Nocifension.
	Intercept	20629.6	1	20629.6	1031.78	7.91549e-43	0.938169	1031.78	1																	Day 14	Endo	7daysTHC	1	6.66	.	.%
	Surgery	386.25	1	386.25	19.3181	3.97885e-05	0.221238	19.3181	0.991164																	Total	Endo	7daysTHC	3	8.04333	4.36271	0.542401
	Treatment	332.097	1	332.097	16.6097	0.000122493	0.196309	16.6097	0.980173																37.00	Day -2	Endo	7daysTHC	1	6.18	.	.%									5. Surgery * Treatment
	Surgery * Treatment	199.742	1	199.742	9.98998	0.00235054	0.128093	9.98998	0.876116																	Day 7	Endo	7daysTHC	1	12.15	.	.%
	Error	1359.61	68	19.9942																						Day 14	Endo	7daysTHC	1	5.32	.	.%									Estimatesb
	a. Computed using alpha = .05																									Total	Endo	7daysTHC	3	7.88333	3.71998	0.471879									Surgery	Treatment	Mean	Std. Error	df	95% Confidence Interval
																									38.00	Day -2	Endo	7daysTHC	1	6.34	.	.%														Lower Bound	Upper Bound
																										Day 7	Endo	7daysTHC	1	15.16	.	.%									Endo	7daysTHC	1.165	0.485827	39	0.182322	2.14768
	Estimated Marginal Means																									Day 14	Endo	7daysTHC	1	7.68	.	.%										AcuteTHC	1.28	0.512107	39	0.244167	2.31583
																										Total	Endo	7daysTHC	3	9.72667	4.75287	0.488643										Vehicle	2.82917	0.443497	39	1.93211	3.72622
	1. Grand Mean																								39.00	Day -2	Endo	7daysTHC	1	7.33	.	.%									Sham	7daysTHC	.a	.	.	.	.
	Measure:Mechanicalsensitiviy																									Day 7	Endo	7daysTHC	1	12.81	.	.%										AcuteTHC	.a	.	.	.	.
	Mean	Std. Error	95% Confidence Interval																							Day 14	Endo	7daysTHC	1	7.64	.	.%										Vehicle	1.22583	0.443497	39	0.328775	2.12289
			Lower Bound	Upper Bound																						Total	Endo	7daysTHC	3	9.26	3.07829	0.332429									a. This level combination of factors is not observed, thus the corresponding population marginal mean is not estimable. b. Dependent Variable: Nocifension.
	7.58862	0.236249	7.11719	8.06004																					40.00	Day -2	Endo	7daysTHC	1	4.97	.	.%
																										Day 7	Endo	7daysTHC	1	10.11	.	.%									Pairwise Comparisonsd
																										Day 14	Endo	7daysTHC	1	5.09	.	.%									Surgery	(I) Treatment	(J) Treatment	Mean Difference (I-J)	Std. Error	df	Sig.a	95% Confidence Interval for Differencea
	2. Surgery																									Total	Endo	7daysTHC	3	6.72333	2.93355	0.436324																Lower Bound	Upper Bound
																									41.00	Day -2	Endo	7daysTHC	1	3.91	.	.%									Endo	7daysTHC	AcuteTHC	-0.115	0.70589	39	1	-1.8809	1.6509
	Estimates																									Day 7	Endo	7daysTHC	1	9.91	.	.%											Vehicle	-1.664*	0.657813	39	0.0466871	-3.30979	-0.0185442
	Measure:Mechanicalsensitiviy																									Day 14	Endo	7daysTHC	1	5.4	.	.%										AcuteTHC	7daysTHC	0.115	0.70589	39	1	-1.6509	1.8809
	Surgery	Mean	Std. Error	95% Confidence Interval																						Total	Endo	7daysTHC	3	6.40667	3.12411	0.487633											Vehicle	-1.54917	0.677453	39	0.0831647	-3.24392	0.14559
				Lower Bound	Upper Bound																				42.00	Day -2	Endo	7daysTHC	1	5.37	.	.%										Vehicle	7daysTHC	1.664*	0.657813	39	0.0466871	0.0185442	3.30979
	Sham	6.55025	0.339261	5.87326	7.22723																					Day 7	Endo	7daysTHC	1	10.07	.	.%											AcuteTHC	1.54917	0.677453	39	0.0831647	-0.14559	3.24392
	Endo	8.62699	0.32887	7.97073	9.28324																					Day 14	Endo	7daysTHC	1	4.34	.	.%									Sham	7daysTHC	AcuteTHC	.b,c	.	.	.	.	.
																										Total	Endo	7daysTHC	3	6.59333	3.05461	0.463287											Vehicle	.b	.	.	.	.	.
	Pairwise Comparisons																								43.00	Day -2	Endo	7daysTHC	1	7.16	.	.%										AcuteTHC	7daysTHC	.b,c	.	.	.	.	.
	Measure:Mechanicalsensitiviy																									Day 7	Endo	7daysTHC	1	13.99	.	.%											Vehicle	.b	.	.	.	.	.
	(I) Surgery	(J) Surgery	Mean Difference (I-J)	Std. Error	Sig.a	95% Confidence Interval for Differencea																				Day 14	Endo	7daysTHC	1	8.82	.	.%										Vehicle	7daysTHC	.c	.	.	.	.	.
						Lower Bound	Upper Bound																			Total	Endo	7daysTHC	3	9.99	3.56215	0.356571											AcuteTHC	.c	.	.	.	.	.
	Sham	Endo	-2.077*	0.472498	3.97885e-05	-3.01959	-1.13388																		Total	Day -2	Endo	7daysTHC	10	5.688	1.1941	0.209934									Based on estimated marginal means
	Endo	Sham	2.077*	0.472498	3.97885e-05	1.13388	3.01959																					AcuteTHC	9	5.41111	0.65853	0.121699									a. Adjustment for multiple comparisons: Bonferroni. *. The mean difference is significant at the .05 level. b. The level combination of factors in (I) is not observed. c. The level combination of factors in (J) is not observed. d. Dependent Variable: Nocifension.
	Based on estimated marginal means																											Vehicle	12	5.47583	0.991706	0.181106
	*. The mean difference is significant at the .05 level. a. Adjustment for multiple comparisons: Bonferroni.																											Total	31	5.52548	0.957983	0.173375									Univariate Testsa
																											Sham	Vehicle	12	5.58833	1.20152	0.215005									Surgery	Numerator df	Denominator df	F	Sig.
	Univariate Tests																										Total	Vehicle	24	5.53208	1.07894	0.195033									Endo	2	39	4.05034	0.0252191
	Measure:Mechanicalsensitiviy																											Total	43	5.54302	1.01707	0.183487									Sham	0	.	.	.
		Sum of Squares	df	Mean Square	F	Sig.	Partial Eta Squared	Noncent. Parameter	Observed Powera																	Day 7	Endo	7daysTHC	10	12.052	1.77175	0.147008									Each F tests the simple effects of Treatment within each level combination of the other effects shown. These tests are based on the estimable linearly independent pairwise comparisons among the estimated marginal means.
	Contrast	77.25	1	77.25	19.3181	3.97885e-05	0.221238	19.3181	0.991164																			AcuteTHC	9	10.8967	1.28161	0.117615									a. Dependent Variable: Nocifension.
	Error	271.921	68	3.99884																								Vehicle	12	12.515	2.19064	0.175041
	The F tests the effect of Surgery. This test is based on the linearly independent pairwise comparisons among the estimated marginal means.																											Total	31	11.8958	1.89745	0.159506
	a. Computed using alpha = .05																										Sham	Vehicle	12	7.87333	0.761748	0.0967504
																											Total	Vehicle	24	10.1942	2.86236	0.280784
																												Total	43	10.7733	2.46098	0.228434
	3. Treatment																									Day 14	Endo	7daysTHC	10	6.202	1.45536	0.234659
																												AcuteTHC	9	5.66889	1.03122	0.181908
	Estimates																											Vehicle	12	13.2767	1.648	0.124127
	Measure:Mechanicalsensitiviy																											Total	31	8.78581	3.88868	0.44261
	Treatment	Mean	Std. Error	95% Confidence Interval																							Sham	Vehicle	12	6.37333	1.11783	0.175392
				Lower Bound	Upper Bound																						Total	Vehicle	24	9.825	3.7853	0.385273
	Vehicle	8.55145	0.324396	7.90413	9.19877																							Total	43	8.11256	3.51104	0.432791
	THC	6.62578	0.343542	5.94026	7.31131																					Total	Endo	7daysTHC	30	7.98067	3.27006	0.409747
																												AcuteTHC	27	7.32556	2.75666	0.376308
	Pairwise Comparisons																											Vehicle	36	10.4225	3.9185	0.375966
	Measure:Mechanicalsensitiviy																											Total	93	8.7357	3.63904	0.416571
	(I) Treatment	(J) Treatment	Mean Difference (I-J)	Std. Error	Sig.a	95% Confidence Interval for Differencea																					Sham	Vehicle	36	6.61167	1.39753	0.211373
						Lower Bound	Upper Bound																				Total	Vehicle	72	8.51708	3.49482	0.41033
	Vehicle	THC	1.926*	0.472498	0.000122493	0.982809	2.86852																					Total	129	8.14295	3.31164	0.406688
	THC	Vehicle	-1.926*	0.472498	0.000122493	-2.86852	-0.982809																		Totals that are aggregated over either a single category of a variable or a split file variable are omitted.
	Based on estimated marginal means
	*. The mean difference is significant at the .05 level. a. Adjustment for multiple comparisons: Bonferroni.																								Model Dimensiona
																											Number of Levels	Covariance Structure	Number of Parameters	Subject Variables	Number of Subjects
	Univariate Tests																								Fixed Effects	Intercept	1		1
	Measure:Mechanicalsensitiviy																									Surgery	2		1
		Sum of Squares	df	Mean Square	F	Sig.	Partial Eta Squared	Noncent. Parameter	Observed Powera																	Treatment	3		2
	Contrast	66.4195	1	66.4195	16.6097	0.000122493	0.196309	16.6097	0.980173																	Day	3		2
	Error	271.921	68	3.99884																						Surgery * Treatment	4		0
	The F tests the effect of Treatment. This test is based on the linearly independent pairwise comparisons among the estimated marginal means.																									Surgery * Day	6		2
	a. Computed using alpha = .05																									Treatment * Day	9		4
																										Surgery * Treatment * Day	12		0
																									Repeated Effects	Day	3	Diagonal	3	Subject	43
	4. Time																								Total		43		15
																									a. Dependent Variable: AUC.
	Estimates
	Measure:Mechanicalsensitiviy																								Information Criteriaa
	Time	Mean	Std. Error	95% Confidence Interval																					-2 Restricted Log Likelihood	424.66
				Lower Bound	Upper Bound																				Akaike's Information Criterion (AIC)	430.66
	1	6.10146	0.231759	5.63899	6.56392																				Hurvich and Tsai's Criterion (AICC)	430.873
	2	9.48579	0.367988	8.75148	10.2201																				Bozdogan's Criterion (CAIC)	441.947
	3	8.14528	0.314636	7.51743	8.77312																				Schwarz's Bayesian Criterion (BIC)	438.947
	4	7.26823	0.31739	6.63489	7.90157																				The information criteria are displayed in smaller-is-better forms.
	5	6.94233	0.298859	6.34597	7.53869																				a. Dependent Variable: AUC.
	Pairwise Comparisons
	Measure:Mechanicalsensitiviy																								Fixed Effects
	(I) Time	(J) Time	Mean Difference (I-J)	Std. Error	Sig.a	95% Confidence Interval for Differencea
						Lower Bound	Upper Bound																		Type III Tests of Fixed Effectsa
	1	2	-3.384*	0.327719	1.44299e-14	-4.33521	-2.43345																		Source	Numerator df	Denominator df	F	Sig.
		3	-2.044*	0.306199	5.43797e-08	-2.93226	-1.15538																		Intercept	1	105.616	3377.53	5.24873e-82
		4	-1.167*	0.32777	0.00682616	-2.11781	-0.215747																		Surgery	1	105.616	142.416	2.66999e-21
		5	-0.840876	0.363415	0.237072	-1.89533	0.213578																		Treatment	2	105.616	47.1868	2.27772e-15
	2	1	3.384*	0.327719	1.44299e-14	2.43345	4.33521																		Day	2	84.4414	109.872	3.16707e-24
		3	1.341*	0.280694	9.91789e-05	0.526072	2.15494																		Surgery * Treatment	0	.	.	.
		4	2.218*	0.27927	2.80994e-10	1.40725	3.02786																		Surgery * Day	2	84.4414	54.5312	6.23582e-16
		5	2.543*	0.360843	1.15933e-08	1.49646	3.59045																		Treatment * Day	4	84.4414	36.337	1.21925e-17
	3	1	2.044*	0.306199	5.43797e-08	1.15538	2.93226																		Surgery * Treatment * Day	0	.	.	.
		2	-1.341*	0.280694	9.91789e-05	-2.15494	-0.526072																		a. Dependent Variable: AUC.
		4	.877*	0.25426	0.0096914	0.139306	1.61479
		5	1.203*	0.339175	0.00711761	0.218825	2.18707
	4	1	1.167*	0.32777	0.00682616	0.215747	2.11781																		Covariance Parameters
		2	-2.218*	0.27927	2.80994e-10	-3.02786	-1.40725
		3	-.877*	0.25426	0.0096914	-1.61479	-0.139306																		Estimates of Covariance Parametersa
		5	0.3259	0.296993	1	-0.535828	1.18763																		Parameter		Estimate	Std. Error
	5	1	0.840876	0.363415	0.237072	-0.213578	1.89533																		Repeated Measures	Var: [Day=Day -2]	1.10258	0.249686
		2	-2.543*	0.360843	1.15933e-08	-3.59045	-1.49646																			Var: [Day=Day 7]	2.57853	0.583922
		3	-1.203*	0.339175	0.00711761	-2.18707	-0.218825																			Var: [Day=Day 14]	1.82538	0.413367
		4	-0.3259	0.296993	1	-1.18763	0.535828																		a. Dependent Variable: AUC.
	Based on estimated marginal means
	*. The mean difference is significant at the .05 level. a. Adjustment for multiple comparisons: Bonferroni.
																									Estimated Marginal Means
	Multivariate Tests
		Value	F	Hypothesis df	Error df	Sig.	Partial Eta Squared	Noncent. Parameter	Observed Powerb																1. Grand Meanb
	Pillai's trace	0.657277	31.164a	4	65	1.71858e-14	0.657277	124.657	1																Mean	Std. Error	df	95% Confidence Interval
	Wilks' lambda	0.342723	31.164a	4	65	1.71858e-14	0.657277	124.657	1																			Lower Bound	Upper Bound
	Hotelling's trace	1.91781	31.164a	4	65	1.71858e-14	0.657277	124.657	1																8.085a	0.120192	105.616	7.8468	8.3234
	Roy's largest root	1.91781	31.164a	4	65	1.71858e-14	0.657277	124.657	1																a. Based on modified population marginal mean. b. Dependent Variable: AUC.
	Each F tests the multivariate effect of Time. These tests are based on the linearly independent pairwise comparisons among the estimated marginal means.
	a. Exact statistic b. Computed using alpha = .05
																									2. Surgery
	5. Surgery * Treatment																								Estimatesb
																									Surgery	Mean	Std. Error	df	95% Confidence Interval
	Estimates																												Lower Bound	Upper Bound
	Measure:Mechanicalsensitiviy																								Endo	8.57624	0.141481	105.616	8.29573	8.85675
	Surgery	Treatment	Mean	Std. Error	95% Confidence Interval																				Sham	6.612a	0.225801	105.616	6.16398	7.05936
					Lower Bound	Upper Bound																			a. Based on modified population marginal mean. b. Dependent Variable: AUC.
	Sham	Vehicle	6.76637	0.458765	5.85092	7.68182
		THC	6.33413	0.499927	5.33654	7.33171																			Pairwise Comparisonsd
	Endo	Vehicle	10.3365	0.458765	9.42108	11.252																			(I) Surgery	(J) Surgery	Mean Difference (I-J)	Std. Error	df	Sig.b	95% Confidence Interval for Differenceb
		THC	6.91744	0.471336	5.97691	7.85798																									Lower Bound	Upper Bound
																									Endo	Sham	1.965*,a	0.266463	105.616	3.92307e-11	1.43626	2.49289
	Pairwise Comparisons																								Sham	Endo	-1.965*,c	0.266463	105.616	3.92307e-11	-2.49289	-1.43626
	Measure:Mechanicalsensitiviy																								Based on estimated marginal means
	Treatment	(I) Surgery	(J) Surgery	Mean Difference (I-J)	Std. Error	Sig.a	95% Confidence Interval for Differencea																		*. The mean difference is significant at the .05 level. a. An estimate of the modified population marginal mean (J). b. Adjustment for multiple comparisons: Bonferroni. c. An estimate of the modified population marginal mean (I). d. Dependent Variable: AUC.
							Lower Bound	Upper Bound
	Vehicle	Sham	Endo	-3.570*	0.648792	6.13977e-07	-4.8648	-2.27551																	Univariate Testsa
		Endo	Sham	3.570*	0.648792	6.13977e-07	2.27551	4.8648																	Numerator df	Denominator df	F	Sig.
	THC	Sham	Endo	-0.583319	0.687085	0.398873	-1.95438	0.787736																	1	105.616	54.3577	3.92307e-11
		Endo	Sham	0.583319	0.687085	0.398873	-0.787736	1.95438																	The F tests the effect of Surgery. This test is based on the linearly independent pairwise comparisons among the estimated marginal means.
	Based on estimated marginal means																								a. Dependent Variable: AUC.
	*. The mean difference is significant at the .05 level. a. Adjustment for multiple comparisons: Bonferroni.
	Univariate Tests																								3. Treatment
	Measure:Mechanicalsensitiviy
	Treatment		Sum of Squares	df	Mean Square	F	Sig.	Partial Eta Squared	Noncent. Parameter	Observed Powera															Estimatesb
	Vehicle	Contrast	121.087	1	121.087	30.2806	6.13977e-07	0.308104	30.2806	0.999734															Treatment	Mean	Std. Error	df	95% Confidence Interval
		Error	271.921	68	3.99884																								Lower Bound	Upper Bound
	THC	Contrast	2.88222	1	2.88222	0.720763	0.398873	0.0104883	0.720763	0.133313															7daysTHC	7.981a	0.247352	105.616	7.49025	8.47109
		Error	271.921	68	3.99884																				AcuteTHC	7.326a	0.260732	105.616	6.80861	7.8425
	Each F tests the simple effects of Surgery within each level combination of the other effects shown. These tests are based on the linearly independent pairwise comparisons among the estimated marginal means.																								Vehicle	8.51708	0.159665	105.616	8.20052	8.83365
	a. Computed using alpha = .05																								a. Based on modified population marginal mean. b. Dependent Variable: AUC.
																									Pairwise Comparisonsd
	6. Surgery * Treatment																								(I) Treatment	(J) Treatment	Mean Difference (I-J)	Std. Error	df	Sig.c	95% Confidence Interval for Differencec
																															Lower Bound	Upper Bound
	Estimates																								7daysTHC	AcuteTHC	.655a,b	0.359395	105.616	0.21348	-0.219192	1.52941
	Measure:Mechanicalsensitiviy																									Vehicle	-.536a	0.294408	105.616	0.213847	-1.25263	0.179793
	Surgery	Treatment	Mean	Std. Error	95% Confidence Interval																				AcuteTHC	7daysTHC	-.655a,b	0.359395	105.616	0.21348	-1.52941	0.219192
					Lower Bound	Upper Bound																				Vehicle	-1.192a,*	0.305736	105.616	0.000513245	-1.93529	-0.447762
	Sham	Vehicle	6.76637	0.458765	5.85092	7.68182																			Vehicle	7daysTHC	.536b	0.294408	105.616	0.213847	-0.179793	1.25263
		THC	6.33413	0.499927	5.33654	7.33171																				AcuteTHC	1.192b,*	0.305736	105.616	0.000513245	0.447762	1.93529
	Endo	Vehicle	10.3365	0.458765	9.42108	11.252																			Based on estimated marginal means
		THC	6.91744	0.471336	5.97691	7.85798																			a. An estimate of the modified population marginal mean (I). b. An estimate of the modified population marginal mean (J). c. Adjustment for multiple comparisons: Bonferroni. *. The mean difference is significant at the .05 level. d. Dependent Variable: AUC.
	Pairwise Comparisons																								Univariate Testsa
	Measure:Mechanicalsensitiviy																								Numerator df	Denominator df	F	Sig.
	Surgery	(I) Treatment	(J) Treatment	Mean Difference (I-J)	Std. Error	Sig.a	95% Confidence Interval for Differencea																		2	105.616	7.87469	0.000648992
							Lower Bound	Upper Bound																	The F tests the effect of Treatment. This test is based on the linearly independent pairwise comparisons among the estimated marginal means.
	Sham	Vehicle	THC	0.432243	0.678522	0.52624	-0.921727	1.78621																	a. Dependent Variable: AUC.
		THC	Vehicle	-0.432243	0.678522	0.52624	-1.78621	0.921727
	Endo	Vehicle	THC	3.419*	0.657741	2.00476e-06	2.10658	4.73158
		THC	Vehicle	-3.419*	0.657741	2.00476e-06	-4.73158	-2.10658																	4. Day
	Based on estimated marginal means
	a. Adjustment for multiple comparisons: Bonferroni. *. The mean difference is significant at the .05 level.																								Estimatesb
																									Day	Mean	Std. Error	df	95% Confidence Interval
	Univariate Tests																												Lower Bound	Upper Bound
	Measure:Mechanicalsensitiviy																								Day -2	5.541a	0.161348	39	5.21446	5.86718
	Surgery		Sum of Squares	df	Mean Square	F	Sig.	Partial Eta Squared	Noncent. Parameter	Observed Powera															Day 7	10.834a	0.246743	39	10.3352	11.3333
	Sham	Contrast	1.62279	1	1.62279	0.405815	0.52624	0.00593247	0.405815	0.0962754															Day 14	7.880a	0.207604	39	7.4603	8.30014
		Error	271.921	68	3.99884																				a. Based on modified population marginal mean. b. Dependent Variable: AUC.
	Endo	Contrast	108.055	1	108.055	27.0215	2.00476e-06	0.284372	27.0215	0.999221
		Error	271.921	68	3.99884																				Pairwise Comparisonsd
	Each F tests the simple effects of Treatment within each level combination of the other effects shown. These tests are based on the linearly independent pairwise comparisons among the estimated marginal means.																								(I) Day	(J) Day	Mean Difference (I-J)	Std. Error	df	Sig.c	95% Confidence Interval for Differencec
	a. Computed using alpha = .05																														Lower Bound	Upper Bound
																									Day -2	Day 7	-5.293*,a,b	0.294814	67.1972	7.23449e-27	-6.01731	-4.56955
																										Day 14	-2.339*,a,b	0.26293	73.5197	8.21569e-13	-2.98358	-1.69523
	7. Surgery * Time																								Day 7	Day -2	5.293*,a,b	0.294814	67.1972	7.23449e-27	4.56955	6.01731
																										Day 14	2.954*,a,b	0.322461	75.7835	2.02029e-13	2.16455	3.7435
	Estimates																								Day 14	Day -2	2.339*,a,b	0.26293	73.5197	8.21569e-13	1.69523	2.98358
	Measure:Mechanicalsensitiviy																									Day 7	-2.954*,a,b	0.322461	75.7835	2.02029e-13	-3.7435	-2.16455
	Surgery	Time	Mean	Std. Error	95% Confidence Interval																				Based on estimated marginal means
					Lower Bound	Upper Bound																			*. The mean difference is significant at the .05 level. a. An estimate of the modified population marginal mean (I). b. An estimate of the modified population marginal mean (J). c. Adjustment for multiple comparisons: Bonferroni. d. Dependent Variable: AUC.
	Sham	1	6.22882	0.332814	5.5647	6.89294
		2	8.59545	0.528443	7.54096	9.64994																			Univariate Testsa
		3	6.63183	0.451828	5.73023	7.53344																			Numerator df	Denominator df	F	Sig.
		4	5.92488	0.455782	5.01538	6.83438																			2	88.5092	165.827	1.1611e-30
		5	5.37025	0.429171	4.51385	6.22664																			The F tests the effect of Day. This test is based on the linearly independent pairwise comparisons among the estimated marginal means.
	Endo	1	5.97409	0.322621	5.33031	6.61787																			a. Dependent Variable: AUC.
		2	10.3761	0.512258	9.35392	11.3983
		3	9.65872	0.437989	8.78473	10.5327
		4	8.61159	0.441823	7.72994	9.49323																			5. Surgery * Treatment
		5	8.51442	0.416026	7.68425	9.34458
																									Estimatesb
	Pairwise Comparisons																								Surgery	Treatment	Mean	Std. Error	df	95% Confidence Interval
	Measure:Mechanicalsensitiviy																													Lower Bound	Upper Bound
	Time	(I) Surgery	(J) Surgery	Mean Difference (I-J)	Std. Error	Sig.a	95% Confidence Interval for Differencea																		Endo	7daysTHC	7.98067	0.247352	105.616	7.49025	8.47109
							Lower Bound	Upper Bound																		AcuteTHC	7.32556	0.260732	105.616	6.80861	7.8425
	1	Sham	Endo	0.254738	0.463519	0.584412	-0.670199	1.17967																		Vehicle	10.4225	0.225801	105.616	9.97481	10.8702
		Endo	Sham	-0.254738	0.463519	0.584412	-1.17967	0.670199																	Sham	7daysTHC	.a	.	.	.	.
	2	Sham	Endo	-1.781*	0.735975	0.0182231	-3.24928	-0.31205																		AcuteTHC	.a	.	.	.	.
		Endo	Sham	1.781*	0.735975	0.0182231	0.31205	3.24928																		Vehicle	6.61167	0.225801	105.616	6.16398	7.05936
	3	Sham	Endo	-3.027*	0.629272	8.724e-06	-4.28258	-1.77119																	a. This level combination of factors is not observed, thus the corresponding population marginal mean is not estimable. b. Dependent Variable: AUC.
		Endo	Sham	3.027*	0.629272	8.724e-06	1.77119	4.28258
	4	Sham	Endo	-2.687*	0.634779	7.08897e-05	-3.95339	-1.42003																	Pairwise Comparisonsd
		Endo	Sham	2.687*	0.634779	7.08897e-05	1.42003	3.95339																	Treatment	(I) Surgery	(J) Surgery	Mean Difference (I-J)	Std. Error	df	Sig.b	95% Confidence Interval for Differenceb
	5	Sham	Endo	-3.144*	0.597717	1.57819e-06	-4.33689	-1.95144																								Lower Bound	Upper Bound
		Endo	Sham	3.144*	0.597717	1.57819e-06	1.95144	4.33689																	7daysTHC	Endo	Sham	.a	.	.	.	.	.
	Based on estimated marginal means																									Sham	Endo	.c	.	.	.	.	.
	a. Adjustment for multiple comparisons: Bonferroni. *. The mean difference is significant at the .05 level.																								AcuteTHC	Endo	Sham	.a	.	.	.	.	.
																										Sham	Endo	.c	.	.	.	.	.
	Univariate Tests																								Vehicle	Endo	Sham	3.811*	0.319331	105.616	2.66999e-21	3.1777	4.44396
	Measure:Mechanicalsensitiviy																									Sham	Endo	-3.811*	0.319331	105.616	2.66999e-21	-4.44396	-3.1777
	Time		Sum of Squares	df	Mean Square	F	Sig.	Partial Eta Squared	Noncent. Parameter	Observed Powera															Based on estimated marginal means
	1	Contrast	1.16231	1	1.16231	0.302031	0.584412	0.004422	0.302031	0.0842567															a. The level combination of factors in (J) is not observed. b. Adjustment for multiple comparisons: Bonferroni. c. The level combination of factors in (I) is not observed. *. The mean difference is significant at the .05 level. d. Dependent Variable: AUC.
		Error	261.685	68	3.8483
	2	Contrast	56.7937	1	56.7937	5.85381	0.0182231	0.0792621	5.85381	0.664668															Univariate Testsa
		Error	659.736	68	9.702																				Treatment	Numerator df	Denominator df	F	Sig.
	3	Contrast	164.107	1	164.107	23.1375	8.724e-06	0.253874	23.1375	0.997293															7daysTHC	0	.	.	.
		Error	482.303	68	7.0927																				AcuteTHC	0	.	.	.
	4	Contrast	129.293	1	129.293	17.9141	7.08897e-05	0.208512	17.9141	0.986519															Vehicle	1	105.616	142.416	2.66999e-21
		Error	490.783	68	7.2174																				Each F tests the simple effects of Surgery within each level combination of the other effects shown. These tests are based on the estimable linearly independent pairwise comparisons among the estimated marginal means.
	5	Contrast	177.071	1	177.071	27.6707	1.57819e-06	0.289229	27.6707	0.99937															a. Dependent Variable: AUC.
		Error	435.146	68	6.39921
	Each F tests the simple effects of Surgery within each level combination of the other effects shown. These tests are based on the linearly independent pairwise comparisons among the estimated marginal means.
	a. Computed using alpha = .05																								6. Surgery * Treatment
																									Estimatesb
	8. Surgery * Time																								Surgery	Treatment	Mean	Std. Error	df	95% Confidence Interval
																														Lower Bound	Upper Bound
	Estimates																								Endo	7daysTHC	7.98067	0.247352	105.616	7.49025	8.47109
	Measure:Mechanicalsensitiviy																									AcuteTHC	7.32556	0.260732	105.616	6.80861	7.8425
	Surgery	Time	Mean	Std. Error	95% Confidence Interval																					Vehicle	10.4225	0.225801	105.616	9.97481	10.8702
					Lower Bound	Upper Bound																			Sham	7daysTHC	.a	.	.	.	.
	Sham	1	6.22882	0.332814	5.5647	6.89294																				AcuteTHC	.a	.	.	.	.
		2	8.59545	0.528443	7.54096	9.64994																				Vehicle	6.61167	0.225801	105.616	6.16398	7.05936
		3	6.63183	0.451828	5.73023	7.53344																			a. This level combination of factors is not observed, thus the corresponding population marginal mean is not estimable. b. Dependent Variable: AUC.
		4	5.92488	0.455782	5.01538	6.83438
		5	5.37025	0.429171	4.51385	6.22664																			Pairwise Comparisonsd
	Endo	1	5.97409	0.322621	5.33031	6.61787																			Surgery	(I) Treatment	(J) Treatment	Mean Difference (I-J)	Std. Error	df	Sig.a	95% Confidence Interval for Differencea
		2	10.3761	0.512258	9.35392	11.3983																										Lower Bound	Upper Bound
		3	9.65872	0.437989	8.78473	10.5327																			Endo	7daysTHC	AcuteTHC	0.655111	0.359395	105.616	0.21348	-0.219192	1.52941
		4	8.61159	0.441823	7.72994	9.49323																					Vehicle	-2.442*	0.334917	105.616	1.76455e-10	-3.25659	-1.62708
		5	8.51442	0.416026	7.68425	9.34458																				AcuteTHC	7daysTHC	-0.655111	0.359395	105.616	0.21348	-1.52941	0.219192
																											Vehicle	-3.097*	0.344917	105.616	3.42389e-14	-3.93603	-2.25786
	Pairwise Comparisons																									Vehicle	7daysTHC	2.442*	0.334917	105.616	1.76455e-10	1.62708	3.25659
	Measure:Mechanicalsensitiviy																										AcuteTHC	3.097*	0.344917	105.616	3.42389e-14	2.25786	3.93603
	Surgery	(I) Time	(J) Time	Mean Difference (I-J)	Std. Error	Sig.a	95% Confidence Interval for Differencea																		Sham	7daysTHC	AcuteTHC	.b,c	.	.	.	.	.
							Lower Bound	Upper Bound																			Vehicle	.b	.	.	.	.	.
	Sham	1	2	-2.367*	0.470615	3.83072e-05	-3.73212	-1.00113																		AcuteTHC	7daysTHC	.b,c	.	.	.	.	.
			3	-0.40301	0.439712	1	-1.67884	0.872819																			Vehicle	.b	.	.	.	.	.
			4	0.303947	0.470689	1	-1.06176	1.66966																		Vehicle	7daysTHC	.c	.	.	.	.	.
			5	0.858577	0.521876	1	-0.655655	2.37281																			AcuteTHC	.c	.	.	.	.	.
		2	1	2.367*	0.470615	3.83072e-05	1.00113	3.73212																	Based on estimated marginal means
			3	1.964*	0.403086	6.93625e-05	0.79406	3.13318																	a. Adjustment for multiple comparisons: Bonferroni. *. The mean difference is significant at the .05 level. b. The level combination of factors in (I) is not observed. c. The level combination of factors in (J) is not observed. d. Dependent Variable: AUC.
			4	2.671*	0.401041	5.80138e-08	1.50695	3.8342
			5	3.225*	0.518183	3.43709e-07	1.72169	4.72872																	Univariate Testsa
		3	1	0.40301	0.439712	1	-0.872819	1.67884																	Surgery	Numerator df	Denominator df	F	Sig.
			2	-1.964*	0.403086	6.93625e-05	-3.13318	-0.79406																	Endo	2	105.616	47.1868	2.27772e-15
			4	0.706957	0.365126	0.570009	-0.352462	1.76638																	Sham	0	.	.	.
			5	1.26159	0.487067	0.117262	-0.151644	2.67482																	Each F tests the simple effects of Treatment within each level combination of the other effects shown. These tests are based on the estimable linearly independent pairwise comparisons among the estimated marginal means.
		4	1	-0.303947	0.470689	1	-1.66966	1.06176																	a. Dependent Variable: AUC.
			2	-2.671*	0.401041	5.80138e-08	-3.8342	-1.50695
			3	-0.706957	0.365126	0.570009	-1.76638	0.352462
			5	0.55463	0.426491	1	-0.682841	1.7921																	7. Surgery * Day
		5	1	-0.858577	0.521876	1	-2.37281	0.655655
			2	-3.225*	0.518183	3.43709e-07	-4.72872	-1.72169																	Estimatesb
			3	-1.26159	0.487067	0.117262	-2.67482	0.151644																	Surgery	Day	Mean	Std. Error	df	95% Confidence Interval
			4	-0.55463	0.426491	1	-1.7921	0.682841																						Lower Bound	Upper Bound
	Endo	1	2	-4.402*	0.456201	2.30103e-13	-5.72571	-3.07836																	Endo	Day -2	5.52498	0.189927	39	5.14082	5.90914
			3	-3.685*	0.426244	1.48361e-11	-4.92139	-2.44788																		Day 7	11.8212	0.290447	39	11.2337	12.4087
			4	-2.637*	0.456273	2.04747e-06	-3.96138	-1.31362																		Day 14	8.38252	0.244375	39	7.88822	8.87681
			5	-2.540*	0.505893	3.93866e-05	-4.00818	-1.07247																	Sham	Day -2	5.588a	0.30312	39	4.97521	6.20145
		2	1	4.402*	0.456201	2.30103e-13	3.07836	5.72571																		Day 7	7.873a	0.463549	39	6.93572	8.81095
			3	0.717398	0.39074	0.707301	-0.41634	1.85114																		Day 14	6.373a	0.390019	39	5.58445	7.16222
			4	1.765*	0.388758	0.000236925	0.636546	2.89252																	a. Based on modified population marginal mean. b. Dependent Variable: AUC.
			5	1.862*	0.502312	0.00424484	0.404238	3.31917
		3	1	3.685*	0.426244	1.48361e-11	2.44788	4.92139																	Pairwise Comparisonsd
			2	-0.717398	0.39074	0.707301	-1.85114	0.41634																	Day	(I) Surgery	(J) Surgery	Mean Difference (I-J)	Std. Error	df	Sig.b	95% Confidence Interval for Differenceb
			4	1.047*	0.353943	0.0425017	0.0201633	2.07411																								Lower Bound	Upper Bound
			5	1.14431	0.472149	0.180331	-0.225641	2.51425																	Day -2	Endo	Sham	-.063a	0.357707	39	0.860342	-0.786882	0.660178
		4	1	2.637*	0.456273	2.04747e-06	1.31362	3.96138																		Sham	Endo	.063c	0.357707	39	0.860342	-0.660178	0.786882
			2	-1.765*	0.388758	0.000236925	-2.89252	-0.636546																	Day 7	Endo	Sham	3.948a,*	0.547026	39	1.08119e-08	2.84143	5.05435
			3	-1.047*	0.353943	0.0425017	-2.07411	-0.0201633																		Sham	Endo	-3.948c,*	0.547026	39	1.08119e-08	-5.05435	-2.84143
			5	0.0971711	0.413429	1	-1.1024	1.29674																	Day 14	Endo	Sham	2.009a,*	0.460254	39	9.04956e-05	1.07823	2.94014
		5	1	2.540*	0.505893	3.93866e-05	1.07247	4.00818																		Sham	Endo	-2.009c,*	0.460254	39	9.04956e-05	-2.94014	-1.07823
			2	-1.862*	0.502312	0.00424484	-3.31917	-0.404238																	Based on estimated marginal means
			3	-1.14431	0.472149	0.180331	-2.51425	0.225641																	a. An estimate of the modified population marginal mean (J). b. Adjustment for multiple comparisons: Bonferroni. c. An estimate of the modified population marginal mean (I). *. The mean difference is significant at the .05 level. d. Dependent Variable: AUC.
			4	-0.0971711	0.413429	1	-1.29674	1.1024
	Based on estimated marginal means																								Univariate Testsa
	*. The mean difference is significant at the .05 level. a. Adjustment for multiple comparisons: Bonferroni.																								Day	Numerator df	Denominator df	F	Sig.
																									Day -2	1	39	0.0313664	0.860342
	Multivariate Tests																								Day 7	1	39	52.0852	1.08119e-08
	Surgery		Value	F	Hypothesis df	Error df	Sig.	Partial Eta Squared	Noncent. Parameter	Observed Powerb															Day 14	1	39	19.0565	9.04956e-05
	Sham	Pillai's trace	0.448535	13.217a	4	65	6.1919e-08	0.448535	52.8679	0.999989															Each F tests the simple effects of Surgery within each level combination of the other effects shown. These tests are based on the linearly independent pairwise comparisons among the estimated marginal means.
		Wilks' lambda	0.551465	13.217a	4	65	6.1919e-08	0.448535	52.8679	0.999989															a. Dependent Variable: AUC.
		Hotelling's trace	0.813352	13.217a	4	65	6.1919e-08	0.448535	52.8679	0.999989
		Roy's largest root	0.813352	13.217a	4	65	6.1919e-08	0.448535	52.8679	0.999989
	Endo	Pillai's trace	0.621386	26.670a	4	65	4.14584e-13	0.621386	106.679	1															8. Surgery * Day
		Wilks' lambda	0.378614	26.670a	4	65	4.14584e-13	0.621386	106.679	1
		Hotelling's trace	1.64122	26.670a	4	65	4.14584e-13	0.621386	106.679	1															Estimatesb
		Roy's largest root	1.64122	26.670a	4	65	4.14584e-13	0.621386	106.679	1															Surgery	Day	Mean	Std. Error	df	95% Confidence Interval
	Each F tests the multivariate simple effects of Time within each level combination of the other effects shown. These tests are based on the linearly independent pairwise comparisons among the estimated marginal means.																													Lower Bound	Upper Bound
	a. Exact statistic b. Computed using alpha = .05																								Endo	Day -2	5.52498	0.189927	39	5.14082	5.90914
																										Day 7	11.8212	0.290447	39	11.2337	12.4087
																										Day 14	8.38252	0.244375	39	7.88822	8.87681
	9. Treatment * Time																								Sham	Day -2	5.588a	0.30312	39	4.97521	6.20145
																										Day 7	7.873a	0.463549	39	6.93572	8.81095
	Estimates																									Day 14	6.373a	0.390019	39	5.58445	7.16222
	Measure:Mechanicalsensitiviy																								a. Based on modified population marginal mean. b. Dependent Variable: AUC.
	Treatment	Time	Mean	Std. Error	95% Confidence Interval
					Lower Bound	Upper Bound																			Pairwise Comparisonsd
	Vehicle	1	5.88855	0.318231	5.25353	6.52357																			Surgery	(I) Day	(J) Day	Mean Difference (I-J)	Std. Error	df	Sig.a	95% Confidence Interval for Differencea
		2	10.3583	0.505288	9.35	11.3666																										Lower Bound	Upper Bound
		3	9.49908	0.43203	8.63698	10.3612																			Endo	Day -2	Day 7	-6.296*	0.347032	67.1972	4.04356e-27	-7.14834	-5.44414
		4	8.66961	0.435811	7.79996	9.53925																					Day 14	-2.858*	0.309502	73.5197	1.92379e-13	-3.61581	-2.09926
		5	8.34171	0.410366	7.52284	9.16058																				Day 7	Day -2	6.296*	0.347032	67.1972	4.04356e-27	5.44414	7.14834
	THC	1	6.31436	0.337014	5.64186	6.98686																					Day 14	3.439*	0.379577	75.7835	3.15806e-13	2.50939	4.36801
		2	8.61328	0.535111	7.54548	9.68108																				Day 14	Day -2	2.858*	0.309502	73.5197	1.92379e-13	2.09926	3.61581
		3	6.79148	0.457529	5.87849	7.70446																					Day 7	-3.439*	0.379577	75.7835	3.15806e-13	-4.36801	-2.50939
		4	5.86686	0.461534	4.94588	6.78783																			Sham	Day -2	Day 7	-2.285*,b,c	0.553859	67.1972	0.000312263	-3.64494	-0.925062
		5	5.54295	0.434587	4.67575	6.41016																					Day 14	-.785b,c	0.49396	73.5197	0.348922	-1.9952	0.425198
																										Day 7	Day -2	2.285*,b,c	0.553859	67.1972	0.000312263	0.925062	3.64494
	Pairwise Comparisons																										Day 14	1.500*,b,c	0.605799	75.7835	0.0465452	0.0168335	2.98317
	Measure:Mechanicalsensitiviy																									Day 14	Day -2	.785b,c	0.49396	73.5197	0.348922	-0.425198	1.9952
	Time	(I) Treatment	(J) Treatment	Mean Difference (I-J)	Std. Error	Sig.a	95% Confidence Interval for Differencea																				Day 7	-1.500*,b,c	0.605799	75.7835	0.0465452	-2.98317	-0.0168335
							Lower Bound	Upper Bound																	Based on estimated marginal means
	1	Vehicle	THC	-0.425805	0.463519	0.361533	-1.35074	0.499132																	*. The mean difference is significant at the .05 level. a. Adjustment for multiple comparisons: Bonferroni. b. An estimate of the modified population marginal mean (I). c. An estimate of the modified population marginal mean (J). d. Dependent Variable: AUC.
		THC	Vehicle	0.425805	0.463519	0.361533	-0.499132	1.35074
	2	Vehicle	THC	1.745*	0.735975	0.0205791	0.276392	3.21362																	Univariate Testsa
		THC	Vehicle	-1.745*	0.735975	0.0205791	-3.21362	-0.276392																	Surgery	Numerator df	Denominator df	F	Sig.
	3	Vehicle	THC	2.708*	0.629272	5.53183e-05	1.45191	3.9633																	Endo	2	88.5092	170.14	4.72351e-31
		THC	Vehicle	-2.708*	0.629272	5.53183e-05	-3.9633	-1.45191																	Sham	2	88.5092	8.53366	0.000408348
	4	Vehicle	THC	2.803*	0.634779	3.70257e-05	1.53607	4.06943																	Each F tests the simple effects of Day within each level combination of the other effects shown. These tests are based on the linearly independent pairwise comparisons among the estimated marginal means.
		THC	Vehicle	-2.803*	0.634779	3.70257e-05	-4.06943	-1.53607																	a. Dependent Variable: AUC.
	5	Vehicle	THC	2.799*	0.597717	1.40092e-05	1.60603	3.99148
		THC	Vehicle	-2.799*	0.597717	1.40092e-05	-3.99148	-1.60603
	Based on estimated marginal means																								9. Treatment * Day
	a. Adjustment for multiple comparisons: Bonferroni. *. The mean difference is significant at the .05 level.
																									Estimatesb
	Univariate Tests																								Treatment	Day	Mean	Std. Error	df	95% Confidence Interval
	Measure:Mechanicalsensitiviy																													Lower Bound	Upper Bound
	Time		Sum of Squares	df	Mean Square	F	Sig.	Partial Eta Squared	Noncent. Parameter	Observed Powera															7daysTHC	Day -2	5.688a	0.332052	39	5.01636	6.35964
	1	Contrast	3.24755	1	3.24755	0.843892	0.361533	0.0122581	0.843892	0.147964																Day 7	12.052a	0.507792	39	11.0249	13.0791
		Error	261.685	68	3.8483																					Day 14	6.202a	0.427245	39	5.33782	7.06618
	2	Contrast	54.5418	1	54.5418	5.62171	0.0205791	0.0763594	5.62171	0.647094															AcuteTHC	Day -2	5.411a	0.350013	39	4.70314	6.11908
		Error	659.736	68	9.702																					Day 7	10.897a	0.53526	39	9.814	11.9793
	3	Contrast	131.312	1	131.312	18.5137	5.53183e-05	0.213997	18.5137	0.988734																Day 14	5.669a	0.450355	39	4.75796	6.57982
		Error	482.303	68	7.0927																				Vehicle	Day -2	5.53208	0.214338	39	5.09854	5.96562
	4	Contrast	140.703	1	140.703	19.495	3.70257e-05	0.222812	19.495	0.991626																Day 7	10.1942	0.327779	39	9.53117	10.8572
		Error	490.783	68	7.2174																					Day 14	9.825	0.275785	39	9.26717	10.3828
	5	Contrast	140.303	1	140.303	21.925	1.40092e-05	0.243814	21.925	0.996039															a. Based on modified population marginal mean. b. Dependent Variable: AUC.
		Error	435.146	68	6.39921
	Each F tests the simple effects of Treatment within each level combination of the other effects shown. These tests are based on the linearly independent pairwise comparisons among the estimated marginal means.																								Pairwise Comparisonsd
	a. Computed using alpha = .05																								Day	(I) Treatment	(J) Treatment	Mean Difference (I-J)	Std. Error	df	Sig.c	95% Confidence Interval for Differencec
																																Lower Bound	Upper Bound
																									Day -2	7daysTHC	AcuteTHC	.277a,b	0.48246	39	1	-0.93006	1.48384
	10. Treatment * Time																										Vehicle	.156a	0.39522	39	1	-0.83279	1.14462
																										AcuteTHC	7daysTHC	-.277a,b	0.48246	39	1	-1.48384	0.93006
	Estimates																										Vehicle	-.121a	0.410427	39	1	-1.14772	0.905775
	Measure:Mechanicalsensitiviy																									Vehicle	7daysTHC	-.156b	0.39522	39	1	-1.14462	0.83279
	Treatment	Time	Mean	Std. Error	95% Confidence Interval																						AcuteTHC	.121b	0.410427	39	1	-0.905775	1.14772
					Lower Bound	Upper Bound																			Day 7	7daysTHC	AcuteTHC	1.155a,b	0.737805	39	0.376349	-0.690403	3.00107
	Vehicle	1	5.88855	0.318231	5.25353	6.52357																					Vehicle	1.858a,*	0.604394	39	0.0115387	0.345847	3.36982
		2	10.3583	0.505288	9.35	11.3666																				AcuteTHC	7daysTHC	-1.155a,b	0.737805	39	0.376349	-3.00107	0.690403
		3	9.49908	0.43203	8.63698	10.3612																					Vehicle	.703a	0.627648	39	0.80963	-0.867661	2.27266
		4	8.66961	0.435811	7.79996	9.53925																				Vehicle	7daysTHC	-1.858b,*	0.604394	39	0.0115387	-3.36982	-0.345847
		5	8.34171	0.410366	7.52284	9.16058																					AcuteTHC	-.703b	0.627648	39	0.80963	-2.27266	0.867661
	THC	1	6.31436	0.337014	5.64186	6.98686																			Day 14	7daysTHC	AcuteTHC	.533a,b	0.620772	39	1	-1.01985	2.08607
		2	8.61328	0.535111	7.54548	9.68108																					Vehicle	-3.623a,*	0.508523	39	4.33939e-08	-4.89515	-2.35085
		3	6.79148	0.457529	5.87849	7.70446																				AcuteTHC	7daysTHC	-.533a,b	0.620772	39	1	-2.08607	1.01985
		4	5.86686	0.461534	4.94588	6.78783																					Vehicle	-4.156a,*	0.528088	39	4.2364e-09	-5.47721	-2.83501
		5	5.54295	0.434587	4.67575	6.41016																				Vehicle	7daysTHC	3.623b,*	0.508523	39	4.33939e-08	2.35085	4.89515
																											AcuteTHC	4.156b,*	0.528088	39	4.2364e-09	2.83501	5.47721
	Pairwise Comparisons																								Based on estimated marginal means
	Measure:Mechanicalsensitiviy																								a. An estimate of the modified population marginal mean (I). b. An estimate of the modified population marginal mean (J). c. Adjustment for multiple comparisons: Bonferroni. *. The mean difference is significant at the .05 level. d. Dependent Variable: AUC.
	Treatment	(I) Time	(J) Time	Mean Difference (I-J)	Std. Error	Sig.a	95% Confidence Interval for Differencea
							Lower Bound	Upper Bound																	Univariate Testsa
	Vehicle	1	2	-4.470*	0.449994	7.18793e-14	-5.7754	-3.16407																	Day	Numerator df	Denominator df	F	Sig.
			3	-3.611*	0.420445	1.88205e-11	-4.83045	-2.3906																	Day -2	2	39	0.167635	0.846269
			4	-2.781*	0.450064	4.12278e-07	-4.08692	-1.47518																	Day 7	2	39	4.75798	0.0141583
			5	-2.453*	0.499009	5.86662e-05	-3.90104	-1.00528																	Day 14	2	39	43.9977	1.00437e-10
		2	1	4.470*	0.449994	7.18793e-14	3.16407	5.7754																	Each F tests the simple effects of Treatment within each level combination of the other effects shown. These tests are based on the linearly independent pairwise comparisons among the estimated marginal means.
			3	0.859211	0.385424	0.291035	-0.259101	1.97752																	a. Dependent Variable: AUC.
			4	1.689*	0.383468	0.000385986	0.576045	2.80132
			5	2.017*	0.495478	0.00124851	0.578944	3.45421
		3	1	3.611*	0.420445	1.88205e-11	2.3906	4.83045																	10. Treatment * Day
			2	-0.859211	0.385424	0.291035	-1.97752	0.259101
			4	0.829474	0.349127	0.203325	-0.183524	1.84247																	Estimatesb
			5	1.15737	0.465725	0.154172	-0.193939	2.50868																	Treatment	Day	Mean	Std. Error	df	95% Confidence Interval
		4	1	2.781*	0.450064	4.12278e-07	1.47518	4.08692																						Lower Bound	Upper Bound
			2	-1.689*	0.383468	0.000385986	-2.80132	-0.576045																	7daysTHC	Day -2	5.688a	0.332052	39	5.01636	6.35964
			3	-0.829474	0.349127	0.203325	-1.84247	0.183524																		Day 7	12.052a	0.507792	39	11.0249	13.0791
			5	0.327895	0.407804	1	-0.855354	1.51114																		Day 14	6.202a	0.427245	39	5.33782	7.06618
		5	1	2.453*	0.499009	5.86662e-05	1.00528	3.90104																	AcuteTHC	Day -2	5.411a	0.350013	39	4.70314	6.11908
			2	-2.017*	0.495478	0.00124851	-3.45421	-0.578944																		Day 7	10.897a	0.53526	39	9.814	11.9793
			3	-1.15737	0.465725	0.154172	-2.50868	0.193939																		Day 14	5.669a	0.450355	39	4.75796	6.57982
			4	-0.327895	0.407804	1	-1.51114	0.855354																	Vehicle	Day -2	5.53208	0.214338	39	5.09854	5.96562
	THC	1	2	-2.299*	0.476554	8.28247e-05	-3.68165	-0.916197																		Day 7	10.1942	0.327779	39	9.53117	10.8572
			3	-0.477118	0.44526	1	-1.76905	0.81481																		Day 14	9.825	0.275785	39	9.26717	10.3828
			4	0.4475	0.476628	1	-0.935443	1.83044																	a. Based on modified population marginal mean. b. Dependent Variable: AUC.
			5	0.771406	0.528462	1	-0.761933	2.30475
		2	1	2.299*	0.476554	8.28247e-05	0.916197	3.68165																	Pairwise Comparisonsd
			3	1.822*	0.408172	0.000311505	0.637489	3.00612																	Treatment	(I) Day	(J) Day	Mean Difference (I-J)	Std. Error	df	Sig.c	95% Confidence Interval for Differencec
			4	2.746*	0.406102	3.78254e-08	1.56811	3.92473																								Lower Bound	Upper Bound
			5	3.070*	0.524722	1.54351e-06	1.54784	4.59282																	7daysTHC	Day -2	Day 7	-6.364*,a,b	0.606722	67.1972	2.58895e-15	-7.85374	-4.87426
		3	1	0.477118	0.44526	1	-0.81481	1.76905																			Day 14	-.514a,b	0.541106	73.5197	1	-1.83971	0.811705
			2	-1.822*	0.408172	0.000311505	-3.00612	-0.637489																		Day 7	Day -2	6.364*,a,b	0.606722	67.1972	2.58895e-15	4.87426	7.85374
			4	0.924618	0.369734	0.148073	-0.148169	1.99741																			Day 14	5.850*,a,b	0.66362	75.7835	9.24756e-13	4.22527	7.47473
			5	1.24852	0.493213	0.136775	-0.18254	2.67959																		Day 14	Day -2	.514a,b	0.541106	73.5197	1	-0.811705	1.83971
		4	1	-0.4475	0.476628	1	-1.83044	0.935443																			Day 7	-5.850*,a,b	0.66362	75.7835	9.24756e-13	-7.47473	-4.22527
			2	-2.746*	0.406102	3.78254e-08	-3.92473	-1.56811																	AcuteTHC	Day -2	Day 7	-5.486*,a,b	0.639541	67.1972	6.43936e-12	-7.05588	-3.91523
			3	-0.924618	0.369734	0.148073	-1.99741	0.148169																			Day 14	-.258a,b	0.570376	73.5197	1	-1.65519	1.13964
			5	0.323906	0.431873	1	-0.92918	1.57699																		Day 7	Day -2	5.486*,a,b	0.639541	67.1972	6.43936e-12	3.91523	7.05588
		5	1	-0.771406	0.528462	1	-2.30475	0.761933																			Day 14	5.228*,a,b	0.699517	75.7835	3.39123e-10	3.51516	6.94039
			2	-3.070*	0.524722	1.54351e-06	-4.59282	-1.54784																		Day 14	Day -2	.258a,b	0.570376	73.5197	1	-1.13964	1.65519
			3	-1.24852	0.493213	0.136775	-2.67959	0.18254																			Day 7	-5.228*,a,b	0.699517	75.7835	3.39123e-10	-6.94039	-3.51516
			4	-0.323906	0.431873	1	-1.57699	0.92918																	Vehicle	Day -2	Day 7	-4.662*	0.391637	67.1972	9.87562e-18	-5.6237	-3.70046
	Based on estimated marginal means																										Day 14	-4.293*	0.349283	73.5197	5.01644e-19	-5.14866	-3.43718
	*. The mean difference is significant at the .05 level. a. Adjustment for multiple comparisons: Bonferroni.																									Day 7	Day -2	4.662*	0.391637	67.1972	9.87562e-18	3.70046	5.6237
																											Day 14	0.369167	0.428365	75.7835	1	-0.67959	1.41792
	Multivariate Tests																									Day 14	Day -2	4.293*	0.349283	73.5197	5.01644e-19	3.43718	5.14866
	Treatment		Value	F	Hypothesis df	Error df	Sig.	Partial Eta Squared	Noncent. Parameter	Observed Powerb																	Day 7	-0.369167	0.428365	75.7835	1	-1.41792	0.67959
	Vehicle	Pillai's trace	0.623754	26.940a	4	65	3.39342e-13	0.623754	107.759	1															Based on estimated marginal means
		Wilks' lambda	0.376246	26.940a	4	65	3.39342e-13	0.623754	107.759	1															*. The mean difference is significant at the .05 level. a. An estimate of the modified population marginal mean (I). b. An estimate of the modified population marginal mean (J). c. Adjustment for multiple comparisons: Bonferroni. d. Dependent Variable: AUC.
		Hotelling's trace	1.65784	26.940a	4	65	3.39342e-13	0.623754	107.759	1
		Roy's largest root	1.65784	26.940a	4	65	3.39342e-13	0.623754	107.759	1															Univariate Testsa
	THC	Pillai's trace	0.440621	12.800a	4	65	9.67634e-08	0.440621	51.2003	0.999982															Treatment	Numerator df	Denominator df	F	Sig.
		Wilks' lambda	0.559379	12.800a	4	65	9.67634e-08	0.440621	51.2003	0.999982															7daysTHC	2	88.5092	58.7417	5.81597e-17
		Hotelling's trace	0.787697	12.800a	4	65	9.67634e-08	0.440621	51.2003	0.999982															AcuteTHC	2	88.5092	40.1096	3.97994e-13
		Roy's largest root	0.787697	12.800a	4	65	9.67634e-08	0.440621	51.2003	0.999982															Vehicle	2	88.5092	109.61	1.12284e-24
	Each F tests the multivariate simple effects of Time within each level combination of the other effects shown. These tests are based on the linearly independent pairwise comparisons among the estimated marginal means.																								Each F tests the simple effects of Day within each level combination of the other effects shown. These tests are based on the linearly independent pairwise comparisons among the estimated marginal means.
	a. Exact statistic b. Computed using alpha = .05																								a. Dependent Variable: AUC.
	11. Surgery * Treatment * Time																								11. Surgery * Treatment * Day
	Estimates																								Estimatesb
	Measure:Mechanicalsensitiviy																								Surgery	Treatment	Day	Mean	Std. Error	df	95% Confidence Interval
	Surgery	Treatment	Time	Mean	Std. Error	95% Confidence Interval																									Lower Bound	Upper Bound
						Lower Bound	Upper Bound																		Endo	7daysTHC	Day -2	5.688	0.332052	39	5.01636	6.35964
	Sham	Vehicle	1	5.84421	0.450047	4.94616	6.74227																				Day 7	12.052	0.507792	39	11.0249	13.0791
			2	8.83684	0.714585	7.41091	10.2628																				Day 14	6.202	0.427245	39	5.33782	7.06618
			3	7.40711	0.610983	6.18791	8.6263																			AcuteTHC	Day -2	5.41111	0.350013	39	4.70314	6.11908
			4	6.41132	0.61633	5.18145	7.64118																				Day 7	10.8967	0.53526	39	9.814	11.9793
			5	5.33237	0.580345	4.17431	6.49043																				Day 14	5.66889	0.450355	39	4.75796	6.57982
		THC	1	6.61344	0.490427	5.6348	7.59207																			Vehicle	Day -2	5.47583	0.30312	39	4.86271	6.08895
			2	8.35406	0.778701	6.80019	9.90794																				Day 7	12.515	0.463549	39	11.5774	13.4526
			3	5.85656	0.665803	4.52797	7.18515																				Day 14	13.2767	0.390019	39	12.4878	14.0656
			4	5.43844	0.67163	4.09822	6.77865																		Sham	7daysTHC	Day -2	.a	.	.	.	.
			5	5.40812	0.632416	4.14616	6.67009																				Day 7	.a	.	.	.	.
	Endo	Vehicle	1	5.93289	0.450047	5.03484	6.83095																				Day 14	.a	.	.	.	.
			2	11.8797	0.714585	10.4538	13.3057																			AcuteTHC	Day -2	.a	.	.	.	.
			3	11.5911	0.610983	10.3719	12.8102																				Day 7	.a	.	.	.	.
			4	10.9279	0.61633	9.69803	12.1578																				Day 14	.a	.	.	.	.
			5	11.3511	0.580345	10.193	12.5091																			Vehicle	Day -2	5.58833	0.30312	39	4.97521	6.20145
		THC	1	6.01528	0.462379	5.09261	6.93794																				Day 7	7.87333	0.463549	39	6.93572	8.81095
			2	8.8725	0.734166	7.40749	10.3375																				Day 14	6.37333	0.390019	39	5.58445	7.16222
			3	7.72639	0.627725	6.47378	8.97899																		a. This level combination of factors is not observed, thus the corresponding population marginal mean is not estimable. b. Dependent Variable: AUC.
			4	6.29528	0.633219	5.03171	7.55885
			5	5.67778	0.596248	4.48798	6.86757																		Pairwise Comparisonsd
																									Treatment	Day	(I) Surgery	(J) Surgery	Mean Difference (I-J)	Std. Error	df	Sig.b	95% Confidence Interval for Differenceb
	Pairwise Comparisons																																Lower Bound	Upper Bound
	Measure:Mechanicalsensitiviy																								7daysTHC	Day -2	Endo	Sham	.a	.	.	.	.	.
	Surgery	Treatment	(I) Time	(J) Time	Mean Difference (I-J)	Std. Error	Sig.a	95% Confidence Interval for Differencea																			Sham	Endo	.c	.	.	.	.	.
								Lower Bound	Upper Bound																	Day 7	Endo	Sham	.a	.	.	.	.	.
	Sham	Vehicle	1	2	-2.993*	0.636388	0.00013007	-4.83912	-1.14614																		Sham	Endo	.c	.	.	.	.	.
				3	-1.56289	0.594598	0.105936	-3.28813	0.162341																	Day 14	Endo	Sham	.a	.	.	.	.	.
				4	-0.567105	0.636487	1	-2.41388	1.27967																		Sham	Endo	.c	.	.	.	.	.
				5	0.511842	0.705706	1	-1.53577	2.55946																AcuteTHC	Day -2	Endo	Sham	.a	.	.	.	.	.
			2	1	2.993*	0.636388	0.00013007	1.14614	4.83912																		Sham	Endo	.c	.	.	.	.	.
				3	1.42974	0.545071	0.107487	-0.151795	3.01127																	Day 7	Endo	Sham	.a	.	.	.	.	.
				4	2.426*	0.542306	0.000301239	0.852017	3.99904																		Sham	Endo	.c	.	.	.	.	.
				5	3.504*	0.700711	4.25173e-05	1.47135	5.5376																	Day 14	Endo	Sham	.a	.	.	.	.	.
			3	1	1.56289	0.594598	0.105936	-0.162341	3.28813																		Sham	Endo	.c	.	.	.	.	.
				2	-1.42974	0.545071	0.107487	-3.01127	0.151795																Vehicle	Day -2	Endo	Sham	-0.1125	0.428677	39	0.794367	-0.97958	0.75458
				4	0.995789	0.493741	0.476645	-0.436806	2.42839																		Sham	Endo	0.1125	0.428677	39	0.794367	-0.75458	0.97958
				5	2.075*	0.658635	0.0242635	0.1637	3.98577																	Day 7	Endo	Sham	4.642*	0.655557	39	1.6621e-08	3.31568	5.96766
			4	1	0.567105	0.636487	1	-1.27967	2.41388																		Sham	Endo	-4.642*	0.655557	39	1.6621e-08	-5.96766	-3.31568
				2	-2.426*	0.542306	0.000301239	-3.99904	-0.852017																	Day 14	Endo	Sham	6.903*	0.55157	39	3.10048e-15	5.78768	8.01899
				3	-0.995789	0.493741	0.476645	-2.42839	0.436806																		Sham	Endo	-6.903*	0.55157	39	3.10048e-15	-8.01899	-5.78768
				5	1.07895	0.576722	0.656723	-0.594418	2.75231																Based on estimated marginal means
			5	1	-0.511842	0.705706	1	-2.55946	1.53577																a. The level combination of factors in (J) is not observed. b. Adjustment for multiple comparisons: Bonferroni. c. The level combination of factors in (I) is not observed. *. The mean difference is significant at the .05 level. d. Dependent Variable: AUC.
				2	-3.504*	0.700711	4.25173e-05	-5.5376	-1.47135
				3	-2.075*	0.658635	0.0242635	-3.98577	-0.1637																Univariate Testsa
				4	-1.07895	0.576722	0.656723	-2.75231	0.594418																Treatment	Day	Numerator df	Denominator df	F	Sig.
		THC	1	2	-1.74063	0.693487	0.144599	-3.75279	0.271538																7daysTHC	Day -2	0	.	.	.
				3	0.756875	0.647949	1	-1.12316	2.63691																	Day 7	0	.	.	.
				4	1.175	0.693596	0.94828	-0.837478	3.18748																	Day 14	0	.	.	.
				5	1.20531	0.769025	1	-1.02602	3.43665																AcuteTHC	Day -2	0	.	.	.
			2	1	1.74063	0.693487	0.144599	-0.271538	3.75279																	Day 7	0	.	.	.
				3	2.498*	0.593978	0.000781582	0.774066	4.22093																	Day 14	0	.	.	.
				4	2.916*	0.590965	5.49006e-05	1.20093	4.63032																Vehicle	Day -2	1	39	0.0688724	0.794367
				5	2.946*	0.763582	0.00256636	0.730393	5.16148																	Day 7	1	39	50.1333	1.6621e-08
			3	1	-0.756875	0.647949	1	-2.63691	1.12316																	Day 14	1	39	156.645	3.10048e-15
				2	-2.498*	0.593978	0.000781582	-4.22093	-0.774066																Each F tests the simple effects of Surgery within each level combination of the other effects shown. These tests are based on the estimable linearly independent pairwise comparisons among the estimated marginal means.
				4	0.418125	0.538042	1	-1.14301	1.97926																a. Dependent Variable: AUC.
				5	0.448438	0.71773	1	-1.63407	2.53094
			4	1	-1.175	0.693596	0.94828	-3.18748	0.837478
				2	-2.916*	0.590965	5.49006e-05	-4.63032	-1.20093																12. Surgery * Treatment * Day
				3	-0.418125	0.538042	1	-1.97926	1.14301
				5	0.0303125	0.628468	1	-1.7932	1.85382																Estimatesb
			5	1	-1.20531	0.769025	1	-3.43665	1.02602																Surgery	Treatment	Day	Mean	Std. Error	df	95% Confidence Interval
				2	-2.946*	0.763582	0.00256636	-5.16148	-0.730393																						Lower Bound	Upper Bound
				3	-0.448438	0.71773	1	-2.53094	1.63407																Endo	7daysTHC	Day -2	5.688	0.332052	39	5.01636	6.35964
				4	-0.0303125	0.628468	1	-1.85382	1.7932																		Day 7	12.052	0.507792	39	11.0249	13.0791
	Endo	Vehicle	1	2	-5.947*	0.636388	8.08556e-13	-7.79333	-4.10035																		Day 14	6.202	0.427245	39	5.33782	7.06618
				3	-5.658*	0.594598	3.9862e-13	-7.38339	-3.93292																	AcuteTHC	Day -2	5.41111	0.350013	39	4.70314	6.11908
				4	-4.995*	0.636487	4.14183e-10	-6.84178	-3.14822																		Day 7	10.8967	0.53526	39	9.814	11.9793
				5	-5.418*	0.705706	8.43354e-10	-7.46577	-3.37054																		Day 14	5.66889	0.450355	39	4.75796	6.57982
			2	1	5.947*	0.636388	8.08556e-13	4.10035	7.79333																	Vehicle	Day -2	5.47583	0.30312	39	4.86271	6.08895
				3	0.288684	0.545071	1	-1.29285	1.87022																		Day 7	12.515	0.463549	39	11.5774	13.4526
				4	0.951842	0.542306	0.837334	-0.621667	2.52535																		Day 14	13.2767	0.390019	39	12.4878	14.0656
				5	0.528684	0.700711	1	-1.50444	2.56181																Sham	7daysTHC	Day -2	.a	.	.	.	.
			3	1	5.658*	0.594598	3.9862e-13	3.93292	7.38339																		Day 7	.a	.	.	.	.
				2	-0.288684	0.545071	1	-1.87022	1.29285																		Day 14	.a	.	.	.	.
				4	0.663158	0.493741	1	-0.769438	2.09575																	AcuteTHC	Day -2	.a	.	.	.	.
				5	0.24	0.658635	1	-1.67104	2.15104																		Day 7	.a	.	.	.	.
			4	1	4.995*	0.636487	4.14183e-10	3.14822	6.84178																		Day 14	.a	.	.	.	.
				2	-0.951842	0.542306	0.837334	-2.52535	0.621667																	Vehicle	Day -2	5.58833	0.30312	39	4.97521	6.20145
				3	-0.663158	0.493741	1	-2.09575	0.769438																		Day 7	7.87333	0.463549	39	6.93572	8.81095
				5	-0.423158	0.576722	1	-2.09652	1.25021																		Day 14	6.37333	0.390019	39	5.58445	7.16222
			5	1	5.418*	0.705706	8.43354e-10	3.37054	7.46577																a. This level combination of factors is not observed, thus the corresponding population marginal mean is not estimable. b. Dependent Variable: AUC.
				2	-0.528684	0.700711	1	-2.56181	1.50444
				3	-0.24	0.658635	1	-2.15104	1.67104																Pairwise Comparisonsd
				4	0.423158	0.576722	1	-1.25021	2.09652																Surgery	Day	(I) Treatment	(J) Treatment	Mean Difference (I-J)	Std. Error	df	Sig.a	95% Confidence Interval for Differencea
		THC	1	2	-2.857*	0.653826	0.000435464	-4.75431	-0.960136																								Lower Bound	Upper Bound
				3	-1.71111	0.610892	0.0662773	-3.48362	0.0614002																Endo	Day -2	7daysTHC	AcuteTHC	0.276889	0.48246	39	1	-0.93006	1.48384
				4	-0.28	0.653929	1	-2.17738	1.61738																			Vehicle	0.212167	0.4496	39	1	-0.912578	1.33691
				5	0.3375	0.725044	1	-1.76622	2.44122																		AcuteTHC	7daysTHC	-0.276889	0.48246	39	1	-1.48384	0.93006
			2	1	2.857*	0.653826	0.000435464	0.960136	4.75431																			Vehicle	-0.0647222	0.463024	39	1	-1.22305	1.0936
				3	1.14611	0.560007	0.445655	-0.478758	2.77098																		Vehicle	7daysTHC	-0.212167	0.4496	39	1	-1.33691	0.912578
				4	2.577*	0.557167	0.000172645	0.960595	4.19385																			AcuteTHC	0.0647222	0.463024	39	1	-1.0936	1.22305
				5	3.195*	0.719912	0.000341689	1.10589	5.28356																	Day 7	7daysTHC	AcuteTHC	1.15533	0.737805	39	0.376349	-0.690403	3.00107
			3	1	1.71111	0.610892	0.0662773	-0.0614002	3.48362																			Vehicle	-0.463	0.687554	39	1	-2.18303	1.25703
				2	-1.14611	0.560007	0.445655	-2.77098	0.478758																		AcuteTHC	7daysTHC	-1.15533	0.737805	39	0.376349	-3.00107	0.690403
				4	1.43111	0.50727	0.06266	-0.0407411	2.90296																			Vehicle	-1.61833	0.708083	39	0.0834024	-3.38971	0.153047
				5	2.049*	0.676683	0.034823	0.0852069	4.01202																		Vehicle	7daysTHC	0.463	0.687554	39	1	-1.25703	2.18303
			4	1	0.28	0.653929	1	-1.61738	2.17738																			AcuteTHC	1.61833	0.708083	39	0.0834024	-0.153047	3.38971
				2	-2.577*	0.557167	0.000172645	-4.19385	-0.960595																	Day 14	7daysTHC	AcuteTHC	0.533111	0.620772	39	1	-1.01985	2.08607
				3	-1.43111	0.50727	0.06266	-2.90296	0.0407411																			Vehicle	-7.075*	0.578492	39	1.9178e-14	-8.52186	-5.62748
				5	0.6175	0.592525	1	-1.10172	2.33672																		AcuteTHC	7daysTHC	-0.533111	0.620772	39	1	-2.08607	1.01985
			5	1	-0.3375	0.725044	1	-2.44122	1.76622																			Vehicle	-7.608*	0.595764	39	4.93623e-15	-9.09818	-6.11738
				2	-3.195*	0.719912	0.000341689	-5.28356	-1.10589																		Vehicle	7daysTHC	7.075*	0.578492	39	1.9178e-14	5.62748	8.52186
				3	-2.049*	0.676683	0.034823	-4.01202	-0.0852069																			AcuteTHC	7.608*	0.595764	39	4.93623e-15	6.11738	9.09818
				4	-0.6175	0.592525	1	-2.33672	1.10172																Sham	Day -2	7daysTHC	AcuteTHC	.b,c	.	.	.	.	.
	Based on estimated marginal means																											Vehicle	.b	.	.	.	.	.
	*. The mean difference is significant at the .05 level. a. Adjustment for multiple comparisons: Bonferroni.																										AcuteTHC	7daysTHC	.b,c	.	.	.	.	.
																												Vehicle	.b	.	.	.	.	.
	Multivariate Tests																										Vehicle	7daysTHC	.c	.	.	.	.	.
	Surgery	Treatment		Value	F	Hypothesis df	Error df	Sig.	Partial Eta Squared	Noncent. Parameter	Observed Powerb																	AcuteTHC	.c	.	.	.	.	.
	Sham	Vehicle	Pillai's trace	0.346695	8.624a	4	65	1.20232e-05	0.346695	34.4942	0.998347															Day 7	7daysTHC	AcuteTHC	.b,c	.	.	.	.	.
			Wilks' lambda	0.653305	8.624a	4	65	1.20232e-05	0.346695	34.4942	0.998347																	Vehicle	.b	.	.	.	.	.
			Hotelling's trace	0.530679	8.624a	4	65	1.20232e-05	0.346695	34.4942	0.998347																AcuteTHC	7daysTHC	.b,c	.	.	.	.	.
			Roy's largest root	0.530679	8.624a	4	65	1.20232e-05	0.346695	34.4942	0.998347																	Vehicle	.b	.	.	.	.	.
		THC	Pillai's trace	0.290264	6.646a	4	65	0.000151033	0.290264	26.5834	0.988521																Vehicle	7daysTHC	.c	.	.	.	.	.
			Wilks' lambda	0.709736	6.646a	4	65	0.000151033	0.290264	26.5834	0.988521																	AcuteTHC	.c	.	.	.	.	.
			Hotelling's trace	0.408976	6.646a	4	65	0.000151033	0.290264	26.5834	0.988521															Day 14	7daysTHC	AcuteTHC	.b,c	.	.	.	.	.
			Roy's largest root	0.408976	6.646a	4	65	0.000151033	0.290264	26.5834	0.988521																	Vehicle	.b	.	.	.	.	.
	Endo	Vehicle	Pillai's trace	0.633206	28.053a	4	65	1.50578e-13	0.633206	112.211	1																AcuteTHC	7daysTHC	.b,c	.	.	.	.	.
			Wilks' lambda	0.366794	28.053a	4	65	1.50578e-13	0.633206	112.211	1																	Vehicle	.b	.	.	.	.	.
			Hotelling's trace	1.72633	28.053a	4	65	1.50578e-13	0.633206	112.211	1																Vehicle	7daysTHC	.c	.	.	.	.	.
			Roy's largest root	1.72633	28.053a	4	65	1.50578e-13	0.633206	112.211	1																	AcuteTHC	.c	.	.	.	.	.
		THC	Pillai's trace	0.336701	8.249a	4	65	1.91719e-05	0.336701	32.995	0.997583														Based on estimated marginal means
			Wilks' lambda	0.663299	8.249a	4	65	1.91719e-05	0.336701	32.995	0.997583														a. Adjustment for multiple comparisons: Bonferroni. *. The mean difference is significant at the .05 level. b. The level combination of factors in (I) is not observed. c. The level combination of factors in (J) is not observed. d. Dependent Variable: AUC.
			Hotelling's trace	0.507615	8.249a	4	65	1.91719e-05	0.336701	32.995	0.997583
			Roy's largest root	0.507615	8.249a	4	65	1.91719e-05	0.336701	32.995	0.997583														Univariate Testsa
	Each F tests the multivariate simple effects of Time within each level combination of the other effects shown. These tests are based on the linearly independent pairwise comparisons among the estimated marginal means.																								Surgery	Day	Numerator df	Denominator df	F	Sig.
	a. Exact statistic b. Computed using alpha = .05																								Endo	Day -2	2	39	0.186574	0.830533
																										Day 7	2	39	2.68162	0.0810598
																										Day 14	2	39	108.528	1.15664e-16
	12. Surgery * Treatment * Time																								Sham	Day -2	0	.	.	.
																										Day 7	0	.	.	.
	Estimates																									Day 14	0	.	.	.
	Measure:Mechanicalsensitiviy																								Each F tests the simple effects of Treatment within each level combination of the other effects shown. These tests are based on the estimable linearly independent pairwise comparisons among the estimated marginal means.
	Surgery	Treatment	Time	Mean	Std. Error	95% Confidence Interval																			a. Dependent Variable: AUC.
						Lower Bound	Upper Bound
	Sham	Vehicle	1	5.84421	0.450047	4.94616	6.74227
			2	8.83684	0.714585	7.41091	10.2628																		13. Surgery * Treatment * Day
			3	7.40711	0.610983	6.18791	8.6263
			4	6.41132	0.61633	5.18145	7.64118																		Estimatesb
			5	5.33237	0.580345	4.17431	6.49043																		Surgery	Treatment	Day	Mean	Std. Error	df	95% Confidence Interval
		THC	1	6.61344	0.490427	5.6348	7.59207																								Lower Bound	Upper Bound
			2	8.35406	0.778701	6.80019	9.90794																		Endo	7daysTHC	Day -2	5.688	0.332052	39	5.01636	6.35964
			3	5.85656	0.665803	4.52797	7.18515																				Day 7	12.052	0.507792	39	11.0249	13.0791
			4	5.43844	0.67163	4.09822	6.77865																				Day 14	6.202	0.427245	39	5.33782	7.06618
			5	5.40812	0.632416	4.14616	6.67009																			AcuteTHC	Day -2	5.41111	0.350013	39	4.70314	6.11908
	Endo	Vehicle	1	5.93289	0.450047	5.03484	6.83095																				Day 7	10.8967	0.53526	39	9.814	11.9793
			2	11.8797	0.714585	10.4538	13.3057																				Day 14	5.66889	0.450355	39	4.75796	6.57982
			3	11.5911	0.610983	10.3719	12.8102																			Vehicle	Day -2	5.47583	0.30312	39	4.86271	6.08895
			4	10.9279	0.61633	9.69803	12.1578																				Day 7	12.515	0.463549	39	11.5774	13.4526
			5	11.3511	0.580345	10.193	12.5091																				Day 14	13.2767	0.390019	39	12.4878	14.0656
		THC	1	6.01528	0.462379	5.09261	6.93794																		Sham	7daysTHC	Day -2	.a	.	.	.	.
			2	8.8725	0.734166	7.40749	10.3375																				Day 7	.a	.	.	.	.
			3	7.72639	0.627725	6.47378	8.97899																				Day 14	.a	.	.	.	.
			4	6.29528	0.633219	5.03171	7.55885																			AcuteTHC	Day -2	.a	.	.	.	.
			5	5.67778	0.596248	4.48798	6.86757																				Day 7	.a	.	.	.	.
																											Day 14	.a	.	.	.	.
	Pairwise Comparisons																									Vehicle	Day -2	5.58833	0.30312	39	4.97521	6.20145
	Measure:Mechanicalsensitiviy																										Day 7	7.87333	0.463549	39	6.93572	8.81095
	Treatment	Time	(I) Surgery	(J) Surgery	Mean Difference (I-J)	Std. Error	Sig.a	95% Confidence Interval for Differencea																			Day 14	6.37333	0.390019	39	5.58445	7.16222
								Lower Bound	Upper Bound																a. This level combination of factors is not observed, thus the corresponding population marginal mean is not estimable. b. Dependent Variable: AUC.
	Vehicle	1	Sham	Endo	-0.0886842	0.636463	0.889594	-1.35873	1.18136
			Endo	Sham	0.0886842	0.636463	0.889594	-1.18136	1.35873																Pairwise Comparisonsd
		2	Sham	Endo	-3.043*	1.01058	0.00365207	-5.05947	-1.02632																Surgery	Treatment	(I) Day	(J) Day	Mean Difference (I-J)	Std. Error	df	Sig.a	95% Confidence Interval for Differencea
			Endo	Sham	3.043*	1.01058	0.00365207	1.02632	5.05947																								Lower Bound	Upper Bound
		3	Sham	Endo	-4.184*	0.86406	7.73977e-06	-5.90815	-2.45974																Endo	7daysTHC	Day -2	Day 7	-6.364*	0.606722	67.1972	2.58895e-15	-7.85374	-4.87426
			Endo	Sham	4.184*	0.86406	7.73977e-06	2.45974	5.90815																			Day 14	-0.514	0.541106	73.5197	1	-1.83971	0.811705
		4	Sham	Endo	-4.517*	0.871623	2.13532e-06	-6.25587	-2.77728																		Day 7	Day -2	6.364*	0.606722	67.1972	2.58895e-15	4.87426	7.85374
			Endo	Sham	4.517*	0.871623	2.13532e-06	2.77728	6.25587																			Day 14	5.850*	0.66362	75.7835	9.24756e-13	4.22527	7.47473
		5	Sham	Endo	-6.019*	0.820732	3.54869e-10	-7.65643	-4.38094																		Day 14	Day -2	0.514	0.541106	73.5197	1	-0.811705	1.83971
			Endo	Sham	6.019*	0.820732	3.54869e-10	4.38094	7.65643																			Day 7	-5.850*	0.66362	75.7835	9.24756e-13	-7.47473	-4.22527
	THC	1	Sham	Endo	0.59816	0.674028	0.37797	-0.746842	1.94316																	AcuteTHC	Day -2	Day 7	-5.486*	0.639541	67.1972	6.43936e-12	-7.05588	-3.91523
			Endo	Sham	-0.59816	0.674028	0.37797	-1.94316	0.746842																			Day 14	-0.257778	0.570376	73.5197	1	-1.65519	1.13964
		2	Sham	Endo	-0.518437	1.07022	0.629644	-2.65403	1.61716																		Day 7	Day -2	5.486*	0.639541	67.1972	6.43936e-12	3.91523	7.05588
			Endo	Sham	0.518437	1.07022	0.629644	-1.61716	2.65403																			Day 14	5.228*	0.699517	75.7835	3.39123e-10	3.51516	6.94039
		3	Sham	Endo	-1.870*	0.915059	0.0448905	-3.6958	-0.0438555																		Day 14	Day -2	0.257778	0.570376	73.5197	1	-1.13964	1.65519
			Endo	Sham	1.870*	0.915059	0.0448905	0.0438555	3.6958																			Day 7	-5.228*	0.699517	75.7835	3.39123e-10	-6.94039	-3.51516
		4	Sham	Endo	-0.85684	0.923068	0.35656	-2.69879	0.985112																	Vehicle	Day -2	Day 7	-7.039*	0.553859	67.1972	4.60892e-19	-8.3991	-5.67923
			Endo	Sham	0.85684	0.923068	0.35656	-0.985112	2.69879																			Day 14	-7.801*	0.49396	73.5197	7.47378e-25	-9.01103	-6.59064
		5	Sham	Endo	-0.269653	0.869173	0.757327	-2.00406	1.46476																		Day 7	Day -2	7.039*	0.553859	67.1972	4.60892e-19	5.67923	8.3991
			Endo	Sham	0.269653	0.869173	0.757327	-1.46476	2.00406																			Day 14	-0.761667	0.605799	75.7835	0.637526	-2.24483	0.7215
	Based on estimated marginal means																										Day 14	Day -2	7.801*	0.49396	73.5197	7.47378e-25	6.59064	9.01103
	a. Adjustment for multiple comparisons: Bonferroni. *. The mean difference is significant at the .05 level.																											Day 7	0.761667	0.605799	75.7835	0.637526	-0.7215	2.24483
																									Sham	7daysTHC	Day -2	Day 7	.b,c	.	.	.	.	.
	Univariate Tests																											Day 14	.b,c	.	.	.	.	.
	Measure:Mechanicalsensitiviy																										Day 7	Day -2	.b,c	.	.	.	.	.
	Treatment	Time		Sum of Squares	df	Mean Square	F	Sig.	Partial Eta Squared	Noncent. Parameter	Observed Powera																	Day 14	.b,c	.	.	.	.	.
	Vehicle	1	Contrast	0.0747164	1	0.0747164	0.0194154	0.889594	0.000285439	0.0194154	0.0521649																Day 14	Day -2	.b,c	.	.	.	.	.
			Error	261.685	68	3.8483																						Day 7	.b,c	.	.	.	.	.
		2	Contrast	87.9625	1	87.9625	9.06642	0.00365207	0.117644	9.06642	0.843346															AcuteTHC	Day -2	Day 7	.b,c	.	.	.	.	.
			Error	659.736	68	9.702																						Day 14	.b,c	.	.	.	.	.
		3	Contrast	166.301	1	166.301	23.4469	7.73977e-06	0.256399	23.4469	0.997545																Day 7	Day -2	.b,c	.	.	.	.	.
			Error	482.303	68	7.0927																						Day 14	.b,c	.	.	.	.	.
		4	Contrast	193.795	1	193.795	26.8511	2.13532e-06	0.283087	26.8511	0.999177																Day 14	Day -2	.b,c	.	.	.	.	.
			Error	490.783	68	7.2174																						Day 7	.b,c	.	.	.	.	.
		5	Contrast	344.133	1	344.133	53.7775	3.54869e-10	0.441605	53.7775	1															Vehicle	Day -2	Day 7	-2.285*	0.553859	67.1972	0.000312263	-3.64494	-0.925062
			Error	435.146	68	6.39921																						Day 14	-0.785	0.49396	73.5197	0.348922	-1.9952	0.425198
	THC	1	Contrast	3.03073	1	3.03073	0.787551	0.37797	0.011449	0.787551	0.14125																Day 7	Day -2	2.285*	0.553859	67.1972	0.000312263	0.925062	3.64494
			Error	261.685	68	3.8483																						Day 14	1.500*	0.605799	75.7835	0.0465452	0.0168335	2.98317
		2	Contrast	2.2767	1	2.2767	0.234663	0.629644	0.00343906	0.234663	0.0765166																Day 14	Day -2	0.785	0.49396	73.5197	0.348922	-0.425198	1.9952
			Error	659.736	68	9.702																						Day 7	-1.500*	0.605799	75.7835	0.0465452	-2.98317	-0.0168335
		3	Contrast	29.6153	1	29.6153	4.17546	0.0448905	0.0578516	4.17546	0.521778														Based on estimated marginal means
			Error	482.303	68	7.0927																			*. The mean difference is significant at the .05 level. a. Adjustment for multiple comparisons: Bonferroni. b. The level combination of factors in (I) is not observed. c. The level combination of factors in (J) is not observed. d. Dependent Variable: AUC.
		4	Contrast	6.2189	1	6.2189	0.861654	0.35656	0.0125128	0.861654	0.150083
			Error	490.783	68	7.2174																			Univariate Testsa
		5	Contrast	0.615919	1	0.615919	0.0962492	0.757327	0.00141343	0.0962492	0.0607859														Surgery	Treatment	Numerator df	Denominator df	F	Sig.
			Error	435.146	68	6.39921																			Endo	7daysTHC	2	88.5092	58.7417	5.81597e-17
	Each F tests the simple effects of Surgery within each level combination of the other effects shown. These tests are based on the linearly independent pairwise comparisons among the estimated marginal means.																									AcuteTHC	2	88.5092	40.1096	3.97994e-13
	a. Computed using alpha = .05																									Vehicle	2	88.5092	155.607	1.05525e-29
																									Sham	7daysTHC	0	.	.	.
																										AcuteTHC	0	.	.	.
	13. Surgery * Treatment * Time																									Vehicle	2	88.5092	8.53366	0.000408348
																									Each F tests the simple effects of Day within each level combination of the other effects shown. These tests are based on the estimable linearly independent pairwise comparisons among the estimated marginal means.
	Estimates																								a. Dependent Variable: AUC.
	Measure:Mechanicalsensitiviy
	Surgery	Treatment	Time	Mean	Std. Error	95% Confidence Interval
						Lower Bound	Upper Bound
	Sham	Vehicle	1	5.84421	0.450047	4.94616	6.74227
			2	8.83684	0.714585	7.41091	10.2628
			3	7.40711	0.610983	6.18791	8.6263
			4	6.41132	0.61633	5.18145	7.64118
			5	5.33237	0.580345	4.17431	6.49043
		THC	1	6.61344	0.490427	5.6348	7.59207
			2	8.35406	0.778701	6.80019	9.90794
			3	5.85656	0.665803	4.52797	7.18515
			4	5.43844	0.67163	4.09822	6.77865
			5	5.40812	0.632416	4.14616	6.67009
	Endo	Vehicle	1	5.93289	0.450047	5.03484	6.83095
			2	11.8797	0.714585	10.4538	13.3057
			3	11.5911	0.610983	10.3719	12.8102
			4	10.9279	0.61633	9.69803	12.1578
			5	11.3511	0.580345	10.193	12.5091
		THC	1	6.01528	0.462379	5.09261	6.93794
			2	8.8725	0.734166	7.40749	10.3375
			3	7.72639	0.627725	6.47378	8.97899
			4	6.29528	0.633219	5.03171	7.55885
			5	5.67778	0.596248	4.48798	6.86757
	Pairwise Comparisons
	Measure:Mechanicalsensitiviy
	Surgery	Time	(I) Treatment	(J) Treatment	Mean Difference (I-J)	Std. Error	Sig.a	95% Confidence Interval for Differencea
								Lower Bound	Upper Bound
	Sham	1	Vehicle	THC	-0.769227	0.665628	0.251873	-2.09747	0.559014
			THC	Vehicle	0.769227	0.665628	0.251873	-0.559014	2.09747
		2	Vehicle	THC	0.48278	1.05689	0.649275	-1.6262	2.59176
			THC	Vehicle	-0.48278	1.05689	0.649275	-2.59176	1.6262
		3	Vehicle	THC	1.55054	0.903656	0.0907416	-0.252674	3.35376
			THC	Vehicle	-1.55054	0.903656	0.0907416	-3.35376	0.252674
		4	Vehicle	THC	0.972878	0.911565	0.289628	-0.846121	2.79188
			THC	Vehicle	-0.972878	0.911565	0.289628	-2.79188	0.846121
		5	Vehicle	THC	-0.0757566	0.858342	0.92993	-1.78855	1.63704
			THC	Vehicle	0.0757566	0.858342	0.92993	-1.63704	1.78855
	Endo	1	Vehicle	THC	-0.082383	0.645242	0.898781	-1.36994	1.20518
			THC	Vehicle	0.082383	0.645242	0.898781	-1.20518	1.36994
		2	Vehicle	THC	3.007*	1.02452	0.00454205	0.962848	5.05163
			THC	Vehicle	-3.007*	1.02452	0.00454205	-5.05163	-0.962848
		3	Vehicle	THC	3.865*	0.875979	3.74917e-05	2.11668	5.61265
			THC	Vehicle	-3.865*	0.875979	3.74917e-05	-5.61265	-2.11668
		4	Vehicle	THC	4.633*	0.883646	1.68963e-06	2.86933	6.3959
			THC	Vehicle	-4.633*	0.883646	1.68963e-06	-6.3959	-2.86933
		5	Vehicle	THC	5.673*	0.832053	3.00784e-09	4.01294	7.33361
			THC	Vehicle	-5.673*	0.832053	3.00784e-09	-7.33361	-4.01294
	Based on estimated marginal means
	a. Adjustment for multiple comparisons: Bonferroni. *. The mean difference is significant at the .05 level.
	Univariate Tests
	Measure:Mechanicalsensitiviy
	Surgery	Time		Sum of Squares	df	Mean Square	F	Sig.	Partial Eta Squared	Noncent. Parameter	Observed Powera
	Sham	1	Contrast	5.13943	1	5.13943	1.3355	0.251873	0.0192615	1.3355	0.206906
			Error	261.685	68	3.8483
		2	Contrast	2.02443	1	2.02443	0.208661	0.649275	0.00305916	0.208661	0.0735432
			Error	659.736	68	9.702
		3	Contrast	20.882	1	20.882	2.94416	0.0907416	0.0414997	2.94416	0.394349
			Error	482.303	68	7.0927
		4	Contrast	8.22096	1	8.22096	1.13905	0.289628	0.0164747	1.13905	0.183307
			Error	490.783	68	7.2174
		5	Contrast	0.0498478	1	0.0498478	0.00778969	0.92993	0.000114541	0.00778969	0.0508679
			Error	435.146	68	6.39921
	Endo	1	Contrast	0.0627336	1	0.0627336	0.0163016	0.898781	0.000239672	0.0163016	0.0518173
			Error	261.685	68	3.8483
		2	Contrast	83.591	1	83.591	8.61585	0.00454205	0.112455	8.61585	0.824751
			Error	659.736	68	9.702
		3	Contrast	138.054	1	138.054	19.4642	3.74917e-05	0.222539	19.4642	0.991547
			Error	482.303	68	7.0927
		4	Contrast	198.371	1	198.371	27.4851	1.68963e-06	0.287847	27.4851	0.99933
			Error	490.783	68	7.2174
		5	Contrast	297.503	1	297.503	46.4907	3.00784e-09	0.406065	46.4907	0.999999
			Error	435.146	68	6.39921
	Each F tests the simple effects of Treatment within each level combination of the other effects shown. These tests are based on the linearly independent pairwise comparisons among the estimated marginal means.
	a. Computed using alpha = .05

## Sheet: Figure 3-figure supplement 1
	Figure 3-figure supplement 1
Raw data	Day -1																															Day 7
		Frequency of response (out of ten applications)																															Frequency of response (out of ten applications)
		Sham-Vehicle							Endo - Vehicle							Sham - THC							Endo - THC										Sham-Vehicle							Endo - Vehicle							Sham - THC
	von Frey filament	1.65	2.36	2.44	2.83	3.22	3.61	AUC	1.65	2.36	2.44	2.83	3.22	3.61	AUC	1.65	2.36	2.44	2.83	3.22	3.61	AUC	1.65	2.36	2.44	2.83	3.22	3.61	AUC			von Frey filament	1.65	2.36	2.44	2.83	3.22	3.61	AUC	1.65	2.36	2.44	2.83	3.22	3.61	AUC	1.65	2.36	2.44
		2	3	2	3	1	3	4.51	1	3	4	3	3	2	5.21	2	3	2	2	2	4	4.705	1	3	3	3	4	4	5.755				4	3	6	4	5	5	8.5	3	7	7	8	10	10	14.445	3	5	4
		2	2	3	4	3	5	5.91	2	4	4	3	4	6	7.13	1	2	3	4	3	5	5.555	1	1	1	1	2	5	3.13				2	6	6	7	8	8	11.9	8	10	10	10	10	10	18.89	2	4	4
		1	1	1	4	3	2	4.105	2	4	2	2	2	3	4.905	3	5	3	3	4	3	7.06	1	2	4	2	2	2	4.035				2	2	6	5	7	10	9.54	3	4	5	7	7	6	10.45	4	4	4
		2	2	2	4	3	6	5.87	2	4	4	4	3	4	6.74	3	3	3	4	4	4	6.855	2	4	6	5	5	5	8.575				3	2	4	6	5	5	8.06	5	10	10	10	10	10	17.825	3	4	4
		3	4	4	5	5	6	8.655	0	2	2	2	3	4	3.99	1	4	3	4	4	5	6.735	0	4	4	4	5	5	7.005				5	9	7	8	10	10	15.945	0	5	4	5	7	6	8.765	2	3	5
		0	1	2	2	2	2	2.815	1	3	4	3	4	5	6.185	3	2	5	4	3	4	6.54	3	3	4	2	2	2	5.14				3	3	4	4	5	7	8.065	5	6	6	5	6	8	11.405	4	4	3
		2	2	1	3	3	2	4.465	2	1	2	2	3	3	4.11	3	1	2	2	3	2	4.27	1	0	1	3	3	2	3.32				2	2	3	3	3	6	5.715	2	4	5	5	5	5	8.34	1	1	2
		0	2	3	2	4	4	4.615	2	3	1	3	3	2	4.86	2	5	5	5	6	7	9.515	0	3	2	5	4	4	5.945				2	4	4	4	5	6	7.91	1	2	5	6	5	5	7.585	3	9	9
		3	5	3	4	3	4	7.255	1	4	3	4	4	4	6.54	0	4	4	5	5	6	7.59	4	5	4	4	4	3	8.04				2	2	4	3	4	4	5.95	5	5	6	8	9	8	13.35	3	5	5
		2	3	3	6	4	5	7.475	1	3	3	6	5	4	7.315	3	6	4	4	4	5	8.47	1	2	1	1	3	3	3.525				3	3	5	6	7	7	9.86	4	7	6	10	10	10	15.345	3	5	5
		1	1	1	2	2	3	3.13	3	4	5	6	7	8	10.45	3	2	4	4	5	3	6.89	2	3	3	5	3	7	7.085				4	3	7	5	7	6	10.1	3	6	7	6	8	8	12.1	1	2	2
		1	2	1	1	2	4	3.33	2	1	1	2	2	5	3.875	1	2	4	6	6	8	8.325	1	4	7	6	9	9	11.185				1	2	3	2	3	4	4.58	3	3	4	4	5	6	7.87	3	1	1
		0	3	3	4	4	3	5.595	4	4	2	5	4	4	7.76	1	3	2	1	2	3	3.765	2	2	3	3	4	3	5.52				1	4	4	3	3	5	6.19	4	4	5	6	5	5	9.44	1	3	4
		1	2	3	4	6	5	6.725	1	4	5	5	4	6	7.79	2	6	5	5	6	6	9.715	2	4	3	2	3	5	5.92				4	5	5	7	7	8	11.59	8	7	7	9	7	8	15.05	4	6	5
		1	3	3	2	3	4	4.975	0	2	2	3	2	4	3.99	2	0	3	2	2	2	3.365	2	3	4	5	7	6	8.685				4	5	5	7	7	7	11.395	4	5	6	7	10	10	13.385	0	0	2
		1	5	5	6	5	7	9.16	1	2	1	3	2	3	3.915	2	3	2	4	4	5	6.46	1	2	2	3	4	6	5.515				0	0	1	5	3	2	3.745	4	4	5	4	6	5	9.05	3	3	5
		1	2	3	4	3	4	5.36	1	2	2	3	2	3	4.15								0	2	2	4	4	5	5.355				1	1	3	3	3	4	4.575	4	3	4	6	4	6	8.615
		2	2	2	6	6	6	7.82	1	0	5	3	6	9	6.795								1	2	2	4	2	3	4.54				5	4	6	7	7	8	11.785	2	7	8	8	7	8	12.765
		2	3	4	6	6	9	9.27	1	5	5	4	3	4	7.015																		3	7	7	8	7	6	12.495	4	4	6	6	7	8	11.04
	Mean	1.42105	2.52632	2.57895	3.78947	3.57895	4.42105	5.84421	1.47368	2.89474	3	3.47368	3.47368	4.36842	5.93289	2	3.1875	3.375	3.6875	3.9375	#DIV/0!	6.61344	1.38889	2.72222	3.11111	3.44444	3.88889	4.38889	6.01528			Mean	2.68421	3.52632	4.73684	5.10526	5.57895	6.21053	8.83684	3.78947	5.42105	6.10526	6.84211	7.26316	7.47368	11.8797	2.5	3.6875	4
	SD	0.901591	1.17229	1.1213	1.54844	1.46499	1.83533	2.00139	0.964274	1.32894	1.45297	1.26352	1.38918	1.83214	1.80464	0.966092	1.72119	1.08781	1.35247	1.38894	#DIV/0!	1.90904	1.0369	1.22741	1.64098	1.46417	1.81137	1.88302	2.11851			SD	1.41628	2.1697	1.62761	1.88251	2.06332	2.0704	3.2379	1.98827	2.19382	1.76052	1.95116	2.05053	1.92551	3.35605	1.21106	2.18232	1.8619
	SEM	0.206839	0.268942	0.257243	0.355236	0.336092	0.421053	0.45915	0.22122	0.30488	0.333333	0.289872	0.3187	0.420321	0.414012	0.241523	0.430298	0.271953	0.338117	0.347236	#DIV/0!	0.477261	0.2444	0.289303	0.386782	0.345108	0.426943	0.443831	0.499337			SEM	0.324917	0.497764	0.3734	0.431878	0.473359	0.474982	0.742825	0.45614	0.503298	0.40389	0.447626	0.470424	0.441743	0.769932	0.302765	0.545579	0.465475
	CI	-0.382128	0.181731	0.336351	0.692597	0.648965	0.750401	1.84144	-0.454864	0.236857	0.0940674	0.946638	0.695322	0.704148	2.32362	0.0678164	-0.254883	1.19938	0.982566	1.15961	#DIV/0!	2.79535	-0.684913	0.267402	-0.170846	0.516106	0.266157	0.622856	1.77827			CI	-0.148349	-0.813086	1.48162	1.34023	1.4523	2.06973	2.36105	-0.187066	1.0334	2.58423	2.93979	3.1621	3.62266	5.16763	0.0778797	-0.677131	0.276203
		3.22423	4.8709	4.82154	6.88635	6.50893	8.0917	9.84698	3.40223	5.55262	5.90593	6.00073	6.25205	8.03269	9.54217	3.93218	6.62988	5.55062	6.39243	6.71539	#DIV/0!	10.4315	3.46269	5.17704	6.39307	6.37278	7.51162	8.15492	10.2523				5.51677	7.86572	7.99207	8.87029	9.7056	10.3513	15.3126	7.76601	9.8087	9.62629	10.7444	11.3642	11.3247	18.5918	4.92212	8.05213	7.7238
Statistics	Within-Subjects Factors																															Within-Subjects Factors
	Measure:	Frequencyofresponse																														Measure:	Frequencyofresponse
	Filament	Dependent Variable																														Filament	Dependent Variable
	1	1.65																														1	1.65
	2	2.36																														2	2.36
	3	2.44																														3	2.44
	4	2.83																														4	2.83
	5	3.22																														5	3.22
	6	3.61																														6	3.61
	Between-Subjects Factors																															Between-Subjects Factors
			Value Label	N																														Value Label	N
	Surgery	,00	Sham	35																												Surgery	,00	Sham	35
		1,00	Endo	37																													1,00	Endo	37
	Treatment	,00	Vehicle	38																												Treatment	,00	Vehicle	38
		1,00	THC	34																													1,00	THC	34
	Descriptive Statistics																															Descriptive Statistics
	Surgery			Mean	Std. Deviation	N																										Surgery			Mean	Std. Deviation	N
	1.65	Sham	Vehicle	1.42105	0.901591	19																										1.65	Sham	Vehicle	2.68421	1.41628	19
			THC	2	0.966092	16																												THC	2.5	1.21106	16
			Total	1.68571	0.963188	35																												Total	2.6	1.31059	35
		Endo	Vehicle	1.47368	0.964274	19																											Endo	Vehicle	3.78947	1.98827	19
			THC	1.38889	1.0369	18																												THC	3	1.37199	18
			Total	1.43243	0.987155	37																												Total	3.40541	1.7394	37
		Total	Vehicle	1.44737	0.921144	38																											Total	Vehicle	3.23684	1.79239	38
			THC	1.67647	1.03633	34																												THC	2.76471	1.30405	34
			Total	1.55556	0.977045	72																												Total	3.01389	1.58774	72
	2.36	Sham	Vehicle	2.52632	1.17229	19																										2.36	Sham	Vehicle	3.52632	2.1697	19
			THC	3.1875	1.72119	16																												THC	3.6875	2.18232	16
			Total	2.82857	1.465	35																												Total	3.6	2.14476	35
		Endo	Vehicle	2.89474	1.32894	19																											Endo	Vehicle	5.42105	2.19382	19
			THC	2.72222	1.22741	18																												THC	3.55556	1.42343	18
			Total	2.81081	1.26574	37																												Total	4.51351	2.06319	37
		Total	Vehicle	2.71053	1.25004	38																											Total	Vehicle	4.47368	2.35655	38
			THC	2.94118	1.47589	34																												THC	3.61765	1.79249	34
			Total	2.81944	1.35653	72																												Total	4.06944	2.13836	72
	2.44	Sham	Vehicle	2.57895	1.1213	19																										2.44	Sham	Vehicle	4.73684	1.62761	19
			THC	3.375	1.08781	16																												THC	4	1.8619	16
			Total	2.94286	1.16171	35																												Total	4.4	1.75231	35
		Endo	Vehicle	3	1.45297	19																											Endo	Vehicle	6.10526	1.76052	19
			THC	3.11111	1.64098	18																												THC	4.88889	1.81137	18
			Total	3.05405	1.52654	37																												Total	5.51351	1.8652	37
		Total	Vehicle	2.78947	1.29777	38																											Total	Vehicle	5.42105	1.81035	38
			THC	3.23529	1.3939	34																												THC	4.47059	1.86247	34
			Total	3	1.35314	72																												Total	4.97222	1.88375	72
	2.83	Sham	Vehicle	3.78947	1.54844	19																										2.83	Sham	Vehicle	5.10526	1.88251	19
			THC	3.6875	1.35247	16																												THC	5.125	1.70783	16
			Total	3.74286	1.44187	35																												Total	5.11429	1.77849	35
		Endo	Vehicle	3.47368	1.26352	19																											Endo	Vehicle	6.84211	1.95116	19
			THC	3.44444	1.46417	18																												THC	5.16667	1.91741	18
			Total	3.45946	1.34566	37																												Total	6.02703	2.08815	37
		Total	Vehicle	3.63158	1.40311	38																											Total	Vehicle	5.97368	2.08582	38
			THC	3.55882	1.39677	34																												THC	5.14706	1.79448	34
			Total	3.59722	1.39071	72																												Total	5.58333	1.98409	72
	3.22	Sham	Vehicle	3.57895	1.46499	19																										3.22	Sham	Vehicle	5.57895	2.06332	19
			THC	3.9375	1.38894	16																												THC	5.0625	2.29401	16
			Total	3.74286	1.42133	35																												Total	5.34286	2.15492	35
		Endo	Vehicle	3.47368	1.38918	19																											Endo	Vehicle	7.26316	2.05053	19
			THC	3.88889	1.81137	18																												THC	5.66667	1.97037	18
			Total	3.67568	1.59955	37																												Total	6.48649	2.14245	37
		Total	Vehicle	3.52632	1.40918	38																											Total	Vehicle	6.42105	2.20112	38
			THC	3.91176	1.60242	34																												THC	5.38235	2.11796	34
			Total	3.70833	1.50527	72																												Total	5.93056	2.20962	72
	3.61	Sham	Vehicle	4.42105	1.83533	19																										3.61	Sham	Vehicle	6.21053	2.0704	19
			THC	4.5	1.7127	16																												THC	5.625	1.82117	16
			Total	4.45714	1.75471	35																												Total	5.94286	1.95453	35
		Endo	Vehicle	4.36842	1.83214	19																											Endo	Vehicle	7.47368	1.92551	19
			THC	4.38889	1.88302	18																												THC	5.27778	1.77584	18
			Total	4.37838	1.83108	37																												Total	6.40541	2.14035	37
		Total	Vehicle	4.39474	1.80898	38																											Total	Vehicle	6.84211	2.07334	38
			THC	4.44118	1.77851	34																												THC	5.44118	1.77851	34
			Total	4.41667	1.78215	72																												Total	6.18056	2.05095	72
	Multivariate Testsa																															Multivariate Testsa
	Effect		Value	F	Hypothesis df	Error df	Sig.	Partial Eta Squared	Noncent. Parameter	Observed Powerc																						Effect		Value	F	Hypothesis df	Error df	Sig.	Partial Eta Squared	Noncent. Parameter	Observed Powerc
	Filament	Pillai's Trace	0.69472	29,129b	5	64	2.75875e-15	0.69472	145.644	1																						Filament	Pillai's Trace	0.819806	58,235b	5	64	1.65049e-22	0.819806	291.173	1
		Wilks' Lambda	0.30528	29,129b	5	64	2.75875e-15	0.69472	145.644	1																							Wilks' Lambda	0.180194	58,235b	5	64	1.65049e-22	0.819806	291.173	1
		Hotelling's Trace	2.27568	29,129b	5	64	2.75875e-15	0.69472	145.644	1																							Hotelling's Trace	4.54957	58,235b	5	64	1.65049e-22	0.819806	291.173	1
		Roy's Largest Root	2.27568	29,129b	5	64	2.75875e-15	0.69472	145.644	1																							Roy's Largest Root	4.54957	58,235b	5	64	1.65049e-22	0.819806	291.173	1
	Filament * Surgery	Pillai's Trace	0.026681	,351b	5	64	0.87985	0.026681	1.75439	0.1334																						Filament * Surgery	Pillai's Trace	0.0946195	1,338b	5	64	0.259864	0.0946195	6.68851	0.442821
		Wilks' Lambda	0.973319	,351b	5	64	0.87985	0.026681	1.75439	0.1334																							Wilks' Lambda	0.905381	1,338b	5	64	0.259864	0.0946195	6.68851	0.442821
		Hotelling's Trace	0.0274124	,351b	5	64	0.87985	0.026681	1.75439	0.1334																							Hotelling's Trace	0.104508	1,338b	5	64	0.259864	0.0946195	6.68851	0.442821
		Roy's Largest Root	0.0274124	,351b	5	64	0.87985	0.026681	1.75439	0.1334																							Roy's Largest Root	0.104508	1,338b	5	64	0.259864	0.0946195	6.68851	0.442821
	Filament * Treatment	Pillai's Trace	0.0675232	,927b	5	64	0.469565	0.0675232	4.63442	0.310034																						Filament * Treatment	Pillai's Trace	0.0769208	1,067b	5	64	0.387209	0.0769208	5.33316	0.35558
		Wilks' Lambda	0.932477	,927b	5	64	0.469565	0.0675232	4.63442	0.310034																							Wilks' Lambda	0.923079	1,067b	5	64	0.387209	0.0769208	5.33316	0.35558
		Hotelling's Trace	0.0724128	,927b	5	64	0.469565	0.0675232	4.63442	0.310034																							Hotelling's Trace	0.0833306	1,067b	5	64	0.387209	0.0769208	5.33316	0.35558
		Roy's Largest Root	0.0724128	,927b	5	64	0.469565	0.0675232	4.63442	0.310034																							Roy's Largest Root	0.0833306	1,067b	5	64	0.387209	0.0769208	5.33316	0.35558
	Filament * Surgery * Treatment	Pillai's Trace	0.0350964	,466b	5	64	0.800451	0.0350964	2.32787	0.165777																						Filament * Surgery * Treatment	Pillai's Trace	0.131869	1,944b	5	64	0.0992002	0.131869	9.7216	0.619452
		Wilks' Lambda	0.964904	,466b	5	64	0.800451	0.0350964	2.32787	0.165777																							Wilks' Lambda	0.868131	1,944b	5	64	0.0992002	0.131869	9.7216	0.619452
		Hotelling's Trace	0.0363729	,466b	5	64	0.800451	0.0350964	2.32787	0.165777																							Hotelling's Trace	0.1519	1,944b	5	64	0.0992002	0.131869	9.7216	0.619452
		Roy's Largest Root	0.0363729	,466b	5	64	0.800451	0.0350964	2.32787	0.165777																							Roy's Largest Root	0.1519	1,944b	5	64	0.0992002	0.131869	9.7216	0.619452
	a. Design: Intercept + Surgery + Treatment + Surgery * Treatment Within Subjects Design: Filament																															a. Design: Intercept + Surgery + Treatment + Surgery * Treatment Within Subjects Design: Filament
	b. Exact statistic																															b. Exact statistic
	c. Computed using alpha = ,05																															c. Computed using alpha = ,05
	Mauchly's Test of Sphericitya																															Mauchly's Test of Sphericitya
	Measure:	Frequencyofresponse																														Measure:	Frequencyofresponse
	Within Subjects Effect	Mauchly's W	Approx. Chi-Square	df	Sig.	Epsilonb																										Within Subjects Effect	Mauchly's W	Approx. Chi-Square	df	Sig.	Epsilonb
						Greenhouse-Geisser	Huynh-Feldt	Lower-bound																													Greenhouse-Geisser	Huynh-Feldt	Lower-bound
	Filament	0.411416	58.7068	14	2.0097e-07	0.697784	0.772587	0.2																								Filament	0.571389	36.9952	14	0.000744006	0.810966	0.906863	0.2
	Tests the null hypothesis that the error covariance matrix of the orthonormalized transformed dependent variables is proportional to an identity matrix.																															Tests the null hypothesis that the error covariance matrix of the orthonormalized transformed dependent variables is proportional to an identity matrix.
	a. Design: Intercept + Surgery + Treatment + Surgery * Treatment Within Subjects Design: Filament																															a. Design: Intercept + Surgery + Treatment + Surgery * Treatment Within Subjects Design: Filament
	b. May be used to adjust the degrees of freedom for the averaged tests of significance. Corrected tests are displayed in the Tests of Within-Subjects Effects table.																															b. May be used to adjust the degrees of freedom for the averaged tests of significance. Corrected tests are displayed in the Tests of Within-Subjects Effects table.
	Tests of Within-Subjects Effects																															Tests of Within-Subjects Effects
	Measure:	Frequencyofresponse																														Measure:	Frequencyofresponse
	Source		Type III Sum of Squares	df	Mean Square	F	Sig.	Partial Eta Squared	Noncent. Parameter	Observed Powera																						Source		Type III Sum of Squares	df	Mean Square	F	Sig.	Partial Eta Squared	Noncent. Parameter	Observed Powera
	Filament	Sphericity Assumed	339.525	5	67.905	57.3647	3.62045e-43	0.457582	286.823	1																						Filament	Sphericity Assumed	525.387	5	105.077	86.9155	1.15794e-58	0.561051	434.577	1
		Greenhouse-Geisser	339.525	3.48892	97.3153	57.3647	6.60674e-31	0.457582	200.141	1																							Greenhouse-Geisser	525.387	4.05483	129.571	86.9155	4.39116e-48	0.561051	352.427	1
		Huynh-Feldt	339.525	3.86293	87.893	57.3647	6.06597e-34	0.457582	221.596	1																							Huynh-Feldt	525.387	4.53432	115.869	86.9155	1.88315e-53	0.561051	394.102	1
		Lower-bound	339.525	1	339.525	57.3647	1.30055e-10	0.457582	57.3647	1																							Lower-bound	525.387	1	525.387	86.9155	8.84989e-14	0.561051	86.9155	1
	Filament * Surgery	Sphericity Assumed	1.76358	5	0.352717	0.297967	0.913862	0.00436276	1.48984	0.124754																						Filament * Surgery	Sphericity Assumed	5.65493	5	1.13099	0.935502	0.457976	0.0135707	4.67751	0.334443
		Greenhouse-Geisser	1.76358	3.48892	0.505481	0.297967	0.855239	0.00436276	1.03958	0.111518																							Greenhouse-Geisser	5.65493	4.05483	1.39462	0.935502	0.444644	0.0135707	3.7933	0.297638
		Huynh-Feldt	1.76358	3.86293	0.45654	0.297967	0.873226	0.00436276	1.15103	0.114928																							Huynh-Feldt	5.65493	4.53432	1.24714	0.935502	0.451818	0.0135707	4.24186	0.316552
		Lower-bound	1.76358	1	1.76358	0.297967	0.586946	0.00436276	0.297967	0.0837883																							Lower-bound	5.65493	1	5.65493	0.935502	0.336865	0.0135707	0.935502	0.158907
	Filament * Treatment	Sphericity Assumed	3.48027	5	0.696054	0.588011	0.70919	0.00857309	2.94005	0.215081																						Filament * Treatment	Sphericity Assumed	7.94005	5	1.58801	1.31353	0.257697	0.0189506	6.56767	0.464553
		Greenhouse-Geisser	3.48027	3.48892	0.997521	0.588011	0.648672	0.00857309	2.05152	0.182134																							Greenhouse-Geisser	7.94005	4.05483	1.95817	1.31353	0.264779	0.0189506	5.32615	0.411684
		Huynh-Feldt	3.48027	3.86293	0.900939	0.588011	0.665731	0.00857309	2.27145	0.190535																							Huynh-Feldt	7.94005	4.53432	1.7511	1.31353	0.261277	0.0189506	5.95598	0.43904
		Lower-bound	3.48027	1	3.48027	0.588011	0.445843	0.00857309	0.588011	0.117612																							Lower-bound	7.94005	1	7.94005	1.31353	0.255773	0.0189506	1.31353	0.204267
	Filament * Surgery * Treatment	Sphericity Assumed	3.91197	5	0.782395	0.66095	0.653342	0.00962629	3.30475	0.239522																						Filament * Surgery * Treatment	Sphericity Assumed	8.81914	5	1.76383	1.45896	0.202744	0.0210047	7.29481	0.512218
		Greenhouse-Geisser	3.91197	3.48892	1.12126	0.66095	0.599254	0.00962629	2.306	0.201035																							Greenhouse-Geisser	8.81914	4.05483	2.17497	1.45896	0.214294	0.0210047	5.91584	0.454385
		Huynh-Feldt	3.91197	3.86293	1.01269	0.66095	0.614417	0.00962629	2.55321	0.210845																							Huynh-Feldt	8.81914	4.53432	1.94498	1.45896	0.208408	0.0210047	6.6154	0.484416
		Lower-bound	3.91197	1	3.91197	0.66095	0.419062	0.00962629	0.66095	0.126225																							Lower-bound	8.81914	1	8.81914	1.45896	0.231279	0.0210047	1.45896	0.221729
	Error(Filament)	Sphericity Assumed	402.473	340	1.18374																											Error(Filament)	Sphericity Assumed	411.047	340	1.20896
		Greenhouse-Geisser	402.473	237.246	1.69643																												Greenhouse-Geisser	411.047	275.728	1.49077
		Huynh-Feldt	402.473	262.68	1.53218																												Huynh-Feldt	411.047	308.334	1.33312
		Lower-bound	402.473	68	5.91871																												Lower-bound	411.047	68	6.0448
	a. Computed using alpha = ,05																															a. Computed using alpha = ,05
	Tests of Within-Subjects Contrasts																															Tests of Within-Subjects Contrasts
	Measure:	Frequencyofresponse																														Measure:	Frequencyofresponse
	Source		Type III Sum of Squares	df	Mean Square	F	Sig.	Partial Eta Squared	Noncent. Parameter	Observed Powera																						Source		Type III Sum of Squares	df	Mean Square	F	Sig.	Partial Eta Squared	Noncent. Parameter	Observed Powera
	Filament	Linear	312.992	1	312.992	117.924	1.68803e-16	0.634258	117.924	1																						Filament	Linear	492.204	1	492.204	255.875	9.68463e-25	0.790043	255.875	1
		Quadratic	7.98718	1	7.98718	8.25294	0.00542275	0.108231	8.25294	0.808407																							Quadratic	32.8885	1	32.8885	25.0372	4.21317e-06	0.269109	25.0372	0.998521
		Cubic	12.9501	1	12.9501	13.5822	0.000454496	0.166485	13.5822	0.952827																							Cubic	0.0465845	1	0.0465845	0.0411447	0.839865	0.000604703	0.0411447	0.0545944
		Order 4	0.488136	1	0.488136	0.839019	0.362914	0.0121881	0.839019	0.147382																							Order 4	0.236336	1	0.236336	0.249597	0.618971	0.00365713	0.249597	0.0782279
		Order 5	5.10759	1	5.10759	6.70758	0.0117346	0.0897845	6.70758	0.723483																							Order 5	0.0110752	1	0.0110752	0.0152022	0.902235	0.000223512	0.0152022	0.0516946
	Filament * Surgery	Linear	0.0755326	1	0.0755326	0.0284578	0.866538	0.000418322	0.0284578	0.053175																						Filament * Surgery	Linear	0.352879	1	0.352879	0.183446	0.669782	0.00269048	0.183446	0.0706676
		Quadratic	0.16394	1	0.16394	0.169394	0.681945	0.0024849	0.169394	0.0690685																							Quadratic	3.06974	1	3.06974	2.33691	0.130979	0.0332245	2.33691	0.325596
		Cubic	0.682247	1	0.682247	0.715545	0.400576	0.0104132	0.715545	0.132693																							Cubic	0.675407	1	0.675407	0.596537	0.442579	0.00869631	0.596537	0.118617
		Order 4	0.0956568	1	0.0956568	0.164417	0.686395	0.00241207	0.164417	0.0685027																							Order 4	0.38953	1	0.38953	0.411388	0.523422	0.00601344	0.411388	0.0969237
		Order 5	0.746208	1	0.746208	0.979963	0.325717	0.0142065	0.979963	0.164228																							Order 5	1.16737	1	1.16737	1.60238	0.209886	0.0230219	1.60238	0.238915
	Filament * Treatment	Linear	0.297575	1	0.297575	0.112115	0.73878	0.00164603	0.112115	0.0625764																						Filament * Treatment	Linear	6.35499	1	6.35499	3.30368	0.0735304	0.0463325	3.30368	0.433363
		Quadratic	0.104245	1	0.104245	0.107713	0.743771	0.00158151	0.107713	0.0620793																							Quadratic	0.0145625	1	0.0145625	0.011086	0.916456	0.000163003	0.011086	0.0512354
		Cubic	0.000844173	1	0.000844173	0.000885375	0.976349	1.302e-05	0.000885375	0.0500986																							Cubic	1.35068	1	1.35068	1.19295	0.278589	0.0172409	1.19295	0.189781
		Order 4	0.431086	1	0.431086	0.740962	0.392378	0.010779	0.740962	0.135711																							Order 4	0.0366629	1	0.0366629	0.0387203	0.844591	0.000569092	0.0387203	0.0543229
		Order 5	2.64652	1	2.64652	3.47556	0.0665984	0.0486259	3.47556	0.451513																							Order 5	0.183158	1	0.183158	0.251411	0.617703	0.00368359	0.251411	0.0784359
	Filament * Surgery * Treatment	Linear	2.66548	1	2.66548	1.00425	0.319837	0.0145535	1.00425	0.167138																						Filament * Surgery * Treatment	Linear	0.740067	1	0.740067	0.384728	0.537157	0.00562593	0.384728	0.0938247
		Quadratic	0.00791124	1	0.00791124	0.00817447	0.928225	0.000120198	0.00817447	0.0509108																							Quadratic	0.0282013	1	0.0282013	0.0214689	0.883942	0.00031562	0.0214689	0.0523942
		Cubic	0.96768	1	0.96768	1.01491	0.317301	0.0147057	1.01491	0.168415																							Cubic	1.14677	1	1.14677	1.01285	0.317788	0.0146763	1.01285	0.168168
		Order 4	0.0236437	1	0.0236437	0.0406394	0.840837	0.000597282	0.0406394	0.0545378																							Order 4	1.21394	1	1.21394	1.28206	0.261494	0.0185049	1.28206	0.200485
		Order 5	0.24726	1	0.24726	0.324716	0.570665	0.00475254	0.324716	0.0868742																							Order 5	5.69017	1	5.69017	7.81055	0.00674386	0.103027	7.81055	0.786724
	Error(Filament)	Linear	180.485	68	2.65419																											Error(Filament)	Linear	130.805	68	1.92361
		Quadratic	65.8103	68	0.967798																												Quadratic	89.3241	68	1.31359
		Cubic	64.8355	68	0.953464																												Cubic	76.9905	68	1.13221
		Order 4	39.5619	68	0.581793																												Order 4	64.387	68	0.946867
		Order 5	51.7796	68	0.761465																												Order 5	49.5396	68	0.728523
	a. Computed using alpha = ,05																															a. Computed using alpha = ,05
	Tests of Between-Subjects Effects																															Tests of Between-Subjects Effects
	Measure:	Frequencyofresponse																														Measure:	Frequencyofresponse
	Transformed Variable:	Average																														Transformed Variable:	Average
	Source	Type III Sum of Squares	df	Mean Square	F	Sig.	Partial Eta Squared	Noncent. Parameter	Observed Powera																							Source	Type III Sum of Squares	df	Mean Square	F	Sig.	Partial Eta Squared	Noncent. Parameter	Observed Powera
	Intercept	4382.72	1	4382.72	691.314	2.37042e-37	0.910446	691.314	1																							Intercept	10443.3	1	10443.3	694.997	2.01036e-37	0.910878	694.997	1
	Surgery	1.41026	1	1.41026	0.222449	0.63869	0.00326064	0.222449	0.0751188																							Surgery	83.9858	1	83.9858	5.58923	0.0209338	0.0759517	5.58923	0.644579
	Treatment	5.16984	1	5.16984	0.815472	0.369695	0.0118501	0.815472	0.144575																							Treatment	93.3055	1	93.3055	6.20945	0.0151505	0.0836746	6.20945	0.690267
	Surgery * Treatment	3.32733	1	3.32733	0.524842	0.471269	0.00765915	0.524842	0.110184																							Surgery * Treatment	41.9476	1	41.9476	2.7916	0.0993563	0.0394341	2.7916	0.377391
	Error	431.099	68	6.33969																												Error	1021.79	68	15.0264
	a. Computed using alpha = ,05																															a. Computed using alpha = ,05
[truncated: 98 more columns]

## Sheet: Figure 3-figure supplement 2
	Figure 3-figure supplement 2
Raw data	Day -2																															Raw data	Day 7
		Frequency of response (out of ten applications)																																Frequency of response (out of ten applications)
		Sham-Vehicle							Endo - Vehicle							Endo - 7daysTHC							Endo-AcuteTHC											Sham-Vehicle							Endo - Vehicle							Endo - 7daysTHC
	von Frey filament	1.65	2.36	2.44	2.83	3.22	3.61	AUC	1.65	2.36	2.44	2.83	3.22	3.61	AUC	1.65	2.36	2.44	2.83	3.22	3.61	AUC	1.65	2.36	2.44	2.83	3.22	3.61	AUC				von Frey filament	1.65	2.36	2.44	2.83	3.22	3.61	AUC	1.65	2.36	2.44	2.83	3.22	3.61	AUC	1.65	2.36
		0	2	3	3	4	4	5.005	1	2	3	4	4	4	5.75	1	3	4	4	4	5	6.575	2	2	3	4	4	5	6.3					3	4	4	5	5	5	8.46	4	6	6	7	9	10	13.39	5	6
		1	1	2	3	3	4	4.34	1	1	2	3	4	4	4.73	2	1	2	3	3	3	4.5	1	2	4	3	4	4	5.595					3	5	4	4	4	5	8.075	5	4	5	6	6	6	10.38	4	6
		2	2	3	4	5	5	6.69	1	1	2	3	5	5	5.315	1	2	2	3	3	3	4.54	1	2	2	3	4	4	5.125					2	2	3	4	4	4	6.105	7	7	8	7	8	10	14.93	6	6
		1	2	3	4	4	4	5.75	2	2	3	3	4	4	5.715	1	2	4	4	4	5	6.18	1	2	2	2	3	3	4.15					4	4	4	5	5	5	8.815	4	6	7	7	7	7	12.26	6	6
		0	1	3	3	4	5	4.805	0	1	2	2	3	3	3.4	1	2	3	4	5	5	6.335	1	3	3	3	4	4	5.755					3	4	4	4	5	5	8.07	4	5	6	7	7	8	11.825	5	7
		1	3	3	4	3	4	5.755	0	2	3	4	4	5	5.59	2	4	4	4	4	5	7.325	1	1	2	4	3	4	4.73					2	3	4	4	5	4	7.125	6	6	8	9	10	10	15.74	5	5
		1	3	2	2	3	3	4.545	2	3	4	4	4	4	6.735	0	2	2	3	4	5	4.965	1	2	3	3	4	4	5.36					3	4	4	4	4	5	7.68	4	5	6	6	7	7	11.24	3	5
		1	2	2	2	3	3	4.15	2	3	3	4	4	4	6.5	1	1	1	3	3	3	3.91	1	3	3	3	4	5	5.95					2	3	4	4	5	5	7.32	4	5	5	6	7	7	11.005	3	4
		0	2	3	3	3	4	4.615	1	3	4	4	5	5	6.965	1	3	3	3	3	4	5.365	2	2	3	3	4	4	5.715					4	3	4	4	5	6	8.225	8	8	8	9	9	9	16.655	3	5
		1	2	3	4	5	5	6.335	2	2	2	3	3	3	4.895	1	3	4	4	5	6	7.16												2	2	5	4	6	5	7.55	3	5	5	7	8	9	11.82	6	6
		2	3	4	5	5	4	7.515	1	0	2	4	4	4	4.725																			2	5	4	5	5	5	8.5	4	6	6	6	6	6	11.05
		2	3	4	4	5	6	7.515	1	2	3	3	4	4	5.36																			2	3	5	5	6	6	8.53	4	4	6	6	5	6	9.87
	Mean	1	2.16667	2.91667	3.41667	3.91667	4.25	5.585	1.16667	1.83333	2.75	3.41667	4	4.08333	5.47333	1.1	2.3	2.9	3.5	3.8	4.4	5.6855	1.22222	2.11111	2.77778	3.11111	3.77778	4.11111	5.40889				Mean	2.66667	3.5	4.08333	4.33333	4.91667	5	7.87125	4.75	5.58333	6.33333	6.91667	7.41667	7.91667	12.5137	4.6	5.6
	SD	0.738549	0.717741	0.668558	0.900337	0.900337	0.866025	1.20098	0.717741	0.937437	0.753778	0.668558	0.603023	0.668558	0.99101	0.567646	0.948683	1.1005	0.527046	0.788811	1.07497	1.19311	0.440959	0.600925	0.666667	0.600925	0.440959	0.600925	0.657998				SD	0.778499	1	0.514929	0.492366	0.668558	0.603023	0.762347	1.48477	1.1645	1.1547	1.08362	1.44338	1.62135	2.19023	1.26491	0.843274
	SEM	0.213201	0.207194	0.192996	0.259905	0.259905	0.25	0.346694	0.207194	0.270615	0.217597	0.192996	0.174078	0.192996	0.28608	0.179505	0.3	0.34801	0.166667	0.249444	0.339935	0.377293	0.146986	0.200308	0.222222	0.200308	0.146986	0.200308	0.219333				SEM	0.224733	0.288675	0.148647	0.142134	0.192996	0.174078	0.220071	0.428617	0.336162	0.333333	0.312815	0.416667	0.468045	0.632266	0.4	0.266667
	CI	-0.477098	0.731186	1.57955	1.61599	2.11599	2.51795	3.18303	-0.268814	-0.0415404	1.24244	2.07955	2.79395	2.74622	3.49131	-0.0352924	0.402633	0.69899	2.44591	2.22238	2.25006	3.29929	0.340305	0.909261	1.44444	1.90926	2.89586	2.90926	4.09289				CI	1.10967	1.5	3.05348	3.3486	3.57955	3.79395	6.34656	1.78046	3.25433	4.02393	4.74942	4.52992	4.67396	8.13328	2.07018	3.91345
		2.4771	3.60215	4.25378	5.21734	5.71734	5.98205	7.98697	2.60215	3.70821	4.25756	4.75378	5.20605	5.42045	7.45535	2.23529	4.19737	5.10101	4.55409	5.37762	6.54994	8.07171	2.10414	3.31296	4.11111	4.31296	4.65969	5.31296	6.72488					4.22366	5.5	5.11319	5.31807	6.25378	6.20605	9.39594	7.71954	7.91233	8.64273	9.08392	10.3034	11.1594	16.8942	7.12982	7.28655
Statistics	Descriptive Statistics																															Statistics	Descriptive Statistics
	Daybasal																																Day7
	Subject	Filament	Surgery	Treatment	Count	Mean	Standard Deviation	Coefficient of Variation																									Subject	Filament	Surgery	Treatment	Count	Mean	Standard Deviation	Coefficient of Variation
	1.00	1.65	Sham	Vehicle	1	0	.	.%																									1.00	1.65	Sham	Vehicle	1	3	.	.%
		2.36	Sham	Vehicle	1	2	.	.%																										2.36	Sham	Vehicle	1	4	.	.%
		2.44	Sham	Vehicle	1	3	.	.%																										2.44	Sham	Vehicle	1	4	.	.%
		2.83	Sham	Vehicle	1	3	.	.%																										2.83	Sham	Vehicle	1	5	.	.%
		3.22	Sham	Vehicle	1	4	.	.%																										3.22	Sham	Vehicle	1	5	.	.%
		3.61	Sham	Vehicle	1	4	.	.%																										3.61	Sham	Vehicle	1	5	.	.%
		Total	Sham	Vehicle	6	2.66667	1.50555	0.564579																										Total	Sham	Vehicle	6	4.33333	0.816497	0.188422
	2.00	1.65	Sham	Vehicle	1	1	.	.%																									2.00	1.65	Sham	Vehicle	1	3	.	.%
		2.36	Sham	Vehicle	1	1	.	.%																										2.36	Sham	Vehicle	1	5	.	.%
		2.44	Sham	Vehicle	1	2	.	.%																										2.44	Sham	Vehicle	1	4	.	.%
		2.83	Sham	Vehicle	1	3	.	.%																										2.83	Sham	Vehicle	1	4	.	.%
		3.22	Sham	Vehicle	1	3	.	.%																										3.22	Sham	Vehicle	1	4	.	.%
		3.61	Sham	Vehicle	1	4	.	.%																										3.61	Sham	Vehicle	1	5	.	.%
		Total	Sham	Vehicle	6	2.33333	1.21106	0.519026																										Total	Sham	Vehicle	6	4.16667	0.752773	0.180665
	3.00	1.65	Sham	Vehicle	1	2	.	.%																									3.00	1.65	Sham	Vehicle	1	2	.	.%
		2.36	Sham	Vehicle	1	2	.	.%																										2.36	Sham	Vehicle	1	2	.	.%
		2.44	Sham	Vehicle	1	3	.	.%																										2.44	Sham	Vehicle	1	3	.	.%
		2.83	Sham	Vehicle	1	4	.	.%																										2.83	Sham	Vehicle	1	4	.	.%
		3.22	Sham	Vehicle	1	5	.	.%																										3.22	Sham	Vehicle	1	4	.	.%
		3.61	Sham	Vehicle	1	5	.	.%																										3.61	Sham	Vehicle	1	4	.	.%
		Total	Sham	Vehicle	6	3.5	1.3784	0.39383																										Total	Sham	Vehicle	6	3.16667	0.983192	0.310482
	4.00	1.65	Sham	Vehicle	1	1	.	.%																									4.00	1.65	Sham	Vehicle	1	4	.	.%
		2.36	Sham	Vehicle	1	2	.	.%																										2.36	Sham	Vehicle	1	4	.	.%
		2.44	Sham	Vehicle	1	3	.	.%																										2.44	Sham	Vehicle	1	4	.	.%
		2.83	Sham	Vehicle	1	4	.	.%																										2.83	Sham	Vehicle	1	5	.	.%
		3.22	Sham	Vehicle	1	4	.	.%																										3.22	Sham	Vehicle	1	5	.	.%
		3.61	Sham	Vehicle	1	4	.	.%																										3.61	Sham	Vehicle	1	5	.	.%
		Total	Sham	Vehicle	6	3	1.26491	0.421637																										Total	Sham	Vehicle	6	4.5	0.547723	0.121716
	5.00	1.65	Sham	Vehicle	1	0	.	.%																									5.00	1.65	Sham	Vehicle	1	3	.	.%
		2.36	Sham	Vehicle	1	1	.	.%																										2.36	Sham	Vehicle	1	4	.	.%
		2.44	Sham	Vehicle	1	3	.	.%																										2.44	Sham	Vehicle	1	4	.	.%
		2.83	Sham	Vehicle	1	3	.	.%																										2.83	Sham	Vehicle	1	4	.	.%
		3.22	Sham	Vehicle	1	4	.	.%																										3.22	Sham	Vehicle	1	5	.	.%
		3.61	Sham	Vehicle	1	5	.	.%																										3.61	Sham	Vehicle	1	5	.	.%
		Total	Sham	Vehicle	6	2.66667	1.8619	0.698212																										Total	Sham	Vehicle	6	4.16667	0.752773	0.180665
	6.00	1.65	Sham	Vehicle	1	1	.	.%																									6.00	1.65	Sham	Vehicle	1	2	.	.%
		2.36	Sham	Vehicle	1	3	.	.%																										2.36	Sham	Vehicle	1	3	.	.%
		2.44	Sham	Vehicle	1	3	.	.%																										2.44	Sham	Vehicle	1	4	.	.%
		2.83	Sham	Vehicle	1	4	.	.%																										2.83	Sham	Vehicle	1	4	.	.%
		3.22	Sham	Vehicle	1	3	.	.%																										3.22	Sham	Vehicle	1	5	.	.%
		3.61	Sham	Vehicle	1	4	.	.%																										3.61	Sham	Vehicle	1	4	.	.%
		Total	Sham	Vehicle	6	3	1.09545	0.365148																										Total	Sham	Vehicle	6	3.66667	1.0328	0.281672
	7.00	1.65	Sham	Vehicle	1	1	.	.%																									7.00	1.65	Sham	Vehicle	1	3	.	.%
		2.36	Sham	Vehicle	1	3	.	.%																										2.36	Sham	Vehicle	1	4	.	.%
		2.44	Sham	Vehicle	1	2	.	.%																										2.44	Sham	Vehicle	1	4	.	.%
		2.83	Sham	Vehicle	1	2	.	.%																										2.83	Sham	Vehicle	1	4	.	.%
		3.22	Sham	Vehicle	1	3	.	.%																										3.22	Sham	Vehicle	1	4	.	.%
		3.61	Sham	Vehicle	1	3	.	.%																										3.61	Sham	Vehicle	1	5	.	.%
		Total	Sham	Vehicle	6	2.33333	0.816497	0.349927																										Total	Sham	Vehicle	6	4	0.632456	0.158114
	8.00	1.65	Sham	Vehicle	1	1	.	.%																									8.00	1.65	Sham	Vehicle	1	2	.	.%
		2.36	Sham	Vehicle	1	2	.	.%																										2.36	Sham	Vehicle	1	3	.	.%
		2.44	Sham	Vehicle	1	2	.	.%																										2.44	Sham	Vehicle	1	4	.	.%
		2.83	Sham	Vehicle	1	2	.	.%																										2.83	Sham	Vehicle	1	4	.	.%
		3.22	Sham	Vehicle	1	3	.	.%																										3.22	Sham	Vehicle	1	5	.	.%
		3.61	Sham	Vehicle	1	3	.	.%																										3.61	Sham	Vehicle	1	5	.	.%
		Total	Sham	Vehicle	6	2.16667	0.752773	0.347434																										Total	Sham	Vehicle	6	3.83333	1.16905	0.304968
	9.00	1.65	Sham	Vehicle	1	0	.	.%																									9.00	1.65	Sham	Vehicle	1	4	.	.%
		2.36	Sham	Vehicle	1	2	.	.%																										2.36	Sham	Vehicle	1	3	.	.%
		2.44	Sham	Vehicle	1	3	.	.%																										2.44	Sham	Vehicle	1	4	.	.%
		2.83	Sham	Vehicle	1	3	.	.%																										2.83	Sham	Vehicle	1	4	.	.%
		3.22	Sham	Vehicle	1	3	.	.%																										3.22	Sham	Vehicle	1	5	.	.%
		3.61	Sham	Vehicle	1	4	.	.%																										3.61	Sham	Vehicle	1	6	.	.%
		Total	Sham	Vehicle	6	2.5	1.3784	0.551362																										Total	Sham	Vehicle	6	4.33333	1.0328	0.238337
	10.00	1.65	Sham	Vehicle	1	1	.	.%																									10.00	1.65	Sham	Vehicle	1	2	.	.%
		2.36	Sham	Vehicle	1	2	.	.%																										2.36	Sham	Vehicle	1	2	.	.%
		2.44	Sham	Vehicle	1	3	.	.%																										2.44	Sham	Vehicle	1	5	.	.%
		2.83	Sham	Vehicle	1	4	.	.%																										2.83	Sham	Vehicle	1	4	.	.%
		3.22	Sham	Vehicle	1	5	.	.%																										3.22	Sham	Vehicle	1	6	.	.%
		3.61	Sham	Vehicle	1	5	.	.%																										3.61	Sham	Vehicle	1	5	.	.%
		Total	Sham	Vehicle	6	3.33333	1.63299	0.489898																										Total	Sham	Vehicle	6	4	1.67332	0.41833
	11.00	1.65	Sham	Vehicle	1	2	.	.%																									11.00	1.65	Sham	Vehicle	1	2	.	.%
		2.36	Sham	Vehicle	1	3	.	.%																										2.36	Sham	Vehicle	1	5	.	.%
		2.44	Sham	Vehicle	1	4	.	.%																										2.44	Sham	Vehicle	1	4	.	.%
		2.83	Sham	Vehicle	1	5	.	.%																										2.83	Sham	Vehicle	1	5	.	.%
		3.22	Sham	Vehicle	1	5	.	.%																										3.22	Sham	Vehicle	1	5	.	.%
		3.61	Sham	Vehicle	1	4	.	.%																										3.61	Sham	Vehicle	1	5	.	.%
		Total	Sham	Vehicle	6	3.83333	1.16905	0.304968																										Total	Sham	Vehicle	6	4.33333	1.21106	0.279475
	12.00	1.65	Sham	Vehicle	1	2	.	.%																									12.00	1.65	Sham	Vehicle	1	2	.	.%
		2.36	Sham	Vehicle	1	3	.	.%																										2.36	Sham	Vehicle	1	3	.	.%
		2.44	Sham	Vehicle	1	4	.	.%																										2.44	Sham	Vehicle	1	5	.	.%
		2.83	Sham	Vehicle	1	4	.	.%																										2.83	Sham	Vehicle	1	5	.	.%
		3.22	Sham	Vehicle	1	5	.	.%																										3.22	Sham	Vehicle	1	6	.	.%
		3.61	Sham	Vehicle	1	6	.	.%																										3.61	Sham	Vehicle	1	6	.	.%
		Total	Sham	Vehicle	6	4	1.41421	0.353553																										Total	Sham	Vehicle	6	4.5	1.64317	0.365148
	13.00	1.65	Endo	Vehicle	1	1	.	.%																									13.00	1.65	Endo	Vehicle	1	4	.	.%
		2.36	Endo	Vehicle	1	2	.	.%																										2.36	Endo	Vehicle	1	6	.	.%
		2.44	Endo	Vehicle	1	3	.	.%																										2.44	Endo	Vehicle	1	6	.	.%
		2.83	Endo	Vehicle	1	4	.	.%																										2.83	Endo	Vehicle	1	7	.	.%
		3.22	Endo	Vehicle	1	4	.	.%																										3.22	Endo	Vehicle	1	9	.	.%
		3.61	Endo	Vehicle	1	4	.	.%																										3.61	Endo	Vehicle	1	10	.	.%
		Total	Endo	Vehicle	6	3	1.26491	0.421637																										Total	Endo	Vehicle	6	7	2.19089	0.312984
	14.00	1.65	Endo	Vehicle	1	1	.	.%																									14.00	1.65	Endo	Vehicle	1	5	.	.%
		2.36	Endo	Vehicle	1	1	.	.%																										2.36	Endo	Vehicle	1	4	.	.%
		2.44	Endo	Vehicle	1	2	.	.%																										2.44	Endo	Vehicle	1	5	.	.%
		2.83	Endo	Vehicle	1	3	.	.%																										2.83	Endo	Vehicle	1	6	.	.%
		3.22	Endo	Vehicle	1	4	.	.%																										3.22	Endo	Vehicle	1	6	.	.%
		3.61	Endo	Vehicle	1	4	.	.%																										3.61	Endo	Vehicle	1	6	.	.%
		Total	Endo	Vehicle	6	2.5	1.3784	0.551362																										Total	Endo	Vehicle	6	5.33333	0.816497	0.153093
	15.00	1.65	Endo	Vehicle	1	1	.	.%																									15.00	1.65	Endo	Vehicle	1	7	.	.%
		2.36	Endo	Vehicle	1	1	.	.%																										2.36	Endo	Vehicle	1	7	.	.%
		2.44	Endo	Vehicle	1	2	.	.%																										2.44	Endo	Vehicle	1	8	.	.%
		2.83	Endo	Vehicle	1	3	.	.%																										2.83	Endo	Vehicle	1	7	.	.%
		3.22	Endo	Vehicle	1	5	.	.%																										3.22	Endo	Vehicle	1	8	.	.%
		3.61	Endo	Vehicle	1	5	.	.%																										3.61	Endo	Vehicle	1	10	.	.%
		Total	Endo	Vehicle	6	2.83333	1.83485	0.647593																										Total	Endo	Vehicle	6	7.83333	1.16905	0.14924
	16.00	1.65	Endo	Vehicle	1	2	.	.%																									16.00	1.65	Endo	Vehicle	1	4	.	.%
		2.36	Endo	Vehicle	1	2	.	.%																										2.36	Endo	Vehicle	1	6	.	.%
		2.44	Endo	Vehicle	1	3	.	.%																										2.44	Endo	Vehicle	1	7	.	.%
		2.83	Endo	Vehicle	1	3	.	.%																										2.83	Endo	Vehicle	1	7	.	.%
		3.22	Endo	Vehicle	1	4	.	.%																										3.22	Endo	Vehicle	1	7	.	.%
		3.61	Endo	Vehicle	1	4	.	.%																										3.61	Endo	Vehicle	1	7	.	.%
		Total	Endo	Vehicle	6	3	0.894427	0.298142																										Total	Endo	Vehicle	6	6.33333	1.21106	0.19122
	17.00	1.65	Endo	Vehicle	1	0	.	.%																									17.00	1.65	Endo	Vehicle	1	4	.	.%
		2.36	Endo	Vehicle	1	1	.	.%																										2.36	Endo	Vehicle	1	5	.	.%
		2.44	Endo	Vehicle	1	2	.	.%																										2.44	Endo	Vehicle	1	6	.	.%
		2.83	Endo	Vehicle	1	2	.	.%																										2.83	Endo	Vehicle	1	7	.	.%
		3.22	Endo	Vehicle	1	3	.	.%																										3.22	Endo	Vehicle	1	7	.	.%
		3.61	Endo	Vehicle	1	3	.	.%																										3.61	Endo	Vehicle	1	8	.	.%
		Total	Endo	Vehicle	6	1.83333	1.16905	0.637661																										Total	Endo	Vehicle	6	6.16667	1.47196	0.238696
	18.00	1.65	Endo	Vehicle	1	0	.	.%																									18.00	1.65	Endo	Vehicle	1	6	.	.%
		2.36	Endo	Vehicle	1	2	.	.%																										2.36	Endo	Vehicle	1	6	.	.%
		2.44	Endo	Vehicle	1	3	.	.%																										2.44	Endo	Vehicle	1	8	.	.%
		2.83	Endo	Vehicle	1	4	.	.%																										2.83	Endo	Vehicle	1	9	.	.%
		3.22	Endo	Vehicle	1	4	.	.%																										3.22	Endo	Vehicle	1	10	.	.%
		3.61	Endo	Vehicle	1	5	.	.%																										3.61	Endo	Vehicle	1	10	.	.%
		Total	Endo	Vehicle	6	3	1.78885	0.596285																										Total	Endo	Vehicle	6	8.16667	1.83485	0.224675
	19.00	1.65	Endo	Vehicle	1	2	.	.%																									19.00	1.65	Endo	Vehicle	1	4	.	.%
		2.36	Endo	Vehicle	1	3	.	.%																										2.36	Endo	Vehicle	1	5	.	.%
		2.44	Endo	Vehicle	1	4	.	.%																										2.44	Endo	Vehicle	1	6	.	.%
		2.83	Endo	Vehicle	1	4	.	.%																										2.83	Endo	Vehicle	1	6	.	.%
		3.22	Endo	Vehicle	1	4	.	.%																										3.22	Endo	Vehicle	1	7	.	.%
		3.61	Endo	Vehicle	1	4	.	.%																										3.61	Endo	Vehicle	1	7	.	.%
		Total	Endo	Vehicle	6	3.5	0.83666	0.239046																										Total	Endo	Vehicle	6	5.83333	1.16905	0.200408
	20.00	1.65	Endo	Vehicle	1	2	.	.%																									20.00	1.65	Endo	Vehicle	1	4	.	.%
		2.36	Endo	Vehicle	1	3	.	.%																										2.36	Endo	Vehicle	1	5	.	.%
		2.44	Endo	Vehicle	1	3	.	.%																										2.44	Endo	Vehicle	1	5	.	.%
		2.83	Endo	Vehicle	1	4	.	.%																										2.83	Endo	Vehicle	1	6	.	.%
		3.22	Endo	Vehicle	1	4	.	.%																										3.22	Endo	Vehicle	1	7	.	.%
		3.61	Endo	Vehicle	1	4	.	.%																										3.61	Endo	Vehicle	1	7	.	.%
		Total	Endo	Vehicle	6	3.33333	0.816497	0.244949																										Total	Endo	Vehicle	6	5.66667	1.21106	0.213716
	21.00	1.65	Endo	Vehicle	1	1	.	.%																									21.00	1.65	Endo	Vehicle	1	8	.	.%
		2.36	Endo	Vehicle	1	3	.	.%																										2.36	Endo	Vehicle	1	8	.	.%
		2.44	Endo	Vehicle	1	4	.	.%																										2.44	Endo	Vehicle	1	8	.	.%
		2.83	Endo	Vehicle	1	4	.	.%																										2.83	Endo	Vehicle	1	9	.	.%
		3.22	Endo	Vehicle	1	5	.	.%																										3.22	Endo	Vehicle	1	9	.	.%
		3.61	Endo	Vehicle	1	5	.	.%																										3.61	Endo	Vehicle	1	9	.	.%
		Total	Endo	Vehicle	6	3.66667	1.50555	0.410603																										Total	Endo	Vehicle	6	8.5	0.547723	0.0644379
	22.00	1.65	Endo	Vehicle	1	2	.	.%																									22.00	1.65	Endo	Vehicle	1	3	.	.%
		2.36	Endo	Vehicle	1	2	.	.%																										2.36	Endo	Vehicle	1	5	.	.%
		2.44	Endo	Vehicle	1	2	.	.%																										2.44	Endo	Vehicle	1	5	.	.%
		2.83	Endo	Vehicle	1	3	.	.%																										2.83	Endo	Vehicle	1	7	.	.%
		3.22	Endo	Vehicle	1	3	.	.%																										3.22	Endo	Vehicle	1	8	.	.%
		3.61	Endo	Vehicle	1	3	.	.%																										3.61	Endo	Vehicle	1	9	.	.%
		Total	Endo	Vehicle	6	2.5	0.547723	0.219089																										Total	Endo	Vehicle	6	6.16667	2.2286	0.361395
	23.00	1.65	Endo	Vehicle	1	1	.	.%																									23.00	1.65	Endo	Vehicle	1	4	.	.%
		2.36	Endo	Vehicle	1	0	.	.%																										2.36	Endo	Vehicle	1	6	.	.%
		2.44	Endo	Vehicle	1	2	.	.%																										2.44	Endo	Vehicle	1	6	.	.%
		2.83	Endo	Vehicle	1	4	.	.%																										2.83	Endo	Vehicle	1	6	.	.%
		3.22	Endo	Vehicle	1	4	.	.%																										3.22	Endo	Vehicle	1	6	.	.%
		3.61	Endo	Vehicle	1	4	.	.%																										3.61	Endo	Vehicle	1	6	.	.%
		Total	Endo	Vehicle	6	2.5	1.76068	0.704273																										Total	Endo	Vehicle	6	5.66667	0.816497	0.144088
	24.00	1.65	Endo	Vehicle	1	1	.	.%																									24.00	1.65	Endo	Vehicle	1	4	.	.%
		2.36	Endo	Vehicle	1	2	.	.%																										2.36	Endo	Vehicle	1	4	.	.%
		2.44	Endo	Vehicle	1	3	.	.%																										2.44	Endo	Vehicle	1	6	.	.%
		2.83	Endo	Vehicle	1	3	.	.%																										2.83	Endo	Vehicle	1	6	.	.%
		3.22	Endo	Vehicle	1	4	.	.%																										3.22	Endo	Vehicle	1	5	.	.%
		3.61	Endo	Vehicle	1	4	.	.%																										3.61	Endo	Vehicle	1	6	.	.%
		Total	Endo	Vehicle	6	2.83333	1.16905	0.412604																										Total	Endo	Vehicle	6	5.16667	0.983192	0.190295
	25.00	1.65	Endo	7daysTHC	1	1	.	.%																									25.00	1.65	Endo	7daysTHC	1	5	.	.%
		2.36	Endo	7daysTHC	1	3	.	.%																										2.36	Endo	7daysTHC	1	6	.	.%
		2.44	Endo	7daysTHC	1	4	.	.%																										2.44	Endo	7daysTHC	1	6	.	.%
		2.83	Endo	7daysTHC	1	4	.	.%																										2.83	Endo	7daysTHC	1	7	.	.%
		3.22	Endo	7daysTHC	1	4	.	.%																										3.22	Endo	7daysTHC	1	7	.	.%
		3.61	Endo	7daysTHC	1	5	.	.%																										3.61	Endo	7daysTHC	1	7	.	.%
		Total	Endo	7daysTHC	6	3.5	1.3784	0.39383																										Total	Endo	7daysTHC	6	6.33333	0.816497	0.128921
	26.00	1.65	Endo	7daysTHC	1	2	.	.%																									26.00	1.65	Endo	7daysTHC	1	4	.	.%
		2.36	Endo	7daysTHC	1	1	.	.%																										2.36	Endo	7daysTHC	1	6	.	.%
		2.44	Endo	7daysTHC	1	2	.	.%																										2.44	Endo	7daysTHC	1	5	.	.%
		2.83	Endo	7daysTHC	1	3	.	.%																										2.83	Endo	7daysTHC	1	6	.	.%
		3.22	Endo	7daysTHC	1	3	.	.%																										3.22	Endo	7daysTHC	1	6	.	.%
		3.61	Endo	7daysTHC	1	3	.	.%																										3.61	Endo	7daysTHC	1	7	.	.%
		Total	Endo	7daysTHC	6	2.33333	0.816497	0.349927																										Total	Endo	7daysTHC	6	5.66667	1.0328	0.182258
	27.00	1.65	Endo	7daysTHC	1	1	.	.%																									27.00	1.65	Endo	7daysTHC	1	6	.	.%
		2.36	Endo	7daysTHC	1	2	.	.%																										2.36	Endo	7daysTHC	1	6	.	.%
		2.44	Endo	7daysTHC	1	2	.	.%																										2.44	Endo	7daysTHC	1	6	.	.%
		2.83	Endo	7daysTHC	1	3	.	.%																										2.83	Endo	7daysTHC	1	7	.	.%
		3.22	Endo	7daysTHC	1	3	.	.%																										3.22	Endo	7daysTHC	1	7	.	.%
		3.61	Endo	7daysTHC	1	3	.	.%																										3.61	Endo	7daysTHC	1	8	.	.%
		Total	Endo	7daysTHC	6	2.33333	0.816497	0.349927																										Total	Endo	7daysTHC	6	6.66667	0.816497	0.122474
	28.00	1.65	Endo	7daysTHC	1	1	.	.%																									28.00	1.65	Endo	7daysTHC	1	6	.	.%
		2.36	Endo	7daysTHC	1	2	.	.%																										2.36	Endo	7daysTHC	1	6	.	.%
		2.44	Endo	7daysTHC	1	4	.	.%																										2.44	Endo	7daysTHC	1	6	.	.%
		2.83	Endo	7daysTHC	1	4	.	.%																										2.83	Endo	7daysTHC	1	6	.	.%
		3.22	Endo	7daysTHC	1	4	.	.%																										3.22	Endo	7daysTHC	1	6	.	.%
		3.61	Endo	7daysTHC	1	5	.	.%																										3.61	Endo	7daysTHC	1	8	.	.%
		Total	Endo	7daysTHC	6	3.33333	1.50555	0.451664																										Total	Endo	7daysTHC	6	6.33333	0.816497	0.128921
	29.00	1.65	Endo	7daysTHC	1	1	.	.%																									29.00	1.65	Endo	7daysTHC	1	5	.	.%
		2.36	Endo	7daysTHC	1	2	.	.%																										2.36	Endo	7daysTHC	1	7	.	.%
		2.44	Endo	7daysTHC	1	3	.	.%																										2.44	Endo	7daysTHC	1	7	.	.%
		2.83	Endo	7daysTHC	1	4	.	.%																										2.83	Endo	7daysTHC	1	9	.	.%
		3.22	Endo	7daysTHC	1	5	.	.%																										3.22	Endo	7daysTHC	1	9	.	.%
		3.61	Endo	7daysTHC	1	5	.	.%																										3.61	Endo	7daysTHC	1	10	.	.%
		Total	Endo	7daysTHC	6	3.33333	1.63299	0.489898																										Total	Endo	7daysTHC	6	7.83333	1.83485	0.234236
	30.00	1.65	Endo	7daysTHC	1	2	.	.%																									30.00	1.65	Endo	7daysTHC	1	5	.	.%
		2.36	Endo	7daysTHC	1	4	.	.%																										2.36	Endo	7daysTHC	1	5	.	.%
		2.44	Endo	7daysTHC	1	4	.	.%																										2.44	Endo	7daysTHC	1	7	.	.%
		2.83	Endo	7daysTHC	1	4	.	.%																										2.83	Endo	7daysTHC	1	7	.	.%
		3.22	Endo	7daysTHC	1	4	.	.%																										3.22	Endo	7daysTHC	1	8	.	.%
		3.61	Endo	7daysTHC	1	5	.	.%																										3.61	Endo	7daysTHC	1	8	.	.%
		Total	Endo	7daysTHC	6	3.83333	0.983192	0.256485																										Total	Endo	7daysTHC	6	6.66667	1.36626	0.204939
	31.00	1.65	Endo	7daysTHC	1	0	.	.%																									31.00	1.65	Endo	7daysTHC	1	3	.	.%
		2.36	Endo	7daysTHC	1	2	.	.%																										2.36	Endo	7daysTHC	1	5	.	.%
		2.44	Endo	7daysTHC	1	2	.	.%																										2.44	Endo	7daysTHC	1	6	.	.%
		2.83	Endo	7daysTHC	1	3	.	.%																										2.83	Endo	7daysTHC	1	5	.	.%
		3.22	Endo	7daysTHC	1	4	.	.%																										3.22	Endo	7daysTHC	1	6	.	.%
		3.61	Endo	7daysTHC	1	5	.	.%																										3.61	Endo	7daysTHC	1	7	.	.%
		Total	Endo	7daysTHC	6	2.66667	1.75119	0.656696																										Total	Endo	7daysTHC	6	5.33333	1.36626	0.256174
	32.00	1.65	Endo	7daysTHC	1	1	.	.%																									32.00	1.65	Endo	7daysTHC	1	3	.	.%
		2.36	Endo	7daysTHC	1	1	.	.%																										2.36	Endo	7daysTHC	1	4	.	.%
		2.44	Endo	7daysTHC	1	1	.	.%																										2.44	Endo	7daysTHC	1	6	.	.%
		2.83	Endo	7daysTHC	1	3	.	.%																										2.83	Endo	7daysTHC	1	6	.	.%
		3.22	Endo	7daysTHC	1	3	.	.%																										3.22	Endo	7daysTHC	1	6	.	.%
		3.61	Endo	7daysTHC	1	3	.	.%																										3.61	Endo	7daysTHC	1	6	.	.%
		Total	Endo	7daysTHC	6	2	1.09545	0.547723																										Total	Endo	7daysTHC	6	5.16667	1.32916	0.257257
	33.00	1.65	Endo	7daysTHC	1	1	.	.%																									33.00	1.65	Endo	7daysTHC	1	3	.	.%
		2.36	Endo	7daysTHC	1	3	.	.%																										2.36	Endo	7daysTHC	1	5	.	.%
		2.44	Endo	7daysTHC	1	3	.	.%																										2.44	Endo	7daysTHC	1	5	.	.%
		2.83	Endo	7daysTHC	1	3	.	.%																										2.83	Endo	7daysTHC	1	6	.	.%
		3.22	Endo	7daysTHC	1	3	.	.%																										3.22	Endo	7daysTHC	1	6	.	.%
		3.61	Endo	7daysTHC	1	4	.	.%																										3.61	Endo	7daysTHC	1	6	.	.%
		Total	Endo	7daysTHC	6	2.83333	0.983192	0.347009																										Total	Endo	7daysTHC	6	5.16667	1.16905	0.226267
	34.00	1.65	Endo	7daysTHC	1	1	.	.%																									34.00	1.65	Endo	7daysTHC	1	6	.	.%
		2.36	Endo	7daysTHC	1	3	.	.%																										2.36	Endo	7daysTHC	1	6	.	.%
		2.44	Endo	7daysTHC	1	4	.	.%																										2.44	Endo	7daysTHC	1	8	.	.%
		2.83	Endo	7daysTHC	1	4	.	.%																										2.83	Endo	7daysTHC	1	7	.	.%
		3.22	Endo	7daysTHC	1	5	.	.%																										3.22	Endo	7daysTHC	1	8	.	.%
		3.61	Endo	7daysTHC	1	6	.	.%																										3.61	Endo	7daysTHC	1	9	.	.%
		Total	Endo	7daysTHC	6	3.83333	1.7224	0.449322																										Total	Endo	7daysTHC	6	7.33333	1.21106	0.165145
	35.00	1.65	Endo	AcuteTHC	1	2	.	.%																									35.00	1.65	Endo	AcuteTHC	1	6	.	.%
		2.36	Endo	AcuteTHC	1	2	.	.%																										2.36	Endo	AcuteTHC	1	6	.	.%
		2.44	Endo	AcuteTHC	1	3	.	.%																										2.44	Endo	AcuteTHC	1	7	.	.%
		2.83	Endo	AcuteTHC	1	4	.	.%																										2.83	Endo	AcuteTHC	1	7	.	.%
		3.22	Endo	AcuteTHC	1	4	.	.%																										3.22	Endo	AcuteTHC	1	8	.	.%
		3.61	Endo	AcuteTHC	1	5	.	.%																										3.61	Endo	AcuteTHC	1	8	.	.%
		Total	Endo	AcuteTHC	6	3.33333	1.21106	0.363318																										Total	Endo	AcuteTHC	6	7	0.894427	0.127775
	36.00	1.65	Endo	AcuteTHC	1	1	.	.%																									36.00	1.65	Endo	AcuteTHC	1	4	.	.%
		2.36	Endo	AcuteTHC	1	2	.	.%																										2.36	Endo	AcuteTHC	1	4	.	.%
		2.44	Endo	AcuteTHC	1	4	.	.%																										2.44	Endo	AcuteTHC	1	4	.	.%
		2.83	Endo	AcuteTHC	1	3	.	.%																										2.83	Endo	AcuteTHC	1	7	.	.%
		3.22	Endo	AcuteTHC	1	4	.	.%																										3.22	Endo	AcuteTHC	1	7	.	.%
		3.61	Endo	AcuteTHC	1	4	.	.%																										3.61	Endo	AcuteTHC	1	7	.	.%
		Total	Endo	AcuteTHC	6	3	1.26491	0.421637																										Total	Endo	AcuteTHC	6	5.5	1.64317	0.298758
	37.00	1.65	Endo	AcuteTHC	1	1	.	.%																									37.00	1.65	Endo	AcuteTHC	1	4	.	.%
		2.36	Endo	AcuteTHC	1	2	.	.%																										2.36	Endo	AcuteTHC	1	3	.	.%
		2.44	Endo	AcuteTHC	1	2	.	.%																										2.44	Endo	AcuteTHC	1	5	.	.%
		2.83	Endo	AcuteTHC	1	3	.	.%																										2.83	Endo	AcuteTHC	1	6	.	.%
		3.22	Endo	AcuteTHC	1	4	.	.%																										3.22	Endo	AcuteTHC	1	6	.	.%
		3.61	Endo	AcuteTHC	1	4	.	.%																										3.61	Endo	AcuteTHC	1	7	.	.%
		Total	Endo	AcuteTHC	6	2.66667	1.21106	0.454148																										Total	Endo	AcuteTHC	6	5.16667	1.47196	0.284896
	38.00	1.65	Endo	AcuteTHC	1	1	.	.%																									38.00	1.65	Endo	AcuteTHC	1	4	.	.%
		2.36	Endo	AcuteTHC	1	2	.	.%																										2.36	Endo	AcuteTHC	1	4	.	.%
		2.44	Endo	AcuteTHC	1	2	.	.%																										2.44	Endo	AcuteTHC	1	6	.	.%
		2.83	Endo	AcuteTHC	1	2	.	.%																										2.83	Endo	AcuteTHC	1	6	.	.%
		3.22	Endo	AcuteTHC	1	3	.	.%																										3.22	Endo	AcuteTHC	1	7	.	.%
		3.61	Endo	AcuteTHC	1	3	.	.%																										3.61	Endo	AcuteTHC	1	8	.	.%
		Total	Endo	AcuteTHC	6	2.16667	0.752773	0.347434																										Total	Endo	AcuteTHC	6	5.83333	1.60208	0.274643
	39.00	1.65	Endo	AcuteTHC	1	1	.	.%																									39.00	1.65	Endo	AcuteTHC	1	3	.	.%
		2.36	Endo	AcuteTHC	1	3	.	.%																										2.36	Endo	AcuteTHC	1	5	.	.%
		2.44	Endo	AcuteTHC	1	3	.	.%																										2.44	Endo	AcuteTHC	1	6	.	.%
		2.83	Endo	AcuteTHC	1	3	.	.%																										2.83	Endo	AcuteTHC	1	6	.	.%
		3.22	Endo	AcuteTHC	1	4	.	.%																										3.22	Endo	AcuteTHC	1	8	.	.%
		3.61	Endo	AcuteTHC	1	4	.	.%																										3.61	Endo	AcuteTHC	1	8	.	.%
		Total	Endo	AcuteTHC	6	3	1.09545	0.365148																										Total	Endo	AcuteTHC	6	6	1.89737	0.316228
	40.00	1.65	Endo	AcuteTHC	1	1	.	.%																									40.00	1.65	Endo	AcuteTHC	1	4	.	.%
		2.36	Endo	AcuteTHC	1	1	.	.%																										2.36	Endo	AcuteTHC	1	4	.	.%
		2.44	Endo	AcuteTHC	1	2	.	.%																										2.44	Endo	AcuteTHC	1	5	.	.%
		2.83	Endo	AcuteTHC	1	4	.	.%																										2.83	Endo	AcuteTHC	1	6	.	.%
		3.22	Endo	AcuteTHC	1	3	.	.%																										3.22	Endo	AcuteTHC	1	7	.	.%
		3.61	Endo	AcuteTHC	1	4	.	.%																										3.61	Endo	AcuteTHC	1	9	.	.%
		Total	Endo	AcuteTHC	6	2.5	1.3784	0.551362																										Total	Endo	AcuteTHC	6	5.83333	1.94079	0.332707
	41.00	1.65	Endo	AcuteTHC	1	1	.	.%																									41.00	1.65	Endo	AcuteTHC	1	3	.	.%
		2.36	Endo	AcuteTHC	1	2	.	.%																										2.36	Endo	AcuteTHC	1	4	.	.%
		2.44	Endo	AcuteTHC	1	3	.	.%																										2.44	Endo	AcuteTHC	1	5	.	.%
		2.83	Endo	AcuteTHC	1	3	.	.%																										2.83	Endo	AcuteTHC	1	5	.	.%
		3.22	Endo	AcuteTHC	1	4	.	.%																										3.22	Endo	AcuteTHC	1	6	.	.%
		3.61	Endo	AcuteTHC	1	4	.	.%																										3.61	Endo	AcuteTHC	1	6	.	.%
		Total	Endo	AcuteTHC	6	2.83333	1.16905	0.412604																										Total	Endo	AcuteTHC	6	4.83333	1.16905	0.241871
	42.00	1.65	Endo	AcuteTHC	1	1	.	.%																									42.00	1.65	Endo	AcuteTHC	1	3	.	.%
		2.36	Endo	AcuteTHC	1	3	.	.%																										2.36	Endo	AcuteTHC	1	5	.	.%
		2.44	Endo	AcuteTHC	1	3	.	.%																										2.44	Endo	AcuteTHC	1	4	.	.%
		2.83	Endo	AcuteTHC	1	3	.	.%																										2.83	Endo	AcuteTHC	1	5	.	.%
		3.22	Endo	AcuteTHC	1	4	.	.%																										3.22	Endo	AcuteTHC	1	6	.	.%
		3.61	Endo	AcuteTHC	1	5	.	.%																										3.61	Endo	AcuteTHC	1	7	.	.%
		Total	Endo	AcuteTHC	6	3.16667	1.32916	0.419735																										Total	Endo	AcuteTHC	6	5	1.41421	0.282843
	43.00	1.65	Endo	AcuteTHC	1	2	.	.%																									43.00	1.65	Endo	AcuteTHC	1	4	.	.%
		2.36	Endo	AcuteTHC	1	2	.	.%																										2.36	Endo	AcuteTHC	1	5	.	.%
		2.44	Endo	AcuteTHC	1	3	.	.%																										2.44	Endo	AcuteTHC	1	7	.	.%
		2.83	Endo	AcuteTHC	1	3	.	.%																										2.83	Endo	AcuteTHC	1	6	.	.%
		3.22	Endo	AcuteTHC	1	4	.	.%																										3.22	Endo	AcuteTHC	1	7	.	.%
		3.61	Endo	AcuteTHC	1	4	.	.%																										3.61	Endo	AcuteTHC	1	7	.	.%
		Total	Endo	AcuteTHC	6	3	0.894427	0.298142																										Total	Endo	AcuteTHC	6	6	1.26491	0.210819
	Total	1.65	Endo	7daysTHC	10	1.1	0.567646	0.516042																									Total	1.65	Endo	7daysTHC	10	4.6	1.26491	0.274981
				AcuteTHC	9	1.22222	0.440959	0.360784																												AcuteTHC	9	3.88889	0.927961	0.238618
				Vehicle	12	1.16667	0.717741	0.615206																												Vehicle	12	4.75	1.48477	0.312583
				Total	31	1.16129	0.582911	0.501951																												Total	31	4.45161	1.28682	0.289069
			Sham	Vehicle	12	1	0.738549	0.738549																											Sham	Vehicle	12	2.66667	0.778499	0.291937
			Total	Vehicle	24	1.08333	0.717282	0.662106																											Total	Vehicle	24	3.70833	1.57367	0.424361
				Total	43	1.11628	0.625235	0.560107																												Total	43	3.95349	1.41343	0.357515
		2.36	Endo	7daysTHC	10	2.3	0.948683	0.412471																										2.36	Endo	7daysTHC	10	5.6	0.843274	0.150585
				AcuteTHC	9	2.11111	0.600925	0.284649																												AcuteTHC	9	4.44444	0.881917	0.198431
				Vehicle	12	1.83333	0.937437	0.511329																												Vehicle	12	5.58333	1.1645	0.208567
				Total	31	2.06452	0.853834	0.413576																												Total	31	5.25806	1.09446	0.208149
			Sham	Vehicle	12	2.16667	0.717741	0.331265																											Sham	Vehicle	12	3.5	1	0.285714
			Total	Vehicle	24	2	0.834058	0.417029																											Total	Vehicle	24	4.54167	1.50302	0.330939
				Total	43	2.09302	0.811053	0.387503																												Total	43	4.76744	1.32444	0.27781
		2.44	Endo	7daysTHC	10	2.9	1.1005	0.379484																										2.44	Endo	7daysTHC	10	6.2	0.918937	0.148216
				AcuteTHC	9	2.77778	0.666667	0.24																												AcuteTHC	9	5.44444	1.13039	0.207622
				Vehicle	12	2.75	0.753778	0.274101																												Vehicle	12	6.33333	1.1547	0.182321
				Total	31	2.80645	0.833441	0.296973																												Total	31	6.03226	1.11007	0.184022
			Sham	Vehicle	12	2.91667	0.668558	0.22922																											Sham	Vehicle	12	4.08333	0.514929	0.126105
			Total	Vehicle	24	2.83333	0.701964	0.247752																											Total	Vehicle	24	5.20833	1.444	0.277249
				Total	43	2.83721	0.784682	0.276568																												Total	43	5.48837	1.31606	0.23979
		2.83	Endo	7daysTHC	10	3.5	0.527046	0.150585																										2.83	Endo	7daysTHC	10	6.6	1.07497	0.162874
				AcuteTHC	9	3.11111	0.600925	0.193155																												AcuteTHC	9	6	0.707107	0.117851
				Vehicle	12	3.41667	0.668558	0.195675																												Vehicle	12	6.91667	1.08362	0.156669
				Total	31	3.35484	0.608188	0.181287																												Total	31	6.54839	1.02758	0.156921
			Sham	Vehicle	12	3.41667	0.900337	0.263513																											Sham	Vehicle	12	4.33333	0.492366	0.113623
			Total	Vehicle	24	3.41667	0.775532	0.226985																											Total	Vehicle	24	5.625	1.55515	0.27647
				Total	43	3.37209	0.690867	0.204878																												Total	43	5.93023	1.35216	0.228012
		3.22	Endo	7daysTHC	10	3.8	0.788811	0.207582																										3.22	Endo	7daysTHC	10	6.9	1.1005	0.159493
				AcuteTHC	9	3.77778	0.440959	0.116724																												AcuteTHC	9	6.88889	0.781736	0.113478
				Vehicle	12	4	0.603023	0.150756																												Vehicle	12	7.41667	1.44338	0.194612
				Total	31	3.87097	0.618705	0.159832																												Total	31	7.09677	1.1649	0.164145
			Sham	Vehicle	12	3.91667	0.900337	0.229873																											Sham	Vehicle	12	4.91667	0.668558	0.135978
			Total	Vehicle	24	3.95833	0.750604	0.189626																											Total	Vehicle	24	6.16667	1.6854	0.273308
				Total	43	3.88372	0.69725	0.179531																												Total	43	6.48837	1.43713	0.221493
		3.61	Endo	7daysTHC	10	4.4	1.07497	0.244311																										3.61	Endo	7daysTHC	10	7.6	1.26491	0.166436
				AcuteTHC	9	4.11111	0.600925	0.146171																												AcuteTHC	9	7.44444	0.881917	0.118466
				Vehicle	12	4.08333	0.668558	0.163728																												Vehicle	12	7.91667	1.62135	0.204803
				Total	31	4.19355	0.792437	0.188966																												Total	31	7.67742	1.30095	0.169452
			Sham	Vehicle	12	4.25	0.866025	0.203771																											Sham	Vehicle	12	5	0.603023	0.120605
			Total	Vehicle	24	4.16667	0.761387	0.182733																											Total	Vehicle	24	6.45833	1.91059	0.295834
				Total	43	4.2093	0.803508	0.190889																												Total	43	6.93023	1.66755	0.24062
		Total	Endo	7daysTHC	60	3	1.36543	0.455144																										Total	Endo	7daysTHC	60	6.25	1.42168	0.227469
				AcuteTHC	54	2.85185	1.12279	0.393706																												AcuteTHC	54	5.68519	1.52741	0.268665
				Vehicle	72	2.875	1.29938	0.451957																												Vehicle	72	6.48611	1.68668	0.260044
				Total	186	2.9086	1.268	0.435947																												Total	186	6.17742	1.58565	0.256685
			Sham	Vehicle	72	2.94444	1.35198	0.459164																											Sham	Vehicle	72	4.08333	1.05817	0.259143
			Total	Vehicle	144	2.90972	1.32176	0.454255																											Total	Vehicle	144	5.28472	1.84983	0.350033
				Total	258	2.9186	1.28942	0.441794																												Total	258	5.59302	1.73347	0.309935
	Totals that are aggregated over either a single category of a variable or a split file variable are omitted.																																Totals that are aggregated over either a single category of a variable or a split file variable are omitted.
	Model Dimensiona																																Model Dimensiona
			Number of Levels	Covariance Structure	Number of Parameters	Subject Variables	Number of Subjects																												Number of Levels	Covariance Structure	Number of Parameters	Subject Variables	Number of Subjects
	Fixed Effects	Intercept	1		1																												Fixed Effects	Intercept	1		1
		Surgery	2		1																													Surgery	2		1
		Treatment	3		2																													Treatment	3		2
		Filament	6		5																													Filament	6		5
		Surgery * Treatment	4		0																													Surgery * Treatment	4		0
		Surgery * Filament	12		5																													Surgery * Filament	12		5
		Treatment * Filament	18		10																													Treatment * Filament	18		10
		Surgery * Treatment * Filament	24		0																													Surgery * Treatment * Filament	24		0
	Repeated Effects	Filament	6	Diagonal	6	Subject	43																										Repeated Effects	Filament	6	Diagonal	6	Subject	43
	Total		76		30																												Total		76		30
	a. Dependent Variable: Daybasal.																																a. Dependent Variable: Day7.
	Information Criteriaa																																Information Criteriaa
	-2 Restricted Log Likelihood	586.08																															-2 Restricted Log Likelihood	734.491
	Akaike's Information Criterion (AIC)	598.08																															Akaike's Information Criterion (AIC)	746.491
	Hurvich and Tsai's Criterion (AICC)	598.45																															Hurvich and Tsai's Criterion (AICC)	746.861
	Bozdogan's Criterion (CAIC)	624.812																															Bozdogan's Criterion (CAIC)	773.223
	Schwarz's Bayesian Criterion (BIC)	618.812																															Schwarz's Bayesian Criterion (BIC)	767.223
	The information criteria are displayed in smaller-is-better forms.																																The information criteria are displayed in smaller-is-better forms.
	a. Dependent Variable: Daybasal.																																a. Dependent Variable: Day7.
	Fixed Effects																																Fixed Effects
	Type III Tests of Fixed Effectsa																																Type III Tests of Fixed Effectsa
	Source	Numerator df	Denominator df	F	Sig.																												Source	Numerator df	Denominator df	F	Sig.
	Intercept	1	226.628	3281.64	8.30862e-137																												Intercept	1	224.762	5743.88	4.85715e-162
	Surgery	1	226.628	0.303587	0.582185																												Surgery	1	224.762	192.008	5.67599e-32
	Treatment	2	226.628	0.661363	0.517141																												Treatment	2	224.762	9.35877	0.000124718
	Filament	5	76.0617	97.8368	1.11812e-31																												Filament	5	67.8664	34.3553	2.47717e-17
	Surgery * Treatment	0	.	.	.																												Surgery * Treatment	0	.	.	.
	Surgery * Filament	5	76.0617	0.374012	0.865015																												Surgery * Filament	5	67.8664	0.537877	0.746871
	Treatment * Filament	10	76.0617	0.439017	0.922618																												Treatment * Filament	10	67.8664	0.396357	0.943903
	Surgery * Treatment * Filament	0	.	.	.																												Surgery * Treatment * Filament	0	.	.	.
	a. Dependent Variable: Daybasal.																																a. Dependent Variable: Day7.
	Covariance Parameters																																Covariance Parameters
	Estimates of Covariance Parametersa																																Estimates of Covariance Parametersa
	Parameter		Estimate	Std. Error																													Parameter		Estimate	Std. Error
	Repeated Measures	Var: [Filament=1.65]	0.41339	0.0936145																													Repeated Measures	Var: [Filament=1.65]	1.3386	0.303134
		Var: [Filament=2.36]	0.674929	0.152841																														Var: [Filament=2.36]	0.988177	0.223778
		Var: [Filament=2.44]	0.65698	0.148777																														Var: [Filament=2.44]	0.907835	0.205584
		Var: [Filament=2.83]	0.492877	0.111615																														Var: [Filament=2.83]	0.768803	0.1741
		Var: [Filament=3.22]	0.514672	0.11655																														Var: [Filament=3.22]	1.11852	0.253295
		Var: [Filament=3.61]	0.678348	0.153615																														Var: [Filament=3.61]	1.37279	0.310876
	a. Dependent Variable: Daybasal.																																a. Dependent Variable: Day7.
	Estimated Marginal Means																																Estimated Marginal Means
	1. Grand Meanb																																1. Grand Meanb
	Mean	Std. Error	df	95% Confidence Interval																													Mean	Std. Error	df	95% Confidence Interval
				Lower Bound	Upper Bound																															Lower Bound	Upper Bound
	2.918a	0.0474384	226.628	2.82435	3.0113																												5.626a	0.0652661	224.762	5.49755	5.75477
	a. Based on modified population marginal mean. b. Dependent Variable: Daybasal.																																a. Based on modified population marginal mean. b. Dependent Variable: Day7.
	2. Surgery																																2. Surgery
	Estimatesb																																Estimatesb
	Surgery	Mean	Std. Error	df	95% Confidence Interval																												Surgery	Mean	Std. Error	df	95% Confidence Interval
					Lower Bound	Upper Bound																															Lower Bound	Upper Bound
	Endo	2.90895	0.0558408	226.628	2.79892	3.01898																											Endo	6.14043	0.0768263	224.762	5.98904	6.29182
	Sham	2.944a	0.0891212	226.628	2.76883	3.12006																											Sham	4.083a	0.122614	224.762	3.84171	4.32495
	a. Based on modified population marginal mean. b. Dependent Variable: Daybasal.																																a. Based on modified population marginal mean. b. Dependent Variable: Day7.
	Pairwise Comparisonsd																																Pairwise Comparisonsd
	(I) Surgery	(J) Surgery	Mean Difference (I-J)	Std. Error	df	Sig.b	95% Confidence Interval for Differenceb																										(I) Surgery	(J) Surgery	Mean Difference (I-J)	Std. Error	df	Sig.b	95% Confidence Interval for Differenceb
							Lower Bound	Upper Bound																															Lower Bound	Upper Bound
	Endo	Sham	-.035a	0.10517	226.628	0.736061	-0.24273	0.171743																									Endo	Sham	2.057*,a	0.144694	224.762	3.78636e-33	1.77197	2.34223
	Sham	Endo	.035c	0.10517	226.628	0.736061	-0.171743	0.24273																									Sham	Endo	-2.057*,c	0.144694	224.762	3.78636e-33	-2.34223	-1.77197
	Based on estimated marginal means																																Based on estimated marginal means
	a. An estimate of the modified population marginal mean (J). b. Adjustment for multiple comparisons: Bonferroni. c. An estimate of the modified population marginal mean (I). d. Dependent Variable: Daybasal.																																*. The mean difference is significant at the .05 level. a. An estimate of the modified population marginal mean (J). b. Adjustment for multiple comparisons: Bonferroni. c. An estimate of the modified population marginal mean (I). d. Dependent Variable: Day7.
	Univariate Testsa																																Univariate Testsa
	Numerator df	Denominator df	F	Sig.																													Numerator df	Denominator df	F	Sig.
	1	226.628	0.113899	0.736061																													1	224.762	202.12	3.78636e-33
	The F tests the effect of Surgery. This test is based on the linearly independent pairwise comparisons among the estimated marginal means.																																The F tests the effect of Surgery. This test is based on the linearly independent pairwise comparisons among the estimated marginal means.
	a. Dependent Variable: Daybasal.																																a. Dependent Variable: Day7.
	3. Treatment																																3. Treatment
	Estimatesb																																Estimatesb
	Treatment	Mean	Std. Error	df	95% Confidence Interval																												Treatment	Mean	Std. Error	df	95% Confidence Interval
					Lower Bound	Upper Bound																															Lower Bound	Upper Bound
	7daysTHC	3.000a	0.0976274	226.628	2.80763	3.19237																											7daysTHC	6.250a	0.134316	224.762	5.98532	6.51468
	AcuteTHC	2.852a	0.102908	226.628	2.64907	3.05463																											AcuteTHC	5.685a	0.141582	224.762	5.40619	5.96418
	Vehicle	2.90972	0.0630182	226.628	2.78555	3.0339																											Vehicle	5.28472	0.0867009	224.762	5.11387	5.45557
	a. Based on modified population marginal mean. b. Dependent Variable: Daybasal.																																a. Based on modified population marginal mean. b. Dependent Variable: Day7.
	Pairwise Comparisonsd																																Pairwise Comparisonsd
	(I) Treatment	(J) Treatment	Mean Difference (I-J)	Std. Error	df	Sig.c	95% Confidence Interval for Differencec																										(I) Treatment	(J) Treatment	Mean Difference (I-J)	Std. Error	df	Sig.c	95% Confidence Interval for Differencec
							Lower Bound	Upper Bound																															Lower Bound	Upper Bound
	7daysTHC	AcuteTHC	.148a,b	0.141849	226.628	0.892232	-0.193976	0.490272																									7daysTHC	AcuteTHC	.565*,a,b	0.195157	224.762	0.0125284	0.0940891	1.03554
		Vehicle	.090a	0.1162	226.628	1	-0.189982	0.370538																										Vehicle	.965*,a	0.159869	224.762	1.9179e-08	0.57967	1.35089
	AcuteTHC	7daysTHC	-.148a,b	0.141849	226.628	0.892232	-0.490272	0.193976																									AcuteTHC	7daysTHC	-.565*,a,b	0.195157	224.762	0.0125284	-1.03554	-0.0940891
		Vehicle	-.058a	0.120671	226.628	1	-0.348914	0.233173																										Vehicle	.400*,a	0.16602	224.762	0.0499852	1.8368e-05	0.800908
	Vehicle	7daysTHC	-.090b	0.1162	226.628	1	-0.370538	0.189982																									Vehicle	7daysTHC	-.965*,b	0.159869	224.762	1.9179e-08	-1.35089	-0.57967
		AcuteTHC	.058b	0.120671	226.628	1	-0.233173	0.348914																										AcuteTHC	-.400*,b	0.16602	224.762	0.0499852	-0.800908	-1.8368e-05
	Based on estimated marginal means																																Based on estimated marginal means
	a. An estimate of the modified population marginal mean (I). b. An estimate of the modified population marginal mean (J). c. Adjustment for multiple comparisons: Bonferroni. d. Dependent Variable: Daybasal.																																*. The mean difference is significant at the .05 level. a. An estimate of the modified population marginal mean (I). b. An estimate of the modified population marginal mean (J). c. Adjustment for multiple comparisons: Bonferroni. d. Dependent Variable: Day7.
	Univariate Testsa																																Univariate Testsa
	Numerator df	Denominator df	F	Sig.																													Numerator df	Denominator df	F	Sig.
	2	226.628	0.567872	0.567534																													2	224.762	18.4963	3.66079e-08
	The F tests the effect of Treatment. This test is based on the linearly independent pairwise comparisons among the estimated marginal means.																																The F tests the effect of Treatment. This test is based on the linearly independent pairwise comparisons among the estimated marginal means.
	a. Dependent Variable: Daybasal.																																a. Dependent Variable: Day7.
	4. Filament																																4. Filament
	Estimatesb																																Estimatesb
	Filament	Mean	Std. Error	df	95% Confidence Interval																												Filament	Mean	Std. Error	df	95% Confidence Interval
					Lower Bound	Upper Bound																															Lower Bound	Upper Bound
	1.65	1.122a	0.0987958	39	0.922389	1.32206																											1.65	3.976a	0.177781	39	3.61679	4.33598
	2.36	2.103a	0.126237	39	1.84744	2.35812																											2.36	4.782a	0.152748	39	4.47298	5.09091
	2.44	2.836a	0.124547	39	2.58419	3.08803																											2.44	5.515a	0.146407	39	5.21914	5.81141
	2.83	3.361a	0.107877	39	3.14291	3.57931																											2.83	5.963a	0.13473	39	5.68998	6.23502
	3.22	3.874a	0.110236	39	3.65064	4.09658																											3.22	6.531a	0.16251	39	6.20185	6.85926
	3.61	4.211a	0.126556	39	3.95513	4.4671																											3.61	6.990a	0.180037	39	6.62612	7.35444
	a. Based on modified population marginal mean. b. Dependent Variable: Daybasal.																																a. Based on modified population marginal mean. b. Dependent Variable: Day7.
	Pairwise Comparisonsd																																Pairwise Comparisonsd
	(I) Filament	(J) Filament	Mean Difference (I-J)	Std. Error	df	Sig.c	95% Confidence Interval for Differencec																										(I) Filament	(J) Filament	Mean Difference (I-J)	Std. Error	df	Sig.c	95% Confidence Interval for Differencec
							Lower Bound	Upper Bound																															Lower Bound	Upper Bound
	1.65	2.36	-.981*,a,b	0.160301	73.7414	6.26534e-07	-1.46688	-0.49423																									1.65	2.36	-.806*,a,b	0.234388	76.27	0.0143392	-1.51586	-0.0952508
		2.44	-1.714*,a,b	0.158974	74.1593	1.15319e-15	-2.1961	-1.23168																										2.44	-1.539*,a,b	0.230306	75.2336	5.40017e-08	-2.23713	-0.840644
		2.83	-2.239*,a,b	0.146281	77.4045	6.03687e-24	-2.68198	-1.7958																										2.83	-1.986*,a,b	0.223066	72.6863	4.38346e-12	-2.66318	-1.30904
		3.22	-2.751*,a,b	0.148029	77.082	4.97374e-29	-3.19983	-2.30295																										3.22	-2.554*,a,b	0.240864	77.3792	1.45744e-15	-3.28376	-1.82458
		3.61	-3.089*,a,b	0.160553	73.6614	2.85136e-29	-3.576	-2.60178																										3.61	-3.014*,a,b	0.25302	77.9876	4.67416e-18	-3.78011	-2.24767
	2.36	1.65	.981*,a,b	0.160301	73.7414	6.26534e-07	0.49423	1.46688																									2.36	1.65	.806*,a,b	0.234388	76.27	0.0143392	0.0952508	1.51586
		2.44	-.733*,a,b	0.177335	77.9858	0.00132975	-1.27036	-0.196308																										2.44	-.733*,a,b	0.211582	77.8602	0.0129424	-1.3741	-0.0925658
		2.83	-1.258*,a,b	0.166052	76.1494	1.04606e-09	-1.76157	-0.755094																										2.83	-1.181*,a,b	0.203677	76.8027	2.13235e-06	-1.79765	-0.563459
		3.22	-1.771*,a,b	0.167594	76.6097	1.93937e-15	-2.27865	-1.26302																										3.22	-1.749*,a,b	0.223028	77.7026	2.93875e-10	-2.42409	-1.07314
		3.61	-2.108*,a,b	0.178752	77.9995	7.67437e-18	-2.64965	-1.56702																										3.61	-2.208*,a,b	0.236104	75.9835	4.23729e-13	-2.92392	-1.49274
	2.44	1.65	1.714*,a,b	0.158974	74.1593	1.15319e-15	1.23168	2.1961																									2.44	1.65	1.539*,a,b	0.230306	75.2336	5.40017e-08	0.840644	2.23713
		2.36	.733*,a,b	0.177335	77.9858	0.00132975	0.196308	1.27036																										2.36	.733*,a,b	0.211582	77.8602	0.0129424	0.0925658	1.3741
		2.83	-.525*,a,b	0.164771	76.443	0.0313147	-1.02429	-0.025705																										2.83	-.447a,b	0.198966	77.4673	0.41156	-1.04988	0.155434
		3.22	-1.038*,a,b	0.166325	76.8661	3.33905e-07	-1.54142	-0.533585																										3.22	-1.015*,a,b	0.218734	77.1658	0.000208737	-1.67789	-0.352663
		3.61	-1.375*,a,b	0.177563	77.98	4.42571e-10	-1.91272	-0.837284																										3.61	-1.475*,a,b	0.232052	74.8874	2.19173e-07	-2.17865	-0.771355
	2.83	1.65	2.239*,a,b	0.146281	77.4045	6.03687e-24	1.7958	2.68198																									2.83	1.65	1.986*,a,b	0.223066	72.6863	4.38346e-12	1.30904	2.66318
		2.36	1.258*,a,b	0.166052	76.1494	1.04606e-09	0.755094	1.76157																										2.36	1.181*,a,b	0.203677	76.8027	2.13235e-06	0.563459	1.79765
		2.44	.525*,a,b	0.164771	76.443	0.0313147	0.025705	1.02429																										2.44	.447a,b	0.198966	77.4673	0.41156	-0.155434	1.04988
		3.22	-.513*,a,b	0.154238	77.9635	0.0203851	-0.979584	-0.0454159																										3.22	-.568a,b	0.211097	75.4108	0.131549	-1.20801	0.0719005
		3.61	-.850*,a,b	0.166295	76.0919	3.46807e-05	-1.35399	-0.346012																										3.61	-1.028*,a,b	0.224868	72.253	0.000294289	-1.71046	-0.345097
	3.22	1.65	2.751*,a,b	0.148029	77.082	4.97374e-29	2.30295	3.19983																									3.22	1.65	2.554*,a,b	0.240864	77.3792	1.45744e-15	1.82458	3.28376
		2.36	1.771*,a,b	0.167594	76.6097	1.93937e-15	1.26302	2.27865																										2.36	1.749*,a,b	0.223028	77.7026	2.93875e-10	1.07314	2.42409
		2.44	1.038*,a,b	0.166325	76.8661	3.33905e-07	0.533585	1.54142																										2.44	1.015*,a,b	0.218734	77.1658	0.000208737	0.352663	1.67789
		2.83	.513*,a,b	0.154238	77.9635	0.0203851	0.0454159	0.979584																										2.83	.568a,b	0.211097	75.4108	0.131549	-0.0719005	1.20801
		3.61	-.338a,b	0.167835	76.559	0.717844	-0.846055	0.171055																										3.61	-.460a,b	0.242534	77.1958	0.926544	-1.19443	0.274982
	3.61	1.65	3.089*,a,b	0.160553	73.6614	2.85136e-29	2.60178	3.576																									3.61	1.65	3.014*,a,b	0.25302	77.9876	4.67416e-18	2.24767	3.78011
		2.36	2.108*,a,b	0.178752	77.9995	7.67437e-18	1.56702	2.64965																										2.36	2.208*,a,b	0.236104	75.9835	4.23729e-13	1.49274	2.92392
		2.44	1.375*,a,b	0.177563	77.98	4.42571e-10	0.837284	1.91272																										2.44	1.475*,a,b	0.232052	74.8874	2.19173e-07	0.771355	2.17865
		2.83	.850*,a,b	0.166295	76.0919	3.46807e-05	0.346012	1.35399																										2.83	1.028*,a,b	0.224868	72.253	0.000294289	0.345097	1.71046
		3.22	.338a,b	0.167835	76.559	0.717844	-0.171055	0.846055																										3.22	.460a,b	0.242534	77.1958	0.926544	-0.274982	1.19443
	Based on estimated marginal means																																Based on estimated marginal means
	*. The mean difference is significant at the .05 level. a. An estimate of the modified population marginal mean (I). b. An estimate of the modified population marginal mean (J). c. Adjustment for multiple comparisons: Bonferroni. d. Dependent Variable: Daybasal.																																*. The mean difference is significant at the .05 level. a. An estimate of the modified population marginal mean (I). b. An estimate of the modified population marginal mean (J). c. Adjustment for multiple comparisons: Bonferroni. d. Dependent Variable: Day7.
	Univariate Testsa																																Univariate Testsa
	Numerator df	Denominator df	F	Sig.																													Numerator df	Denominator df	F	Sig.
	5	83.5933	112.987	1.12377e-35																													5	67.5394	42.368	1.56609e-19
	The F tests the effect of Filament. This test is based on the linearly independent pairwise comparisons among the estimated marginal means.																																The F tests the effect of Filament. This test is based on the linearly independent pairwise comparisons among the estimated marginal means.
	a. Dependent Variable: Daybasal.																																a. Dependent Variable: Day7.
	5. Surgery * Treatment																																5. Surgery * Treatment
	Estimatesb																																Estimatesb
	Surgery	Treatment	Mean	Std. Error	df	95% Confidence Interval																											Surgery	Treatment	Mean	Std. Error	df	95% Confidence Interval
						Lower Bound	Upper Bound																															Lower Bound	Upper Bound
	Endo	7daysTHC	3	0.0976274	226.628	2.80763	3.19237																										Endo	7daysTHC	6.25	0.134316	224.762	5.98532	6.51468
		AcuteTHC	2.85185	0.102908	226.628	2.64907	3.05463																											AcuteTHC	5.68519	0.141582	224.762	5.40619	5.96418
		Vehicle	2.875	0.0891212	226.628	2.69939	3.05061																											Vehicle	6.48611	0.122614	224.762	6.24449	6.72773
	Sham	7daysTHC	.a	.	.	.	.																										Sham	7daysTHC	.a	.	.	.	.
		AcuteTHC	.a	.	.	.	.																											AcuteTHC	.a	.	.	.	.
		Vehicle	2.94444	0.0891212	226.628	2.76883	3.12006																											Vehicle	4.08333	0.122614	224.762	3.84171	4.32495
	a. This level combination of factors is not observed, thus the corresponding population marginal mean is not estimable. b. Dependent Variable: Daybasal.																																a. This level combination of factors is not observed, thus the corresponding population marginal mean is not estimable. b. Dependent Variable: Day7.
	Pairwise Comparisonsd																																Pairwise Comparisonsd
	Treatment	(I) Surgery	(J) Surgery	Mean Difference (I-J)	Std. Error	df	Sig.b	95% Confidence Interval for Differenceb																									Treatment	(I) Surgery	(J) Surgery	Mean Difference (I-J)	Std. Error	df	Sig.b	95% Confidence Interval for Differenceb
								Lower Bound	Upper Bound																															Lower Bound	Upper Bound
	7daysTHC	Endo	Sham	.a	.	.	.	.	.																								7daysTHC	Endo	Sham	.a	.	.	.	.	.
		Sham	Endo	.c	.	.	.	.	.																									Sham	Endo	.c	.	.	.	.	.
	AcuteTHC	Endo	Sham	.a	.	.	.	.	.																								AcuteTHC	Endo	Sham	.a	.	.	.	.	.
		Sham	Endo	.c	.	.	.	.	.																									Sham	Endo	.c	.	.	.	.	.
	Vehicle	Endo	Sham	-0.0694444	0.126036	226.628	0.582185	-0.317797	0.178909																								Vehicle	Endo	Sham	2.403*	0.173402	224.762	5.67599e-32	2.06108	2.74448
		Sham	Endo	0.0694444	0.126036	226.628	0.582185	-0.178909	0.317797																									Sham	Endo	-2.403*	0.173402	224.762	5.67599e-32	-2.74448	-2.06108
	Based on estimated marginal means																																Based on estimated marginal means
	a. The level combination of factors in (J) is not observed. b. Adjustment for multiple comparisons: Bonferroni. c. The level combination of factors in (I) is not observed. d. Dependent Variable: Daybasal.																																a. The level combination of factors in (J) is not observed. b. Adjustment for multiple comparisons: Bonferroni. c. The level combination of factors in (I) is not observed. *. The mean difference is significant at the .05 level. d. Dependent Variable: Day7.
	Univariate Testsa																																Univariate Testsa
	Treatment	Numerator df	Denominator df	F	Sig.																												Treatment	Numerator df	Denominator df	F	Sig.
	7daysTHC	0	.	.	.																												7daysTHC	0	.	.	.
	AcuteTHC	0	.	.	.																												AcuteTHC	0	.	.	.
	Vehicle	1	226.628	0.303587	0.582185																												Vehicle	1	224.762	192.008	5.67599e-32
	Each F tests the simple effects of Surgery within each level combination of the other effects shown. These tests are based on the estimable linearly independent pairwise comparisons among the estimated marginal means.																																Each F tests the simple effects of Surgery within each level combination of the other effects shown. These tests are based on the estimable linearly independent pairwise comparisons among the estimated marginal means.
	a. Dependent Variable: Daybasal.																																a. Dependent Variable: Day7.
	6. Surgery * Treatment																																6. Surgery * Treatment
	Estimatesb																																Estimatesb
	Surgery	Treatment	Mean	Std. Error	df	95% Confidence Interval																											Surgery	Treatment	Mean	Std. Error	df	95% Confidence Interval
						Lower Bound	Upper Bound																															Lower Bound	Upper Bound
	Endo	7daysTHC	3	0.0976274	226.628	2.80763	3.19237																										Endo	7daysTHC	6.25	0.134316	224.762	5.98532	6.51468
		AcuteTHC	2.85185	0.102908	226.628	2.64907	3.05463																											AcuteTHC	5.68519	0.141582	224.762	5.40619	5.96418
		Vehicle	2.875	0.0891212	226.628	2.69939	3.05061																											Vehicle	6.48611	0.122614	224.762	6.24449	6.72773
	Sham	7daysTHC	.a	.	.	.	.																										Sham	7daysTHC	.a	.	.	.	.
		AcuteTHC	.a	.	.	.	.																											AcuteTHC	.a	.	.	.	.
		Vehicle	2.94444	0.0891212	226.628	2.76883	3.12006																											Vehicle	4.08333	0.122614	224.762	3.84171	4.32495
	a. This level combination of factors is not observed, thus the corresponding population marginal mean is not estimable. b. Dependent Variable: Daybasal.																																a. This level combination of factors is not observed, thus the corresponding population marginal mean is not estimable. b. Dependent Variable: Day7.
	Pairwise Comparisonsd																																Pairwise Comparisonsd
	Surgery	(I) Treatment	(J) Treatment	Mean Difference (I-J)	Std. Error	df	Sig.a	95% Confidence Interval for Differencea																									Surgery	(I) Treatment	(J) Treatment	Mean Difference (I-J)	Std. Error	df	Sig.a	95% Confidence Interval for Differencea
								Lower Bound	Upper Bound																															Lower Bound	Upper Bound
	Endo	7daysTHC	AcuteTHC	0.148148	0.141849	226.628	0.892232	-0.193976	0.490272																								Endo	7daysTHC	AcuteTHC	.565*	0.195157	224.762	0.0125284	0.0940891	1.03554
			Vehicle	0.125	0.132188	226.628	1	-0.193822	0.443822																										Vehicle	-0.236111	0.181865	224.762	0.586571	-0.674776	0.202554
		AcuteTHC	7daysTHC	-0.148148	0.141849	226.628	0.892232	-0.490272	0.193976																									AcuteTHC	7daysTHC	-.565*	0.195157	224.762	0.0125284	-1.03554	-0.0940891
			Vehicle	-0.0231481	0.136135	226.628	1	-0.351489	0.305193																										Vehicle	-.801*	0.187295	224.762	8.43165e-05	-1.25269	-0.349163
		Vehicle	7daysTHC	-0.125	0.132188	226.628	1	-0.443822	0.193822																									Vehicle	7daysTHC	0.236111	0.181865	224.762	0.586571	-0.202554	0.674776
			AcuteTHC	0.0231481	0.136135	226.628	1	-0.305193	0.351489																										AcuteTHC	.801*	0.187295	224.762	8.43165e-05	0.349163	1.25269
	Sham	7daysTHC	AcuteTHC	.b,c	.	.	.	.	.																								Sham	7daysTHC	AcuteTHC	.b,c	.	.	.	.	.
			Vehicle	.b	.	.	.	.	.																										Vehicle	.b	.	.	.	.	.
		AcuteTHC	7daysTHC	.b,c	.	.	.	.	.																									AcuteTHC	7daysTHC	.b,c	.	.	.	.	.
			Vehicle	.b	.	.	.	.	.																										Vehicle	.b	.	.	.	.	.
		Vehicle	7daysTHC	.c	.	.	.	.	.																									Vehicle	7daysTHC	.c	.	.	.	.	.
			AcuteTHC	.c	.	.	.	.	.																										AcuteTHC	.c	.	.	.	.	.
	Based on estimated marginal means																																Based on estimated marginal means
	a. Adjustment for multiple comparisons: Bonferroni. b. The level combination of factors in (I) is not observed. c. The level combination of factors in (J) is not observed. d. Dependent Variable: Daybasal.																																*. The mean difference is significant at the .05 level. a. Adjustment for multiple comparisons: Bonferroni. b. The level combination of factors in (I) is not observed. c. The level combination of factors in (J) is not observed. d. Dependent Variable: Day7.
	Univariate Testsa																																Univariate Testsa
	Surgery	Numerator df	Denominator df	F	Sig.																												Surgery	Numerator df	Denominator df	F	Sig.
	Endo	2	226.628	0.661363	0.517141																												Endo	2	224.762	9.35877	0.000124718
	Sham	0	.	.	.																												Sham	0	.	.	.
	Each F tests the simple effects of Treatment within each level combination of the other effects shown. These tests are based on the estimable linearly independent pairwise comparisons among the estimated marginal means.																																Each F tests the simple effects of Treatment within each level combination of the other effects shown. These tests are based on the estimable linearly independent pairwise comparisons among the estimated marginal means.
	a. Dependent Variable: Daybasal.																																a. Dependent Variable: Day7.
	7. Surgery * Filament																																7. Surgery * Filament
	Estimatesb																																Estimatesb
	Surgery	Filament	Mean	Std. Error	df	95% Confidence Interval																											Surgery	Filament	Mean	Std. Error	df	95% Confidence Interval
						Lower Bound	Upper Bound																															Lower Bound	Upper Bound
	Endo	1.65	1.16296	0.116295	39	0.927734	1.39819																										Endo	1.65	4.41296	0.20927	39	3.98967	4.83625
		2.36	2.08148	0.148597	39	1.78092	2.38205																											2.36	5.20926	0.179803	39	4.84557	5.57295
		2.44	2.80926	0.146608	39	2.51272	3.1058																											2.44	5.99259	0.172339	39	5.644	6.34118
		2.83	3.34259	0.126984	39	3.08574	3.59944																											2.83	6.50556	0.158594	39	6.18477	6.82634
		3.22	3.85926	0.129761	39	3.59679	4.12173																											3.22	7.06852	0.191294	39	6.68159	7.45545
		3.61	4.19815	0.148973	39	3.89682	4.49947																											3.61	7.6537	0.211925	39	7.22504	8.08236
	Sham	1.65	1.000a	0.185605	39	0.624579	1.37542																										Sham	1.65	2.667a	0.333992	39	1.99111	3.34223
		2.36	2.167a	0.237158	39	1.68697	2.64636																											2.36	3.500a	0.286964	39	2.91956	4.08044
		2.44	2.917a	0.233984	39	2.44339	3.38994																											2.44	4.083a	0.275051	39	3.52699	4.63968
		2.83	3.417a	0.202665	39	3.00674	3.8266																											2.83	4.333a	0.253115	39	3.82136	4.84531
		3.22	3.917a	0.207097	39	3.49777	4.33556																											3.22	4.917a	0.305303	39	4.29913	5.5342
		3.61	4.250a	0.237758	39	3.76909	4.73091																											3.61	5.000a	0.33823	39	4.31587	5.68413
	a. Based on modified population marginal mean. b. Dependent Variable: Daybasal.																																a. Based on modified population marginal mean. b. Dependent Variable: Day7.
	Pairwise Comparisonsd																																Pairwise Comparisonsd
	Filament	(I) Surgery	(J) Surgery	Mean Difference (I-J)	Std. Error	df	Sig.b	95% Confidence Interval for Differenceb																									Filament	(I) Surgery	(J) Surgery	Mean Difference (I-J)	Std. Error	df	Sig.b	95% Confidence Interval for Differenceb
								Lower Bound	Upper Bound																															Lower Bound	Upper Bound
	1.65	Endo	Sham	.163a	0.219029	39	0.461321	-0.280065	0.605991																								1.65	Endo	Sham	1.746*,a	0.394137	39	7.40395e-05	0.949078	2.54351
		Sham	Endo	-.163c	0.219029	39	0.461321	-0.605991	0.280065																									Sham	Endo	-1.746*,c	0.394137	39	7.40395e-05	-2.54351	-0.949078
	2.36	Endo	Sham	-.085a	0.279866	39	0.762458	-0.651268	0.480898																								2.36	Endo	Sham	1.709*,a	0.33864	39	1.07824e-05	1.02429	2.39422
		Sham	Endo	.085c	0.279866	39	0.762458	-0.480898	0.651268																									Sham	Endo	-1.709*,c	0.33864	39	1.07824e-05	-2.39422	-1.02429
	2.44	Endo	Sham	-.107a	0.27612	39	0.6994	-0.665912	0.451098																								2.44	Endo	Sham	1.909*,a	0.324582	39	7.54889e-07	1.25273	2.56579
		Sham	Endo	.107c	0.27612	39	0.6994	-0.451098	0.665912																									Sham	Endo	-1.909*,c	0.324582	39	7.54889e-07	-2.56579	-1.25273
	2.83	Endo	Sham	-.074a	0.239161	39	0.75842	-0.557823	0.409675																								2.83	Endo	Sham	2.172*,a	0.298696	39	9.08578e-09	1.56805	2.77639
		Sham	Endo	.074c	0.239161	39	0.75842	-0.409675	0.557823																									Sham	Endo	-2.172*,c	0.298696	39	9.08578e-09	-2.77639	-1.56805
	3.22	Endo	Sham	-.057a	0.244392	39	0.815516	-0.551737	0.436922																								3.22	Endo	Sham	2.152*,a	0.360282	39	5.65182e-07	1.42311	2.88059
		Sham	Endo	.057c	0.244392	39	0.815516	-0.436922	0.551737																									Sham	Endo	-2.152*,c	0.360282	39	5.65182e-07	-2.88059	-1.42311
	3.61	Endo	Sham	-.052a	0.280574	39	0.854339	-0.619367	0.515663																								3.61	Endo	Sham	2.654*,a	0.399139	39	6.53202e-08	1.84637	3.46104
		Sham	Endo	.052c	0.280574	39	0.854339	-0.515663	0.619367																									Sham	Endo	-2.654*,c	0.399139	39	6.53202e-08	-3.46104	-1.84637
	Based on estimated marginal means																																Based on estimated marginal means
	a. An estimate of the modified population marginal mean (J). b. Adjustment for multiple comparisons: Bonferroni. c. An estimate of the modified population marginal mean (I). d. Dependent Variable: Daybasal.																																*. The mean difference is significant at the .05 level. a. An estimate of the modified population marginal mean (J). b. Adjustment for multiple comparisons: Bonferroni. c. An estimate of the modified population marginal mean (I). d. Dependent Variable: Day7.
	Univariate Testsa																																Univariate Testsa
	Filament	Numerator df	Denominator df	F	Sig.																												Filament	Numerator df	Denominator df	F	Sig.
	1.65	1	39	0.553573	0.461321																												1.65	1	39	19.6309	7.40395e-05
	2.36	1	39	0.0926461	0.762458																												2.36	1	39	25.4764	1.07824e-05
	2.44	1	39	0.151312	0.6994																												2.44	1	39	34.6003	7.54889e-07
	2.83	1	39	0.0959292	0.75842																												2.83	1	39	52.8872	9.08578e-09
	3.22	1	39	0.0551775	0.815516																												3.22	1	39	35.6729	5.65182e-07
	3.61	1	39	0.0341534	0.854339																												3.61	1	39	44.2036	6.53202e-08
	Each F tests the simple effects of Surgery within each level combination of the other effects shown. These tests are based on the linearly independent pairwise comparisons among the estimated marginal means.																																Each F tests the simple effects of Surgery within each level combination of the other effects shown. These tests are based on the linearly independent pairwise comparisons among the estimated marginal means.
	a. Dependent Variable: Daybasal.																																a. Dependent Variable: Day7.
	8. Surgery * Filament																																8. Surgery * Filament
	Estimatesb																																Estimatesb
	Surgery	Filament	Mean	Std. Error	df	95% Confidence Interval																											Surgery	Filament	Mean	Std. Error	df	95% Confidence Interval
						Lower Bound	Upper Bound																															Lower Bound	Upper Bound
	Endo	1.65	1.16296	0.116295	39	0.927734	1.39819																										Endo	1.65	4.41296	0.20927	39	3.98967	4.83625
		2.36	2.08148	0.148597	39	1.78092	2.38205																											2.36	5.20926	0.179803	39	4.84557	5.57295
		2.44	2.80926	0.146608	39	2.51272	3.1058																											2.44	5.99259	0.172339	39	5.644	6.34118
		2.83	3.34259	0.126984	39	3.08574	3.59944																											2.83	6.50556	0.158594	39	6.18477	6.82634
		3.22	3.85926	0.129761	39	3.59679	4.12173																											3.22	7.06852	0.191294	39	6.68159	7.45545
		3.61	4.19815	0.148973	39	3.89682	4.49947																											3.61	7.6537	0.211925	39	7.22504	8.08236
	Sham	1.65	1.000a	0.185605	39	0.624579	1.37542																										Sham	1.65	2.667a	0.333992	39	1.99111	3.34223
		2.36	2.167a	0.237158	39	1.68697	2.64636																											2.36	3.500a	0.286964	39	2.91956	4.08044
		2.44	2.917a	0.233984	39	2.44339	3.38994																											2.44	4.083a	0.275051	39	3.52699	4.63968
		2.83	3.417a	0.202665	39	3.00674	3.8266																											2.83	4.333a	0.253115	39	3.82136	4.84531
		3.22	3.917a	0.207097	39	3.49777	4.33556																											3.22	4.917a	0.305303	39	4.29913	5.5342
		3.61	4.250a	0.237758	39	3.76909	4.73091																											3.61	5.000a	0.33823	39	4.31587	5.68413
	a. Based on modified population marginal mean. b. Dependent Variable: Daybasal.																																a. Based on modified population marginal mean. b. Dependent Variable: Day7.
	Pairwise Comparisonsd																																Pairwise Comparisonsd
	Surgery	(I) Filament	(J) Filament	Mean Difference (I-J)	Std. Error	df	Sig.a	95% Confidence Interval for Differencea																									Surgery	(I) Filament	(J) Filament	Mean Difference (I-J)	Std. Error	df	Sig.a	95% Confidence Interval for Differencea
								Lower Bound	Upper Bound																															Lower Bound	Upper Bound
	Endo	1.65	2.36	-.919*	0.188694	73.7414	9.36829e-05	-1.49098	-0.346053																								Endo	1.65	2.36	-0.796296	0.275904	76.27	0.076049	-1.63241	0.0398204
			2.44	-1.646*	0.187132	74.1593	5.92011e-12	-2.21391	-1.07868																										2.44	-1.580*	0.271099	75.2336	1.97612e-06	-2.40155	-0.757709
			2.83	-2.180*	0.17219	77.4045	2.29916e-19	-2.7012	-1.65806																										2.83	-2.093*	0.262576	72.6863	2.47459e-10	-2.88959	-1.2956
			3.22	-2.696*	0.174249	77.082	3.53983e-24	-3.22417	-2.16842																										3.22	-2.656*	0.283527	77.3792	3.3953e-13	-3.51437	-1.79674
			3.61	-3.035*	0.18899	73.6614	1.35629e-24	-3.60857	-2.4618																										3.61	-3.241*	0.297836	77.9876	3.95764e-16	-4.14268	-2.3388
		2.36	1.65	.919*	0.188694	73.7414	9.36829e-05	0.346053	1.49098																									2.36	1.65	0.796296	0.275904	76.27	0.076049	-0.0398204	1.63241
			2.44	-.728*	0.208746	77.9858	0.0121067	-1.35992	-0.0956319																										2.44	-.783*	0.249058	77.8602	0.0352593	-1.5376	-0.0290705
			2.83	-1.261*	0.195464	76.1494	1.38336e-07	-1.85349	-0.668736																										2.83	-1.296*	0.239753	76.8027	1.04975e-05	-2.0227	-0.569897
			3.22	-1.778*	0.197279	76.6097	1.78232e-12	-2.37554	-1.18002																										3.22	-1.859*	0.262531	77.7026	8.38133e-09	-2.65438	-1.06414
			3.61	-2.117*	0.210414	77.9995	1.45421e-14	-2.75386	-1.47947																										3.61	-2.444*	0.277924	75.9835	4.94548e-12	-3.28678	-1.6021
		2.44	1.65	1.646*	0.187132	74.1593	5.92011e-12	1.07868	2.21391																									2.44	1.65	1.580*	0.271099	75.2336	1.97612e-06	0.757709	2.40155
			2.36	.728*	0.208746	77.9858	0.0121067	0.0956319	1.35992																										2.36	.783*	0.249058	77.8602	0.0352593	0.0290705	1.5376
			2.83	-0.533333	0.193956	76.443	0.111596	-1.12107	0.0543988																										2.83	-0.512963	0.234207	77.4673	0.472758	-1.22236	0.196438
			3.22	-1.050*	0.195785	76.8661	1.25053e-05	-1.64317	-0.456829																										3.22	-1.076*	0.257477	77.1658	0.00114844	-1.85591	-0.295946
			3.61	-1.389*	0.209014	77.98	5.55765e-08	-2.02185	-0.755931																										3.61	-1.661*	0.273154	74.8874	6.95863e-07	-2.48939	-0.832834
		2.83	1.65	2.180*	0.17219	77.4045	2.29916e-19	1.65806	2.7012																									2.83	1.65	2.093*	0.262576	72.6863	2.47459e-10	1.2956	2.88959
			2.36	1.261*	0.195464	76.1494	1.38336e-07	0.668736	1.85349																										2.36	1.296*	0.239753	76.8027	1.04975e-05	0.569897	2.0227
			2.44	0.533333	0.193956	76.443	0.111596	-0.0543988	1.12107																										2.44	0.512963	0.234207	77.4673	0.472758	-0.196438	1.22236
			3.22	-0.516667	0.181557	77.9635	0.0848813	-1.06648	0.0331492																										3.22	-0.562963	0.248487	75.4108	0.395225	-1.31627	0.190345
			3.61	-.856*	0.195749	76.0919	0.000580638	-1.44881	-0.262299																										3.61	-1.148*	0.264697	72.253	0.000689209	-1.95175	-0.344548
		3.22	1.65	2.696*	0.174249	77.082	3.53983e-24	2.16842	3.22417																									3.22	1.65	2.656*	0.283527	77.3792	3.3953e-13	1.79674	3.51437
			2.36	1.778*	0.197279	76.6097	1.78232e-12	1.18002	2.37554																										2.36	1.859*	0.262531	77.7026	8.38133e-09	1.06414	2.65438
			2.44	1.050*	0.195785	76.8661	1.25053e-05	0.456829	1.64317																										2.44	1.076*	0.257477	77.1658	0.00114844	0.295946	1.85591
			2.83	0.516667	0.181557	77.9635	0.0848813	-0.0331492	1.06648																										2.83	0.562963	0.248487	75.4108	0.395225	-0.190345	1.31627
			3.61	-0.338889	0.197562	76.559	1	-0.937521	0.259743																										3.61	-0.585185	0.285492	77.1958	0.65679	-1.45002	0.279652
		3.61	1.65	3.035*	0.18899	73.6614	1.35629e-24	2.4618	3.60857																									3.61	1.65	3.241*	0.297836	77.9876	3.95764e-16	2.3388	4.14268
			2.36	2.117*	0.210414	77.9995	1.45421e-14	1.47947	2.75386																										2.36	2.444*	0.277924	75.9835	4.94548e-12	1.6021	3.28678
			2.44	1.389*	0.209014	77.98	5.55765e-08	0.755931	2.02185																										2.44	1.661*	0.273154	74.8874	6.95863e-07	0.832834	2.48939
			2.83	.856*	0.195749	76.0919	0.000580638	0.262299	1.44881																										2.83	1.148*	0.264697	72.253	0.000689209	0.344548	1.95175
			3.22	0.338889	0.197562	76.559	1	-0.259743	0.937521																										3.22	0.585185	0.285492	77.1958	0.65679	-0.279652	1.45002
	Sham	1.65	2.36	-1.167*,b,c	0.301153	73.7414	0.00344788	-2.08031	-0.25302																								Sham	1.65	2.36	-.833b,c	0.440339	76.27	0.933322	-2.16776	0.501097
			2.44	-1.917*,b,c	0.29866	74.1593	1.74724e-07	-2.82258	-1.01076																										2.44	-1.417*,b,c	0.43267	75.2336	0.0240386	-2.72844	-0.104892
			2.83	-2.417*,b,c	0.274813	77.4045	4.3142e-12	-3.24908	-1.58425																										2.83	-1.667*,b,c	0.419067	72.6863	0.00244641	-2.93866	-0.39467
			3.22	-2.917*,b,c	0.278098	77.082	2.53347e-15	-3.75915	-2.07419																										3.22	-2.250*,b,c	0.452504	77.3792	5.83082e-05	-3.62066	-0.879339
			3.61	-3.250*,b,c	0.301626	73.6614	1.2879e-15	-4.16511	-2.33489																										3.61	-2.333*,b,c	0.475342	77.9876	7.38741e-05	-3.77281	-0.893855
		2.36	1.65	1.167*,b,c	0.301153	73.7414	0.00344788	0.25302	2.08031																									2.36	1.65	.833b,c	0.440339	76.27	0.933322	-0.501097	2.16776
			2.44	-.750b,c	0.333155	77.9858	0.407819	-1.7589	0.258896																										2.44	-.583b,c	0.397493	77.8602	1	-1.78713	0.620459
			2.83	-1.250*,b,c	0.311957	76.1494	0.0021305	-2.19542	-0.304578																										2.83	-.833b,c	0.382642	76.8027	0.487313	-1.99266	0.325989
			3.22	-1.750*,b,c	0.314855	76.6097	5.70835e-06	-2.70402	-0.795982																										3.22	-1.417*,b,c	0.418996	77.7026	0.0169854	-2.68566	-0.147672
			3.61	-2.083*,b,c	0.335817	77.9995	3.6947e-07	-3.10028	-1.06638																										3.61	-1.500*,b,c	0.443562	75.9835	0.0171107	-2.84436	-0.155638
		2.44	1.65	1.917*,b,c	0.29866	74.1593	1.74724e-07	1.01076	2.82258																									2.44	1.65	1.417*,b,c	0.43267	75.2336	0.0240386	0.104892	2.72844
			2.36	.750b,c	0.333155	77.9858	0.407819	-0.258896	1.7589																										2.36	.583b,c	0.397493	77.8602	1	-0.620459	1.78713
			2.83	-.500b,c	0.30955	76.443	1	-1.43801	0.438012																										2.83	-.250b,c	0.373791	77.4673	1	-1.38219	0.882193
			3.22	-1.000*,b,c	0.31247	76.8661	0.0299425	-1.94669	-0.0533083																										3.22	-.833b,c	0.410929	77.1658	0.690296	-2.07817	0.411504
			3.61	-1.333*,b,c	0.333583	77.98	0.00216801	-2.34353	-0.323141																										3.61	-.917b,c	0.43595	74.8874	0.582804	-2.23859	0.405252
		2.83	1.65	2.417*,b,c	0.274813	77.4045	4.3142e-12	1.58425	3.24908																									2.83	1.65	1.667*,b,c	0.419067	72.6863	0.00244641	0.39467	2.93866
			2.36	1.250*,b,c	0.311957	76.1494	0.0021305	0.304578	2.19542																										2.36	.833b,c	0.382642	76.8027	0.487313	-0.325989	1.99266
			2.44	.500b,c	0.30955	76.443	1	-0.438012	1.43801																										2.44	.250b,c	0.373791	77.4673	1	-0.882193	1.38219
			3.22	-.500b,c	0.289763	77.9635	1	-1.3775	0.377498																										3.22	-.583b,c	0.396581	75.4108	1	-1.7856	0.618935
			3.61	-.833b,c	0.312413	76.0919	0.140026	-1.78016	0.113495																										3.61	-.667b,c	0.422453	72.253	1	-1.9492	0.615867
		3.22	1.65	2.917*,b,c	0.278098	77.082	2.53347e-15	2.07419	3.75915																									3.22	1.65	2.250*,b,c	0.452504	77.3792	5.83082e-05	0.879339	3.62066
			2.36	1.750*,b,c	0.314855	76.6097	5.70835e-06	0.795982	2.70402																										2.36	1.417*,b,c	0.418996	77.7026	0.0169854	0.147672	2.68566
			2.44	1.000*,b,c	0.31247	76.8661	0.0299425	0.0533083	1.94669																										2.44	.833b,c	0.410929	77.1658	0.690296	-0.411504	2.07817
			2.83	.500b,c	0.289763	77.9635	1	-0.377498	1.3775																										2.83	.583b,c	0.396581	75.4108	1	-0.618935	1.7856
			3.61	-.333b,c	0.315307	76.559	1	-1.28874	0.622075																										3.61	-.083b,c	0.455642	77.1958	1	-1.4636	1.29694
		3.61	1.65	3.250*,b,c	0.301626	73.6614	1.2879e-15	2.33489	4.16511																									3.61	1.65	2.333*,b,c	0.475342	77.9876	7.38741e-05	0.893855	3.77281
			2.36	2.083*,b,c	0.335817	77.9995	3.6947e-07	1.06638	3.10028																										2.36	1.500*,b,c	0.443562	75.9835	0.0171107	0.155638	2.84436
			2.44	1.333*,b,c	0.333583	77.98	0.00216801	0.323141	2.34353																										2.44	.917b,c	0.43595	74.8874	0.582804	-0.405252	2.23859
			2.83	.833b,c	0.312413	76.0919	0.140026	-0.113495	1.78016																										2.83	.667b,c	0.422453	72.253	1	-0.615867	1.9492
			3.22	.333b,c	0.315307	76.559	1	-0.622075	1.28874																										3.22	.083b,c	0.455642	77.1958	1	-1.29694	1.4636
	Based on estimated marginal means																																Based on estimated marginal means
	*. The mean difference is significant at the .05 level. a. Adjustment for multiple comparisons: Bonferroni. b. An estimate of the modified population marginal mean (I). c. An estimate of the modified population marginal mean (J). d. Dependent Variable: Daybasal.																																a. Adjustment for multiple comparisons: Bonferroni. *. The mean difference is significant at the .05 level. b. An estimate of the modified population marginal mean (I). c. An estimate of the modified population marginal mean (J). d. Dependent Variable: Day7.
	Univariate Testsa																																Univariate Testsa
	Surgery	Numerator df	Denominator df	F	Sig.																												Surgery	Numerator df	Denominator df	F	Sig.
	Endo	5	83.5933	78.8779	3.59024e-30																												Endo	5	67.5394	35.1046	1.60893e-17
	Sham	5	83.5933	35.348	2.89342e-19																												Sham	5	67.5394	7.5756	1.07007e-05
	Each F tests the simple effects of Filament within each level combination of the other effects shown. These tests are based on the linearly independent pairwise comparisons among the estimated marginal means.																																Each F tests the simple effects of Filament within each level combination of the other effects shown. These tests are based on the linearly independent pairwise comparisons among the estimated marginal means.
	a. Dependent Variable: Daybasal.																																a. Dependent Variable: Day7.
	9. Treatment * Filament																																9. Treatment * Filament
	Estimatesb																																Estimatesb
	Treatment	Filament	Mean	Std. Error	df	95% Confidence Interval																											Treatment	Filament	Mean	Std. Error	df	95% Confidence Interval
						Lower Bound	Upper Bound																															Lower Bound	Upper Bound
	7daysTHC	1.65	1.100a	0.20332	39	0.688746	1.51125																										7daysTHC	1.65	4.600a	0.365869	39	3.85996	5.34004
		2.36	2.300a	0.259794	39	1.77452	2.82548																											2.36	5.600a	0.314353	39	4.96416	6.23584
		2.44	2.900a	0.256316	39	2.38155	3.41845																											2.44	6.200a	0.301303	39	5.59056	6.80944
		2.83	3.500a	0.222008	39	3.05095	3.94905																											2.83	6.600a	0.277273	39	6.03916	7.16084
		3.22	3.800a	0.226864	39	3.34112	4.25888																											3.22	6.900a	0.334443	39	6.22353	7.57647
		3.61	4.400a	0.260451	39	3.87319	4.92681																											3.61	7.600a	0.370512	39	6.85057	8.34943
	AcuteTHC	1.65	1.222a	0.214318	39	0.788723	1.65572																										AcuteTHC	1.65	3.889a	0.38566	39	3.10882	4.66896
		2.36	2.111a	0.273847	39	1.5572	2.66502																											2.36	4.444a	0.331357	39	3.77421	5.11468
		2.44	2.778a	0.270181	39	2.23129	3.32427																											2.44	5.444a	0.317601	39	4.80204	6.08685
		2.83	3.111a	0.234017	39	2.63777	3.58446																											2.83	6.000a	0.292271	39	5.40883	6.59117
		3.22	3.778a	0.239136	39	3.29408	4.26148																											3.22	6.889a	0.352533	39	6.17582	7.60196
		3.61	4.111a	0.27454	39	3.5558	4.66642																											3.61	7.444a	0.390554	39	6.65447	8.23441
	Vehicle	1.65	1.08333	0.131243	39	0.81787	1.3488																										Vehicle	1.65	3.70833	0.236168	39	3.23064	4.18603
		2.36	2	0.167696	39	1.6608	2.3392																											2.36	4.54167	0.202914	39	4.13123	4.9521
		2.44	2.83333	0.165451	39	2.49868	3.16799																											2.44	5.20833	0.19449	39	4.81494	5.60173
		2.83	3.41667	0.143306	39	3.1268	3.70653																											2.83	5.625	0.178979	39	5.26298	5.98702
		3.22	3.95833	0.14644	39	3.66213	4.25454																											3.22	6.16667	0.215882	39	5.73	6.60333
		3.61	4.16667	0.16812	39	3.82661	4.50672																											3.61	6.45833	0.239165	39	5.97458	6.94209
	a. Based on modified population marginal mean. b. Dependent Variable: Daybasal.																																a. Based on modified population marginal mean. b. Dependent Variable: Day7.
	Pairwise Comparisonsd																																Pairwise Comparisonsd
	Filament	(I) Treatment	(J) Treatment	Mean Difference (I-J)	Std. Error	df	Sig.c	95% Confidence Interval for Differencec																									Filament	(I) Treatment	(J) Treatment	Mean Difference (I-J)	Std. Error	df	Sig.c	95% Confidence Interval for Differencec
								Lower Bound	Upper Bound																															Lower Bound	Upper Bound
	1.65	7daysTHC	AcuteTHC	-.122a,b	0.295417	39	1	-0.861255	0.61681																								1.65	7daysTHC	AcuteTHC	.711a,b	0.531596	39	0.566238	-0.61876	2.04098
			Vehicle	.017a	0.241999	39	1	-0.588733	0.622066																										Vehicle	.892a	0.435472	39	0.142133	-0.197734	1.98107
		AcuteTHC	7daysTHC	.122a,b	0.295417	39	1	-0.61681	0.861255																									AcuteTHC	7daysTHC	-.711a,b	0.531596	39	0.566238	-2.04098	0.61876
			Vehicle	.139a	0.25131	39	1	-0.489803	0.767581																										Vehicle	.181a	0.452227	39	1	-0.950761	1.31187
		Vehicle	7daysTHC	-.017b	0.241999	39	1	-0.622066	0.588733																									Vehicle	7daysTHC	-.892b	0.435472	39	0.142133	-1.98107	0.197734
			AcuteTHC	-.139b	0.25131	39	1	-0.767581	0.489803																										AcuteTHC	-.181b	0.452227	39	1	-1.31187	0.950761
	2.36	7daysTHC	AcuteTHC	.189a,b	0.377472	39	1	-0.755416	1.13319																								2.36	7daysTHC	AcuteTHC	1.156a,b,*	0.456744	39	0.0466715	0.0129384	2.29817
			Vehicle	.300a	0.309217	39	1	-0.473554	1.07355																										Vehicle	1.058a,*	0.374155	39	0.0220373	0.122326	1.99434
		AcuteTHC	7daysTHC	-.189a,b	0.377472	39	1	-1.13319	0.755416																									AcuteTHC	7daysTHC	-1.156a,b,*	0.456744	39	0.0466715	-2.29817	-0.0129384
			Vehicle	.111a	0.321114	39	1	-0.692206	0.914428																										Vehicle	-.097a	0.38855	39	1	-1.06924	0.874798
		Vehicle	7daysTHC	-.300b	0.309217	39	1	-1.07355	0.473554																									Vehicle	7daysTHC	-1.058b,*	0.374155	39	0.0220373	-1.99434	-0.122326
			AcuteTHC	-.111b	0.321114	39	1	-0.914428	0.692206																										AcuteTHC	.097b	0.38855	39	1	-0.874798	1.06924
	2.44	7daysTHC	AcuteTHC	.122a,b	0.372419	39	1	-0.809442	1.05389																								2.44	7daysTHC	AcuteTHC	.756a,b	0.437783	39	0.276862	-0.339628	1.85074
			Vehicle	.067a	0.305077	39	1	-0.696532	0.829866																										Vehicle	.992a,*	0.358622	39	0.0259351	0.0945165	1.88882
		AcuteTHC	7daysTHC	-.122a,b	0.372419	39	1	-1.05389	0.809442																									AcuteTHC	7daysTHC	-.756a,b	0.437783	39	0.276862	-1.85074	0.339628
			Vehicle	-.056a	0.316815	39	1	-0.848119	0.737008																										Vehicle	.236a	0.37242	39	1	-0.695557	1.16778
		Vehicle	7daysTHC	-.067b	0.305077	39	1	-0.829866	0.696532																									Vehicle	7daysTHC	-.992b,*	0.358622	39	0.0259351	-1.88882	-0.0945165
			AcuteTHC	.056b	0.316815	39	1	-0.737008	0.848119																										AcuteTHC	-.236b	0.37242	39	1	-1.16778	0.695557
	2.83	7daysTHC	AcuteTHC	.389a,b	0.322571	39	0.705716	-0.418073	1.19585																								2.83	7daysTHC	AcuteTHC	.600a,b	0.402868	39	0.433338	-0.407839	1.60784
			Vehicle	.083a	0.264243	39	1	-0.577712	0.744379																										Vehicle	.975a,*	0.330021	39	0.0158671	0.149401	1.8006
		AcuteTHC	7daysTHC	-.389a,b	0.322571	39	0.705716	-1.19585	0.418073																									AcuteTHC	7daysTHC	-.600a,b	0.402868	39	0.433338	-1.60784	0.407839
			Vehicle	-.306a	0.27441	39	0.816928	-0.992035	0.380924																										Vehicle	.375a	0.342719	39	0.841749	-0.482365	1.23236
		Vehicle	7daysTHC	-.083b	0.264243	39	1	-0.744379	0.577712																									Vehicle	7daysTHC	-.975b,*	0.330021	39	0.0158671	-1.8006	-0.149401
			AcuteTHC	.306b	0.27441	39	0.816928	-0.380924	0.992035																										AcuteTHC	-.375b	0.342719	39	0.841749	-1.23236	0.482365
	3.22	7daysTHC	AcuteTHC	.022a,b	0.329626	39	1	-0.802388	0.846833																								3.22	7daysTHC	AcuteTHC	.011a,b	0.485934	39	1	-1.20453	1.22675
			Vehicle	-.158a	0.270022	39	1	-0.833836	0.51717																										Vehicle	.733a	0.398066	39	0.219158	-0.262492	1.72916
		AcuteTHC	7daysTHC	-.022a,b	0.329626	39	1	-0.846833	0.802388																									AcuteTHC	7daysTHC	-.011a,b	0.485934	39	1	-1.22675	1.20453
			Vehicle	-.181a	0.280411	39	1	-0.882049	0.520938																										Vehicle	.722a	0.413382	39	0.265472	-0.311918	1.75636
		Vehicle	7daysTHC	.158b	0.270022	39	1	-0.51717	0.833836																									Vehicle	7daysTHC	-.733b	0.398066	39	0.219158	-1.72916	0.262492
			AcuteTHC	.181b	0.280411	39	1	-0.520938	0.882049																										AcuteTHC	-.722b	0.413382	39	0.265472	-1.75636	0.311918
	3.61	7daysTHC	AcuteTHC	.289a,b	0.378427	39	1	-0.657805	1.23558																								3.61	7daysTHC	AcuteTHC	.156a,b	0.538342	39	1	-1.19119	1.5023
			Vehicle	.233a	0.309999	39	1	-0.542178	1.00884																										Vehicle	1.142a,*	0.440998	39	0.0403958	0.0384416	2.24489
		AcuteTHC	7daysTHC	-.289a,b	0.378427	39	1	-1.23558	0.657805																									AcuteTHC	7daysTHC	-.156a,b	0.538342	39	1	-1.5023	1.19119
			Vehicle	-.056a	0.321926	39	1	-0.860905	0.749793																										Vehicle	.986a	0.457965	39	0.112626	-0.159561	2.13178
		Vehicle	7daysTHC	-.233b	0.309999	39	1	-1.00884	0.542178																									Vehicle	7daysTHC	-1.142b,*	0.440998	39	0.0403958	-2.24489	-0.0384416
			AcuteTHC	.056b	0.321926	39	1	-0.749793	0.860905																										AcuteTHC	-.986b	0.457965	39	0.112626	-2.13178	0.159561
	Based on estimated marginal means																																Based on estimated marginal means
	a. An estimate of the modified population marginal mean (I). b. An estimate of the modified population marginal mean (J). c. Adjustment for multiple comparisons: Bonferroni. d. Dependent Variable: Daybasal.																																a. An estimate of the modified population marginal mean (I). b. An estimate of the modified population marginal mean (J). c. Adjustment for multiple comparisons: Bonferroni. *. The mean difference is significant at the .05 level. d. Dependent Variable: Day7.
	Univariate Testsa																																Univariate Testsa
	Filament	Numerator df	Denominator df	F	Sig.																												Filament	Numerator df	Denominator df	F	Sig.
	1.65	2	39	0.156893	0.855333																												1.65	2	39	2.11405	0.134375
	2.36	2	39	0.473397	0.626415																												2.36	2	39	4.60133	0.0160647
	2.44	2	39	0.0544737	0.947055																												2.44	2	39	3.8353	0.0301589
	2.83	2	39	0.836201	0.440974																												2.83	2	39	4.40015	0.0189175
	3.22	2	39	0.296029	0.745422																												3.22	2	39	2.51313	0.0940546
	3.61	2	39	0.364162	0.697116																												3.61	2	39	4.44719	0.0182058
	Each F tests the simple effects of Treatment within each level combination of the other effects shown. These tests are based on the linearly independent pairwise comparisons among the estimated marginal means.																																Each F tests the simple effects of Treatment within each level combination of the other effects shown. These tests are based on the linearly independent pairwise comparisons among the estimated marginal means.
	a. Dependent Variable: Daybasal.																																a. Dependent Variable: Day7.
	10. Treatment * Filament																																10. Treatment * Filament
	Estimatesb																																Estimatesb
	Treatment	Filament	Mean	Std. Error	df	95% Confidence Interval																											Treatment	Filament	Mean	Std. Error	df	95% Confidence Interval
						Lower Bound	Upper Bound																															Lower Bound	Upper Bound
	7daysTHC	1.65	1.100a	0.20332	39	0.688746	1.51125																										7daysTHC	1.65	4.600a	0.365869	39	3.85996	5.34004
		2.36	2.300a	0.259794	39	1.77452	2.82548																											2.36	5.600a	0.314353	39	4.96416	6.23584
		2.44	2.900a	0.256316	39	2.38155	3.41845																											2.44	6.200a	0.301303	39	5.59056	6.80944
		2.83	3.500a	0.222008	39	3.05095	3.94905																											2.83	6.600a	0.277273	39	6.03916	7.16084
		3.22	3.800a	0.226864	39	3.34112	4.25888																											3.22	6.900a	0.334443	39	6.22353	7.57647
		3.61	4.400a	0.260451	39	3.87319	4.92681																											3.61	7.600a	0.370512	39	6.85057	8.34943
	AcuteTHC	1.65	1.222a	0.214318	39	0.788723	1.65572																										AcuteTHC	1.65	3.889a	0.38566	39	3.10882	4.66896
		2.36	2.111a	0.273847	39	1.5572	2.66502																											2.36	4.444a	0.331357	39	3.77421	5.11468
		2.44	2.778a	0.270181	39	2.23129	3.32427																											2.44	5.444a	0.317601	39	4.80204	6.08685
		2.83	3.111a	0.234017	39	2.63777	3.58446																											2.83	6.000a	0.292271	39	5.40883	6.59117
		3.22	3.778a	0.239136	39	3.29408	4.26148																											3.22	6.889a	0.352533	39	6.17582	7.60196
		3.61	4.111a	0.27454	39	3.5558	4.66642																											3.61	7.444a	0.390554	39	6.65447	8.23441
	Vehicle	1.65	1.08333	0.131243	39	0.81787	1.3488																										Vehicle	1.65	3.70833	0.236168	39	3.23064	4.18603
		2.36	2	0.167696	39	1.6608	2.3392																											2.36	4.54167	0.202914	39	4.13123	4.9521
		2.44	2.83333	0.165451	39	2.49868	3.16799																											2.44	5.20833	0.19449	39	4.81494	5.60173
		2.83	3.41667	0.143306	39	3.1268	3.70653																											2.83	5.625	0.178979	39	5.26298	5.98702
		3.22	3.95833	0.14644	39	3.66213	4.25454																											3.22	6.16667	0.215882	39	5.73	6.60333
		3.61	4.16667	0.16812	39	3.82661	4.50672																											3.61	6.45833	0.239165	39	5.97458	6.94209
	a. Based on modified population marginal mean. b. Dependent Variable: Daybasal.																																a. Based on modified population marginal mean. b. Dependent Variable: Day7.
	Pairwise Comparisonsd																																Pairwise Comparisonsd
	Treatment	(I) Filament	(J) Filament	Mean Difference (I-J)	Std. Error	df	Sig.c	95% Confidence Interval for Differencec																									Treatment	(I) Filament	(J) Filament	Mean Difference (I-J)	Std. Error	df	Sig.c	95% Confidence Interval for Differencec
								Lower Bound	Upper Bound																															Lower Bound	Upper Bound
	7daysTHC	1.65	2.36	-1.200*,a,b	0.329897	73.7414	0.00760994	-2.20085	-0.19915																								7daysTHC	1.65	2.36	-1.000a,b	0.482367	76.27	0.623094	-2.4618	0.461795
			2.44	-1.800*,a,b	0.327165	74.1593	7.67802e-06	-2.79238	-0.807625																										2.44	-1.600a,b,*	0.473966	75.2336	0.0175076	-3.03698	-0.163023
			2.83	-2.400*,a,b	0.301043	77.4045	1.67192e-10	-3.31187	-1.48813																										2.83	-2.000a,b,*	0.459065	72.6863	0.000639457	-3.3934	-0.606598
			3.22	-2.700*,a,b	0.304641	77.082	3.27854e-12	-3.62289	-1.77711																										3.22	-2.300a,b,*	0.495694	77.3792	0.00020936	-3.80148	-0.798516
			3.61	-3.300*,a,b	0.330415	73.6614	3.66363e-14	-4.30246	-2.29754																										3.61	-3.000a,b,*	0.520711	77.9876	2.37656e-06	-4.57687	-1.42313
		2.36	1.65	1.200*,a,b	0.329897	73.7414	0.00760994	0.19915	2.20085																									2.36	1.65	1.000a,b	0.482367	76.27	0.623094	-0.461795	2.4618
			2.44	-.600a,b	0.364953	77.9858	1	-1.70519	0.50519																										2.44	-.600a,b	0.435432	77.8602	1	-1.91869	0.718689
			2.83	-1.200*,a,b	0.341732	76.1494	0.0112881	-2.23566	-0.164342																										2.83	-1.000a,b	0.419163	76.8027	0.292661	-2.26997	0.269974
			3.22	-1.500*,a,b	0.344906	76.6097	0.000624324	-2.54507	-0.454926																										3.22	-1.300a,b	0.458987	77.7026	0.0882427	-2.69011	0.0901144
			3.61	-2.100*,a,b	0.367869	77.9995	2.95737e-06	-3.21401	-0.985986																										3.61	-2.000a,b,*	0.485898	75.9835	0.0014539	-3.47267	-0.527325
		2.44	1.65	1.800*,a,b	0.327165	74.1593	7.67802e-06	0.807625	2.79238																									2.44	1.65	1.600a,b,*	0.473966	75.2336	0.0175076	0.163023	3.03698
			2.36	.600a,b	0.364953	77.9858	1	-0.50519	1.70519																										2.36	.600a,b	0.435432	77.8602	1	-0.718689	1.91869
			2.83	-.600a,b	0.339095	76.443	1	-1.62754	0.427541																										2.83	-.400a,b	0.409468	77.4673	1	-1.64026	0.840256
			3.22	-.900a,b	0.342294	76.8661	0.154933	-1.93705	0.137049																										3.22	-.700a,b	0.45015	77.1658	1	-2.06365	0.663651
			3.61	-1.500*,a,b	0.365421	77.98	0.00148206	-2.60661	-0.39339																										3.61	-1.400a,b	0.477559	74.8874	0.0670568	-2.84809	0.0480896
		2.83	1.65	2.400*,a,b	0.301043	77.4045	1.67192e-10	1.48813	3.31187																									2.83	1.65	2.000a,b,*	0.459065	72.6863	0.000639457	0.606598	3.3934
			2.36	1.200*,a,b	0.341732	76.1494	0.0112881	0.164342	2.23566																										2.36	1.000a,b	0.419163	76.8027	0.292661	-0.269974	2.26997
			2.44	.600a,b	0.339095	76.443	1	-0.427541	1.62754																										2.44	.400a,b	0.409468	77.4673	1	-0.840256	1.64026
			3.22	-.300a,b	0.317419	77.9635	1	-1.26125	0.661251																										3.22	-.300a,b	0.434433	75.4108	1	-1.61702	1.01702
			3.61	-.900a,b	0.342232	76.0919	0.155014	-1.9372	0.137198																										3.61	-1.000a,b	0.462774	72.253	0.510301	-2.40495	0.404945
		3.22	1.65	2.700*,a,b	0.304641	77.082	3.27854e-12	1.77711	3.62289																									3.22	1.65	2.300a,b,*	0.495694	77.3792	0.00020936	0.798516	3.80148
			2.36	1.500*,a,b	0.344906	76.6097	0.000624324	0.454926	2.54507																										2.36	1.300a,b	0.458987	77.7026	0.0882427	-0.0901144	2.69011
			2.44	.900a,b	0.342294	76.8661	0.154933	-0.137049	1.93705																										2.44	.700a,b	0.45015	77.1658	1	-0.663651	2.06365
			2.83	.300a,b	0.317419	77.9635	1	-0.661251	1.26125																										2.83	.300a,b	0.434433	75.4108	1	-1.01702	1.61702
			3.61	-.600a,b	0.345401	76.559	1	-1.6466	0.446597																										3.61	-.700a,b	0.49913	77.1958	1	-2.21201	0.812008
		3.61	1.65	3.300*,a,b	0.330415	73.6614	3.66363e-14	2.29754	4.30246																									3.61	1.65	3.000a,b,*	0.520711	77.9876	2.37656e-06	1.42313	4.57687
			2.36	2.100*,a,b	0.367869	77.9995	2.95737e-06	0.985986	3.21401																										2.36	2.000a,b,*	0.485898	75.9835	0.0014539	0.527325	3.47267
			2.44	1.500*,a,b	0.365421	77.98	0.00148206	0.39339	2.60661																										2.44	1.400a,b	0.477559	74.8874	0.0670568	-0.0480896	2.84809
			2.83	.900a,b	0.342232	76.0919	0.155014	-0.137198	1.9372																										2.83	1.000a,b	0.462774	72.253	0.510301	-0.404945	2.40495
			3.22	.600a,b	0.345401	76.559	1	-0.446597	1.6466																										3.22	.700a,b	0.49913	77.1958	1	-0.812008	2.21201
	AcuteTHC	1.65	2.36	-.889a,b	0.347742	73.7414	0.189624	-1.94388	0.1661																								AcuteTHC	1.65	2.36	-.556a,b	0.50846	76.27	1	-2.09642	0.985312
			2.44	-1.556*,a,b	0.344862	74.1593	0.000356487	-2.60161	-0.5095																										2.44	-1.556a,b,*	0.499604	75.2336	0.0392122	-3.07026	-0.0408492
			2.83	-1.889*,a,b	0.317327	77.4045	1.09038e-06	-2.85008	-0.927698																										2.83	-2.111a,b,*	0.483897	72.6863	0.000625617	-3.57989	-0.642336
			3.22	-2.556*,a,b	0.32112	77.082	1.82422e-10	-3.52837	-1.58275																										3.22	-3.000a,b,*	0.522507	77.3792	2.62742e-06	-4.5827	-1.4173
			3.61	-2.889*,a,b	0.348288	73.6614	5.55486e-11	-3.94557	-1.83221																										3.61	-3.556a,b,*	0.548877	77.9876	1.14343e-07	-5.21772	-1.89339
		2.36	1.65	.889a,b	0.347742	73.7414	0.189624	-0.1661	1.94388																									2.36	1.65	.556a,b	0.50846	76.27	1	-0.985312	2.09642
			2.44	-.667a,b	0.384695	77.9858	1	-1.83164	0.498306																										2.44	-1.000a,b	0.458986	77.8602	0.485665	-2.39002	0.39002
			2.83	-1.000a,b	0.360217	76.1494	0.103802	-2.09168	0.0916796																										2.83	-1.556a,b,*	0.441837	76.8027	0.0109148	-2.89423	-0.216886
			3.22	-1.667*,a,b	0.363563	76.6097	0.00026126	-2.76827	-0.565062																										3.22	-2.444a,b,*	0.483815	77.7026	4.23156e-05	-3.90975	-0.979135
			3.61	-2.000*,a,b	0.387768	77.9995	2.77219e-05	-3.17427	-0.825727																										3.61	-3.000a,b,*	0.512181	75.9835	1.69947e-06	-4.55234	-1.44766
		2.44	1.65	1.556*,a,b	0.344862	74.1593	0.000356487	0.5095	2.60161																									2.44	1.65	1.556a,b,*	0.499604	75.2336	0.0392122	0.0408492	3.07026
			2.36	.667a,b	0.384695	77.9858	1	-0.498306	1.83164																										2.36	1.000a,b	0.458986	77.8602	0.485665	-0.39002	2.39002
			2.83	-.333a,b	0.357438	76.443	1	-1.41646	0.74979																										2.83	-.556a,b	0.431617	77.4673	1	-1.8629	0.751789
			3.22	-1.000a,b	0.36081	76.8661	0.104919	-2.09315	0.0931454																										3.22	-1.444a,b,*	0.4745	77.1658	0.0478557	-2.88186	-0.00703016
			3.61	-1.333*,a,b	0.385188	77.98	0.0131196	-2.4998	-0.166864																										3.61	-2.000a,b,*	0.503391	74.8874	0.00242677	-3.52642	-0.47358
		2.83	1.65	1.889*,a,b	0.317327	77.4045	1.09038e-06	0.927698	2.85008																									2.83	1.65	2.111a,b,*	0.483897	72.6863	0.000625617	0.642336	3.57989
			2.36	1.000a,b	0.360217	76.1494	0.103802	-0.0916796	2.09168																										2.36	1.556a,b,*	0.441837	76.8027	0.0109148	0.216886	2.89423
			2.44	.333a,b	0.357438	76.443	1	-0.74979	1.41646																										2.44	.556a,b	0.431617	77.4673	1	-0.751789	1.8629
			3.22	-.667a,b	0.334589	77.9635	0.747258	-1.67991	0.346581																										3.22	-.889a,b	0.457933	75.4108	0.839763	-2.27715	0.499371
			3.61	-1.000a,b	0.360744	76.0919	0.104999	-2.0933	0.0933031																										3.61	-1.444a,b	0.487806	72.253	0.0621792	-2.92539	0.0364981
		3.22	1.65	2.556*,a,b	0.32112	77.082	1.82422e-10	1.58275	3.52837																									3.22	1.65	3.000a,b,*	0.522507	77.3792	2.62742e-06	1.4173	4.5827
			2.36	1.667*,a,b	0.363563	76.6097	0.00026126	0.565062	2.76827																										2.36	2.444a,b,*	0.483815	77.7026	4.23156e-05	0.979135	3.90975
			2.44	1.000a,b	0.36081	76.8661	0.104919	-0.0931454	2.09315																										2.44	1.444a,b,*	0.4745	77.1658	0.0478557	0.00703016	2.88186
			2.83	.667a,b	0.334589	77.9635	0.747258	-0.346581	1.67991																										2.83	.889a,b	0.457933	75.4108	0.839763	-0.499371	2.27715
			3.61	-.333a,b	0.364085	76.559	1	-1.43654	0.769877																										3.61	-.556a,b	0.52613	77.1958	1	-2.14935	1.03824
		3.61	1.65	2.889*,a,b	0.348288	73.6614	5.55486e-11	1.83221	3.94557																									3.61	1.65	3.556a,b,*	0.548877	77.9876	1.14343e-07	1.89339	5.21772
			2.36	2.000*,a,b	0.387768	77.9995	2.77219e-05	0.825727	3.17427																										2.36	3.000a,b,*	0.512181	75.9835	1.69947e-06	1.44766	4.55234
			2.44	1.333*,a,b	0.385188	77.98	0.0131196	0.166864	2.4998																										2.44	2.000a,b,*	0.503391	74.8874	0.00242677	0.47358	3.52642
			2.83	1.000a,b	0.360744	76.0919	0.104999	-0.0933031	2.0933																										2.83	1.444a,b	0.487806	72.253	0.0621792	-0.0364981	2.92539
			3.22	.333a,b	0.364085	76.559	1	-0.769877	1.43654																										3.22	.556a,b	0.52613	77.1958	1	-1.03824	2.14935
	Vehicle	1.65	2.36	-.917*	0.212947	73.7414	0.000760774	-1.56271	-0.270621																								Vehicle	1.65	2.36	-0.833333	0.311367	76.27	0.136592	-1.77692	0.110251
			2.44	-1.750*	0.211184	74.1593	5.49561e-11	-2.39058	-1.10942																										2.44	-1.500*	0.305944	75.2336	7.95515e-05	-2.42756	-0.572436
			2.83	-2.333*	0.194322	77.4045	3.50298e-18	-2.92194	-1.74473																										2.83	-1.917*	0.296325	72.6863	1.51118e-07	-2.8161	-1.01723
			3.22	-2.875*	0.196645	77.082	9.37092e-23	-3.47072	-2.27928																										3.22	-2.458*	0.319969	77.3792	6.04341e-10	-3.42754	-1.48913
			3.61	-3.083*	0.213282	73.6614	4.97437e-22	-3.73042	-2.43625																										3.61	-2.750*	0.336117	77.9876	6.28134e-11	-3.76786	-1.73214
		2.36	1.65	.917*	0.212947	73.7414	0.000760774	0.270621	1.56271																									2.36	1.65	0.833333	0.311367	76.27	0.136592	-0.110251	1.77692
			2.44	-.833*	0.235576	77.9858	0.0102606	-1.54673	-0.119936																										2.44	-0.666667	0.28107	77.8602	0.302516	-1.51788	0.184543
			2.83	-1.417*	0.220587	76.1494	1.56966e-07	-2.08518	-0.748152																										2.83	-1.083*	0.270569	76.8027	0.00213984	-1.9031	-0.263569
			3.22	-1.958*	0.222636	76.6097	4.62538e-12	-2.63293	-1.28374																										3.22	-1.625*	0.296275	77.7026	7.47715e-06	-2.52232	-0.727685
			3.61	-2.167*	0.237458	77.9995	9.28798e-13	-2.88576	-1.44757																										3.61	-1.917*	0.313646	75.9835	5.8982e-07	-2.86727	-0.966059
		2.44	1.65	1.750*	0.211184	74.1593	5.49561e-11	1.10942	2.39058																									2.44	1.65	1.500*	0.305944	75.2336	7.95515e-05	0.572436	2.42756
			2.36	.833*	0.235576	77.9858	0.0102606	0.119936	1.54673																										2.36	0.666667	0.28107	77.8602	0.302516	-0.184543	1.51788
			2.83	-0.583333	0.218885	76.443	0.140814	-1.24661	0.0799413																										2.83	-0.416667	0.26431	77.4673	1	-1.21725	0.383915
			3.22	-1.125*	0.22095	76.8661	3.68798e-05	-1.79441	-0.455588																										3.22	-.958*	0.290571	77.1658	0.0221075	-1.83857	-0.0781004
			3.61	-1.333*	0.235878	77.98	3.72851e-06	-2.04765	-0.61902																										3.61	-1.250*	0.308263	74.8874	0.0018241	-2.18474	-0.315262
		2.83	1.65	2.333*	0.194322	77.4045	3.50298e-18	1.74473	2.92194																									2.83	1.65	1.917*	0.296325	72.6863	1.51118e-07	1.01723	2.8161
			2.36	1.417*	0.220587	76.1494	1.56966e-07	0.748152	2.08518																										2.36	1.083*	0.270569	76.8027	0.00213984	0.263569	1.9031
			2.44	0.583333	0.218885	76.443	0.140814	-0.0799413	1.24661																										2.44	0.416667	0.26431	77.4673	1	-0.383915	1.21725
			3.22	-0.541667	0.204893	77.9635	0.148674	-1.16215	0.0788182																										3.22	-0.541667	0.280425	75.4108	0.857515	-1.3918	0.308465
			3.61	-.750*	0.22091	76.0919	0.0163937	-1.41951	-0.0804913																										3.61	-0.833333	0.298719	72.253	0.101123	-1.74022	0.0735551
		3.22	1.65	2.875*	0.196645	77.082	9.37092e-23	2.27928	3.47072																									3.22	1.65	2.458*	0.319969	77.3792	6.04341e-10	1.48913	3.42754
			2.36	1.958*	0.222636	76.6097	4.62538e-12	1.28374	2.63293																										2.36	1.625*	0.296275	77.7026	7.47715e-06	0.727685	2.52232
			2.44	1.125*	0.22095	76.8661	3.68798e-05	0.455588	1.79441																										2.44	.958*	0.290571	77.1658	0.0221075	0.0781004	1.83857
			2.83	0.541667	0.204893	77.9635	0.148674	-0.0788182	1.16215																										2.83	0.541667	0.280425	75.4108	0.857515	-0.308465	1.3918
			3.61	-0.208333	0.222956	76.559	1	-0.883909	0.467242																										3.61	-0.291667	0.322187	77.1958	1	-1.26766	0.68433
		3.61	1.65	3.083*	0.213282	73.6614	4.97437e-22	2.43625	3.73042																									3.61	1.65	2.750*	0.336117	77.9876	6.28134e-11	1.73214	3.76786
			2.36	2.167*	0.237458	77.9995	9.28798e-13	1.44757	2.88576																										2.36	1.917*	0.313646	75.9835	5.8982e-07	0.966059	2.86727
			2.44	1.333*	0.235878	77.98	3.72851e-06	0.61902	2.04765																										2.44	1.250*	0.308263	74.8874	0.0018241	0.315262	2.18474
			2.83	.750*	0.22091	76.0919	0.0163937	0.0804913	1.41951																										2.83	0.833333	0.298719	72.253	0.101123	-0.0735551	1.74022
			3.22	0.208333	0.222956	76.559	1	-0.467242	0.883909																										3.22	0.291667	0.322187	77.1958	1	-0.68433	1.26766
	Based on estimated marginal means																																Based on estimated marginal means
	*. The mean difference is significant at the .05 level. a. An estimate of the modified population marginal mean (I). b. An estimate of the modified population marginal mean (J). c. Adjustment for multiple comparisons: Bonferroni. d. Dependent Variable: Daybasal.																																a. An estimate of the modified population marginal mean (I). b. An estimate of the modified population marginal mean (J). c. Adjustment for multiple comparisons: Bonferroni. *. The mean difference is significant at the .05 level. d. Dependent Variable: Day7.
	Univariate Testsa																																Univariate Testsa
	Treatment	Numerator df	Denominator df	F	Sig.																												Treatment	Numerator df	Denominator df	F	Sig.
	7daysTHC	5	83.5933	27.9834	1.50911e-16																												7daysTHC	5	67.5394	8.65569	2.22289e-06
	AcuteTHC	5	83.5933	20.3374	3.17327e-13																												AcuteTHC	5	67.5394	13.8769	2.53156e-09
	Vehicle	5	83.5933	68.1877	4.90486e-28																												Vehicle	5	67.5394	20.4961	2.16565e-12
	Each F tests the simple effects of Filament within each level combination of the other effects shown. These tests are based on the linearly independent pairwise comparisons among the estimated marginal means.																																Each F tests the simple effects of Filament within each level combination of the other effects shown. These tests are based on the linearly independent pairwise comparisons among the estimated marginal means.
	a. Dependent Variable: Daybasal.																																a. Dependent Variable: Day7.
	11. Surgery * Treatment * Filament																																11. Surgery * Treatment * Filament
	Estimatesb																																Estimatesb
	Surgery	Treatment	Filament	Mean	Std. Error	df	95% Confidence Interval																										Surgery	Treatment	Filament	Mean	Std. Error	df	95% Confidence Interval
							Lower Bound	Upper Bound																															Lower Bound	Upper Bound
	Endo	7daysTHC	1.65	1.1	0.20332	39	0.688746	1.51125																									Endo	7daysTHC	1.65	4.6	0.365869	39	3.85996	5.34004
			2.36	2.3	0.259794	39	1.77452	2.82548																											2.36	5.6	0.314353	39	4.96416	6.23584
			2.44	2.9	0.256316	39	2.38155	3.41845																											2.44	6.2	0.301303	39	5.59056	6.80944
			2.83	3.5	0.222008	39	3.05095	3.94905																											2.83	6.6	0.277273	39	6.03916	7.16084
			3.22	3.8	0.226864	39	3.34112	4.25888																											3.22	6.9	0.334443	39	6.22353	7.57647
			3.61	4.4	0.260451	39	3.87319	4.92681																											3.61	7.6	0.370512	39	6.85057	8.34943
		AcuteTHC	1.65	1.22222	0.214318	39	0.788723	1.65572																										AcuteTHC	1.65	3.88889	0.38566	39	3.10882	4.66896
			2.36	2.11111	0.273847	39	1.5572	2.66502																											2.36	4.44444	0.331357	39	3.77421	5.11468
			2.44	2.77778	0.270181	39	2.23129	3.32427																											2.44	5.44444	0.317601	39	4.80204	6.08685
			2.83	3.11111	0.234017	39	2.63777	3.58446																											2.83	6	0.292271	39	5.40883	6.59117
			3.22	3.77778	0.239136	39	3.29408	4.26148																											3.22	6.88889	0.352533	39	6.17582	7.60196
			3.61	4.11111	0.27454	39	3.5558	4.66642																											3.61	7.44444	0.390554	39	6.65447	8.23441
		Vehicle	1.65	1.16667	0.185605	39	0.791245	1.54209																										Vehicle	1.65	4.75	0.333992	39	4.07444	5.42556
			2.36	1.83333	0.237158	39	1.35364	2.31303																											2.36	5.58333	0.286964	39	5.00289	6.16377
			2.44	2.75	0.233984	39	2.27672	3.22328																											2.44	6.33333	0.275051	39	5.77699	6.88968
			2.83	3.41667	0.202665	39	3.00674	3.8266																											2.83	6.91667	0.253115	39	6.40469	7.42864
			3.22	4	0.207097	39	3.58111	4.41889																											3.22	7.41667	0.305303	39	6.79913	8.0342
			3.61	4.08333	0.237758	39	3.60242	4.56424																											3.61	7.91667	0.33823	39	7.23253	8.6008
	Sham	7daysTHC	1.65	.a	.	.	.	.																									Sham	7daysTHC	1.65	.a	.	.	.	.
			2.36	.a	.	.	.	.																											2.36	.a	.	.	.	.
			2.44	.a	.	.	.	.																											2.44	.a	.	.	.	.
			2.83	.a	.	.	.	.																											2.83	.a	.	.	.	.
			3.22	.a	.	.	.	.																											3.22	.a	.	.	.	.
			3.61	.a	.	.	.	.																											3.61	.a	.	.	.	.
		AcuteTHC	1.65	.a	.	.	.	.																										AcuteTHC	1.65	.a	.	.	.	.
			2.36	.a	.	.	.	.																											2.36	.a	.	.	.	.
			2.44	.a	.	.	.	.																											2.44	.a	.	.	.	.
			2.83	.a	.	.	.	.																											2.83	.a	.	.	.	.
			3.22	.a	.	.	.	.																											3.22	.a	.	.	.	.
			3.61	.a	.	.	.	.																											3.61	.a	.	.	.	.
		Vehicle	1.65	1	0.185605	39	0.624579	1.37542																										Vehicle	1.65	2.66667	0.333992	39	1.99111	3.34223
			2.36	2.16667	0.237158	39	1.68697	2.64636																											2.36	3.5	0.286964	39	2.91956	4.08044
			2.44	2.91667	0.233984	39	2.44339	3.38994																											2.44	4.08333	0.275051	39	3.52699	4.63968
			2.83	3.41667	0.202665	39	3.00674	3.8266																											2.83	4.33333	0.253115	39	3.82136	4.84531
			3.22	3.91667	0.207097	39	3.49777	4.33556																											3.22	4.91667	0.305303	39	4.29913	5.5342
			3.61	4.25	0.237758	39	3.76909	4.73091																											3.61	5	0.33823	39	4.31587	5.68413
	a. This level combination of factors is not observed, thus the corresponding population marginal mean is not estimable. b. Dependent Variable: Daybasal.																																a. This level combination of factors is not observed, thus the corresponding population marginal mean is not estimable. b. Dependent Variable: Day7.
	Pairwise Comparisonsd																																Pairwise Comparisonsd
	Treatment	Filament	(I) Surgery	(J) Surgery	Mean Difference (I-J)	Std. Error	df	Sig.b	95% Confidence Interval for Differenceb																								Treatment	Filament	(I) Surgery	(J) Surgery	Mean Difference (I-J)	Std. Error	df	Sig.b	95% Confidence Interval for Differenceb
									Lower Bound	Upper Bound																															Lower Bound	Upper Bound
	7daysTHC	1.65	Endo	Sham	.a	.	.	.	.	.																							7daysTHC	1.65	Endo	Sham	.a	.	.	.	.	.
			Sham	Endo	.c	.	.	.	.	.																									Sham	Endo	.c	.	.	.	.	.
		2.36	Endo	Sham	.a	.	.	.	.	.																								2.36	Endo	Sham	.a	.	.	.	.	.
			Sham	Endo	.c	.	.	.	.	.																									Sham	Endo	.c	.	.	.	.	.
		2.44	Endo	Sham	.a	.	.	.	.	.																								2.44	Endo	Sham	.a	.	.	.	.	.
			Sham	Endo	.c	.	.	.	.	.																									Sham	Endo	.c	.	.	.	.	.
		2.83	Endo	Sham	.a	.	.	.	.	.																								2.83	Endo	Sham	.a	.	.	.	.	.
			Sham	Endo	.c	.	.	.	.	.																									Sham	Endo	.c	.	.	.	.	.
		3.22	Endo	Sham	.a	.	.	.	.	.																								3.22	Endo	Sham	.a	.	.	.	.	.
			Sham	Endo	.c	.	.	.	.	.																									Sham	Endo	.c	.	.	.	.	.
		3.61	Endo	Sham	.a	.	.	.	.	.																								3.61	Endo	Sham	.a	.	.	.	.	.
			Sham	Endo	.c	.	.	.	.	.																									Sham	Endo	.c	.	.	.	.	.
	AcuteTHC	1.65	Endo	Sham	.a	.	.	.	.	.																							AcuteTHC	1.65	Endo	Sham	.a	.	.	.	.	.
			Sham	Endo	.c	.	.	.	.	.																									Sham	Endo	.c	.	.	.	.	.
		2.36	Endo	Sham	.a	.	.	.	.	.																								2.36	Endo	Sham	.a	.	.	.	.	.
			Sham	Endo	.c	.	.	.	.	.																									Sham	Endo	.c	.	.	.	.	.
		2.44	Endo	Sham	.a	.	.	.	.	.																								2.44	Endo	Sham	.a	.	.	.	.	.
			Sham	Endo	.c	.	.	.	.	.																									Sham	Endo	.c	.	.	.	.	.
		2.83	Endo	Sham	.a	.	.	.	.	.																								2.83	Endo	Sham	.a	.	.	.	.	.
			Sham	Endo	.c	.	.	.	.	.																									Sham	Endo	.c	.	.	.	.	.
		3.22	Endo	Sham	.a	.	.	.	.	.																								3.22	Endo	Sham	.a	.	.	.	.	.
			Sham	Endo	.c	.	.	.	.	.																									Sham	Endo	.c	.	.	.	.	.
		3.61	Endo	Sham	.a	.	.	.	.	.																								3.61	Endo	Sham	.a	.	.	.	.	.
			Sham	Endo	.c	.	.	.	.	.																									Sham	Endo	.c	.	.	.	.	.
	Vehicle	1.65	Endo	Sham	0.166667	0.262485	39	0.529164	-0.364259	0.697593																							Vehicle	1.65	Endo	Sham	2.083*	0.472335	39	7.87332e-05	1.12794	3.03872
			Sham	Endo	-0.166667	0.262485	39	0.529164	-0.697593	0.364259																									Sham	Endo	-2.083*	0.472335	39	7.87332e-05	-3.03872	-1.12794
		2.36	Endo	Sham	-0.333333	0.335393	39	0.326417	-1.01173	0.345062																								2.36	Endo	Sham	2.083*	0.405828	39	8.21057e-06	1.26247	2.9042
			Sham	Endo	0.333333	0.335393	39	0.326417	-0.345062	1.01173																									Sham	Endo	-2.083*	0.405828	39	8.21057e-06	-2.9042	-1.26247
		2.44	Endo	Sham	-0.166667	0.330903	39	0.617325	-0.835981	0.502647																								2.44	Endo	Sham	2.250*	0.38898	39	1.03228e-06	1.46321	3.03679
			Sham	Endo	0.166667	0.330903	39	0.617325	-0.502647	0.835981																									Sham	Endo	-2.250*	0.38898	39	1.03228e-06	-3.03679	-1.46321
		2.83	Endo	Sham	1.91791e-14	0.286612	39	1	-0.579727	0.579727																								2.83	Endo	Sham	2.583*	0.357958	39	1.08169e-08	1.8593	3.30737
			Sham	Endo	-1.91791e-14	0.286612	39	1	-0.579727	0.579727																									Sham	Endo	-2.583*	0.357958	39	1.08169e-08	-3.30737	-1.8593
		3.22	Endo	Sham	0.0833333	0.29288	39	0.777509	-0.509072	0.675739																								3.22	Endo	Sham	2.500*	0.431764	39	1.01314e-06	1.62668	3.37332
			Sham	Endo	-0.0833333	0.29288	39	0.777509	-0.675739	0.509072																									Sham	Endo	-2.500*	0.431764	39	1.01314e-06	-3.37332	-1.62668
		3.61	Endo	Sham	-0.166667	0.336241	39	0.622904	-0.846778	0.513445																								3.61	Endo	Sham	2.917*	0.478329	39	3.79001e-07	1.94915	3.88418
			Sham	Endo	0.166667	0.336241	39	0.622904	-0.513445	0.846778																									Sham	Endo	-2.917*	0.478329	39	3.79001e-07	-3.88418	-1.94915
	Based on estimated marginal means																																Based on estimated marginal means
	a. The level combination of factors in (J) is not observed. b. Adjustment for multiple comparisons: Bonferroni. c. The level combination of factors in (I) is not observed. d. Dependent Variable: Daybasal.																																a. The level combination of factors in (J) is not observed. b. Adjustment for multiple comparisons: Bonferroni. c. The level combination of factors in (I) is not observed. *. The mean difference is significant at the .05 level. d. Dependent Variable: Day7.
	Univariate Testsa																																Univariate Testsa
	Treatment	Filament	Numerator df	Denominator df	F	Sig.																											Treatment	Filament	Numerator df	Denominator df	F	Sig.
	7daysTHC	1.65	0	.	.	.																											7daysTHC	1.65	0	.	.	.
		2.36	0	.	.	.																												2.36	0	.	.	.
		2.44	0	.	.	.																												2.44	0	.	.	.
		2.83	0	.	.	.																												2.83	0	.	.	.
		3.22	0	.	.	.																												3.22	0	.	.	.
		3.61	0	.	.	.																												3.61	0	.	.	.
	AcuteTHC	1.65	0	.	.	.																											AcuteTHC	1.65	0	.	.	.
		2.36	0	.	.	.																												2.36	0	.	.	.
		2.44	0	.	.	.																												2.44	0	.	.	.
		2.83	0	.	.	.																												2.83	0	.	.	.
		3.22	0	.	.	.																												3.22	0	.	.	.
		3.61	0	.	.	.																												3.61	0	.	.	.
	Vehicle	1.65	1	39	0.40317	0.529164																											Vehicle	1.65	1	39	19.4543	7.87332e-05
		2.36	1	39	0.987759	0.326417																												2.36	1	39	26.3533	8.21057e-06
		2.44	1	39	0.253686	0.617325																												2.44	1	39	33.4587	1.03228e-06
		2.83	1	39	4.47784e-27	1																												2.83	1	39	52.0831	1.08169e-08
		3.22	1	39	0.0809577	0.777509																												3.22	1	39	33.5265	1.01314e-06
		3.61	1	39	0.245695	0.622904																												3.61	1	39	37.1809	3.79001e-07
	Each F tests the simple effects of Surgery within each level combination of the other effects shown. These tests are based on the estimable linearly independent pairwise comparisons among the estimated marginal means.																																Each F tests the simple effects of Surgery within each level combination of the other effects shown. These tests are based on the estimable linearly independent pairwise comparisons among the estimated marginal means.
	a. Dependent Variable: Daybasal.																																a. Dependent Variable: Day7.
	12. Surgery * Treatment * Filament																																12. Surgery * Treatment * Filament
	Estimatesb																																Estimatesb
	Surgery	Treatment	Filament	Mean	Std. Error	df	95% Confidence Interval																										Surgery	Treatment	Filament	Mean	Std. Error	df	95% Confidence Interval
							Lower Bound	Upper Bound																															Lower Bound	Upper Bound
	Endo	7daysTHC	1.65	1.1	0.20332	39	0.688746	1.51125																									Endo	7daysTHC	1.65	4.6	0.365869	39	3.85996	5.34004
			2.36	2.3	0.259794	39	1.77452	2.82548																											2.36	5.6	0.314353	39	4.96416	6.23584
			2.44	2.9	0.256316	39	2.38155	3.41845																											2.44	6.2	0.301303	39	5.59056	6.80944
			2.83	3.5	0.222008	39	3.05095	3.94905																											2.83	6.6	0.277273	39	6.03916	7.16084
			3.22	3.8	0.226864	39	3.34112	4.25888																											3.22	6.9	0.334443	39	6.22353	7.57647
			3.61	4.4	0.260451	39	3.87319	4.92681																											3.61	7.6	0.370512	39	6.85057	8.34943
		AcuteTHC	1.65	1.22222	0.214318	39	0.788723	1.65572																										AcuteTHC	1.65	3.88889	0.38566	39	3.10882	4.66896
			2.36	2.11111	0.273847	39	1.5572	2.66502																											2.36	4.44444	0.331357	39	3.77421	5.11468
			2.44	2.77778	0.270181	39	2.23129	3.32427																											2.44	5.44444	0.317601	39	4.80204	6.08685
			2.83	3.11111	0.234017	39	2.63777	3.58446																											2.83	6	0.292271	39	5.40883	6.59117
			3.22	3.77778	0.239136	39	3.29408	4.26148																											3.22	6.88889	0.352533	39	6.17582	7.60196
			3.61	4.11111	0.27454	39	3.5558	4.66642																											3.61	7.44444	0.390554	39	6.65447	8.23441
		Vehicle	1.65	1.16667	0.185605	39	0.791245	1.54209																										Vehicle	1.65	4.75	0.333992	39	4.07444	5.42556
			2.36	1.83333	0.237158	39	1.35364	2.31303																											2.36	5.58333	0.286964	39	5.00289	6.16377
			2.44	2.75	0.233984	39	2.27672	3.22328																											2.44	6.33333	0.275051	39	5.77699	6.88968
			2.83	3.41667	0.202665	39	3.00674	3.8266																											2.83	6.91667	0.253115	39	6.40469	7.42864
			3.22	4	0.207097	39	3.58111	4.41889																											3.22	7.41667	0.305303	39	6.79913	8.0342
			3.61	4.08333	0.237758	39	3.60242	4.56424																											3.61	7.91667	0.33823	39	7.23253	8.6008
	Sham	7daysTHC	1.65	.a	.	.	.	.																									Sham	7daysTHC	1.65	.a	.	.	.	.
			2.36	.a	.	.	.	.																											2.36	.a	.	.	.	.
			2.44	.a	.	.	.	.																											2.44	.a	.	.	.	.
			2.83	.a	.	.	.	.																											2.83	.a	.	.	.	.
			3.22	.a	.	.	.	.																											3.22	.a	.	.	.	.
			3.61	.a	.	.	.	.																											3.61	.a	.	.	.	.
		AcuteTHC	1.65	.a	.	.	.	.																										AcuteTHC	1.65	.a	.	.	.	.
			2.36	.a	.	.	.	.																											2.36	.a	.	.	.	.
			2.44	.a	.	.	.	.																											2.44	.a	.	.	.	.
			2.83	.a	.	.	.	.																											2.83	.a	.	.	.	.
			3.22	.a	.	.	.	.																											3.22	.a	.	.	.	.
			3.61	.a	.	.	.	.																											3.61	.a	.	.	.	.
		Vehicle	1.65	1	0.185605	39	0.624579	1.37542																										Vehicle	1.65	2.66667	0.333992	39	1.99111	3.34223
			2.36	2.16667	0.237158	39	1.68697	2.64636																											2.36	3.5	0.286964	39	2.91956	4.08044
			2.44	2.91667	0.233984	39	2.44339	3.38994																											2.44	4.08333	0.275051	39	3.52699	4.63968
			2.83	3.41667	0.202665	39	3.00674	3.8266																											2.83	4.33333	0.253115	39	3.82136	4.84531
			3.22	3.91667	0.207097	39	3.49777	4.33556																											3.22	4.91667	0.305303	39	4.29913	5.5342
			3.61	4.25	0.237758	39	3.76909	4.73091																											3.61	5	0.33823	39	4.31587	5.68413
	a. This level combination of factors is not observed, thus the corresponding population marginal mean is not estimable. b. Dependent Variable: Daybasal.																																a. This level combination of factors is not observed, thus the corresponding population marginal mean is not estimable. b. Dependent Variable: Day7.
	Pairwise Comparisonsd																																Pairwise Comparisonsd
	Surgery	Filament	(I) Treatment	(J) Treatment	Mean Difference (I-J)	Std. Error	df	Sig.a	95% Confidence Interval for Differencea																								Surgery	Filament	(I) Treatment	(J) Treatment	Mean Difference (I-J)	Std. Error	df	Sig.a	95% Confidence Interval for Differencea
									Lower Bound	Upper Bound																															Lower Bound	Upper Bound
	Endo	1.65	7daysTHC	AcuteTHC	-0.122222	0.295417	39	1	-0.861255	0.61681																							Endo	1.65	7daysTHC	AcuteTHC	0.711111	0.531596	39	0.566238	-0.61876	2.04098
				Vehicle	-0.0666667	0.275297	39	1	-0.755365	0.622031																										Vehicle	-0.15	0.495389	39	1	-1.38929	1.08929
			AcuteTHC	7daysTHC	0.122222	0.295417	39	1	-0.61681	0.861255																									AcuteTHC	7daysTHC	-0.711111	0.531596	39	0.566238	-2.04098	0.61876
				Vehicle	0.0555556	0.283516	39	1	-0.653705	0.764816																										Vehicle	-0.861111	0.51018	39	0.298265	-2.13741	0.415186
			Vehicle	7daysTHC	0.0666667	0.275297	39	1	-0.622031	0.755365																									Vehicle	7daysTHC	0.15	0.495389	39	1	-1.08929	1.38929
				AcuteTHC	-0.0555556	0.283516	39	1	-0.764816	0.653705																										AcuteTHC	0.861111	0.51018	39	0.298265	-0.415186	2.13741
		2.36	7daysTHC	AcuteTHC	0.188889	0.377472	39	1	-0.755416	1.13319																								2.36	7daysTHC	AcuteTHC	1.156*	0.456744	39	0.0466715	0.0129384	2.29817
				Vehicle	0.466667	0.351763	39	0.57702	-0.413323	1.34666																										Vehicle	0.0166667	0.425636	39	1	-1.04813	1.08146
			AcuteTHC	7daysTHC	-0.188889	0.377472	39	1	-1.13319	0.755416																									AcuteTHC	7daysTHC	-1.156*	0.456744	39	0.0466715	-2.29817	-0.0129384
				Vehicle	0.277778	0.362265	39	1	-0.628486	1.18404																										Vehicle	-1.139*	0.438344	39	0.0394746	-2.23548	-0.0423022
			Vehicle	7daysTHC	-0.466667	0.351763	39	0.57702	-1.34666	0.413323																									Vehicle	7daysTHC	-0.0166667	0.425636	39	1	-1.08146	1.04813
				AcuteTHC	-0.277778	0.362265	39	1	-1.18404	0.628486																										AcuteTHC	1.139*	0.438344	39	0.0394746	0.0423022	2.23548
		2.44	7daysTHC	AcuteTHC	0.122222	0.372419	39	1	-0.809442	1.05389																								2.44	7daysTHC	AcuteTHC	0.755556	0.437783	39	0.276862	-0.339628	1.85074
				Vehicle	0.15	0.347054	39	1	-0.71821	1.01821																										Vehicle	-0.133333	0.407966	39	1	-1.15393	0.887258
			AcuteTHC	7daysTHC	-0.122222	0.372419	39	1	-1.05389	0.809442																									AcuteTHC	7daysTHC	-0.755556	0.437783	39	0.276862	-1.85074	0.339628
				Vehicle	0.0277778	0.357416	39	1	-0.866355	0.92191																										Vehicle	-0.888889	0.420147	39	0.122437	-1.93995	0.162175
			Vehicle	7daysTHC	-0.15	0.347054	39	1	-1.01821	0.71821																									Vehicle	7daysTHC	0.133333	0.407966	39	1	-0.887258	1.15393
				AcuteTHC	-0.0277778	0.357416	39	1	-0.92191	0.866355																										AcuteTHC	0.888889	0.420147	39	0.122437	-0.162175	1.93995
		2.83	7daysTHC	AcuteTHC	0.388889	0.322571	39	0.705716	-0.418073	1.19585																								2.83	7daysTHC	AcuteTHC	0.6	0.402868	39	0.433338	-0.407839	1.60784
				Vehicle	0.0833333	0.300601	39	1	-0.668667	0.835334																										Vehicle	-0.316667	0.375429	39	1	-1.25586	0.622529
			AcuteTHC	7daysTHC	-0.388889	0.322571	39	0.705716	-1.19585	0.418073																									AcuteTHC	7daysTHC	-0.6	0.402868	39	0.433338	-1.60784	0.407839
				Vehicle	-0.305556	0.309576	39	0.989161	-1.08001	0.468898																										Vehicle	-0.916667	0.386639	39	0.0683508	-1.8839	0.0505713
			Vehicle	7daysTHC	-0.0833333	0.300601	39	1	-0.835334	0.668667																									Vehicle	7daysTHC	0.316667	0.375429	39	1	-0.622529	1.25586
				AcuteTHC	0.305556	0.309576	39	0.989161	-0.468898	1.08001																										AcuteTHC	0.916667	0.386639	39	0.0683508	-0.0505713	1.8839
		3.22	7daysTHC	AcuteTHC	0.0222222	0.329626	39	1	-0.802388	0.846833																								3.22	7daysTHC	AcuteTHC	0.0111111	0.485934	39	1	-1.20453	1.22675
				Vehicle	-0.2	0.307175	39	1	-0.968447	0.568447																										Vehicle	-0.516667	0.452837	39	0.782541	-1.64951	0.616178
			AcuteTHC	7daysTHC	-0.0222222	0.329626	39	1	-0.846833	0.802388																									AcuteTHC	7daysTHC	-0.0111111	0.485934	39	1	-1.22675	1.20453
				Vehicle	-0.222222	0.316347	39	1	-1.01361	0.569169																										Vehicle	-0.527778	0.466358	39	0.794013	-1.69445	0.63889
			Vehicle	7daysTHC	0.2	0.307175	39	1	-0.568447	0.968447																									Vehicle	7daysTHC	0.516667	0.452837	39	0.782541	-0.616178	1.64951
				AcuteTHC	0.222222	0.316347	39	1	-0.569169	1.01361																										AcuteTHC	0.527778	0.466358	39	0.794013	-0.63889	1.69445
		3.61	7daysTHC	AcuteTHC	0.288889	0.378427	39	1	-0.657805	1.23558																								3.61	7daysTHC	AcuteTHC	0.155556	0.538342	39	1	-1.19119	1.5023
				Vehicle	0.316667	0.352652	39	1	-0.565549	1.19888																										Vehicle	-0.316667	0.501676	39	1	-1.57169	0.938354
			AcuteTHC	7daysTHC	-0.288889	0.378427	39	1	-1.23558	0.657805																									AcuteTHC	7daysTHC	-0.155556	0.538342	39	1	-1.5023	1.19119
				Vehicle	0.0277778	0.363182	39	1	-0.880778	0.936334																										Vehicle	-0.472222	0.516654	39	1	-1.76471	0.82027
			Vehicle	7daysTHC	-0.316667	0.352652	39	1	-1.19888	0.565549																									Vehicle	7daysTHC	0.316667	0.501676	39	1	-0.938354	1.57169
				AcuteTHC	-0.0277778	0.363182	39	1	-0.936334	0.880778																										AcuteTHC	0.472222	0.516654	39	1	-0.82027	1.76471
	Sham	1.65	7daysTHC	AcuteTHC	.b,c	.	.	.	.	.																							Sham	1.65	7daysTHC	AcuteTHC	.b,c	.	.	.	.	.
				Vehicle	.b	.	.	.	.	.																										Vehicle	.b	.	.	.	.	.
			AcuteTHC	7daysTHC	.b,c	.	.	.	.	.																									AcuteTHC	7daysTHC	.b,c	.	.	.	.	.
				Vehicle	.b	.	.	.	.	.																										Vehicle	.b	.	.	.	.	.
			Vehicle	7daysTHC	.c	.	.	.	.	.																									Vehicle	7daysTHC	.c	.	.	.	.	.
				AcuteTHC	.c	.	.	.	.	.																										AcuteTHC	.c	.	.	.	.	.
		2.36	7daysTHC	AcuteTHC	.b,c	.	.	.	.	.																								2.36	7daysTHC	AcuteTHC	.b,c	.	.	.	.	.
				Vehicle	.b	.	.	.	.	.																										Vehicle	.b	.	.	.	.	.
			AcuteTHC	7daysTHC	.b,c	.	.	.	.	.																									AcuteTHC	7daysTHC	.b,c	.	.	.	.	.
				Vehicle	.b	.	.	.	.	.																										Vehicle	.b	.	.	.	.	.
			Vehicle	7daysTHC	.c	.	.	.	.	.																									Vehicle	7daysTHC	.c	.	.	.	.	.
				AcuteTHC	.c	.	.	.	.	.																										AcuteTHC	.c	.	.	.	.	.
		2.44	7daysTHC	AcuteTHC	.b,c	.	.	.	.	.																								2.44	7daysTHC	AcuteTHC	.b,c	.	.	.	.	.
				Vehicle	.b	.	.	.	.	.																										Vehicle	.b	.	.	.	.	.
			AcuteTHC	7daysTHC	.b,c	.	.	.	.	.																									AcuteTHC	7daysTHC	.b,c	.	.	.	.	.
				Vehicle	.b	.	.	.	.	.																										Vehicle	.b	.	.	.	.	.
			Vehicle	7daysTHC	.c	.	.	.	.	.																									Vehicle	7daysTHC	.c	.	.	.	.	.
				AcuteTHC	.c	.	.	.	.	.																										AcuteTHC	.c	.	.	.	.	.
		2.83	7daysTHC	AcuteTHC	.b,c	.	.	.	.	.																								2.83	7daysTHC	AcuteTHC	.b,c	.	.	.	.	.
				Vehicle	.b	.	.	.	.	.																										Vehicle	.b	.	.	.	.	.
			AcuteTHC	7daysTHC	.b,c	.	.	.	.	.																									AcuteTHC	7daysTHC	.b,c	.	.	.	.	.
				Vehicle	.b	.	.	.	.	.																										Vehicle	.b	.	.	.	.	.
			Vehicle	7daysTHC	.c	.	.	.	.	.																									Vehicle	7daysTHC	.c	.	.	.	.	.
				AcuteTHC	.c	.	.	.	.	.																										AcuteTHC	.c	.	.	.	.	.
		3.22	7daysTHC	AcuteTHC	.b,c	.	.	.	.	.																								3.22	7daysTHC	AcuteTHC	.b,c	.	.	.	.	.
				Vehicle	.b	.	.	.	.	.																										Vehicle	.b	.	.	.	.	.
			AcuteTHC	7daysTHC	.b,c	.	.	.	.	.																									AcuteTHC	7daysTHC	.b,c	.	.	.	.	.
				Vehicle	.b	.	.	.	.	.																										Vehicle	.b	.	.	.	.	.
			Vehicle	7daysTHC	.c	.	.	.	.	.																									Vehicle	7daysTHC	.c	.	.	.	.	.
				AcuteTHC	.c	.	.	.	.	.																										AcuteTHC	.c	.	.	.	.	.
		3.61	7daysTHC	AcuteTHC	.b,c	.	.	.	.	.																								3.61	7daysTHC	AcuteTHC	.b,c	.	.	.	.	.
				Vehicle	.b	.	.	.	.	.																										Vehicle	.b	.	.	.	.	.
			AcuteTHC	7daysTHC	.b,c	.	.	.	.	.																									AcuteTHC	7daysTHC	.b,c	.	.	.	.	.
				Vehicle	.b	.	.	.	.	.																										Vehicle	.b	.	.	.	.	.
			Vehicle	7daysTHC	.c	.	.	.	.	.																									Vehicle	7daysTHC	.c	.	.	.	.	.
				AcuteTHC	.c	.	.	.	.	.																										AcuteTHC	.c	.	.	.	.	.
	Based on estimated marginal means																																Based on estimated marginal means
	a. Adjustment for multiple comparisons: Bonferroni. b. The level combination of factors in (I) is not observed. c. The level combination of factors in (J) is not observed. d. Dependent Variable: Daybasal.																																a. Adjustment for multiple comparisons: Bonferroni. *. The mean difference is significant at the .05 level. b. The level combination of factors in (I) is not observed. c. The level combination of factors in (J) is not observed. d. Dependent Variable: Day7.
	Univariate Testsa																																Univariate Testsa
	Surgery	Filament	Numerator df	Denominator df	F	Sig.																											Surgery	Filament	Numerator df	Denominator df	F	Sig.
	Endo	1.65	2	39	0.0862698	0.917521																											Endo	1.65	2	39	1.54584	0.225909
		2.36	2	39	0.9004	0.414687																												2.36	2	39	4.24853	0.021417
		2.44	2	39	0.101338	0.903865																												2.44	2	39	2.46678	0.0980011
		2.83	2	39	0.802652	0.455403																												2.83	2	39	2.83606	0.0708019
		3.22	2	39	0.318956	0.728786																												3.22	2	39	0.895882	0.416482
		3.61	2	39	0.466689	0.630532																												3.61	2	39	0.449924	0.640945
	Sham	1.65	0	.	.	.																											Sham	1.65	0	.	.	.
		2.36	0	.	.	.																												2.36	0	.	.	.
		2.44	0	.	.	.																												2.44	0	.	.	.
		2.83	0	.	.	.																												2.83	0	.	.	.
		3.22	0	.	.	.																												3.22	0	.	.	.
		3.61	0	.	.	.																												3.61	0	.	.	.
	Each F tests the simple effects of Treatment within each level combination of the other effects shown. These tests are based on the estimable linearly independent pairwise comparisons among the estimated marginal means.																																Each F tests the simple effects of Treatment within each level combination of the other effects shown. These tests are based on the estimable linearly independent pairwise comparisons among the estimated marginal means.
	a. Dependent Variable: Daybasal.																																a. Dependent Variable: Day7.
	13. Surgery * Treatment * Filament																																13. Surgery * Treatment * Filament
	Estimatesb																																Estimatesb
	Surgery	Treatment	Filament	Mean	Std. Error	df	95% Confidence Interval																										Surgery	Treatment	Filament	Mean	Std. Error	df	95% Confidence Interval
							Lower Bound	Upper Bound																															Lower Bound	Upper Bound
	Endo	7daysTHC	1.65	1.1	0.20332	39	0.688746	1.51125																									Endo	7daysTHC	1.65	4.6	0.365869	39	3.85996	5.34004
			2.36	2.3	0.259794	39	1.77452	2.82548																											2.36	5.6	0.314353	39	4.96416	6.23584
			2.44	2.9	0.256316	39	2.38155	3.41845																											2.44	6.2	0.301303	39	5.59056	6.80944
			2.83	3.5	0.222008	39	3.05095	3.94905																											2.83	6.6	0.277273	39	6.03916	7.16084
			3.22	3.8	0.226864	39	3.34112	4.25888																											3.22	6.9	0.334443	39	6.22353	7.57647
			3.61	4.4	0.260451	39	3.87319	4.92681																											3.61	7.6	0.370512	39	6.85057	8.34943
		AcuteTHC	1.65	1.22222	0.214318	39	0.788723	1.65572																										AcuteTHC	1.65	3.88889	0.38566	39	3.10882	4.66896
			2.36	2.11111	0.273847	39	1.5572	2.66502																											2.36	4.44444	0.331357	39	3.77421	5.11468
			2.44	2.77778	0.270181	39	2.23129	3.32427																											2.44	5.44444	0.317601	39	4.80204	6.08685
			2.83	3.11111	0.234017	39	2.63777	3.58446																											2.83	6	0.292271	39	5.40883	6.59117
			3.22	3.77778	0.239136	39	3.29408	4.26148																											3.22	6.88889	0.352533	39	6.17582	7.60196
			3.61	4.11111	0.27454	39	3.5558	4.66642																											3.61	7.44444	0.390554	39	6.65447	8.23441
		Vehicle	1.65	1.16667	0.185605	39	0.791245	1.54209																										Vehicle	1.65	4.75	0.333992	39	4.07444	5.42556
			2.36	1.83333	0.237158	39	1.35364	2.31303																											2.36	5.58333	0.286964	39	5.00289	6.16377
			2.44	2.75	0.233984	39	2.27672	3.22328																											2.44	6.33333	0.275051	39	5.77699	6.88968
			2.83	3.41667	0.202665	39	3.00674	3.8266																											2.83	6.91667	0.253115	39	6.40469	7.42864
			3.22	4	0.207097	39	3.58111	4.41889																											3.22	7.41667	0.305303	39	6.79913	8.0342
			3.61	4.08333	0.237758	39	3.60242	4.56424																											3.61	7.91667	0.33823	39	7.23253	8.6008
	Sham	7daysTHC	1.65	.a	.	.	.	.																									Sham	7daysTHC	1.65	.a	.	.	.	.
			2.36	.a	.	.	.	.																											2.36	.a	.	.	.	.
			2.44	.a	.	.	.	.																											2.44	.a	.	.	.	.
			2.83	.a	.	.	.	.																											2.83	.a	.	.	.	.
			3.22	.a	.	.	.	.																											3.22	.a	.	.	.	.
			3.61	.a	.	.	.	.																											3.61	.a	.	.	.	.
		AcuteTHC	1.65	.a	.	.	.	.																										AcuteTHC	1.65	.a	.	.	.	.
			2.36	.a	.	.	.	.																											2.36	.a	.	.	.	.
			2.44	.a	.	.	.	.																											2.44	.a	.	.	.	.
			2.83	.a	.	.	.	.																											2.83	.a	.	.	.	.
			3.22	.a	.	.	.	.																											3.22	.a	.	.	.	.
			3.61	.a	.	.	.	.																											3.61	.a	.	.	.	.
		Vehicle	1.65	1	0.185605	39	0.624579	1.37542																										Vehicle	1.65	2.66667	0.333992	39	1.99111	3.34223
			2.36	2.16667	0.237158	39	1.68697	2.64636																											2.36	3.5	0.286964	39	2.91956	4.08044
			2.44	2.91667	0.233984	39	2.44339	3.38994																											2.44	4.08333	0.275051	39	3.52699	4.63968
			2.83	3.41667	0.202665	39	3.00674	3.8266																											2.83	4.33333	0.253115	39	3.82136	4.84531
			3.22	3.91667	0.207097	39	3.49777	4.33556																											3.22	4.91667	0.305303	39	4.29913	5.5342
			3.61	4.25	0.237758	39	3.76909	4.73091																											3.61	5	0.33823	39	4.31587	5.68413
	a. This level combination of factors is not observed, thus the corresponding population marginal mean is not estimable. b. Dependent Variable: Daybasal.																																a. This level combination of factors is not observed, thus the corresponding population marginal mean is not estimable. b. Dependent Variable: Day7.
	Pairwise Comparisonsd																																Pairwise Comparisonsd
	Surgery	Treatment	(I) Filament	(J) Filament	Mean Difference (I-J)	Std. Error	df	Sig.a	95% Confidence Interval for Differencea																								Surgery	Treatment	(I) Filament	(J) Filament	Mean Difference (I-J)	Std. Error	df	Sig.a	95% Confidence Interval for Differencea
									Lower Bound	Upper Bound																															Lower Bound	Upper Bound
	Endo	7daysTHC	1.65	2.36	-1.200*	0.329897	73.7414	0.00760994	-2.20085	-0.19915																							Endo	7daysTHC	1.65	2.36	-1	0.482367	76.27	0.623094	-2.4618	0.461795
				2.44	-1.800*	0.327165	74.1593	7.67802e-06	-2.79238	-0.807625																										2.44	-1.600*	0.473966	75.2336	0.0175076	-3.03698	-0.163023
				2.83	-2.400*	0.301043	77.4045	1.67192e-10	-3.31187	-1.48813																										2.83	-2.000*	0.459065	72.6863	0.000639457	-3.3934	-0.606598
				3.22	-2.700*	0.304641	77.082	3.27854e-12	-3.62289	-1.77711																										3.22	-2.300*	0.495694	77.3792	0.00020936	-3.80148	-0.798516
				3.61	-3.300*	0.330415	73.6614	3.66363e-14	-4.30246	-2.29754																										3.61	-3.000*	0.520711	77.9876	2.37656e-06	-4.57687	-1.42313
			2.36	1.65	1.200*	0.329897	73.7414	0.00760994	0.19915	2.20085																									2.36	1.65	1	0.482367	76.27	0.623094	-0.461795	2.4618
				2.44	-0.6	0.364953	77.9858	1	-1.70519	0.50519																										2.44	-0.6	0.435432	77.8602	1	-1.91869	0.718689
				2.83	-1.200*	0.341732	76.1494	0.0112881	-2.23566	-0.164342																										2.83	-1	0.419163	76.8027	0.292661	-2.26997	0.269974
				3.22	-1.500*	0.344906	76.6097	0.000624324	-2.54507	-0.454926																										3.22	-1.3	0.458987	77.7026	0.0882427	-2.69011	0.0901144
				3.61	-2.100*	0.367869	77.9995	2.95737e-06	-3.21401	-0.985986																										3.61	-2.000*	0.485898	75.9835	0.0014539	-3.47267	-0.527325
			2.44	1.65	1.800*	0.327165	74.1593	7.67802e-06	0.807625	2.79238																									2.44	1.65	1.600*	0.473966	75.2336	0.0175076	0.163023	3.03698
				2.36	0.6	0.364953	77.9858	1	-0.50519	1.70519																										2.36	0.6	0.435432	77.8602	1	-0.718689	1.91869
				2.83	-0.6	0.339095	76.443	1	-1.62754	0.427541																										2.83	-0.4	0.409468	77.4673	1	-1.64026	0.840256
				3.22	-0.9	0.342294	76.8661	0.154933	-1.93705	0.137049																										3.22	-0.7	0.45015	77.1658	1	-2.06365	0.663651
				3.61	-1.500*	0.365421	77.98	0.00148206	-2.60661	-0.39339																										3.61	-1.4	0.477559	74.8874	0.0670568	-2.84809	0.0480896
			2.83	1.65	2.400*	0.301043	77.4045	1.67192e-10	1.48813	3.31187																									2.83	1.65	2.000*	0.459065	72.6863	0.000639457	0.606598	3.3934
				2.36	1.200*	0.341732	76.1494	0.0112881	0.164342	2.23566																										2.36	1	0.419163	76.8027	0.292661	-0.269974	2.26997
				2.44	0.6	0.339095	76.443	1	-0.427541	1.62754																										2.44	0.4	0.409468	77.4673	1	-0.840256	1.64026
				3.22	-0.3	0.317419	77.9635	1	-1.26125	0.661251																										3.22	-0.3	0.434433	75.4108	1	-1.61702	1.01702
				3.61	-0.9	0.342232	76.0919	0.155014	-1.9372	0.137198																										3.61	-1	0.462774	72.253	0.510301	-2.40495	0.404945
			3.22	1.65	2.700*	0.304641	77.082	3.27854e-12	1.77711	3.62289																									3.22	1.65	2.300*	0.495694	77.3792	0.00020936	0.798516	3.80148
				2.36	1.500*	0.344906	76.6097	0.000624324	0.454926	2.54507																										2.36	1.3	0.458987	77.7026	0.0882427	-0.0901144	2.69011
				2.44	0.9	0.342294	76.8661	0.154933	-0.137049	1.93705																										2.44	0.7	0.45015	77.1658	1	-0.663651	2.06365
				2.83	0.3	0.317419	77.9635	1	-0.661251	1.26125																										2.83	0.3	0.434433	75.4108	1	-1.01702	1.61702
				3.61	-0.6	0.345401	76.559	1	-1.6466	0.446597																										3.61	-0.7	0.49913	77.1958	1	-2.21201	0.812008
			3.61	1.65	3.300*	0.330415	73.6614	3.66363e-14	2.29754	4.30246																									3.61	1.65	3.000*	0.520711	77.9876	2.37656e-06	1.42313	4.57687
				2.36	2.100*	0.367869	77.9995	2.95737e-06	0.985986	3.21401																										2.36	2.000*	0.485898	75.9835	0.0014539	0.527325	3.47267
				2.44	1.500*	0.365421	77.98	0.00148206	0.39339	2.60661																										2.44	1.4	0.477559	74.8874	0.0670568	-0.0480896	2.84809
				2.83	0.9	0.342232	76.0919	0.155014	-0.137198	1.9372																										2.83	1	0.462774	72.253	0.510301	-0.404945	2.40495
				3.22	0.6	0.345401	76.559	1	-0.446597	1.6466																										3.22	0.7	0.49913	77.1958	1	-0.812008	2.21201
		AcuteTHC	1.65	2.36	-0.888889	0.347742	73.7414	0.189624	-1.94388	0.1661																								AcuteTHC	1.65	2.36	-0.555556	0.50846	76.27	1	-2.09642	0.985312
				2.44	-1.556*	0.344862	74.1593	0.000356487	-2.60161	-0.5095																										2.44	-1.556*	0.499604	75.2336	0.0392122	-3.07026	-0.0408492
				2.83	-1.889*	0.317327	77.4045	1.09038e-06	-2.85008	-0.927698																										2.83	-2.111*	0.483897	72.6863	0.000625617	-3.57989	-0.642336
				3.22	-2.556*	0.32112	77.082	1.82422e-10	-3.52837	-1.58275																										3.22	-3.000*	0.522507	77.3792	2.62742e-06	-4.5827	-1.4173
				3.61	-2.889*	0.348288	73.6614	5.55486e-11	-3.94557	-1.83221																										3.61	-3.556*	0.548877	77.9876	1.14343e-07	-5.21772	-1.89339
			2.36	1.65	0.888889	0.347742	73.7414	0.189624	-0.1661	1.94388																									2.36	1.65	0.555556	0.50846	76.27	1	-0.985312	2.09642
				2.44	-0.666667	0.384695	77.9858	1	-1.83164	0.498306																										2.44	-1	0.458986	77.8602	0.485665	-2.39002	0.39002
				2.83	-1	0.360217	76.1494	0.103802	-2.09168	0.0916796																										2.83	-1.556*	0.441837	76.8027	0.0109148	-2.89423	-0.216886
				3.22	-1.667*	0.363563	76.6097	0.00026126	-2.76827	-0.565062																										3.22	-2.444*	0.483815	77.7026	4.23156e-05	-3.90975	-0.979135
				3.61	-2.000*	0.387768	77.9995	2.77219e-05	-3.17427	-0.825727																										3.61	-3.000*	0.512181	75.9835	1.69947e-06	-4.55234	-1.44766
			2.44	1.65	1.556*	0.344862	74.1593	0.000356487	0.5095	2.60161																									2.44	1.65	1.556*	0.499604	75.2336	0.0392122	0.0408492	3.07026
				2.36	0.666667	0.384695	77.9858	1	-0.498306	1.83164																										2.36	1	0.458986	77.8602	0.485665	-0.39002	2.39002
				2.83	-0.333333	0.357438	76.443	1	-1.41646	0.74979																										2.83	-0.555556	0.431617	77.4673	1	-1.8629	0.751789
				3.22	-1	0.36081	76.8661	0.104919	-2.09315	0.0931454																										3.22	-1.444*	0.4745	77.1658	0.0478557	-2.88186	-0.00703016
				3.61	-1.333*	0.385188	77.98	0.0131196	-2.4998	-0.166864																										3.61	-2.000*	0.503391	74.8874	0.00242677	-3.52642	-0.47358
			2.83	1.65	1.889*	0.317327	77.4045	1.09038e-06	0.927698	2.85008																									2.83	1.65	2.111*	0.483897	72.6863	0.000625617	0.642336	3.57989
				2.36	1	0.360217	76.1494	0.103802	-0.0916796	2.09168																										2.36	1.556*	0.441837	76.8027	0.0109148	0.216886	2.89423
				2.44	0.333333	0.357438	76.443	1	-0.74979	1.41646																										2.44	0.555556	0.431617	77.4673	1	-0.751789	1.8629
				3.22	-0.666667	0.334589	77.9635	0.747258	-1.67991	0.346581																										3.22	-0.888889	0.457933	75.4108	0.839763	-2.27715	0.499371
				3.61	-1	0.360744	76.0919	0.104999	-2.0933	0.0933031																										3.61	-1.44444	0.487806	72.253	0.0621792	-2.92539	0.0364981
			3.22	1.65	2.556*	0.32112	77.082	1.82422e-10	1.58275	3.52837																									3.22	1.65	3.000*	0.522507	77.3792	2.62742e-06	1.4173	4.5827
				2.36	1.667*	0.363563	76.6097	0.00026126	0.565062	2.76827																										2.36	2.444*	0.483815	77.7026	4.23156e-05	0.979135	3.90975
				2.44	1	0.36081	76.8661	0.104919	-0.0931454	2.09315																										2.44	1.444*	0.4745	77.1658	0.0478557	0.00703016	2.88186
				2.83	0.666667	0.334589	77.9635	0.747258	-0.346581	1.67991																										2.83	0.888889	0.457933	75.4108	0.839763	-0.499371	2.27715
				3.61	-0.333333	0.364085	76.559	1	-1.43654	0.769877																										3.61	-0.555556	0.52613	77.1958	1	-2.14935	1.03824
			3.61	1.65	2.889*	0.348288	73.6614	5.55486e-11	1.83221	3.94557																									3.61	1.65	3.556*	0.548877	77.9876	1.14343e-07	1.89339	5.21772
				2.36	2.000*	0.387768	77.9995	2.77219e-05	0.825727	3.17427																										2.36	3.000*	0.512181	75.9835	1.69947e-06	1.44766	4.55234
				2.44	1.333*	0.385188	77.98	0.0131196	0.166864	2.4998																										2.44	2.000*	0.503391	74.8874	0.00242677	0.47358	3.52642
				2.83	1	0.360744	76.0919	0.104999	-0.0933031	2.0933																										2.83	1.44444	0.487806	72.253	0.0621792	-0.0364981	2.92539
				3.22	0.333333	0.364085	76.559	1	-0.769877	1.43654																										3.22	0.555556	0.52613	77.1958	1	-1.03824	2.14935
		Vehicle	1.65	2.36	-0.666667	0.301153	73.7414	0.449115	-1.58031	0.24698																								Vehicle	1.65	2.36	-0.833333	0.440339	76.27	0.933322	-2.16776	0.501097
				2.44	-1.583*	0.29866	74.1593	1.71056e-05	-2.48924	-0.677423																										2.44	-1.583*	0.43267	75.2336	0.00700099	-2.89511	-0.271559
				2.83	-2.250*	0.274813	77.4045	6.42453e-11	-3.08242	-1.41758																										2.83	-2.167*	0.419067	72.6863	2.97439e-05	-3.43866	-0.89467
				3.22	-2.833*	0.278098	77.082	9.38634e-15	-3.67581	-1.99085																										3.22	-2.667*	0.452504	77.3792	1.39896e-06	-4.03733	-1.29601
				3.61	-2.917*	0.301626	73.6614	1.43309e-13	-3.83178	-2.00155																										3.61	-3.167*	0.475342	77.9876	5.16326e-08	-4.60615	-1.72719
			2.36	1.65	0.666667	0.301153	73.7414	0.449115	-0.24698	1.58031																									2.36	1.65	0.833333	0.440339	76.27	0.933322	-0.501097	2.16776
				2.44	-0.916667	0.333155	77.9858	0.110613	-1.92556	0.092229																										2.44	-0.75	0.397493	77.8602	0.943675	-1.95379	0.453793
				2.83	-1.583*	0.311957	76.1494	3.98942e-05	-2.52876	-0.637911																										2.83	-1.333*	0.382642	76.8027	0.0122662	-2.49266	-0.174011
				3.22	-2.167*	0.314855	76.6097	2.13145e-08	-3.12068	-1.21265																										3.22	-1.833*	0.418996	77.7026	0.000558785	-3.10233	-0.564338
				3.61	-2.250*	0.335817	77.9995	4.37222e-08	-3.26695	-1.23305																										3.61	-2.333*	0.443562	75.9835	1.92642e-05	-3.6777	-0.988971
			2.44	1.65	1.583*	0.29866	74.1593	1.71056e-05	0.677423	2.48924																									2.44	1.65	1.583*	0.43267	75.2336	0.00700099	0.271559	2.89511
				2.36	0.916667	0.333155	77.9858	0.110613	-0.092229	1.92556																										2.36	0.75	0.397493	77.8602	0.943675	-0.453793	1.95379
				2.83	-0.666667	0.30955	76.443	0.516283	-1.60468	0.271345																										2.83	-0.583333	0.373791	77.4673	1	-1.71553	0.54886
				3.22	-1.250*	0.31247	76.8661	0.00216509	-2.19669	-0.303308																										3.22	-1.08333	0.410929	77.1658	0.151937	-2.32817	0.161504
				3.61	-1.333*	0.333583	77.98	0.00216801	-2.34353	-0.323141																										3.61	-1.583*	0.43595	74.8874	0.00768616	-2.90525	-0.261414
			2.83	1.65	2.250*	0.274813	77.4045	6.42453e-11	1.41758	3.08242																									2.83	1.65	2.167*	0.419067	72.6863	2.97439e-05	0.89467	3.43866
				2.36	1.583*	0.311957	76.1494	3.98942e-05	0.637911	2.52876																										2.36	1.333*	0.382642	76.8027	0.0122662	0.174011	2.49266
				2.44	0.666667	0.30955	76.443	0.516283	-0.271345	1.60468																										2.44	0.583333	0.373791	77.4673	1	-0.54886	1.71553
				3.22	-0.583333	0.289763	77.9635	0.713273	-1.46083	0.294165																										3.22	-0.5	0.396581	75.4108	1	-1.70227	0.702268
				3.61	-0.666667	0.312413	76.0919	0.54106	-1.61349	0.280162																										3.61	-1	0.422453	72.253	0.309116	-2.28253	0.282534
			3.22	1.65	2.833*	0.278098	77.082	9.38634e-15	1.99085	3.67581																									3.22	1.65	2.667*	0.452504	77.3792	1.39896e-06	1.29601	4.03733
				2.36	2.167*	0.314855	76.6097	2.13145e-08	1.21265	3.12068																										2.36	1.833*	0.418996	77.7026	0.000558785	0.564338	3.10233
				2.44	1.250*	0.31247	76.8661	0.00216509	0.303308	2.19669																										2.44	1.08333	0.410929	77.1658	0.151937	-0.161504	2.32817
				2.83	0.583333	0.289763	77.9635	0.713273	-0.294165	1.46083																										2.83	0.5	0.396581	75.4108	1	-0.702268	1.70227
				3.61	-0.0833333	0.315307	76.559	1	-1.03874	0.872075																										3.61	-0.5	0.455642	77.1958	1	-1.88027	0.880268
			3.61	1.65	2.917*	0.301626	73.6614	1.43309e-13	2.00155	3.83178																									3.61	1.65	3.167*	0.475342	77.9876	5.16326e-08	1.72719	4.60615
				2.36	2.250*	0.335817	77.9995	4.37222e-08	1.23305	3.26695																										2.36	2.333*	0.443562	75.9835	1.92642e-05	0.988971	3.6777
				2.44	1.333*	0.333583	77.98	0.00216801	0.323141	2.34353																										2.44	1.583*	0.43595	74.8874	0.00768616	0.261414	2.90525
				2.83	0.666667	0.312413	76.0919	0.54106	-0.280162	1.61349																										2.83	1	0.422453	72.253	0.309116	-0.282534	2.28253
				3.22	0.0833333	0.315307	76.559	1	-0.872075	1.03874																										3.22	0.5	0.455642	77.1958	1	-0.880268	1.88027
	Sham	7daysTHC	1.65	2.36	.b,c	.	.	.	.	.																							Sham	7daysTHC	1.65	2.36	.b,c	.	.	.	.	.
				2.44	.b,c	.	.	.	.	.																										2.44	.b,c	.	.	.	.	.
				2.83	.b,c	.	.	.	.	.																										2.83	.b,c	.	.	.	.	.
				3.22	.b,c	.	.	.	.	.																										3.22	.b,c	.	.	.	.	.
				3.61	.b,c	.	.	.	.	.																										3.61	.b,c	.	.	.	.	.
			2.36	1.65	.b,c	.	.	.	.	.																									2.36	1.65	.b,c	.	.	.	.	.
				2.44	.b,c	.	.	.	.	.																										2.44	.b,c	.	.	.	.	.
				2.83	.b,c	.	.	.	.	.																										2.83	.b,c	.	.	.	.	.
				3.22	.b,c	.	.	.	.	.																										3.22	.b,c	.	.	.	.	.
				3.61	.b,c	.	.	.	.	.																										3.61	.b,c	.	.	.	.	.
			2.44	1.65	.b,c	.	.	.	.	.																									2.44	1.65	.b,c	.	.	.	.	.
				2.36	.b,c	.	.	.	.	.																										2.36	.b,c	.	.	.	.	.
				2.83	.b,c	.	.	.	.	.																										2.83	.b,c	.	.	.	.	.
				3.22	.b,c	.	.	.	.	.																										3.22	.b,c	.	.	.	.	.
				3.61	.b,c	.	.	.	.	.																										3.61	.b,c	.	.	.	.	.
			2.83	1.65	.b,c	.	.	.	.	.																									2.83	1.65	.b,c	.	.	.	.	.
				2.36	.b,c	.	.	.	.	.																										2.36	.b,c	.	.	.	.	.
				2.44	.b,c	.	.	.	.	.																										2.44	.b,c	.	.	.	.	.
				3.22	.b,c	.	.	.	.	.																										3.22	.b,c	.	.	.	.	.
				3.61	.b,c	.	.	.	.	.																										3.61	.b,c	.	.	.	.	.
			3.22	1.65	.b,c	.	.	.	.	.																									3.22	1.65	.b,c	.	.	.	.	.
				2.36	.b,c	.	.	.	.	.																										2.36	.b,c	.	.	.	.	.
				2.44	.b,c	.	.	.	.	.																										2.44	.b,c	.	.	.	.	.
				2.83	.b,c	.	.	.	.	.																										2.83	.b,c	.	.	.	.	.
				3.61	.b,c	.	.	.	.	.																										3.61	.b,c	.	.	.	.	.
			3.61	1.65	.b,c	.	.	.	.	.																									3.61	1.65	.b,c	.	.	.	.	.
				2.36	.b,c	.	.	.	.	.																										2.36	.b,c	.	.	.	.	.
				2.44	.b,c	.	.	.	.	.																										2.44	.b,c	.	.	.	.	.
				2.83	.b,c	.	.	.	.	.																										2.83	.b,c	.	.	.	.	.
				3.22	.b,c	.	.	.	.	.																										3.22	.b,c	.	.	.	.	.
		AcuteTHC	1.65	2.36	.b,c	.	.	.	.	.																								AcuteTHC	1.65	2.36	.b,c	.	.	.	.	.
				2.44	.b,c	.	.	.	.	.																										2.44	.b,c	.	.	.	.	.
				2.83	.b,c	.	.	.	.	.																										2.83	.b,c	.	.	.	.	.
				3.22	.b,c	.	.	.	.	.																										3.22	.b,c	.	.	.	.	.
				3.61	.b,c	.	.	.	.	.																										3.61	.b,c	.	.	.	.	.
			2.36	1.65	.b,c	.	.	.	.	.																									2.36	1.65	.b,c	.	.	.	.	.
				2.44	.b,c	.	.	.	.	.																										2.44	.b,c	.	.	.	.	.
				2.83	.b,c	.	.	.	.	.																										2.83	.b,c	.	.	.	.	.
				3.22	.b,c	.	.	.	.	.																										3.22	.b,c	.	.	.	.	.
				3.61	.b,c	.	.	.	.	.																										3.61	.b,c	.	.	.	.	.
			2.44	1.65	.b,c	.	.	.	.	.																									2.44	1.65	.b,c	.	.	.	.	.
				2.36	.b,c	.	.	.	.	.																										2.36	.b,c	.	.	.	.	.
				2.83	.b,c	.	.	.	.	.																										2.83	.b,c	.	.	.	.	.
				3.22	.b,c	.	.	.	.	.																										3.22	.b,c	.	.	.	.	.
				3.61	.b,c	.	.	.	.	.																										3.61	.b,c	.	.	.	.	.
			2.83	1.65	.b,c	.	.	.	.	.																									2.83	1.65	.b,c	.	.	.	.	.
				2.36	.b,c	.	.	.	.	.																										2.36	.b,c	.	.	.	.	.
				2.44	.b,c	.	.	.	.	.																										2.44	.b,c	.	.	.	.	.
				3.22	.b,c	.	.	.	.	.																										3.22	.b,c	.	.	.	.	.
				3.61	.b,c	.	.	.	.	.																										3.61	.b,c	.	.	.	.	.
			3.22	1.65	.b,c	.	.	.	.	.																									3.22	1.65	.b,c	.	.	.	.	.
				2.36	.b,c	.	.	.	.	.																										2.36	.b,c	.	.	.	.	.
				2.44	.b,c	.	.	.	.	.																										2.44	.b,c	.	.	.	.	.
				2.83	.b,c	.	.	.	.	.																										2.83	.b,c	.	.	.	.	.
				3.61	.b,c	.	.	.	.	.																										3.61	.b,c	.	.	.	.	.
			3.61	1.65	.b,c	.	.	.	.	.																									3.61	1.65	.b,c	.	.	.	.	.
				2.36	.b,c	.	.	.	.	.																										2.36	.b,c	.	.	.	.	.
				2.44	.b,c	.	.	.	.	.																										2.44	.b,c	.	.	.	.	.
				2.83	.b,c	.	.	.	.	.																										2.83	.b,c	.	.	.	.	.
				3.22	.b,c	.	.	.	.	.																										3.22	.b,c	.	.	.	.	.
		Vehicle	1.65	2.36	-1.167*	0.301153	73.7414	0.00344788	-2.08031	-0.25302																								Vehicle	1.65	2.36	-0.833333	0.440339	76.27	0.933322	-2.16776	0.501097
				2.44	-1.917*	0.29866	74.1593	1.74724e-07	-2.82258	-1.01076																										2.44	-1.417*	0.43267	75.2336	0.0240386	-2.72844	-0.104892
				2.83	-2.417*	0.274813	77.4045	4.3142e-12	-3.24908	-1.58425																										2.83	-1.667*	0.419067	72.6863	0.00244641	-2.93866	-0.39467
				3.22	-2.917*	0.278098	77.082	2.53347e-15	-3.75915	-2.07419																										3.22	-2.250*	0.452504	77.3792	5.83082e-05	-3.62066	-0.879339
				3.61	-3.250*	0.301626	73.6614	1.2879e-15	-4.16511	-2.33489																										3.61	-2.333*	0.475342	77.9876	7.38741e-05	-3.77281	-0.893855
			2.36	1.65	1.167*	0.301153	73.7414	0.00344788	0.25302	2.08031																									2.36	1.65	0.833333	0.440339	76.27	0.933322	-0.501097	2.16776
				2.44	-0.75	0.333155	77.9858	0.407819	-1.7589	0.258896																										2.44	-0.583333	0.397493	77.8602	1	-1.78713	0.620459
				2.83	-1.250*	0.311957	76.1494	0.0021305	-2.19542	-0.304578																										2.83	-0.833333	0.382642	76.8027	0.487313	-1.99266	0.325989
				3.22	-1.750*	0.314855	76.6097	5.70835e-06	-2.70402	-0.795982																										3.22	-1.417*	0.418996	77.7026	0.0169854	-2.68566	-0.147672
				3.61	-2.083*	0.335817	77.9995	3.6947e-07	-3.10028	-1.06638																										3.61	-1.500*	0.443562	75.9835	0.0171107	-2.84436	-0.155638
			2.44	1.65	1.917*	0.29866	74.1593	1.74724e-07	1.01076	2.82258																									2.44	1.65	1.417*	0.43267	75.2336	0.0240386	0.104892	2.72844
				2.36	0.75	0.333155	77.9858	0.407819	-0.258896	1.7589																										2.36	0.583333	0.397493	77.8602	1	-0.620459	1.78713
				2.83	-0.5	0.30955	76.443	1	-1.43801	0.438012																										2.83	-0.25	0.373791	77.4673	1	-1.38219	0.882193
				3.22	-1.000*	0.31247	76.8661	0.0299425	-1.94669	-0.0533083																										3.22	-0.833333	0.410929	77.1658	0.690296	-2.07817	0.411504
				3.61	-1.333*	0.333583	77.98	0.00216801	-2.34353	-0.323141																										3.61	-0.916667	0.43595	74.8874	0.582804	-2.23859	0.405252
			2.83	1.65	2.417*	0.274813	77.4045	4.3142e-12	1.58425	3.24908																									2.83	1.65	1.667*	0.419067	72.6863	0.00244641	0.39467	2.93866
				2.36	1.250*	0.311957	76.1494	0.0021305	0.304578	2.19542																										2.36	0.833333	0.382642	76.8027	0.487313	-0.325989	1.99266
				2.44	0.5	0.30955	76.443	1	-0.438012	1.43801																										2.44	0.25	0.373791	77.4673	1	-0.882193	1.38219
				3.22	-0.5	0.289763	77.9635	1	-1.3775	0.377498																										3.22	-0.583333	0.396581	75.4108	1	-1.7856	0.618935
				3.61	-0.833333	0.312413	76.0919	0.140026	-1.78016	0.113495																										3.61	-0.666667	0.422453	72.253	1	-1.9492	0.615867
			3.22	1.65	2.917*	0.278098	77.082	2.53347e-15	2.07419	3.75915																									3.22	1.65	2.250*	0.452504	77.3792	5.83082e-05	0.879339	3.62066
				2.36	1.750*	0.314855	76.6097	5.70835e-06	0.795982	2.70402																										2.36	1.417*	0.418996	77.7026	0.0169854	0.147672	2.68566
				2.44	1.000*	0.31247	76.8661	0.0299425	0.0533083	1.94669																										2.44	0.833333	0.410929	77.1658	0.690296	-0.411504	2.07817
				2.83	0.5	0.289763	77.9635	1	-0.377498	1.3775																										2.83	0.583333	0.396581	75.4108	1	-0.618935	1.7856
				3.61	-0.333333	0.315307	76.559	1	-1.28874	0.622075																										3.61	-0.0833333	0.455642	77.1958	1	-1.4636	1.29694
			3.61	1.65	3.250*	0.301626	73.6614	1.2879e-15	2.33489	4.16511																									3.61	1.65	2.333*	0.475342	77.9876	7.38741e-05	0.893855	3.77281
				2.36	2.083*	0.335817	77.9995	3.6947e-07	1.06638	3.10028																										2.36	1.500*	0.443562	75.9835	0.0171107	0.155638	2.84436
				2.44	1.333*	0.333583	77.98	0.00216801	0.323141	2.34353																										2.44	0.916667	0.43595	74.8874	0.582804	-0.405252	2.23859
				2.83	0.833333	0.312413	76.0919	0.140026	-0.113495	1.78016																										2.83	0.666667	0.422453	72.253	1	-0.615867	1.9492
				3.22	0.333333	0.315307	76.559	1	-0.622075	1.28874																										3.22	0.0833333	0.455642	77.1958	1	-1.29694	1.4636
	Based on estimated marginal means																																Based on estimated marginal means
	*. The mean difference is significant at the .05 level. a. Adjustment for multiple comparisons: Bonferroni. b. The level combination of factors in (I) is not observed. c. The level combination of factors in (J) is not observed. d. Dependent Variable: Daybasal.																																a. Adjustment for multiple comparisons: Bonferroni. *. The mean difference is significant at the .05 level. b. The level combination of factors in (I) is not observed. c. The level combination of factors in (J) is not observed. d. Dependent Variable: Day7.
	Univariate Testsa																																Univariate Testsa
	Surgery	Treatment	Numerator df	Denominator df	F	Sig.																											Surgery	Treatment	Numerator df	Denominator df	F	Sig.
	Endo	7daysTHC	5	83.5933	27.9834	1.50911e-16																											Endo	7daysTHC	5	67.5394	8.65569	2.22289e-06
		AcuteTHC	5	83.5933	20.3374	3.17327e-13																												AcuteTHC	5	67.5394	13.8769	2.53156e-09
		Vehicle	5	83.5933	33.2137	1.61568e-18																												Vehicle	5	67.5394	13.4584	4.16798e-09
	Sham	7daysTHC	0	.	.	.																											Sham	7daysTHC	0	.	.	.
		AcuteTHC	0	.	.	.																												AcuteTHC	0	.	.	.
		Vehicle	5	83.5933	35.348	2.89342e-19																												Vehicle	5	67.5394	7.5756	1.07007e-05
	Each F tests the simple effects of Filament within each level combination of the other effects shown. These tests are based on the estimable linearly independent pairwise comparisons among the estimated marginal means.																																Each F tests the simple effects of Filament within each level combination of the other effects shown. These tests are based on the estimable linearly independent pairwise comparisons among the estimated marginal means.
	a. Dependent Variable: Daybasal.
[truncated: 41 more columns]

## Sheet: Figure 3-figure supplement 3
Figure 3-figure supplement 2a: Hind paw mechanical sensitivity (AUC)																	Figure 3-figure supplement 2b
Raw data		Mechanical sensitivity (AUC)														Raw data	Day -4																															Raw data	Day 16
		Sham-vehicle		Endo-Vehicle		Endo-7daysTHC		Endo-AcuteTHC										Frequency of response (out of ten applications)
		Day -4	Day 16	Day -4	Day 16	Day -4	Day 16	Day -4	Day 16									Sham-Vehicle							Endo - Vehicle							Endo - 7daysTHC							Endo-AcuteTHC
		3.485	3.33	2.23	2.77	2.03	4.38	2.54	3.365								von Frey filament	1.65	2.36	2.44	2.83	3.22	3.61	AUC	1.65	2.36	2.44	2.83	3.22	3.61	AUC	1.65	2.36	2.44	2.83	3.22	3.61	AUC	1.65	2.36	2.44	2.83	3.22	3.61	AUC				von Frey filament
		2.575	3.165	1.365	1.99	2.615	2.385	2.225	1.405									2	1	1	2	2	3	3.485	0	1	2	1	1	3	2.23	0	0	2	2	1	2	2.03	1	0	1	2	2	2	2.54
		3.525	3.13	2.965	2.145	3.365	1.795	3.205	1.405									0	0	1	2	2	4	2.575	0	0	0	1	1	3	1.365	0	0	2	2	2	3	2.615	0	0	2	2	1	3	2.225
		2.38	1.795	2.62	2.62	3.755	1.41	1.755	5.715									1	2	1	2	2	3	3.525	0	0	1	3	2	4	2.965	1	1	2	2	2	3	3.365	0	1	2	3	2	2	3.205
		1.795	2.38	2.77	2.775	2.77	2.735	3.33	4.105									0	0	1	2	2	3	2.38	0	1	2	1	2	3	2.62	1	1	2	2	3	3	3.755	0	0	0	1	2	3	1.755
		2.58	2.54	2.615	4.61	3.915	2.535	2.345	2.54									0	0	1	1	2	2	1.795	0	0	1	2	3	3	2.77	0	0	1	2	3	3	2.77	1	2	1	2	2	2	3.33
		3.17	3.17	3.56	3.56	1.99	2.19	1.99	2.19									1	0	2	1	2	3	2.58	0	0	2	2	2	3	2.615	2	1	2	2	3	2	3.915	1	0	1	1	2	3	2.345
		2.38	3.555	2.185	1.99	2.385	2.145	3.72	3.405									1	1	2	2	2	2	3.17	0	2	1	2	3	3	3.56	0	0	1	1	2	3	1.99	0	0	1	1	2	3	1.99
		1.795	2.74	3.945	1.95	1.6	2.545	1.56	1.755									0	0	1	2	2	3	2.38	0	0	1	1	2	4	2.185	0	1	1	1	2	3	2.385	2	1	2	2	2	3	3.72
		3.205	3.2	2.58	2.54	4.15	4.855											0	0	1	1	2	2	1.795	0	1	1	3	3	5	3.945	0	0	1	1	1	3	1.6	0	0	0	1	2	2	1.56
		2.185	3.915	1.405	2.535													0	1	2	2	3	2	3.205	1	0	2	1	2	3	2.58	1	2	2	3	2	3	4.15
		3.36	4.185	3.635	3.365													0	0	1	2	2	2	2.185	0	0	1	1	1	2	1.405
	Mean	2.70292	3.09208	2.65625	2.7375	2.8575	2.6975	2.51889	2.87611									1	0	2	2	3	3	3.36	0	1	3	2	2	5	3.635
	SD	0.62859	0.659564	0.808444	0.784018	0.891956	1.0888	0.747587	1.42553								Mean	0.5	0.416667	1.33333	1.75	2.16667	2.66667	2.70292	0.0833333	0.5	1.41667	1.66667	2	3.41667	2.65625	0.5	0.6	1.6	1.8	2.1	2.8	2.8575	0.555556	0.444444	1.11111	1.66667	1.88889	2.55556	2.51889				Mean
	SEM	0.181458	0.1904	0.233378	0.226326	0.282061	0.344308	0.249196	0.475177								SD	0.6742	0.668558	0.492366	0.452267	0.389249	0.651339	0.62859	0.288675	0.6742	0.792961	0.778499	0.738549	0.900337	0.808444	0.707107	0.699206	0.516398	0.632456	0.737865	0.421637	0.891956	0.726483	0.726483	0.781736	0.707107	0.333333	0.527046	0.747587				SD
	CI	1.44574	1.77296	1.03936	1.16946	1.07359	0.519906	1.02372	0.0250465								SEM	0.194625	0.192996	0.142134	0.130558	0.112367	0.188025	0.181458	0.0833333	0.194625	0.228908	0.224733	0.213201	0.259905	0.233378	0.223607	0.221108	0.163299	0.2	0.233333	0.133333	0.282061	0.242161	0.242161	0.260579	0.235702	0.111111	0.175682	0.249196				SEM
		3.9601	4.41121	4.27314	4.30554	4.64141	4.87509	4.01406	5.72718								CI	-0.8484	-0.920449	0.348601	0.845466	1.38817	1.36399	1.44574	-0.494017	-0.8484	-0.169256	0.109669	0.522902	1.61599	1.03936	-0.914214	-0.798412	0.567204	0.535089	0.62427	1.95673	1.07359	-0.897411	-1.00852	-0.452361	0.252453	1.22222	1.50146	1.02372				CI
																		1.8484	1.75378	2.31807	2.65453	2.94517	3.96934	3.9601	0.660684	1.8484	3.00259	3.22366	3.4771	5.21734	4.27314	1.91421	1.99841	2.6328	3.06491	3.57573	3.64327	4.64141	2.00852	1.89741	2.67458	3.08088	2.55556	3.60965	4.01406
Statistics	Descriptive Statistics															Statistics	Descriptive Statistics																															Statistics	Descriptive Statistics
	AUCPAW																Daybasalpaw																																Day16paw
	Subject	Day	Surgery	Treatment	Count	Mean	Standard Deviation	Coefficient of Variation									Subject	Filament	Surgery	Treatment	Count	Mean	Standard Deviation	Coefficient of Variation																									Subject
	1.00	Day -4	Sham	Vehicle	1	3.485	.	.%									1.00	1.65	Sham	Vehicle	1	2	.	.%																									1.00
		Day 16	Sham	Vehicle	1	3.33	.	.%										2.36	Sham	Vehicle	1	1	.	.%
		Total	Sham	Vehicle	2	3.4075	0.109602	0.0321648										2.44	Sham	Vehicle	1	1	.	.%
	2.00	Day -4	Sham	Vehicle	1	2.575	.	.%										2.83	Sham	Vehicle	1	2	.	.%
		Day 16	Sham	Vehicle	1	3.165	.	.%										3.22	Sham	Vehicle	1	2	.	.%
		Total	Sham	Vehicle	2	2.87	0.417193	0.145363										3.61	Sham	Vehicle	1	3	.	.%
	3.00	Day -4	Sham	Vehicle	1	3.525	.	.%										Total	Sham	Vehicle	6	1.83333	0.752773	0.410603
		Day 16	Sham	Vehicle	1	3.13	.	.%									2.00	1.65	Sham	Vehicle	1	0	.	.%																									2.00
		Total	Sham	Vehicle	2	3.3275	0.279307	0.083939										2.36	Sham	Vehicle	1	0	.	.%
	4.00	Day -4	Sham	Vehicle	1	2.38	.	.%										2.44	Sham	Vehicle	1	1	.	.%
		Day 16	Sham	Vehicle	1	1.795	.	.%										2.83	Sham	Vehicle	1	2	.	.%
		Total	Sham	Vehicle	2	2.0875	0.413657	0.198159										3.22	Sham	Vehicle	1	2	.	.%
	5.00	Day -4	Sham	Vehicle	1	1.795	.	.%										3.61	Sham	Vehicle	1	4	.	.%
		Day 16	Sham	Vehicle	1	2.38	.	.%										Total	Sham	Vehicle	6	1.5	1.51658	1.01105
		Total	Sham	Vehicle	2	2.0875	0.413657	0.198159									3.00	1.65	Sham	Vehicle	1	1	.	.%																									3.00
	6.00	Day -4	Sham	Vehicle	1	2.58	.	.%										2.36	Sham	Vehicle	1	2	.	.%
		Day 16	Sham	Vehicle	1	2.54	.	.%										2.44	Sham	Vehicle	1	1	.	.%
		Total	Sham	Vehicle	2	2.56	0.0282843	0.0110485										2.83	Sham	Vehicle	1	2	.	.%
	7.00	Day -4	Sham	Vehicle	1	3.17	.	.%										3.22	Sham	Vehicle	1	2	.	.%
		Day 16	Sham	Vehicle	1	3.17	.	.%										3.61	Sham	Vehicle	1	3	.	.%
		Total	Sham	Vehicle	2	3.17	0	0										Total	Sham	Vehicle	6	1.83333	0.752773	0.410603
	8.00	Day -4	Sham	Vehicle	1	2.38	.	.%									4.00	1.65	Sham	Vehicle	1	0	.	.%																									4.00
		Day 16	Sham	Vehicle	1	3.555	.	.%										2.36	Sham	Vehicle	1	0	.	.%
		Total	Sham	Vehicle	2	2.9675	0.83085	0.279983										2.44	Sham	Vehicle	1	1	.	.%
	9.00	Day -4	Sham	Vehicle	1	1.795	.	.%										2.83	Sham	Vehicle	1	2	.	.%
		Day 16	Sham	Vehicle	1	2.74	.	.%										3.22	Sham	Vehicle	1	2	.	.%
		Total	Sham	Vehicle	2	2.2675	0.668216	0.294693										3.61	Sham	Vehicle	1	3	.	.%
	10.00	Day -4	Sham	Vehicle	1	3.205	.	.%										Total	Sham	Vehicle	6	1.33333	1.21106	0.908295
		Day 16	Sham	Vehicle	1	3.2	.	.%									5.00	1.65	Sham	Vehicle	1	0	.	.%																									5.00
		Total	Sham	Vehicle	2	3.2025	0.00353553	0.00110399										2.36	Sham	Vehicle	1	0	.	.%
	11.00	Day -4	Sham	Vehicle	1	2.185	.	.%										2.44	Sham	Vehicle	1	1	.	.%
		Day 16	Sham	Vehicle	1	3.915	.	.%										2.83	Sham	Vehicle	1	1	.	.%
		Total	Sham	Vehicle	2	3.05	1.22329	0.40108										3.22	Sham	Vehicle	1	2	.	.%
	12.00	Day -4	Sham	Vehicle	1	3.36	.	.%										3.61	Sham	Vehicle	1	2	.	.%
		Day 16	Sham	Vehicle	1	4.185	.	.%										Total	Sham	Vehicle	6	1	0.894427	0.894427
		Total	Sham	Vehicle	2	3.7725	0.583363	0.154636									6.00	1.65	Sham	Vehicle	1	1	.	.%																									6.00
	13.00	Day -4	Endo	Vehicle	1	2.23	.	.%										2.36	Sham	Vehicle	1	0	.	.%
		Day 16	Endo	Vehicle	1	2.77	.	.%										2.44	Sham	Vehicle	1	2	.	.%
		Total	Endo	Vehicle	2	2.5	0.381838	0.152735										2.83	Sham	Vehicle	1	1	.	.%
	14.00	Day -4	Endo	Vehicle	1	1.365	.	.%										3.22	Sham	Vehicle	1	2	.	.%
		Day 16	Endo	Vehicle	1	1.99	.	.%										3.61	Sham	Vehicle	1	3	.	.%
		Total	Endo	Vehicle	2	1.6775	0.441942	0.263453										Total	Sham	Vehicle	6	1.5	1.04881	0.699206
	15.00	Day -4	Endo	Vehicle	1	2.965	.	.%									7.00	1.65	Sham	Vehicle	1	1	.	.%																									7.00
		Day 16	Endo	Vehicle	1	2.145	.	.%										2.36	Sham	Vehicle	1	1	.	.%
		Total	Endo	Vehicle	2	2.555	0.579828	0.226938										2.44	Sham	Vehicle	1	2	.	.%
	16.00	Day -4	Endo	Vehicle	1	2.62	.	.%										2.83	Sham	Vehicle	1	2	.	.%
		Day 16	Endo	Vehicle	1	2.62	.	.%										3.22	Sham	Vehicle	1	2	.	.%
		Total	Endo	Vehicle	2	2.62	0	0										3.61	Sham	Vehicle	1	2	.	.%
	17.00	Day -4	Endo	Vehicle	1	2.77	.	.%										Total	Sham	Vehicle	6	1.66667	0.516398	0.309839
		Day 16	Endo	Vehicle	1	2.775	.	.%									8.00	1.65	Sham	Vehicle	1	0	.	.%																									8.00
		Total	Endo	Vehicle	2	2.7725	0.00353553	0.00127522										2.36	Sham	Vehicle	1	0	.	.%
	18.00	Day -4	Endo	Vehicle	1	2.615	.	.%										2.44	Sham	Vehicle	1	1	.	.%
		Day 16	Endo	Vehicle	1	4.61	.	.%										2.83	Sham	Vehicle	1	2	.	.%
		Total	Endo	Vehicle	2	3.6125	1.41068	0.390499										3.22	Sham	Vehicle	1	2	.	.%
	19.00	Day -4	Endo	Vehicle	1	3.56	.	.%										3.61	Sham	Vehicle	1	3	.	.%
		Day 16	Endo	Vehicle	1	3.56	.	.%										Total	Sham	Vehicle	6	1.33333	1.21106	0.908295
		Total	Endo	Vehicle	2	3.56	0	0									9.00	1.65	Sham	Vehicle	1	0	.	.%																									9.00
	20.00	Day -4	Endo	Vehicle	1	2.185	.	.%										2.36	Sham	Vehicle	1	0	.	.%
		Day 16	Endo	Vehicle	1	1.99	.	.%										2.44	Sham	Vehicle	1	1	.	.%
		Total	Endo	Vehicle	2	2.0875	0.137886	0.0660531										2.83	Sham	Vehicle	1	1	.	.%
	21.00	Day -4	Endo	Vehicle	1	3.945	.	.%										3.22	Sham	Vehicle	1	2	.	.%
		Day 16	Endo	Vehicle	1	1.95	.	.%										3.61	Sham	Vehicle	1	2	.	.%
		Total	Endo	Vehicle	2	2.9475	1.41068	0.478602										Total	Sham	Vehicle	6	1	0.894427	0.894427
	22.00	Day -4	Endo	Vehicle	1	2.58	.	.%									10.00	1.65	Sham	Vehicle	1	0	.	.%																									10.00
		Day 16	Endo	Vehicle	1	2.54	.	.%										2.36	Sham	Vehicle	1	1	.	.%
		Total	Endo	Vehicle	2	2.56	0.0282843	0.0110485										2.44	Sham	Vehicle	1	2	.	.%
	23.00	Day -4	Endo	Vehicle	1	1.405	.	.%										2.83	Sham	Vehicle	1	2	.	.%
		Day 16	Endo	Vehicle	1	2.535	.	.%										3.22	Sham	Vehicle	1	3	.	.%
		Total	Endo	Vehicle	2	1.97	0.799031	0.405599										3.61	Sham	Vehicle	1	2	.	.%
	24.00	Day -4	Endo	Vehicle	1	3.635	.	.%										Total	Sham	Vehicle	6	1.66667	1.0328	0.619677
		Day 16	Endo	Vehicle	1	3.365	.	.%									11.00	1.65	Sham	Vehicle	1	0	.	.%																									11.00
		Total	Endo	Vehicle	2	3.5	0.190919	0.0545482										2.36	Sham	Vehicle	1	0	.	.%
	25.00	Day -4	Endo	AcuteTHC	1	2.03	.	.%										2.44	Sham	Vehicle	1	1	.	.%
		Day 16	Endo	AcuteTHC	1	4.38	.	.%										2.83	Sham	Vehicle	1	2	.	.%
		Total	Endo	AcuteTHC	2	3.205	1.6617	0.518471										3.22	Sham	Vehicle	1	2	.	.%
	26.00	Day -4	Endo	AcuteTHC	1	2.615	.	.%										3.61	Sham	Vehicle	1	2	.	.%
		Day 16	Endo	AcuteTHC	1	2.385	.	.%										Total	Sham	Vehicle	6	1.16667	0.983192	0.842736
		Total	Endo	AcuteTHC	2	2.5	0.162635	0.0650538									12.00	1.65	Sham	Vehicle	1	1	.	.%																									12.00
	27.00	Day -4	Endo	AcuteTHC	1	3.365	.	.%										2.36	Sham	Vehicle	1	0	.	.%
		Day 16	Endo	AcuteTHC	1	1.795	.	.%										2.44	Sham	Vehicle	1	2	.	.%
		Total	Endo	AcuteTHC	2	2.58	1.11016	0.430294										2.83	Sham	Vehicle	1	2	.	.%
	28.00	Day -4	Endo	AcuteTHC	1	3.755	.	.%										3.22	Sham	Vehicle	1	3	.	.%
		Day 16	Endo	AcuteTHC	1	1.41	.	.%										3.61	Sham	Vehicle	1	3	.	.%
		Total	Endo	AcuteTHC	2	2.5825	1.65817	0.642078										Total	Sham	Vehicle	6	1.83333	1.16905	0.637661
	29.00	Day -4	Endo	AcuteTHC	1	2.77	.	.%									13.00	1.65	Endo	Vehicle	1	0	.	.%																									13.00
		Day 16	Endo	AcuteTHC	1	2.735	.	.%										2.36	Endo	Vehicle	1	1	.	.%
		Total	Endo	AcuteTHC	2	2.7525	0.0247487	0.00899137										2.44	Endo	Vehicle	1	2	.	.%
	30.00	Day -4	Endo	AcuteTHC	1	3.915	.	.%										2.83	Endo	Vehicle	1	1	.	.%
		Day 16	Endo	AcuteTHC	1	2.535	.	.%										3.22	Endo	Vehicle	1	1	.	.%
		Total	Endo	AcuteTHC	2	3.225	0.975807	0.302576										3.61	Endo	Vehicle	1	3	.	.%
	31.00	Day -4	Endo	AcuteTHC	1	1.99	.	.%										Total	Endo	Vehicle	6	1.33333	1.0328	0.774597
		Day 16	Endo	AcuteTHC	1	2.19	.	.%									14.00	1.65	Endo	Vehicle	1	0	.	.%																									14.00
		Total	Endo	AcuteTHC	2	2.09	0.141421	0.0676657										2.36	Endo	Vehicle	1	0	.	.%
	32.00	Day -4	Endo	AcuteTHC	1	2.385	.	.%										2.44	Endo	Vehicle	1	0	.	.%
		Day 16	Endo	AcuteTHC	1	2.145	.	.%										2.83	Endo	Vehicle	1	1	.	.%
		Total	Endo	AcuteTHC	2	2.265	0.169706	0.0749252										3.22	Endo	Vehicle	1	1	.	.%
	33.00	Day -4	Endo	AcuteTHC	1	1.6	.	.%										3.61	Endo	Vehicle	1	3	.	.%
		Day 16	Endo	AcuteTHC	1	2.545	.	.%										Total	Endo	Vehicle	6	0.833333	1.16905	1.40285
		Total	Endo	AcuteTHC	2	2.0725	0.668216	0.32242									15.00	1.65	Endo	Vehicle	1	0	.	.%																									15.00
	34.00	Day -4	Endo	7daysTHC	1	4.15	.	.%										2.36	Endo	Vehicle	1	0	.	.%
		Day 16	Endo	7daysTHC	1	4.855	.	.%										2.44	Endo	Vehicle	1	1	.	.%
		Total	Endo	7daysTHC	2	4.5025	0.49851	0.110719										2.83	Endo	Vehicle	1	3	.	.%
	35.00	Day -4	Endo	7daysTHC	1	2.54	.	.%										3.22	Endo	Vehicle	1	2	.	.%
		Day 16	Endo	7daysTHC	1	3.365	.	.%										3.61	Endo	Vehicle	1	4	.	.%
		Total	Endo	7daysTHC	2	2.9525	0.583363	0.197583										Total	Endo	Vehicle	6	1.66667	1.63299	0.979796
	36.00	Day -4	Endo	7daysTHC	1	2.225	.	.%									16.00	1.65	Endo	Vehicle	1	0	.	.%																									16.00
		Day 16	Endo	7daysTHC	1	1.405	.	.%										2.36	Endo	Vehicle	1	1	.	.%
		Total	Endo	7daysTHC	2	1.815	0.579828	0.319464										2.44	Endo	Vehicle	1	2	.	.%
	37.00	Day -4	Endo	7daysTHC	1	3.205	.	.%										2.83	Endo	Vehicle	1	1	.	.%
		Day 16	Endo	7daysTHC	1	1.405	.	.%										3.22	Endo	Vehicle	1	2	.	.%
		Total	Endo	7daysTHC	2	2.305	1.27279	0.552188										3.61	Endo	Vehicle	1	3	.	.%
	38.00	Day -4	Endo	7daysTHC	1	1.755	.	.%										Total	Endo	Vehicle	6	1.5	1.04881	0.699206
		Day 16	Endo	7daysTHC	1	5.715	.	.%									17.00	1.65	Endo	Vehicle	1	0	.	.%																									17.00
		Total	Endo	7daysTHC	2	3.735	2.80014	0.749704										2.36	Endo	Vehicle	1	0	.	.%
	39.00	Day -4	Endo	7daysTHC	1	3.33	.	.%										2.44	Endo	Vehicle	1	1	.	.%
		Day 16	Endo	7daysTHC	1	4.105	.	.%										2.83	Endo	Vehicle	1	2	.	.%
		Total	Endo	7daysTHC	2	3.7175	0.548008	0.147413										3.22	Endo	Vehicle	1	3	.	.%
	40.00	Day -4	Endo	7daysTHC	1	2.345	.	.%										3.61	Endo	Vehicle	1	3	.	.%
		Day 16	Endo	7daysTHC	1	2.54	.	.%										Total	Endo	Vehicle	6	1.5	1.3784	0.918937
		Total	Endo	7daysTHC	2	2.4425	0.137886	0.0564527									18.00	1.65	Endo	Vehicle	1	0	.	.%																									18.00
	41.00	Day -4	Endo	7daysTHC	1	1.99	.	.%										2.36	Endo	Vehicle	1	0	.	.%
		Day 16	Endo	7daysTHC	1	2.19	.	.%										2.44	Endo	Vehicle	1	2	.	.%
		Total	Endo	7daysTHC	2	2.09	0.141421	0.0676657										2.83	Endo	Vehicle	1	2	.	.%
	42.00	Day -4	Endo	7daysTHC	1	3.72	.	.%										3.22	Endo	Vehicle	1	2	.	.%
		Day 16	Endo	7daysTHC	1	3.405	.	.%										3.61	Endo	Vehicle	1	3	.	.%
		Total	Endo	7daysTHC	2	3.5625	0.222739	0.0625231										Total	Endo	Vehicle	6	1.5	1.22474	0.816497
	43.00	Day -4	Endo	7daysTHC	1	1.56	.	.%									19.00	1.65	Endo	Vehicle	1	0	.	.%																									19.00
		Day 16	Endo	7daysTHC	1	1.755	.	.%										2.36	Endo	Vehicle	1	2	.	.%
		Total	Endo	7daysTHC	2	1.6575	0.137886	0.083189										2.44	Endo	Vehicle	1	1	.	.%
	Total	Day -4	Endo	7daysTHC	10	2.682	0.873407	0.325655										2.83	Endo	Vehicle	1	2	.	.%
				AcuteTHC	9	2.71389	0.814255	0.300033										3.22	Endo	Vehicle	1	3	.	.%
				Vehicle	12	2.65625	0.808444	0.304356										3.61	Endo	Vehicle	1	3	.	.%
				Total	31	2.68129	0.803661	0.299729										Total	Endo	Vehicle	6	1.83333	1.16905	0.637661
			Sham	Vehicle	12	2.70292	0.62859	0.23256									20.00	1.65	Endo	Vehicle	1	0	.	.%																									20.00
			Total	Vehicle	24	2.67958	0.708607	0.264447										2.36	Endo	Vehicle	1	0	.	.%
				Total	43	2.68733	0.75161	0.279687										2.44	Endo	Vehicle	1	1	.	.%
		Day 16	Endo	7daysTHC	10	3.074	1.48255	0.482286										2.83	Endo	Vehicle	1	1	.	.%
				AcuteTHC	9	2.45778	0.828953	0.337277										3.22	Endo	Vehicle	1	2	.	.%
				Vehicle	12	2.7375	0.784018	0.286399										3.61	Endo	Vehicle	1	4	.	.%
				Total	31	2.76484	1.06229	0.384214										Total	Endo	Vehicle	6	1.33333	1.50555	1.12916
			Sham	Vehicle	12	3.09208	0.659564	0.213307									21.00	1.65	Endo	Vehicle	1	0	.	.%																									21.00
			Total	Vehicle	24	2.91479	0.731323	0.250901										2.36	Endo	Vehicle	1	1	.	.%
				Total	43	2.85616	0.970585	0.339821										2.44	Endo	Vehicle	1	1	.	.%
		Total	Endo	7daysTHC	20	2.878	1.20121	0.417378										2.83	Endo	Vehicle	1	3	.	.%
				AcuteTHC	18	2.58583	0.807923	0.312442										3.22	Endo	Vehicle	1	3	.	.%
				Vehicle	24	2.69687	0.779926	0.289196										3.61	Endo	Vehicle	1	5	.	.%
				Total	62	2.72306	0.935091	0.343396										Total	Endo	Vehicle	6	2.16667	1.83485	0.846853
			Sham	Vehicle	24	2.8975	0.660709	0.228027									22.00	1.65	Endo	Vehicle	1	1	.	.%																									22.00
			Total	Vehicle	48	2.79719	0.7222	0.258188										2.36	Endo	Vehicle	1	0	.	.%
				Total	86	2.77174	0.867077	0.312827										2.44	Endo	Vehicle	1	2	.	.%
	Totals that are aggregated over either a single category of a variable or a split file variable are omitted.																	2.83	Endo	Vehicle	1	1	.	.%
																		3.22	Endo	Vehicle	1	2	.	.%
	Model Dimensiona																	3.61	Endo	Vehicle	1	3	.	.%
			Number of Levels	Covariance Structure	Number of Parameters	Subject Variables	Number of Subjects											Total	Endo	Vehicle	6	1.5	1.04881	0.699206
	Fixed Effects	Intercept	1		1												23.00	1.65	Endo	Vehicle	1	0	.	.%																									23.00
		Surgery	2		1													2.36	Endo	Vehicle	1	0	.	.%
		Treatment	3		2													2.44	Endo	Vehicle	1	1	.	.%
		Day	2		1													2.83	Endo	Vehicle	1	1	.	.%
		Surgery * Treatment	4		0													3.22	Endo	Vehicle	1	1	.	.%
		Surgery * Day	4		1													3.61	Endo	Vehicle	1	2	.	.%
		Treatment * Day	6		2													Total	Endo	Vehicle	6	0.833333	0.752773	0.903327
		Surgery * Treatment * Day	8		0												24.00	1.65	Endo	Vehicle	1	0	.	.%																									24.00
	Repeated Effects	Day	2	Diagonal	2	Subject	43											2.36	Endo	Vehicle	1	1	.	.%
	Total		32		10													2.44	Endo	Vehicle	1	3	.	.%
	a. Dependent Variable: AUCPAW.																	2.83	Endo	Vehicle	1	2	.	.%
																		3.22	Endo	Vehicle	1	2	.	.%
	Information Criteriaa																	3.61	Endo	Vehicle	1	5	.	.%
	-2 Restricted Log Likelihood	218.64																Total	Endo	Vehicle	6	2.16667	1.7224	0.794955
	Akaike's Information Criterion (AIC)	222.64															25.00	1.65	Endo	7daysTHC	1	0	.	.%																									25.00
	Hurvich and Tsai's Criterion (AICC)	222.8																2.36	Endo	7daysTHC	1	0	.	.%
	Bozdogan's Criterion (CAIC)	229.353																2.44	Endo	7daysTHC	1	2	.	.%
	Schwarz's Bayesian Criterion (BIC)	227.353																2.83	Endo	7daysTHC	1	2	.	.%
	The information criteria are displayed in smaller-is-better forms.																	3.22	Endo	7daysTHC	1	1	.	.%
	a. Dependent Variable: AUCPAW.																	3.61	Endo	7daysTHC	1	2	.	.%
																		Total	Endo	7daysTHC	6	1.16667	0.983192	0.842736
																	26.00	1.65	Endo	7daysTHC	1	0	.	.%																									26.00
	Fixed Effects																	2.36	Endo	7daysTHC	1	0	.	.%
																		2.44	Endo	7daysTHC	1	2	.	.%
	Type III Tests of Fixed Effectsa																	2.83	Endo	7daysTHC	1	2	.	.%
	Source	Numerator df	Denominator df	F	Sig.													3.22	Endo	7daysTHC	1	2	.	.%
	Intercept	1	74.4999	731.323	2.91961e-40													3.61	Endo	7daysTHC	1	3	.	.%
	Surgery	1	74.4999	0.622397	0.432661													Total	Endo	7daysTHC	6	1.5	1.22474	0.816497
	Treatment	2	74.4999	0.538339	0.58597												27.00	1.65	Endo	7daysTHC	1	1	.	.%																									27.00
	Day	1	74.4999	0.812866	0.37018													2.36	Endo	7daysTHC	1	1	.	.%
	Surgery * Treatment	0	.	.	.													2.44	Endo	7daysTHC	1	2	.	.%
	Surgery * Day	1	74.4999	0.366525	0.546744													2.83	Endo	7daysTHC	1	2	.	.%
	Treatment * Day	2	74.4999	0.641013	0.529639													3.22	Endo	7daysTHC	1	2	.	.%
	Surgery * Treatment * Day	0	.	.	.													3.61	Endo	7daysTHC	1	3	.	.%
	a. Dependent Variable: AUCPAW.																	Total	Endo	7daysTHC	6	1.83333	0.752773	0.410603
																	28.00	1.65	Endo	7daysTHC	1	1	.	.%																									28.00
																		2.36	Endo	7daysTHC	1	1	.	.%
	Covariance Parameters																	2.44	Endo	7daysTHC	1	2	.	.%
																		2.83	Endo	7daysTHC	1	2	.	.%
	Estimates of Covariance Parametersa																	3.22	Endo	7daysTHC	1	3	.	.%
	Parameter		Estimate	Std. Error														3.61	Endo	7daysTHC	1	3	.	.%
	Repeated Measures	Var: [Day=Day -4]	0.607831	0.137647														Total	Endo	7daysTHC	6	2	0.894427	0.447214
		Var: [Day=Day 16]	0.944247	0.21383													29.00	1.65	Endo	7daysTHC	1	0	.	.%																									29.00
	a. Dependent Variable: AUCPAW.																	2.36	Endo	7daysTHC	1	0	.	.%
																		2.44	Endo	7daysTHC	1	1	.	.%
																		2.83	Endo	7daysTHC	1	2	.	.%
	Estimated Marginal Means																	3.22	Endo	7daysTHC	1	3	.	.%
																		3.61	Endo	7daysTHC	1	3	.	.%
	1. Grand Meanb																	Total	Endo	7daysTHC	6	1.5	1.3784	0.918937
	Mean	Std. Error	df	95% Confidence Interval													30.00	1.65	Endo	7daysTHC	1	2	.	.%																									30.00
				Lower Bound	Upper Bound													2.36	Endo	7daysTHC	1	1	.	.%
	2.765a	0.0957161	74.4999	2.57385	2.95525													2.44	Endo	7daysTHC	1	2	.	.%
	a. Based on modified population marginal mean. b. Dependent Variable: AUCPAW.																	2.83	Endo	7daysTHC	1	2	.	.%
																		3.22	Endo	7daysTHC	1	3	.	.%
																		3.61	Endo	7daysTHC	1	2	.	.%
	2. Surgery																	Total	Endo	7daysTHC	6	2	0.632456	0.316228
																	31.00	1.65	Endo	7daysTHC	1	0	.	.%																									31.00
	Estimatesb																	2.36	Endo	7daysTHC	1	0	.	.%
	Surgery	Mean	Std. Error	df	95% Confidence Interval													2.44	Endo	7daysTHC	1	1	.	.%
					Lower Bound	Upper Bound												2.83	Endo	7daysTHC	1	1	.	.%
	Endo	2.72024	0.11267	74.4999	2.49576	2.94471												3.22	Endo	7daysTHC	1	2	.	.%
	Sham	2.898a	0.179819	74.4999	2.53924	3.25576												3.61	Endo	7daysTHC	1	3	.	.%
	a. Based on modified population marginal mean. b. Dependent Variable: AUCPAW.																	Total	Endo	7daysTHC	6	1.16667	1.16905	1.00204
																	32.00	1.65	Endo	7daysTHC	1	0	.	.%																									32.00
	Pairwise Comparisonsd																	2.36	Endo	7daysTHC	1	1	.	.%
	(I) Surgery	(J) Surgery	Mean Difference (I-J)	Std. Error	df	Sig.b	95% Confidence Interval for Differenceb											2.44	Endo	7daysTHC	1	1	.	.%
							Lower Bound	Upper Bound										2.83	Endo	7daysTHC	1	1	.	.%
	Endo	Sham	-.177a	0.212201	74.4999	0.406188	-0.600037	0.24551										3.22	Endo	7daysTHC	1	2	.	.%
	Sham	Endo	.177c	0.212201	74.4999	0.406188	-0.24551	0.600037										3.61	Endo	7daysTHC	1	3	.	.%
	Based on estimated marginal means																	Total	Endo	7daysTHC	6	1.33333	1.0328	0.774597
	a. An estimate of the modified population marginal mean (J). b. Adjustment for multiple comparisons: Bonferroni. c. An estimate of the modified population marginal mean (I). d. Dependent Variable: AUCPAW.																33.00	1.65	Endo	7daysTHC	1	0	.	.%																									33.00
																		2.36	Endo	7daysTHC	1	0	.	.%
	Univariate Testsa																	2.44	Endo	7daysTHC	1	1	.	.%
	Numerator df	Denominator df	F	Sig.														2.83	Endo	7daysTHC	1	1	.	.%
	1	74.4999	0.697821	0.406188														3.22	Endo	7daysTHC	1	1	.	.%
	The F tests the effect of Surgery. This test is based on the linearly independent pairwise comparisons among the estimated marginal means.																	3.61	Endo	7daysTHC	1	3	.	.%
	a. Dependent Variable: AUCPAW.																	Total	Endo	7daysTHC	6	1	1.09545	1.09545
																	34.00	1.65	Endo	7daysTHC	1	1	.	.%																									34.00
																		2.36	Endo	7daysTHC	1	2	.	.%
	3. Treatment																	2.44	Endo	7daysTHC	1	2	.	.%
																		2.83	Endo	7daysTHC	1	3	.	.%
	Estimatesb																	3.22	Endo	7daysTHC	1	2	.	.%
	Treatment	Mean	Std. Error	df	95% Confidence Interval													3.61	Endo	7daysTHC	1	3	.	.%
					Lower Bound	Upper Bound												Total	Endo	7daysTHC	6	2.16667	0.752773	0.347434
	7daysTHC	2.878a	0.196982	74.4999	2.48555	3.27045											35.00	1.65	Endo	AcuteTHC	1	1	.	.%																									35.00
	AcuteTHC	2.586a	0.207637	74.4999	2.17215	2.99951												2.36	Endo	AcuteTHC	1	0	.	.%
	Vehicle	2.79719	0.127151	74.4999	2.54386	3.05051												2.44	Endo	AcuteTHC	1	1	.	.%
	a. Based on modified population marginal mean. b. Dependent Variable: AUCPAW.																	2.83	Endo	AcuteTHC	1	2	.	.%
																		3.22	Endo	AcuteTHC	1	2	.	.%
	Pairwise Comparisonsd																	3.61	Endo	AcuteTHC	1	2	.	.%
	(I) Treatment	(J) Treatment	Mean Difference (I-J)	Std. Error	df	Sig.c	95% Confidence Interval for Differencec											Total	Endo	AcuteTHC	6	1.33333	0.816497	0.612372
							Lower Bound	Upper Bound									36.00	1.65	Endo	AcuteTHC	1	0	.	.%																									36.00
	7daysTHC	AcuteTHC	.292a,b	0.286208	74.4999	0.931933	-0.408826	0.993159										2.36	Endo	AcuteTHC	1	0	.	.%
		Vehicle	.081a	0.234456	74.4999	1	-0.493425	0.65505										2.44	Endo	AcuteTHC	1	2	.	.%
	AcuteTHC	7daysTHC	-.292a,b	0.286208	74.4999	0.931933	-0.993159	0.408826										2.83	Endo	AcuteTHC	1	2	.	.%
		Vehicle	-.211a	0.243476	74.4999	1	-0.807686	0.384977										3.22	Endo	AcuteTHC	1	1	.	.%
	Vehicle	7daysTHC	-.081b	0.234456	74.4999	1	-0.65505	0.493425										3.61	Endo	AcuteTHC	1	3	.	.%
		AcuteTHC	.211b	0.243476	74.4999	1	-0.384977	0.807686										Total	Endo	AcuteTHC	6	1.33333	1.21106	0.908295
	Based on estimated marginal means																37.00	1.65	Endo	AcuteTHC	1	0	.	.%																									37.00
	a. An estimate of the modified population marginal mean (I). b. An estimate of the modified population marginal mean (J). c. Adjustment for multiple comparisons: Bonferroni. d. Dependent Variable: AUCPAW.																	2.36	Endo	AcuteTHC	1	1	.	.%
																		2.44	Endo	AcuteTHC	1	2	.	.%
	Univariate Testsa																	2.83	Endo	AcuteTHC	1	3	.	.%
	Numerator df	Denominator df	F	Sig.														3.22	Endo	AcuteTHC	1	2	.	.%
	2	74.4999	0.566344	0.570021														3.61	Endo	AcuteTHC	1	2	.	.%
	The F tests the effect of Treatment. This test is based on the linearly independent pairwise comparisons among the estimated marginal means.																	Total	Endo	AcuteTHC	6	1.66667	1.0328	0.619677
	a. Dependent Variable: AUCPAW.																38.00	1.65	Endo	AcuteTHC	1	0	.	.%																									38.00
																		2.36	Endo	AcuteTHC	1	0	.	.%
																		2.44	Endo	AcuteTHC	1	0	.	.%
	4. Day																	2.83	Endo	AcuteTHC	1	1	.	.%
																		3.22	Endo	AcuteTHC	1	2	.	.%
	Estimatesb																	3.61	Endo	AcuteTHC	1	3	.	.%
	Day	Mean	Std. Error	df	95% Confidence Interval													Total	Endo	AcuteTHC	6	1	1.26491	1.26491
					Lower Bound	Upper Bound											39.00	1.65	Endo	AcuteTHC	1	1	.	.%																									39.00
	Day -4	2.689a	0.119798	39	2.44645	2.93108												2.36	Endo	AcuteTHC	1	2	.	.%
	Day 16	2.840a	0.149314	39	2.53832	3.14236												2.44	Endo	AcuteTHC	1	1	.	.%
	a. Based on modified population marginal mean. b. Dependent Variable: AUCPAW.																	2.83	Endo	AcuteTHC	1	2	.	.%
																		3.22	Endo	AcuteTHC	1	2	.	.%
	Pairwise Comparisonsd																	3.61	Endo	AcuteTHC	1	2	.	.%
	(I) Day	(J) Day	Mean Difference (I-J)	Std. Error	df	Sig.c	95% Confidence Interval for Differencec											Total	Endo	AcuteTHC	6	1.66667	0.516398	0.309839
							Lower Bound	Upper Bound									40.00	1.65	Endo	AcuteTHC	1	1	.	.%																									40.00
	Day -4	Day 16	-.152a,b	0.191432	74.4999	0.43099	-0.532971	0.229818										2.36	Endo	AcuteTHC	1	0	.	.%
	Day 16	Day -4	.152a,b	0.191432	74.4999	0.43099	-0.229818	0.532971										2.44	Endo	AcuteTHC	1	1	.	.%
	Based on estimated marginal means																	2.83	Endo	AcuteTHC	1	1	.	.%
	a. An estimate of the modified population marginal mean (I). b. An estimate of the modified population marginal mean (J). c. Adjustment for multiple comparisons: Bonferroni. d. Dependent Variable: AUCPAW.																	3.22	Endo	AcuteTHC	1	2	.	.%
																		3.61	Endo	AcuteTHC	1	3	.	.%
	Univariate Testsa																	Total	Endo	AcuteTHC	6	1.33333	1.0328	0.774597
	Numerator df	Denominator df	F	Sig.													41.00	1.65	Endo	AcuteTHC	1	0	.	.%																									41.00
	1	74.4999	0.62695	0.43099														2.36	Endo	AcuteTHC	1	0	.	.%
	The F tests the effect of Day. This test is based on the linearly independent pairwise comparisons among the estimated marginal means.																	2.44	Endo	AcuteTHC	1	1	.	.%
	a. Dependent Variable: AUCPAW.																	2.83	Endo	AcuteTHC	1	1	.	.%
																		3.22	Endo	AcuteTHC	1	2	.	.%
																		3.61	Endo	AcuteTHC	1	3	.	.%
	5. Surgery * Treatment																	Total	Endo	AcuteTHC	6	1.16667	1.16905	1.00204
																	42.00	1.65	Endo	AcuteTHC	1	2	.	.%																									42.00
	Estimatesb																	2.36	Endo	AcuteTHC	1	1	.	.%
	Surgery	Treatment	Mean	Std. Error	df	95% Confidence Interval												2.44	Endo	AcuteTHC	1	2	.	.%
						Lower Bound	Upper Bound											2.83	Endo	AcuteTHC	1	2	.	.%
	Endo	7daysTHC	2.878	0.196982	74.4999	2.48555	3.27045											3.22	Endo	AcuteTHC	1	2	.	.%
		AcuteTHC	2.58583	0.207637	74.4999	2.17215	2.99951											3.61	Endo	AcuteTHC	1	3	.	.%
		Vehicle	2.69688	0.179819	74.4999	2.33862	3.05513											Total	Endo	AcuteTHC	6	2	0.632456	0.316228
	Sham	7daysTHC	.a	.	.	.	.										43.00	1.65	Endo	AcuteTHC	1	0	.	.%																									43.00
		AcuteTHC	.a	.	.	.	.											2.36	Endo	AcuteTHC	1	0	.	.%
		Vehicle	2.8975	0.179819	74.4999	2.53924	3.25576											2.44	Endo	AcuteTHC	1	0	.	.%
	a. This level combination of factors is not observed, thus the corresponding population marginal mean is not estimable. b. Dependent Variable: AUCPAW.																	2.83	Endo	AcuteTHC	1	1	.	.%
																		3.22	Endo	AcuteTHC	1	2	.	.%
	Pairwise Comparisonsd																	3.61	Endo	AcuteTHC	1	2	.	.%
	Treatment	(I) Surgery	(J) Surgery	Mean Difference (I-J)	Std. Error	df	Sig.b	95% Confidence Interval for Differenceb										Total	Endo	AcuteTHC	6	0.833333	0.983192	1.17983
								Lower Bound	Upper Bound								Total	1.65	Endo	7daysTHC	10	0.5	0.707107	1.41421																									Total
	7daysTHC	Endo	Sham	.a	.	.	.	.	.											AcuteTHC	9	0.555556	0.726483	1.30767
		Sham	Endo	.c	.	.	.	.	.											Vehicle	12	0.0833333	0.288675	3.4641
	AcuteTHC	Endo	Sham	.a	.	.	.	.	.											Total	31	0.354839	0.608188	1.71398
		Sham	Endo	.c	.	.	.	.	.										Sham	Vehicle	12	0.5	0.6742	1.3484
	Vehicle	Endo	Sham	-0.200625	0.254303	74.4999	0.432661	-0.707278	0.306028										Total	Vehicle	24	0.291667	0.550033	1.88583
		Sham	Endo	0.200625	0.254303	74.4999	0.432661	-0.306028	0.707278											Total	43	0.395349	0.622573	1.57474
	Based on estimated marginal means																	2.36	Endo	7daysTHC	10	0.6	0.699206	1.16534
	a. The level combination of factors in (J) is not observed. b. Adjustment for multiple comparisons: Bonferroni. c. The level combination of factors in (I) is not observed. d. Dependent Variable: AUCPAW.																			AcuteTHC	9	0.444444	0.726483	1.63459
																				Vehicle	12	0.5	0.6742	1.3484
	Univariate Testsa																			Total	31	0.516129	0.676805	1.31131
	Treatment	Numerator df	Denominator df	F	Sig.														Sham	Vehicle	12	0.416667	0.668558	1.60454
	7daysTHC	0	.	.	.														Total	Vehicle	24	0.458333	0.658005	1.43565
	AcuteTHC	0	.	.	.															Total	43	0.488372	0.66805	1.36791
	Vehicle	1	74.4999	0.622397	0.432661													2.44	Endo	7daysTHC	10	1.6	0.516398	0.322749
	Each F tests the simple effects of Surgery within each level combination of the other effects shown. These tests are based on the estimable linearly independent pairwise comparisons among the estimated marginal means.																			AcuteTHC	9	1.11111	0.781736	0.703562
	a. Dependent Variable: AUCPAW.																			Vehicle	12	1.41667	0.792961	0.559738
																				Total	31	1.3871	0.715422	0.515769
																			Sham	Vehicle	12	1.33333	0.492366	0.369274
	6. Surgery * Treatment																		Total	Vehicle	24	1.375	0.646899	0.470472
																				Total	43	1.37209	0.655499	0.477737
	Estimatesb																	2.83	Endo	7daysTHC	10	1.8	0.632456	0.351364
	Surgery	Treatment	Mean	Std. Error	df	95% Confidence Interval														AcuteTHC	9	1.66667	0.707107	0.424264
						Lower Bound	Upper Bound													Vehicle	12	1.66667	0.778499	0.467099
	Endo	7daysTHC	2.878	0.196982	74.4999	2.48555	3.27045													Total	31	1.70968	0.69251	0.405053
		AcuteTHC	2.58583	0.207637	74.4999	2.17215	2.99951												Sham	Vehicle	12	1.75	0.452267	0.258438
		Vehicle	2.69688	0.179819	74.4999	2.33862	3.05513												Total	Vehicle	24	1.70833	0.624094	0.365323
	Sham	7daysTHC	.a	.	.	.	.													Total	43	1.72093	0.629648	0.365876
		AcuteTHC	.a	.	.	.	.											3.22	Endo	7daysTHC	10	2.1	0.737865	0.351364
		Vehicle	2.8975	0.179819	74.4999	2.53924	3.25576													AcuteTHC	9	1.88889	0.333333	0.176471
	a. This level combination of factors is not observed, thus the corresponding population marginal mean is not estimable. b. Dependent Variable: AUCPAW.																			Vehicle	12	2	0.738549	0.369274
																				Total	31	2	0.632456	0.316228
	Pairwise Comparisonsd																		Sham	Vehicle	12	2.16667	0.389249	0.179654
	Surgery	(I) Treatment	(J) Treatment	Mean Difference (I-J)	Std. Error	df	Sig.a	95% Confidence Interval for Differencea											Total	Vehicle	24	2.08333	0.583592	0.280124
								Lower Bound	Upper Bound											Total	43	2.04651	0.575429	0.281176
	Endo	7daysTHC	AcuteTHC	0.292167	0.286208	74.4999	0.931933	-0.408826	0.993159									3.61	Endo	7daysTHC	10	2.8	0.421637	0.150585
			Vehicle	0.181125	0.266715	74.4999	1	-0.472124	0.834374											AcuteTHC	9	2.55556	0.527046	0.206235
		AcuteTHC	7daysTHC	-0.292167	0.286208	74.4999	0.931933	-0.993159	0.408826											Vehicle	12	3.41667	0.900337	0.263513
			Vehicle	-0.111042	0.274678	74.4999	1	-0.783794	0.561711											Total	31	2.96774	0.752058	0.253411
		Vehicle	7daysTHC	-0.181125	0.266715	74.4999	1	-0.834374	0.472124										Sham	Vehicle	12	2.66667	0.651339	0.244252
			AcuteTHC	0.111042	0.274678	74.4999	1	-0.561711	0.783794										Total	Vehicle	24	3.04167	0.858673	0.282303
	Sham	7daysTHC	AcuteTHC	.b,c	.	.	.	.	.											Total	43	2.88372	0.7306	0.253353
			Vehicle	.b	.	.	.	.	.									Total	Endo	7daysTHC	60	1.56667	1.01458	0.647606
		AcuteTHC	7daysTHC	.b,c	.	.	.	.	.											AcuteTHC	54	1.37037	0.977025	0.712964
			Vehicle	.b	.	.	.	.	.											Vehicle	72	1.51389	1.2891	0.851515
		Vehicle	7daysTHC	.c	.	.	.	.	.											Total	186	1.48925	1.11617	0.749484
			AcuteTHC	.c	.	.	.	.	.										Sham	Vehicle	72	1.47222	0.992539	0.674177
	Based on estimated marginal means																		Total	Vehicle	144	1.49306	1.14658	0.767939
	a. Adjustment for multiple comparisons: Bonferroni. b. The level combination of factors in (I) is not observed. c. The level combination of factors in (J) is not observed. d. Dependent Variable: AUCPAW.																			Total	258	1.4845	1.08121	0.728336
																	Totals that are aggregated over either a single category of a variable or a split file variable are omitted.																																Totals that are aggregated over either a single category of a variable or a split file variable are omitted.
	Univariate Testsa
	Surgery	Numerator df	Denominator df	F	Sig.												Model Dimensiona																																Model Dimensiona
	Endo	2	74.4999	0.538339	0.58597														Number of Levels	Covariance Structure	Number of Parameters	Subject Variables	Number of Subjects
	Sham	0	.	.	.												Fixed Effects	Intercept	1		1																												Fixed Effects
	Each F tests the simple effects of Treatment within each level combination of the other effects shown. These tests are based on the estimable linearly independent pairwise comparisons among the estimated marginal means.																	Surgery	2		1
	a. Dependent Variable: AUCPAW.																	Treatment	3		2
																		Filament	6		5
																		Surgery * Treatment	4		0
	7. Surgery * Day																	Surgery * Filament	12		5
																		Treatment * Filament	18		10
	Estimatesb																	Surgery * Treatment * Filament	24		0
	Surgery	Day	Mean	Std. Error	df	95% Confidence Interval											Repeated Effects	Filament	6	Diagonal	6	Subject	43																										Repeated Effects
						Lower Bound	Upper Bound										Total		76		30																												Total
	Endo	Day -4	2.68405	0.141017	39	2.39881	2.96928										a. Dependent Variable: Daybasalpaw.																																a. Dependent Variable: Day16paw.
		Day 16	2.75643	0.175761	39	2.40092	3.11194
	Sham	Day -4	2.703a	0.225061	39	2.24769	3.15815										Information Criteriaa																																Information Criteriaa
		Day 16	3.092a	0.280513	39	2.52469	3.65947										-2 Restricted Log Likelihood	514.509																															-2 Restricted Log Likelihood
	a. Based on modified population marginal mean. b. Dependent Variable: AUCPAW.																Akaike's Information Criterion (AIC)	526.509																															Akaike's Information Criterion (AIC)
																	Hurvich and Tsai's Criterion (AICC)	526.879																															Hurvich and Tsai's Criterion (AICC)
	Pairwise Comparisonsd																Bozdogan's Criterion (CAIC)	553.241																															Bozdogan's Criterion (CAIC)
	Day	(I) Surgery	(J) Surgery	Mean Difference (I-J)	Std. Error	df	Sig.b	95% Confidence Interval for Differenceb									Schwarz's Bayesian Criterion (BIC)	547.241																															Schwarz's Bayesian Criterion (BIC)
								Lower Bound	Upper Bound								The information criteria are displayed in smaller-is-better forms.																																The information criteria are displayed in smaller-is-better forms.
	Day -4	Endo	Sham	-.019a	0.265591	39	0.943721	-0.556078	0.518338								a. Dependent Variable: Daybasalpaw.																																a. Dependent Variable: Day16paw.
		Sham	Endo	.019c	0.265591	39	0.943721	-0.518338	0.556078
	Day 16	Endo	Sham	-.336a	0.331028	39	0.316839	-1.00522	0.333909
		Sham	Endo	.336c	0.331028	39	0.316839	-0.333909	1.00522								Fixed Effects																																Fixed Effects
	Based on estimated marginal means
	a. An estimate of the modified population marginal mean (J). b. Adjustment for multiple comparisons: Bonferroni. c. An estimate of the modified population marginal mean (I). d. Dependent Variable: AUCPAW.																Type III Tests of Fixed Effectsa																																Type III Tests of Fixed Effectsa
																	Source	Numerator df	Denominator df	F	Sig.																												Source
	Univariate Testsa																Intercept	1	231.449	1142.24	1.79392e-91																												Intercept
	Day	Numerator df	Denominator df	F	Sig.												Surgery	1	231.449	0.150111	0.698785																												Surgery
	Day -4	1	39	0.00504818	0.943721												Treatment	2	231.449	1.40079	0.248484																												Treatment
	Day 16	1	39	1.02817	0.316839												Filament	5	71.3147	69.2639	5.464e-26																												Filament
	Each F tests the simple effects of Surgery within each level combination of the other effects shown. These tests are based on the linearly independent pairwise comparisons among the estimated marginal means.																Surgery * Treatment	0	.	.	.																												Surgery * Treatment
	a. Dependent Variable: AUCPAW.																Surgery * Filament	5	71.3147	2.21506	0.0620727																												Surgery * Filament
																	Treatment * Filament	10	71.3147	1.45841	0.173348																												Treatment * Filament
																	Surgery * Treatment * Filament	0	.	.	.																												Surgery * Treatment * Filament
	8. Surgery * Day																a. Dependent Variable: Daybasalpaw.																																a. Dependent Variable: Day16paw.
	Estimatesb
	Surgery	Day	Mean	Std. Error	df	95% Confidence Interval											Covariance Parameters																																Covariance Parameters
						Lower Bound	Upper Bound
	Endo	Day -4	2.68405	0.141017	39	2.39881	2.96928										Estimates of Covariance Parametersa																																Estimates of Covariance Parametersa
		Day 16	2.75643	0.175761	39	2.40092	3.11194										Parameter		Estimate	Std. Error																													Parameter
	Sham	Day -4	2.703a	0.225061	39	2.24769	3.15815										Repeated Measures	Var: [Filament=1.65]	0.375356	0.0850014																													Repeated Measures
		Day 16	3.092a	0.280513	39	2.52469	3.65947											Var: [Filament=2.36]	0.475356	0.107647
	a. Based on modified population marginal mean. b. Dependent Variable: AUCPAW.																	Var: [Filament=2.44]	0.432621	0.0979694
																		Var: [Filament=2.83]	0.423504	0.0959048
	Pairwise Comparisonsd																	Var: [Filament=3.22]	0.345014	0.0781303
	Surgery	(I) Day	(J) Day	Mean Difference (I-J)	Std. Error	df	Sig.a	95% Confidence Interval for Differencea										Var: [Filament=3.61]	0.446296	0.101066
								Lower Bound	Upper Bound								a. Dependent Variable: Daybasalpaw.																																a. Dependent Variable: Day16paw.
	Endo	Day -4	Day 16	-0.0723796	0.225339	74.4999	0.748956	-0.521328	0.376569
		Day 16	Day -4	0.0723796	0.225339	74.4999	0.748956	-0.376569	0.521328
	Sham	Day -4	Day 16	-.389b,c	0.359639	74.4999	0.282696	-1.10568	0.327349								Estimated Marginal Means																																Estimated Marginal Means
		Day 16	Day -4	.389b,c	0.359639	74.4999	0.282696	-0.327349	1.10568
	Based on estimated marginal means																1. Grand Meanb																																1. Grand Meanb
	a. Adjustment for multiple comparisons: Bonferroni. b. An estimate of the modified population marginal mean (I). c. An estimate of the modified population marginal mean (J). d. Dependent Variable: AUCPAW.																Mean	Std. Error	df	95% Confidence Interval																													Mean
																				Lower Bound	Upper Bound
	Univariate Testsa																1.481a	0.0404777	231.449	1.40104	1.56054																												1.535a
	Surgery	Numerator df	Denominator df	F	Sig.												a. Based on modified population marginal mean. b. Dependent Variable: Daybasalpaw.																																a. Based on modified population marginal mean. b. Dependent Variable: Day16paw.
	Endo	1	74.4999	0.103171	0.748956
	Sham	1	74.4999	1.17095	0.282696
	Each F tests the simple effects of Day within each level combination of the other effects shown. These tests are based on the linearly independent pairwise comparisons among the estimated marginal means.																2. Surgery																																2. Surgery
	a. Dependent Variable: AUCPAW.
																	Estimatesb																																Estimatesb
																	Surgery	Mean	Std. Error	df	95% Confidence Interval																												Surgery
	9. Treatment * Day																				Lower Bound	Upper Bound
																	Endo	1.48364	0.0476473	231.449	1.38976	1.57752																											Endo
	Estimatesb																Sham	1.472a	0.0760444	231.449	1.32239	1.62205																											Sham
	Treatment	Day	Mean	Std. Error	df	95% Confidence Interval											a. Based on modified population marginal mean. b. Dependent Variable: Daybasalpaw.																																a. Based on modified population marginal mean. b. Dependent Variable: Day16paw.
						Lower Bound	Upper Bound
	7daysTHC	Day -4	2.682a	0.246542	39	2.18332	3.18068										Pairwise Comparisonsd																																Pairwise Comparisonsd
		Day 16	3.074a	0.307286	39	2.45246	3.69554										(I) Surgery	(J) Surgery	Mean Difference (I-J)	Std. Error	df	Sig.b	95% Confidence Interval for Differenceb																										(I) Surgery
	AcuteTHC	Day -4	2.714a	0.259878	39	2.18824	3.23954																Lower Bound	Upper Bound
		Day 16	2.458a	0.323908	39	1.80261	3.11294										Endo	Sham	.011a	0.0897386	231.449	0.898848	-0.165389	0.188229																									Endo
	Vehicle	Day -4	2.67958	0.159142	39	2.35769	3.00148										Sham	Endo	-.011c	0.0897386	231.449	0.898848	-0.188229	0.165389																									Sham
		Day 16	2.91479	0.198352	39	2.51359	3.316										Based on estimated marginal means																																Based on estimated marginal means
	a. Based on modified population marginal mean. b. Dependent Variable: AUCPAW.																a. An estimate of the modified population marginal mean (J). b. Adjustment for multiple comparisons: Bonferroni. c. An estimate of the modified population marginal mean (I). d. Dependent Variable: Daybasalpaw.																																a. An estimate of the modified population marginal mean (J). b. Adjustment for multiple comparisons: Bonferroni. c. An estimate of the modified population marginal mean (I). d. Dependent Variable: Day16paw.
	Pairwise Comparisonsd																Univariate Testsa																																Univariate Testsa
	Day	(I) Treatment	(J) Treatment	Mean Difference (I-J)	Std. Error	df	Sig.c	95% Confidence Interval for Differencec									Numerator df	Denominator df	F	Sig.																													Numerator df
								Lower Bound	Upper Bound								1	231.449	0.016194	0.898848																													1
	Day -4	7daysTHC	AcuteTHC	-.032a,b	0.358218	39	1	-0.928027	0.864249								The F tests the effect of Surgery. This test is based on the linearly independent pairwise comparisons among the estimated marginal means.																																The F tests the effect of Surgery. This test is based on the linearly independent pairwise comparisons among the estimated marginal means.
			Vehicle	.002a	0.293444	39	1	-0.73168	0.736514								a. Dependent Variable: Daybasalpaw.																																a. Dependent Variable: Day16paw.
		AcuteTHC	7daysTHC	.032a,b	0.358218	39	1	-0.864249	0.928027
			Vehicle	.034a	0.304735	39	1	-0.728036	0.796647
		Vehicle	7daysTHC	-.002b	0.293444	39	1	-0.736514	0.73168								3. Treatment																																3. Treatment
			AcuteTHC	-.034b	0.304735	39	1	-0.796647	0.728036
	Day 16	7daysTHC	AcuteTHC	.616a,b	0.446476	39	0.526167	-0.500709	1.73315								Estimatesb																																Estimatesb
			Vehicle	.159a	0.365744	39	1	-0.755757	1.07417								Treatment	Mean	Std. Error	df	95% Confidence Interval																												Treatment
		AcuteTHC	7daysTHC	-.616a,b	0.446476	39	0.526167	-1.73315	0.500709												Lower Bound	Upper Bound
			Vehicle	-.457a	0.379816	39	0.708397	-1.40718	0.493155								7daysTHC	1.567a	0.0833025	231.449	1.40254	1.73079																											7daysTHC
		Vehicle	7daysTHC	-.159b	0.365744	39	1	-1.07417	0.755757								AcuteTHC	1.370a	0.0878085	231.449	1.19736	1.54338																											AcuteTHC
			AcuteTHC	.457b	0.379816	39	0.708397	-0.493155	1.40718								Vehicle	1.49306	0.0537715	231.449	1.38711	1.599																											Vehicle
	Based on estimated marginal means																a. Based on modified population marginal mean. b. Dependent Variable: Daybasalpaw.																																a. Based on modified population marginal mean. b. Dependent Variable: Day16paw.
	a. An estimate of the modified population marginal mean (I). b. An estimate of the modified population marginal mean (J). c. Adjustment for multiple comparisons: Bonferroni. d. Dependent Variable: AUCPAW.
																	Pairwise Comparisonsd																																Pairwise Comparisonsd
	Univariate Testsa																(I) Treatment	(J) Treatment	Mean Difference (I-J)	Std. Error	df	Sig.c	95% Confidence Interval for Differencec																										(I) Treatment
	Day	Numerator df	Denominator df	F	Sig.																		Lower Bound	Upper Bound
	Day -4	2	39	0.00664059	0.993383												7daysTHC	AcuteTHC	.196a,b	0.121036	231.449	0.318619	-0.095582	0.488175																									7daysTHC
	Day 16	2	39	1.05133	0.359168													Vehicle	.074a	0.0991498	231.449	1	-0.165489	0.312711
	Each F tests the simple effects of Treatment within each level combination of the other effects shown. These tests are based on the linearly independent pairwise comparisons among the estimated marginal means.																AcuteTHC	7daysTHC	-.196a,b	0.121036	231.449	0.318619	-0.488175	0.095582																									AcuteTHC
	a. Dependent Variable: AUCPAW.																	Vehicle	-.123a	0.102965	231.449	0.704001	-0.370985	0.125615
																	Vehicle	7daysTHC	-.074b	0.0991498	231.449	1	-0.312711	0.165489																									Vehicle
																		AcuteTHC	.123b	0.102965	231.449	0.704001	-0.125615	0.370985
	10. Treatment * Day																Based on estimated marginal means																																Based on estimated marginal means
																	a. An estimate of the modified population marginal mean (I). b. An estimate of the modified population marginal mean (J). c. Adjustment for multiple comparisons: Bonferroni. d. Dependent Variable: Daybasalpaw.																																a. An estimate of the modified population marginal mean (I). b. An estimate of the modified population marginal mean (J). c. Adjustment for multiple comparisons: Bonferroni. d. Dependent Variable: Day16paw.
	Estimatesb
	Treatment	Day	Mean	Std. Error	df	95% Confidence Interval											Univariate Testsa																																Univariate Testsa
						Lower Bound	Upper Bound										Numerator df	Denominator df	F	Sig.																													Numerator df
	7daysTHC	Day -4	2.682a	0.246542	39	2.18332	3.18068										2	231.449	1.3438	0.26288																													2
		Day 16	3.074a	0.307286	39	2.45246	3.69554										The F tests the effect of Treatment. This test is based on the linearly independent pairwise comparisons among the estimated marginal means.																																The F tests the effect of Treatment. This test is based on the linearly independent pairwise comparisons among the estimated marginal means.
	AcuteTHC	Day -4	2.714a	0.259878	39	2.18824	3.23954										a. Dependent Variable: Daybasalpaw.																																a. Dependent Variable: Day16paw.
		Day 16	2.458a	0.323908	39	1.80261	3.11294
	Vehicle	Day -4	2.67958	0.159142	39	2.35769	3.00148
		Day 16	2.91479	0.198352	39	2.51359	3.316										4. Filament																																4. Filament
	a. Based on modified population marginal mean. b. Dependent Variable: AUCPAW.
																	Estimatesb																																Estimatesb
	Pairwise Comparisonsd																Filament	Mean	Std. Error	df	95% Confidence Interval																												Filament
	Treatment	(I) Day	(J) Day	Mean Difference (I-J)	Std. Error	df	Sig.c	95% Confidence Interval for Differencec													Lower Bound	Upper Bound
								Lower Bound	Upper Bound								1.65	.410a	0.0941413	39	0.219304	0.600141																											1.65
	7daysTHC	Day -4	Day 16	-.392a,b	0.393964	74.4999	0.32295	-1.1769	0.392904								2.36	.490a	0.105942	39	0.27599	0.704565																											2.36
		Day 16	Day -4	.392a,b	0.393964	74.4999	0.32295	-0.392904	1.1769								2.44	1.365a	0.101068	39	1.16085	1.56971																											2.44
	AcuteTHC	Day -4	Day 16	.256a,b	0.415275	74.4999	0.539295	-0.57125	1.08347								2.83	1.721a	0.099997	39	1.51857	1.9231																											2.83
		Day 16	Day -4	-.256a,b	0.415275	74.4999	0.539295	-1.08347	0.57125								3.22	2.039a	0.0902561	39	1.85633	2.22145																											3.22
	Vehicle	Day -4	Day 16	-0.235208	0.254303	74.4999	0.357997	-0.741861	0.271445								3.61	2.860a	0.102653	39	2.65209	3.06736																											3.61
		Day 16	Day -4	0.235208	0.254303	74.4999	0.357997	-0.271445	0.741861								a. Based on modified population marginal mean. b. Dependent Variable: Daybasalpaw.																																a. Based on modified population marginal mean. b. Dependent Variable: Day16paw.
	Based on estimated marginal means
	a. An estimate of the modified population marginal mean (I). b. An estimate of the modified population marginal mean (J). c. Adjustment for multiple comparisons: Bonferroni. d. Dependent Variable: AUCPAW.																Pairwise Comparisonsd																																Pairwise Comparisonsd
																	(I) Filament	(J) Filament	Mean Difference (I-J)	Std. Error	df	Sig.c	95% Confidence Interval for Differencec																										(I) Filament
	Univariate Testsa																						Lower Bound	Upper Bound
	Treatment	Numerator df	Denominator df	F	Sig.												1.65	2.36	-.081a,b	0.141726	76.9369	1	-0.50993	0.348819																									1.65
	7daysTHC	1	74.4999	0.990053	0.32295													2.44	-.956a,b,*	0.13812	77.6101	1.72411e-08	-1.37389	-0.537221
	AcuteTHC	1	74.4999	0.380352	0.539295													2.83	-1.311a,b,*	0.137339	77.7177	1.46437e-13	-1.72706	-0.895162
	Vehicle	1	74.4999	0.855466	0.357997													3.22	-1.629a,b,*	0.130418	77.8619	4.14907e-19	-2.02413	-1.2342
	Each F tests the simple effects of Day within each level combination of the other effects shown. These tests are based on the linearly independent pairwise comparisons among the estimated marginal means.																	3.61	-2.450a,b,*	0.139284	77.4229	1.36031e-27	-2.87189	-2.02811
	a. Dependent Variable: AUCPAW.																2.36	1.65	.081a,b	0.141726	76.9369	1	-0.348819	0.50993																									2.36
																		2.44	-.875a,b,*	0.146418	77.8276	9.7398e-07	-1.31843	-0.431572
																		2.83	-1.231a,b,*	0.145681	77.7413	1.96315e-11	-1.67177	-0.789344
	11. Surgery * Treatment * Day																	3.22	-1.549a,b,*	0.139176	76.0795	1.89691e-16	-1.97041	-1.12681
																		3.61	-2.369a,b,*	0.147517	77.9225	2.90342e-25	-2.81618	-1.92271
	Estimatesb																2.44	1.65	.956a,b,*	0.13812	77.6101	1.72411e-08	0.537221	1.37389																									2.44
	Surgery	Treatment	Day	Mean	Std. Error	df	95% Confidence Interval											2.36	.875a,b,*	0.146418	77.8276	9.7398e-07	0.431572	1.31843
							Lower Bound	Upper Bound										2.83	-.356a,b	0.142176	77.9912	0.217313	-0.786108	0.0749964
	Endo	7daysTHC	Day -4	2.682	0.246542	39	2.18332	3.18068										3.22	-.674a,b,*	0.135502	77.0224	5.89624e-05	-1.08412	-0.263107
			Day 16	3.074	0.307286	39	2.45246	3.69554										3.61	-1.494a,b,*	0.144056	77.9811	3.6441e-15	-1.93069	-1.0582
		AcuteTHC	Day -4	2.71389	0.259878	39	2.18824	3.23954									2.83	1.65	1.311a,b,*	0.137339	77.7177	1.46437e-13	0.895162	1.72706																									2.83
			Day 16	2.45778	0.323908	39	1.80261	3.11294										2.36	1.231a,b,*	0.145681	77.7413	1.96315e-11	0.789344	1.67177
		Vehicle	Day -4	2.65625	0.225061	39	2.20102	3.11148										2.44	.356a,b	0.142176	77.9912	0.217313	-0.0749964	0.786108
			Day 16	2.7375	0.280513	39	2.17011	3.30489										3.22	-.318a,b	0.134706	77.1948	0.311152	-0.726117	0.0900061
	Sham	7daysTHC	Day -4	.a	.	.	.	.										3.61	-1.139a,b,*	0.143307	77.9465	1.79361e-10	-1.57287	-0.704904
			Day 16	.a	.	.	.	.									3.22	1.65	1.629a,b,*	0.130418	77.8619	4.14907e-19	1.2342	2.02413																									3.22
		AcuteTHC	Day -4	.a	.	.	.	.										2.36	1.549a,b,*	0.139176	76.0795	1.89691e-16	1.12681	1.97041
			Day 16	.a	.	.	.	.										2.44	.674a,b,*	0.135502	77.0224	5.89624e-05	0.263107	1.08412
		Vehicle	Day -4	2.70292	0.225061	39	2.24769	3.15815										2.83	.318a,b	0.134706	77.1948	0.311152	-0.0900061	0.726117
			Day 16	3.09208	0.280513	39	2.52469	3.65947										3.61	-.821a,b,*	0.136688	76.7428	8.94494e-07	-1.23498	-0.406687
	a. This level combination of factors is not observed, thus the corresponding population marginal mean is not estimable. b. Dependent Variable: AUCPAW.																3.61	1.65	2.450a,b,*	0.139284	77.4229	1.36031e-27	2.02811	2.87189																									3.61
																		2.36	2.369a,b,*	0.147517	77.9225	2.90342e-25	1.92271	2.81618
	Pairwise Comparisonsd																	2.44	1.494a,b,*	0.144056	77.9811	3.6441e-15	1.0582	1.93069
	Treatment	Day	(I) Surgery	(J) Surgery	Mean Difference (I-J)	Std. Error	df	Sig.b	95% Confidence Interval for Differenceb									2.83	1.139a,b,*	0.143307	77.9465	1.79361e-10	0.704904	1.57287
									Lower Bound	Upper Bound								3.22	.821a,b,*	0.136688	76.7428	8.94494e-07	0.406687	1.23498
	7daysTHC	Day -4	Endo	Sham	.a	.	.	.	.	.							Based on estimated marginal means																																Based on estimated marginal means
			Sham	Endo	.c	.	.	.	.	.							a. An estimate of the modified population marginal mean (I). b. An estimate of the modified population marginal mean (J). c. Adjustment for multiple comparisons: Bonferroni. *. The mean difference is significant at the .05 level. d. Dependent Variable: Daybasalpaw.																																a. An estimate of the modified population marginal mean (I). b. An estimate of the modified population marginal mean (J). c. Adjustment for multiple comparisons: Bonferroni. *. The mean difference is significant at the .05 level. d. Dependent Variable: Day16paw.
		Day 16	Endo	Sham	.a	.	.	.	.	.
			Sham	Endo	.c	.	.	.	.	.							Univariate Testsa																																Univariate Testsa
	AcuteTHC	Day -4	Endo	Sham	.a	.	.	.	.	.							Numerator df	Denominator df	F	Sig.																													Numerator df
			Sham	Endo	.c	.	.	.	.	.							5	68.7346	88.5184	1.44799e-28																													5
		Day 16	Endo	Sham	.a	.	.	.	.	.							The F tests the effect of Filament. This test is based on the linearly independent pairwise comparisons among the estimated marginal means.																																The F tests the effect of Filament. This test is based on the linearly independent pairwise comparisons among the estimated marginal means.
			Sham	Endo	.c	.	.	.	.	.							a. Dependent Variable: Daybasalpaw.																																a. Dependent Variable: Day16paw.
	Vehicle	Day -4	Endo	Sham	-0.0466667	0.318285	39	0.884188	-0.690459	0.597125
			Sham	Endo	0.0466667	0.318285	39	0.884188	-0.597125	0.690459
		Day 16	Endo	Sham	-0.354583	0.396705	39	0.3769	-1.15699	0.447827							5. Surgery * Treatment																																5. Surgery * Treatment
			Sham	Endo	0.354583	0.396705	39	0.3769	-0.447827	1.15699
	Based on estimated marginal means																Estimatesb																																Estimatesb
	a. The level combination of factors in (J) is not observed. b. Adjustment for multiple comparisons: Bonferroni. c. The level combination of factors in (I) is not observed. d. Dependent Variable: AUCPAW.																Surgery	Treatment	Mean	Std. Error	df	95% Confidence Interval																											Surgery
																						Lower Bound	Upper Bound
	Univariate Testsa																Endo	7daysTHC	1.56667	0.0833025	231.449	1.40254	1.73079																										Endo
	Treatment	Day	Numerator df	Denominator df	F	Sig.												AcuteTHC	1.37037	0.0878085	231.449	1.19736	1.54338
	7daysTHC	Day -4	0	.	.	.												Vehicle	1.51389	0.0760444	231.449	1.36406	1.66372
		Day 16	0	.	.	.											Sham	7daysTHC	.a	.	.	.	.																										Sham
	AcuteTHC	Day -4	0	.	.	.												AcuteTHC	.a	.	.	.	.
		Day 16	0	.	.	.												Vehicle	1.47222	0.0760444	231.449	1.32239	1.62205
	Vehicle	Day -4	1	39	0.0214972	0.884188											a. This level combination of factors is not observed, thus the corresponding population marginal mean is not estimable. b. Dependent Variable: Daybasalpaw.																																a. This level combination of factors is not observed, thus the corresponding population marginal mean is not estimable. b. Dependent Variable: Day16paw.
		Day 16	1	39	0.798918	0.3769
	Each F tests the simple effects of Surgery within each level combination of the other effects shown. These tests are based on the estimable linearly independent pairwise comparisons among the estimated marginal means.																Pairwise Comparisonsd																																Pairwise Comparisonsd
	a. Dependent Variable: AUCPAW.																Treatment	(I) Surgery	(J) Surgery	Mean Difference (I-J)	Std. Error	df	Sig.b	95% Confidence Interval for Differenceb																									Treatment
																								Lower Bound	Upper Bound
																	7daysTHC	Endo	Sham	.a	.	.	.	.	.																								7daysTHC
	12. Surgery * Treatment * Day																	Sham	Endo	.c	.	.	.	.	.
																	AcuteTHC	Endo	Sham	.a	.	.	.	.	.																								AcuteTHC
	Estimatesb																	Sham	Endo	.c	.	.	.	.	.
	Surgery	Treatment	Day	Mean	Std. Error	df	95% Confidence Interval										Vehicle	Endo	Sham	0.0416667	0.107543	231.449	0.698785	-0.170222	0.253555																								Vehicle
							Lower Bound	Upper Bound										Sham	Endo	-0.0416667	0.107543	231.449	0.698785	-0.253555	0.170222
	Endo	7daysTHC	Day -4	2.682	0.246542	39	2.18332	3.18068									Based on estimated marginal means																																Based on estimated marginal means
			Day 16	3.074	0.307286	39	2.45246	3.69554									a. The level combination of factors in (J) is not observed. b. Adjustment for multiple comparisons: Bonferroni. c. The level combination of factors in (I) is not observed. d. Dependent Variable: Daybasalpaw.																																a. The level combination of factors in (J) is not observed. b. Adjustment for multiple comparisons: Bonferroni. c. The level combination of factors in (I) is not observed. d. Dependent Variable: Day16paw.
		AcuteTHC	Day -4	2.71389	0.259878	39	2.18824	3.23954
			Day 16	2.45778	0.323908	39	1.80261	3.11294									Univariate Testsa																																Univariate Testsa
		Vehicle	Day -4	2.65625	0.225061	39	2.20102	3.11148									Treatment	Numerator df	Denominator df	F	Sig.																												Treatment
			Day 16	2.7375	0.280513	39	2.17011	3.30489									7daysTHC	0	.	.	.																												7daysTHC
	Sham	7daysTHC	Day -4	.a	.	.	.	.									AcuteTHC	0	.	.	.																												AcuteTHC
			Day 16	.a	.	.	.	.									Vehicle	1	231.449	0.150111	0.698785																												Vehicle
		AcuteTHC	Day -4	.a	.	.	.	.									Each F tests the simple effects of Surgery within each level combination of the other effects shown. These tests are based on the estimable linearly independent pairwise comparisons among the estimated marginal means.																																Each F tests the simple effects of Surgery within each level combination of the other effects shown. These tests are based on the estimable linearly independent pairwise comparisons among the estimated marginal means.
			Day 16	.a	.	.	.	.									a. Dependent Variable: Daybasalpaw.																																a. Dependent Variable: Day16paw.
		Vehicle	Day -4	2.70292	0.225061	39	2.24769	3.15815
			Day 16	3.09208	0.280513	39	2.52469	3.65947
	a. This level combination of factors is not observed, thus the corresponding population marginal mean is not estimable. b. Dependent Variable: AUCPAW.																6. Surgery * Treatment																																6. Surgery * Treatment
	Pairwise Comparisonsd																Estimatesb																																Estimatesb
	Surgery	Day	(I) Treatment	(J) Treatment	Mean Difference (I-J)	Std. Error	df	Sig.a	95% Confidence Interval for Differencea								Surgery	Treatment	Mean	Std. Error	df	95% Confidence Interval																											Surgery
									Lower Bound	Upper Bound												Lower Bound	Upper Bound
	Endo	Day -4	7daysTHC	AcuteTHC	-0.0318889	0.358218	39	1	-0.928027	0.864249							Endo	7daysTHC	1.56667	0.0833025	231.449	1.40254	1.73079																										Endo
				Vehicle	0.02575	0.33382	39	1	-0.809353	0.860853								AcuteTHC	1.37037	0.0878085	231.449	1.19736	1.54338
			AcuteTHC	7daysTHC	0.0318889	0.358218	39	1	-0.864249	0.928027								Vehicle	1.51389	0.0760444	231.449	1.36406	1.66372
				Vehicle	0.0576389	0.343787	39	1	-0.802398	0.917676							Sham	7daysTHC	.a	.	.	.	.																										Sham
			Vehicle	7daysTHC	-0.02575	0.33382	39	1	-0.860853	0.809353								AcuteTHC	.a	.	.	.	.
				AcuteTHC	-0.0576389	0.343787	39	1	-0.917676	0.802398								Vehicle	1.47222	0.0760444	231.449	1.32239	1.62205
		Day 16	7daysTHC	AcuteTHC	0.616222	0.446476	39	0.526167	-0.500709	1.73315							a. This level combination of factors is not observed, thus the corresponding population marginal mean is not estimable. b. Dependent Variable: Daybasalpaw.																																a. This level combination of factors is not observed, thus the corresponding population marginal mean is not estimable. b. Dependent Variable: Day16paw.
				Vehicle	0.3365	0.416067	39	1	-0.704358	1.37736
			AcuteTHC	7daysTHC	-0.616222	0.446476	39	0.526167	-1.73315	0.500709							Pairwise Comparisonsd																																Pairwise Comparisonsd
				Vehicle	-0.279722	0.42849	39	1	-1.35166	0.792213							Surgery	(I) Treatment	(J) Treatment	Mean Difference (I-J)	Std. Error	df	Sig.a	95% Confidence Interval for Differencea																									Surgery
			Vehicle	7daysTHC	-0.3365	0.416067	39	1	-1.37736	0.704358														Lower Bound	Upper Bound
				AcuteTHC	0.279722	0.42849	39	1	-0.792213	1.35166							Endo	7daysTHC	AcuteTHC	0.196296	0.121036	231.449	0.318619	-0.095582	0.488175																								Endo
	Sham	Day -4	7daysTHC	AcuteTHC	.b,c	.	.	.	.	.									Vehicle	0.0527778	0.112792	231.449	1	-0.219221	0.324777
				Vehicle	.b	.	.	.	.	.								AcuteTHC	7daysTHC	-0.196296	0.121036	231.449	0.318619	-0.488175	0.095582
			AcuteTHC	7daysTHC	.b,c	.	.	.	.	.									Vehicle	-0.143519	0.11616	231.449	0.653661	-0.423639	0.136601
				Vehicle	.b	.	.	.	.	.								Vehicle	7daysTHC	-0.0527778	0.112792	231.449	1	-0.324777	0.219221
			Vehicle	7daysTHC	.c	.	.	.	.	.									AcuteTHC	0.143519	0.11616	231.449	0.653661	-0.136601	0.423639
				AcuteTHC	.c	.	.	.	.	.							Sham	7daysTHC	AcuteTHC	.b,c	.	.	.	.	.																								Sham
		Day 16	7daysTHC	AcuteTHC	.b,c	.	.	.	.	.									Vehicle	.b	.	.	.	.	.
				Vehicle	.b	.	.	.	.	.								AcuteTHC	7daysTHC	.b,c	.	.	.	.	.
			AcuteTHC	7daysTHC	.b,c	.	.	.	.	.									Vehicle	.b	.	.	.	.	.
				Vehicle	.b	.	.	.	.	.								Vehicle	7daysTHC	.c	.	.	.	.	.
			Vehicle	7daysTHC	.c	.	.	.	.	.									AcuteTHC	.c	.	.	.	.	.
				AcuteTHC	.c	.	.	.	.	.							Based on estimated marginal means																																Based on estimated marginal means
	Based on estimated marginal means																a. Adjustment for multiple comparisons: Bonferroni. b. The level combination of factors in (I) is not observed. c. The level combination of factors in (J) is not observed. d. Dependent Variable: Daybasalpaw.																																a. Adjustment for multiple comparisons: Bonferroni. b. The level combination of factors in (I) is not observed. c. The level combination of factors in (J) is not observed. d. Dependent Variable: Day16paw.
	a. Adjustment for multiple comparisons: Bonferroni. b. The level combination of factors in (I) is not observed. c. The level combination of factors in (J) is not observed. d. Dependent Variable: AUCPAW.
																	Univariate Testsa																																Univariate Testsa
	Univariate Testsa																Surgery	Numerator df	Denominator df	F	Sig.																												Surgery
	Surgery	Day	Numerator df	Denominator df	F	Sig.											Endo	2	231.449	1.40079	0.248484																												Endo
	Endo	Day -4	2	39	0.0140608	0.986043											Sham	0	.	.	.																												Sham
		Day 16	2	39	0.960211	0.391677											Each F tests the simple effects of Treatment within each level combination of the other effects shown. These tests are based on the estimable linearly independent pairwise comparisons among the estimated marginal means.																																Each F tests the simple effects of Treatment within each level combination of the other effects shown. These tests are based on the estimable linearly independent pairwise comparisons among the estimated marginal means.
	Sham	Day -4	0	.	.	.											a. Dependent Variable: Daybasalpaw.																																a. Dependent Variable: Day16paw.
		Day 16	0	.	.	.
	Each F tests the simple effects of Treatment within each level combination of the other effects shown. These tests are based on the estimable linearly independent pairwise comparisons among the estimated marginal means.
	a. Dependent Variable: AUCPAW.																7. Surgery * Filament																																7. Surgery * Filament
																	Estimatesb																																Estimatesb
	13. Surgery * Treatment * Day																Surgery	Filament	Mean	Std. Error	df	95% Confidence Interval																											Surgery
																						Lower Bound	Upper Bound
	Estimatesb																Endo	1.65	0.37963	0.110816	39	0.155483	0.603776																										Endo
	Surgery	Treatment	Day	Mean	Std. Error	df	95% Confidence Interval											2.36	0.514815	0.124707	39	0.262572	0.767058
							Lower Bound	Upper Bound										2.44	1.37593	0.118969	39	1.13529	1.61656
	Endo	7daysTHC	Day -4	2.682	0.246542	39	2.18332	3.18068										2.83	1.71111	0.117709	39	1.47302	1.9492
			Day 16	3.074	0.307286	39	2.45246	3.69554										3.22	1.9963	0.106243	39	1.7814	2.21119
		AcuteTHC	Day -4	2.71389	0.259878	39	2.18824	3.23954										3.61	2.92407	0.120835	39	2.67966	3.16849
			Day 16	2.45778	0.323908	39	1.80261	3.11294									Sham	1.65	.500a	0.176861	39	0.142266	0.857734																										Sham
		Vehicle	Day -4	2.65625	0.225061	39	2.20102	3.11148										2.36	.417a	0.19903	39	0.0140901	0.819243
			Day 16	2.7375	0.280513	39	2.17011	3.30489										2.44	1.333a	0.189873	39	0.949279	1.71739
	Sham	7daysTHC	Day -4	.a	.	.	.	.										2.83	1.750a	0.187862	39	1.37001	2.12999
			Day 16	.a	.	.	.	.										3.22	2.167a	0.169562	39	1.8237	2.50964
		AcuteTHC	Day -4	.a	.	.	.	.										3.61	2.667a	0.192851	39	2.27659	3.05674
			Day 16	.a	.	.	.	.									a. Based on modified population marginal mean. b. Dependent Variable: Daybasalpaw.																																a. Based on modified population marginal mean. b. Dependent Variable: Day16paw.
		Vehicle	Day -4	2.70292	0.225061	39	2.24769	3.15815
			Day 16	3.09208	0.280513	39	2.52469	3.65947									Pairwise Comparisonsd																																Pairwise Comparisonsd
	a. This level combination of factors is not observed, thus the corresponding population marginal mean is not estimable. b. Dependent Variable: AUCPAW.																Filament	(I) Surgery	(J) Surgery	Mean Difference (I-J)	Std. Error	df	Sig.b	95% Confidence Interval for Differenceb																									Filament
																								Lower Bound	Upper Bound
	Pairwise Comparisonsd																1.65	Endo	Sham	-.120a	0.20871	39	0.567433	-0.542526	0.301785																								1.65
	Surgery	Treatment	(I) Day	(J) Day	Mean Difference (I-J)	Std. Error	df	Sig.a	95% Confidence Interval for Differencea									Sham	Endo	.120c	0.20871	39	0.567433	-0.301785	0.542526
									Lower Bound	Upper Bound							2.36	Endo	Sham	.098a	0.234872	39	0.678327	-0.376925	0.573221																								2.36
	Endo	7daysTHC	Day -4	Day 16	-0.392	0.393964	74.4999	0.32295	-1.1769	0.392904								Sham	Endo	-.098c	0.234872	39	0.678327	-0.573221	0.376925
			Day 16	Day -4	0.392	0.393964	74.4999	0.32295	-0.392904	1.1769							2.44	Endo	Sham	.043a	0.224066	39	0.850225	-0.410623	0.495808																								2.44
		AcuteTHC	Day -4	Day 16	0.256111	0.415275	74.4999	0.539295	-0.57125	1.08347								Sham	Endo	-.043c	0.224066	39	0.850225	-0.495808	0.410623
			Day 16	Day -4	-0.256111	0.415275	74.4999	0.539295	-1.08347	0.57125							2.83	Endo	Sham	-.039a	0.221692	39	0.861658	-0.487304	0.409526																								2.83
		Vehicle	Day -4	Day 16	-0.08125	0.359639	74.4999	0.821881	-0.797766	0.635266								Sham	Endo	.039c	0.221692	39	0.861658	-0.409526	0.487304
			Day 16	Day -4	0.08125	0.359639	74.4999	0.821881	-0.635266	0.797766							3.22	Endo	Sham	-.170a	0.200097	39	0.399723	-0.575104	0.234363																								3.22
	Sham	7daysTHC	Day -4	Day 16	.b,c	.	.	.	.	.								Sham	Endo	.170c	0.200097	39	0.399723	-0.234363	0.575104
			Day 16	Day -4	.b,c	.	.	.	.	.							3.61	Endo	Sham	.257a	0.227579	39	0.264935	-0.202915	0.71773																								3.61
		AcuteTHC	Day -4	Day 16	.b,c	.	.	.	.	.								Sham	Endo	-.257c	0.227579	39	0.264935	-0.71773	0.202915
			Day 16	Day -4	.b,c	.	.	.	.	.							Based on estimated marginal means																																Based on estimated marginal means
		Vehicle	Day -4	Day 16	-0.389167	0.359639	74.4999	0.282696	-1.10568	0.327349							a. An estimate of the modified population marginal mean (J). b. Adjustment for multiple comparisons: Bonferroni. c. An estimate of the modified population marginal mean (I). d. Dependent Variable: Daybasalpaw.																																a. An estimate of the modified population marginal mean (J). b. Adjustment for multiple comparisons: Bonferroni. c. An estimate of the modified population marginal mean (I). d. Dependent Variable: Day16paw.
			Day 16	Day -4	0.389167	0.359639	74.4999	0.282696	-0.327349	1.10568
	Based on estimated marginal means																Univariate Testsa																																Univariate Testsa
	a. Adjustment for multiple comparisons: Bonferroni. b. The level combination of factors in (I) is not observed. c. The level combination of factors in (J) is not observed. d. Dependent Variable: AUCPAW.																Filament	Numerator df	Denominator df	F	Sig.																												Filament
																	1.65	1	39	0.332623	0.567433																												1.65
	Univariate Testsa																2.36	1	39	0.174623	0.678327																												2.36
	Surgery	Treatment	Numerator df	Denominator df	F	Sig.											2.44	1	39	0.0361341	0.850225																												2.44
	Endo	7daysTHC	1	74.4999	0.990053	0.32295											2.83	1	39	0.0307716	0.861658																												2.83
		AcuteTHC	1	74.4999	0.380352	0.539295											3.22	1	39	0.72495	0.399723																												3.22
		Vehicle	1	74.4999	0.0510404	0.821881											3.61	1	39	1.27931	0.264935																												3.61
	Sham	7daysTHC	0	.	.	.											Each F tests the simple effects of Surgery within each level combination of the other effects shown. These tests are based on the linearly independent pairwise comparisons among the estimated marginal means.																																Each F tests the simple effects of Surgery within each level combination of the other effects shown. These tests are based on the linearly independent pairwise comparisons among the estimated marginal means.
		AcuteTHC	0	.	.	.											a. Dependent Variable: Daybasalpaw.																																a. Dependent Variable: Day16paw.
		Vehicle	1	74.4999	1.17095	0.282696
	Each F tests the simple effects of Day within each level combination of the other effects shown. These tests are based on the estimable linearly independent pairwise comparisons among the estimated marginal means.
	a. Dependent Variable: AUCPAW.																8. Surgery * Filament																																8. Surgery * Filament
																	Estimatesb																																Estimatesb
																	Surgery	Filament	Mean	Std. Error	df	95% Confidence Interval																											Surgery
																						Lower Bound	Upper Bound
																	Endo	1.65	0.37963	0.110816	39	0.155483	0.603776																										Endo
																		2.36	0.514815	0.124707	39	0.262572	0.767058
																		2.44	1.37593	0.118969	39	1.13529	1.61656
																		2.83	1.71111	0.117709	39	1.47302	1.9492
																		3.22	1.9963	0.106243	39	1.7814	2.21119
																		3.61	2.92407	0.120835	39	2.67966	3.16849
																	Sham	1.65	.500a	0.176861	39	0.142266	0.857734																										Sham
																		2.36	.417a	0.19903	39	0.0140901	0.819243
																		2.44	1.333a	0.189873	39	0.949279	1.71739
																		2.83	1.750a	0.187862	39	1.37001	2.12999
																		3.22	2.167a	0.169562	39	1.8237	2.50964
																		3.61	2.667a	0.192851	39	2.27659	3.05674
																	a. Based on modified population marginal mean. b. Dependent Variable: Daybasalpaw.																																a. Based on modified population marginal mean. b. Dependent Variable: Day16paw.
																	Pairwise Comparisonsd																																Pairwise Comparisonsd
																	Surgery	(I) Filament	(J) Filament	Mean Difference (I-J)	Std. Error	df	Sig.a	95% Confidence Interval for Differencea																									Surgery
																								Lower Bound	Upper Bound
																	Endo	1.65	2.36	-0.135185	0.166829	76.9369	1	-0.640613	0.370242																								Endo
																			2.44	-.996*	0.162585	77.6101	5.17286e-07	-1.48873	-0.503864
																			2.83	-1.331*	0.161665	77.7177	5.0391e-11	-1.82111	-0.841857
																			3.22	-1.617*	0.153518	77.8619	1.86409e-15	-2.08159	-1.15174
																			3.61	-2.544*	0.163955	77.4229	2.66159e-24	-3.04106	-2.04782
																		2.36	1.65	0.135185	0.166829	76.9369	1	-0.370242	0.640613
																			2.44	-.861*	0.172353	77.8276	5.26491e-05	-1.38308	-0.339141
																			2.83	-1.196*	0.171485	77.7413	1.33016e-08	-1.71566	-0.676935
																			3.22	-1.481*	0.163827	76.0795	1.64263e-12	-1.97799	-0.98497
																			3.61	-2.409*	0.173646	77.9225	1.4071e-21	-2.93512	-1.88339
																		2.44	1.65	.996*	0.162585	77.6101	5.17286e-07	0.503864	1.48873
																			2.36	.861*	0.172353	77.8276	5.26491e-05	0.339141	1.38308
																			2.83	-0.335185	0.167359	77.9912	0.73012	-0.841998	0.171628
																			3.22	-.620*	0.159503	77.0224	0.00317665	-1.10358	-0.137156
																			3.61	-1.548*	0.169572	77.9811	9.08772e-13	-2.06167	-1.03463
																		2.83	1.65	1.331*	0.161665	77.7177	5.0391e-11	0.841857	1.82111
																			2.36	1.196*	0.171485	77.7413	1.33016e-08	0.676935	1.71566
																			2.44	0.335185	0.167359	77.9912	0.73012	-0.171628	0.841998
																			3.22	-0.285185	0.158565	77.1948	1	-0.765524	0.195154
																			3.61	-1.213*	0.16869	77.9465	5.13404e-09	-1.72382	-0.702109
																		3.22	1.65	1.617*	0.153518	77.8619	1.86409e-15	1.15174	2.08159
																			2.36	1.481*	0.163827	76.0795	1.64263e-12	0.98497	1.97799
																			2.44	.620*	0.159503	77.0224	0.00317665	0.137156	1.10358
																			2.83	0.285185	0.158565	77.1948	1	-0.195154	0.765524
																			3.61	-.928*	0.160899	76.7428	2.41892e-06	-1.41528	-0.440276
																		3.61	1.65	2.544*	0.163955	77.4229	2.66159e-24	2.04782	3.04106
																			2.36	2.409*	0.173646	77.9225	1.4071e-21	1.88339	2.93512
																			2.44	1.548*	0.169572	77.9811	9.08772e-13	1.03463	2.06167
																			2.83	1.213*	0.16869	77.9465	5.13404e-09	0.702109	1.72382
																			3.22	.928*	0.160899	76.7428	2.41892e-06	0.440276	1.41528
																	Sham	1.65	2.36	.083b,c	0.266257	76.9369	1	-0.723321	0.889988																								Sham
																			2.44	-.833*,b,c	0.259483	77.6101	0.0288357	-1.61925	-0.0474193
																			2.83	-1.250*,b,c	0.258015	77.7177	9.51681e-05	-2.03143	-0.468567
																			3.22	-1.667*,b,c	0.245012	77.8619	2.82102e-08	-2.40868	-0.924658
																			3.61	-2.167*,b,c	0.26167	77.4229	4.24446e-11	-2.95926	-1.37407
																		2.36	1.65	-.083b,c	0.266257	76.9369	1	-0.889988	0.723321
																			2.44	-.917*,b,c	0.275072	77.8276	0.0197892	-1.74972	-0.0836103
																			2.83	-1.333*,b,c	0.273688	77.7413	8.56735e-05	-2.16223	-0.504441
																			3.22	-1.750*,b,c	0.261465	76.0795	4.94008e-08	-2.54243	-0.957575
																			3.61	-2.250*,b,c	0.277136	77.9225	8.3616e-11	-3.08927	-1.41073
																		2.44	1.65	.833*,b,c	0.259483	77.6101	0.0288357	0.0474193	1.61925
																			2.36	.917*,b,c	0.275072	77.8276	0.0197892	0.0836103	1.74972
																			2.83	-.417b,c	0.267103	77.9912	1	-1.22553	0.3922
																			3.22	-.833*,b,c	0.254564	77.0224	0.0238771	-1.60454	-0.0621301
																			3.61	-1.333*,b,c	0.270635	77.9811	6.88962e-05	-2.1529	-0.513767
																		2.83	1.65	1.250*,b,c	0.258015	77.7177	9.51681e-05	0.468567	2.03143
																			2.36	1.333*,b,c	0.273688	77.7413	8.56735e-05	0.504441	2.16223
																			2.44	.417b,c	0.267103	77.9912	1	-0.3922	1.22553
																			3.22	-.417b,c	0.253068	77.1948	1	-1.18328	0.349948
																			3.61	-.917*,b,c	0.269227	77.9465	0.0157328	-1.73198	-0.101351
																		3.22	1.65	1.667*,b,c	0.245012	77.8619	2.82102e-08	0.924658	2.40868
																			2.36	1.750*,b,c	0.261465	76.0795	4.94008e-08	0.957575	2.54243
																			2.44	.833*,b,c	0.254564	77.0224	0.0238771	0.0621301	1.60454
																			2.83	.417b,c	0.253068	77.1948	1	-0.349948	1.18328
																			3.61	-.500b,c	0.256793	76.7428	0.827731	-1.27805	0.278046
																		3.61	1.65	2.167*,b,c	0.26167	77.4229	4.24446e-11	1.37407	2.95926
																			2.36	2.250*,b,c	0.277136	77.9225	8.3616e-11	1.41073	3.08927
																			2.44	1.333*,b,c	0.270635	77.9811	6.88962e-05	0.513767	2.1529
																			2.83	.917*,b,c	0.269227	77.9465	0.0157328	0.101351	1.73198
																			3.22	.500b,c	0.256793	76.7428	0.827731	-0.278046	1.27805
																	Based on estimated marginal means																																Based on estimated marginal means
																	a. Adjustment for multiple comparisons: Bonferroni. *. The mean difference is significant at the .05 level. b. An estimate of the modified population marginal mean (I). c. An estimate of the modified population marginal mean (J). d. Dependent Variable: Daybasalpaw.																																a. Adjustment for multiple comparisons: Bonferroni. *. The mean difference is significant at the .05 level. b. An estimate of the modified population marginal mean (I). c. An estimate of the modified population marginal mean (J). d. Dependent Variable: Day16paw.
																	Univariate Testsa																																Univariate Testsa
																	Surgery	Numerator df	Denominator df	F	Sig.																												Surgery
																	Endo	5	68.7346	65.9094	7.26941e-25																												Endo
																	Sham	5	68.7346	23.2327	1.3877e-13																												Sham
																	Each F tests the simple effects of Filament within each level combination of the other effects shown. These tests are based on the linearly independent pairwise comparisons among the estimated marginal means.																																Each F tests the simple effects of Filament within each level combination of the other effects shown. These tests are based on the linearly independent pairwise comparisons among the estimated marginal means.
																	a. Dependent Variable: Daybasalpaw.																																a. Dependent Variable: Day16paw.
																	9. Treatment * Filament																																9. Treatment * Filament
																	Estimatesb																																Estimatesb
																	Treatment	Filament	Mean	Std. Error	df	95% Confidence Interval																											Treatment
																						Lower Bound	Upper Bound
																	7daysTHC	1.65	.500a	0.193741	39	0.108122	0.891878																										7daysTHC
																		2.36	.600a	0.218027	39	0.159	1.041
																		2.44	1.600a	0.207995	39	1.17929	2.02071
																		2.83	1.800a	0.205792	39	1.38375	2.21625
																		3.22	2.100a	0.185746	39	1.72429	2.47571
																		3.61	2.800a	0.211257	39	2.37269	3.22731
																	AcuteTHC	1.65	.556a	0.204221	39	0.142479	0.968632																										AcuteTHC
																		2.36	.444a	0.22982	39	-0.0204109	0.9093
																		2.44	1.111a	0.219246	39	0.667643	1.55458
																		2.83	1.667a	0.216924	39	1.2279	2.10544
																		3.22	1.889a	0.195793	39	1.49286	2.28492
																		3.61	2.556a	0.222685	39	2.10513	3.00598
																	Vehicle	1.65	0.291667	0.125059	39	0.0387103	0.544623																										Vehicle
																		2.36	0.458333	0.140736	39	0.173669	0.742998
																		2.44	1.375	0.13426	39	1.10343	1.64657
																		2.83	1.70833	0.132838	39	1.43964	1.97702
																		3.22	2.08333	0.119898	39	1.84082	2.32585
																		3.61	3.04167	0.136366	39	2.76584	3.31749
																	a. Based on modified population marginal mean. b. Dependent Variable: Daybasalpaw.																																a. Based on modified population marginal mean. b. Dependent Variable: Day16paw.
																	Pairwise Comparisonsd																																Pairwise Comparisonsd
																	Filament	(I) Treatment	(J) Treatment	Mean Difference (I-J)	Std. Error	df	Sig.c	95% Confidence Interval for Differencec																									Filament
																								Lower Bound	Upper Bound
																	1.65	7daysTHC	AcuteTHC	-.056a,b	0.281499	39	1	-0.75977	0.648659																								1.65
																			Vehicle	.208a	0.230598	39	1	-0.368544	0.785211
																		AcuteTHC	7daysTHC	.056a,b	0.281499	39	1	-0.648659	0.75977
																			Vehicle	.264a	0.23947	39	0.831689	-0.335184	0.862962
																		Vehicle	7daysTHC	-.208b	0.230598	39	1	-0.785211	0.368544
																			AcuteTHC	-.264b	0.23947	39	0.831689	-0.862962	0.335184
																	2.36	7daysTHC	AcuteTHC	.156a,b	0.316785	39	1	-0.636933	0.948044																								2.36
																			Vehicle	.142a	0.259504	39	1	-0.507523	0.790856
																		AcuteTHC	7daysTHC	-.156a,b	0.316785	39	1	-0.948044	0.636933
																			Vehicle	-.014a	0.269488	39	1	-0.688056	0.660278
																		Vehicle	7daysTHC	-.142b	0.259504	39	1	-0.790856	0.507523
																			AcuteTHC	.014b	0.269488	39	1	-0.660278	0.688056
																	2.44	7daysTHC	AcuteTHC	.489a,b	0.30221	39	0.341357	-0.267138	1.24492																								2.44
																			Vehicle	.225a	0.247564	39	1	-0.394321	0.844321
																		AcuteTHC	7daysTHC	-.489a,b	0.30221	39	0.341357	-1.24492	0.267138
																			Vehicle	-.264a	0.257089	39	0.933014	-0.907038	0.37926
																		Vehicle	7daysTHC	-.225b	0.247564	39	1	-0.844321	0.394321
																			AcuteTHC	.264b	0.257089	39	0.933014	-0.37926	0.907038
																	2.83	7daysTHC	AcuteTHC	.133a,b	0.299009	39	1	-0.614685	0.881352																								2.83
																			Vehicle	.092a	0.244942	39	1	-0.521094	0.704427
																		AcuteTHC	7daysTHC	-.133a,b	0.299009	39	1	-0.881352	0.614685
																			Vehicle	-.042a	0.254366	39	1	-0.678003	0.59467
																		Vehicle	7daysTHC	-.092b	0.244942	39	1	-0.704427	0.521094
																			AcuteTHC	.042b	0.254366	39	1	-0.59467	0.678003
																	3.22	7daysTHC	AcuteTHC	.211a,b	0.269882	39	1	-0.464042	0.886264																								3.22
																			Vehicle	.017a	0.221081	39	1	-0.536404	0.569737
																		AcuteTHC	7daysTHC	-.211a,b	0.269882	39	1	-0.886264	0.464042
																			Vehicle	-.194a	0.229588	39	1	-0.768794	0.379905
																		Vehicle	7daysTHC	-.017b	0.221081	39	1	-0.569737	0.536404
																			AcuteTHC	.194b	0.229588	39	1	-0.379905	0.768794
																	3.61	7daysTHC	AcuteTHC	.244a,b	0.30695	39	1	-0.523439	1.01233																								3.61
																			Vehicle	-.242a	0.251446	39	1	-0.8707	0.387366
																		AcuteTHC	7daysTHC	-.244a,b	0.30695	39	1	-1.01233	0.523439
																			Vehicle	-.486a	0.261121	39	0.210611	-1.13935	0.167124
																		Vehicle	7daysTHC	.242b	0.251446	39	1	-0.387366	0.8707
																			AcuteTHC	.486b	0.261121	39	0.210611	-0.167124	1.13935
																	Based on estimated marginal means																																Based on estimated marginal means
																	a. An estimate of the modified population marginal mean (I). b. An estimate of the modified population marginal mean (J). c. Adjustment for multiple comparisons: Bonferroni. d. Dependent Variable: Daybasalpaw.																																a. An estimate of the modified population marginal mean (I). b. An estimate of the modified population marginal mean (J). c. Adjustment for multiple comparisons: Bonferroni. d. Dependent Variable: Day16paw.
																	Univariate Testsa																																Univariate Testsa
																	Filament	Numerator df	Denominator df	F	Sig.																												Filament
																	1.65	2	39	0.797262	0.457767																												1.65
																	2.36	2	39	0.172114	0.84252																												2.36
																	2.44	2	39	1.30902	0.281687																												2.44
																	2.83	2	39	0.109597	0.89647																												2.83
																	3.22	2	39	0.412671	0.664736																												3.22
																	3.61	2	39	1.83516	0.173103																												3.61
																	Each F tests the simple effects of Treatment within each level combination of the other effects shown. These tests are based on the linearly independent pairwise comparisons among the estimated marginal means.																																Each F tests the simple effects of Treatment within each level combination of the other effects shown. These tests are based on the linearly independent pairwise comparisons among the estimated marginal means.
																	a. Dependent Variable: Daybasalpaw.																																a. Dependent Variable: Day16paw.
																	10. Treatment * Filament																																10. Treatment * Filament
																	Estimatesb																																Estimatesb
																	Treatment	Filament	Mean	Std. Error	df	95% Confidence Interval																											Treatment
																						Lower Bound	Upper Bound
																	7daysTHC	1.65	.500a	0.193741	39	0.108122	0.891878																										7daysTHC
																		2.36	.600a	0.218027	39	0.159	1.041
																		2.44	1.600a	0.207995	39	1.17929	2.02071
																		2.83	1.800a	0.205792	39	1.38375	2.21625
																		3.22	2.100a	0.185746	39	1.72429	2.47571
																		3.61	2.800a	0.211257	39	2.37269	3.22731
																	AcuteTHC	1.65	.556a	0.204221	39	0.142479	0.968632																										AcuteTHC
																		2.36	.444a	0.22982	39	-0.0204109	0.9093
																		2.44	1.111a	0.219246	39	0.667643	1.55458
																		2.83	1.667a	0.216924	39	1.2279	2.10544
																		3.22	1.889a	0.195793	39	1.49286	2.28492
																		3.61	2.556a	0.222685	39	2.10513	3.00598
																	Vehicle	1.65	0.291667	0.125059	39	0.0387103	0.544623																										Vehicle
																		2.36	0.458333	0.140736	39	0.173669	0.742998
																		2.44	1.375	0.13426	39	1.10343	1.64657
																		2.83	1.70833	0.132838	39	1.43964	1.97702
																		3.22	2.08333	0.119898	39	1.84082	2.32585
																		3.61	3.04167	0.136366	39	2.76584	3.31749
																	a. Based on modified population marginal mean. b. Dependent Variable: Daybasalpaw.																																a. Based on modified population marginal mean. b. Dependent Variable: Day16paw.
																	Pairwise Comparisonsd																																Pairwise Comparisonsd
																	Treatment	(I) Filament	(J) Filament	Mean Difference (I-J)	Std. Error	df	Sig.c	95% Confidence Interval for Differencec																									Treatment
																								Lower Bound	Upper Bound
																	7daysTHC	1.65	2.36	-.100a,b	0.29167	76.9369	1	-0.983646	0.783646																								7daysTHC
																			2.44	-1.100a,b,*	0.284249	77.6101	0.00338065	-1.96093	-0.239074
																			2.83	-1.300a,b,*	0.282641	77.7177	0.00024271	-2.15602	-0.443983
																			3.22	-1.600a,b,*	0.268397	77.8619	1.03489e-06	-2.41283	-0.787171
																			3.61	-2.300a,b,*	0.286645	77.4229	1.32752e-10	-3.16825	-1.43175
																		2.36	1.65	.100a,b	0.29167	76.9369	1	-0.783646	0.983646
																			2.44	-1.000a,b,*	0.301327	77.8276	0.0206645	-1.91257	-0.0874324
																			2.83	-1.200a,b,*	0.29981	77.7413	0.00213121	-2.10801	-0.291993
																			3.22	-1.500a,b,*	0.286421	76.0795	2.10975e-05	-2.36806	-0.631942
																			3.61	-2.200a,b,*	0.303587	77.9225	4.01371e-09	-3.11938	-1.28062
																		2.44	1.65	1.100a,b,*	0.284249	77.6101	0.00338065	0.239074	1.96093
																			2.36	1.000a,b,*	0.301327	77.8276	0.0206645	0.0874324	1.91257
																			2.83	-.200a,b	0.292596	77.9912	1	-1.08607	0.686069
																			3.22	-.500a,b	0.278861	77.0224	1	-1.34481	0.344811
																			3.61	-1.200a,b,*	0.296465	77.9811	0.00181439	-2.09779	-0.302211
																		2.83	1.65	1.300a,b,*	0.282641	77.7177	0.00024271	0.443983	2.15602
																			2.36	1.200a,b,*	0.29981	77.7413	0.00213121	0.291993	2.10801
																			2.44	.200a,b	0.292596	77.9912	1	-0.686069	1.08607
																			3.22	-.300a,b	0.277222	77.1948	1	-1.13978	0.539784
																			3.61	-1.000a,b,*	0.294924	77.9465	0.0164541	-1.89313	-0.106866
																		3.22	1.65	1.600a,b,*	0.268397	77.8619	1.03489e-06	0.787171	2.41283
																			2.36	1.500a,b,*	0.286421	76.0795	2.10975e-05	0.631942	2.36806
																			2.44	.500a,b	0.278861	77.0224	1	-0.344811	1.34481
																			2.83	.300a,b	0.277222	77.1948	1	-0.539784	1.13978
																			3.61	-.700a,b	0.281302	76.7428	0.224972	-1.55231	0.152306
																		3.61	1.65	2.300a,b,*	0.286645	77.4229	1.32752e-10	1.43175	3.16825
																			2.36	2.200a,b,*	0.303587	77.9225	4.01371e-09	1.28062	3.11938
																			2.44	1.200a,b,*	0.296465	77.9811	0.00181439	0.302211	2.09779
																			2.83	1.000a,b,*	0.294924	77.9465	0.0164541	0.106866	1.89313
																			3.22	.700a,b	0.281302	76.7428	0.224972	-0.152306	1.55231
																	AcuteTHC	1.65	2.36	.111a,b	0.307447	76.9369	1	-0.820334	1.04256																								AcuteTHC
																			2.44	-.556a,b	0.299625	77.6101	1	-1.46305	0.35194
																			2.83	-1.111a,b,*	0.29793	77.7177	0.00544322	-2.01343	-0.20879
																			3.22	-1.333a,b,*	0.282915	77.8619	0.000157537	-2.19013	-0.476536
																			3.61	-2.000a,b,*	0.30215	77.4229	6.37303e-08	-2.91521	-1.08479
																		2.36	1.65	-.111a,b	0.307447	76.9369	1	-1.04256	0.820334
																			2.44	-.667a,b	0.317626	77.8276	0.586018	-1.6286	0.295264
																			2.83	-1.222a,b,*	0.316027	77.7413	0.00340474	-2.17935	-0.265099
																			3.22	-1.444a,b,*	0.301914	76.0795	0.00012351	-2.35946	-0.529431
																			3.61	-2.111a,b,*	0.320009	77.9225	6.85705e-08	-3.08022	-1.142
																		2.44	1.65	.556a,b	0.299625	77.6101	1	-0.35194	1.46305
																			2.36	.667a,b	0.317626	77.8276	0.586018	-0.295264	1.6286
																			2.83	-.556a,b	0.308423	77.9912	1	-1.48955	0.378443
																			3.22	-.778a,b	0.293945	77.0224	0.14806	-1.66829	0.112731
																			3.61	-1.444a,b,*	0.312502	77.9811	0.000221889	-2.3908	-0.498091
																		2.83	1.65	1.111a,b,*	0.29793	77.7177	0.00544322	0.20879	2.01343
																			2.36	1.222a,b,*	0.316027	77.7413	0.00340474	0.265099	2.17935
																			2.44	.556a,b	0.308423	77.9912	1	-0.378443	1.48955
																			3.22	-.222a,b	0.292217	77.1948	1	-1.10743	0.662988
																			3.61	-.889a,b	0.310877	77.9465	0.0816776	-1.83033	0.0525565
																		3.22	1.65	1.333a,b,*	0.282915	77.8619	0.000157537	0.476536	2.19013
																			2.36	1.444a,b,*	0.301914	76.0795	0.00012351	0.529431	2.35946
																			2.44	.778a,b	0.293945	77.0224	0.14806	-0.112731	1.66829
																			2.83	.222a,b	0.292217	77.1948	1	-0.662988	1.10743
																			3.61	-.667a,b	0.296519	76.7428	0.411394	-1.56508	0.231743
																		3.61	1.65	2.000a,b,*	0.30215	77.4229	6.37303e-08	1.08479	2.91521
																			2.36	2.111a,b,*	0.320009	77.9225	6.85705e-08	1.142	3.08022
																			2.44	1.444a,b,*	0.312502	77.9811	0.000221889	0.498091	2.3908
																			2.83	.889a,b	0.310877	77.9465	0.0816776	-0.0525565	1.83033
																			3.22	.667a,b	0.296519	76.7428	0.411394	-0.231743	1.56508
																	Vehicle	1.65	2.36	-0.166667	0.188272	76.9369	1	-0.737058	0.403724																								Vehicle
																			2.44	-1.083*	0.183482	77.6101	1.32519e-06	-1.63906	-0.527608
																			2.83	-1.417*	0.182444	77.7177	4.10357e-10	-1.96922	-0.86411
																			3.22	-1.792*	0.17325	77.8619	4.27814e-15	-2.31635	-1.26699
																			3.61	-2.750*	0.185028	77.4229	3.29552e-23	-3.31045	-2.18955
																		2.36	1.65	0.166667	0.188272	76.9369	1	-0.403724	0.737058
																			2.44	-.917*	0.194505	77.8276	0.000157639	-1.50573	-0.327607
																			2.83	-1.250*	0.193527	77.7413	1.25282e-07	-1.83612	-0.663884
																			3.22	-1.625*	0.184884	76.0795	5.03066e-12	-2.18533	-1.06467
																			3.61	-2.583*	0.195965	77.9225	2.33708e-20	-3.17679	-1.98988
																		2.44	1.65	1.083*	0.183482	77.6101	1.32519e-06	0.527608	1.63906
																			2.36	.917*	0.194505	77.8276	0.000157639	0.327607	1.50573
																			2.83	-0.333333	0.18887	77.9912	1	-0.905288	0.238622
																			3.22	-.708*	0.180004	77.0224	0.00271315	-1.25366	-0.16301
																			3.61	-1.667*	0.191368	77.9811	5.94733e-12	-2.24619	-1.08715
																		2.83	1.65	1.417*	0.182444	77.7177	4.10357e-10	0.86411	1.96922
																			2.36	1.250*	0.193527	77.7413	1.25282e-07	0.663884	1.83612
																			2.44	0.333333	0.18887	77.9912	1	-0.238622	0.905288
																			3.22	-0.375	0.178946	77.1948	0.590927	-0.917078	0.167078
																			3.61	-1.333*	0.190373	77.9465	1.16538e-08	-1.90985	-0.756818
																		3.22	1.65	1.792*	0.17325	77.8619	4.27814e-15	1.26699	2.31635
																			2.36	1.625*	0.184884	76.0795	5.03066e-12	1.06467	2.18533
																			2.44	.708*	0.180004	77.0224	0.00271315	0.16301	1.25366
																			2.83	0.375	0.178946	77.1948	0.590927	-0.167078	0.917078
																			3.61	-.958*	0.18158	76.7428	1.7661e-05	-1.50849	-0.408172
																		3.61	1.65	2.750*	0.185028	77.4229	3.29552e-23	2.18955	3.31045
																			2.36	2.583*	0.195965	77.9225	2.33708e-20	1.98988	3.17679
																			2.44	1.667*	0.191368	77.9811	5.94733e-12	1.08715	2.24619
																			2.83	1.333*	0.190373	77.9465	1.16538e-08	0.756818	1.90985
																			3.22	.958*	0.18158	76.7428	1.7661e-05	0.408172	1.50849
																	Based on estimated marginal means																																Based on estimated marginal means
																	a. An estimate of the modified population marginal mean (I). b. An estimate of the modified population marginal mean (J). c. Adjustment for multiple comparisons: Bonferroni. *. The mean difference is significant at the .05 level. d. Dependent Variable: Daybasalpaw.																																a. An estimate of the modified population marginal mean (I). b. An estimate of the modified population marginal mean (J). c. Adjustment for multiple comparisons: Bonferroni. *. The mean difference is significant at the .05 level. d. Dependent Variable: Day16paw.
																	Univariate Testsa																																Univariate Testsa
																	Treatment	Numerator df	Denominator df	F	Sig.																												Treatment
																	7daysTHC	5	68.7346	18.7212	1.0739e-11																												7daysTHC
																	AcuteTHC	5	68.7346	14.1486	1.6493e-09																												AcuteTHC
																	Vehicle	5	68.7346	60.5882	7.65524e-24																												Vehicle
																	Each F tests the simple effects of Filament within each level combination of the other effects shown. These tests are based on the linearly independent pairwise comparisons among the estimated marginal means.																																Each F tests the simple effects of Filament within each level combination of the other effects shown. These tests are based on the linearly independent pairwise comparisons among the estimated marginal means.
																	a. Dependent Variable: Daybasalpaw.																																a. Dependent Variable: Day16paw.
																	11. Surgery * Treatment * Filament																																11. Surgery * Treatment * Filament
																	Estimatesb																																Estimatesb
																	Surgery	Treatment	Filament	Mean	Std. Error	df	95% Confidence Interval																										Surgery
																							Lower Bound	Upper Bound
																	Endo	7daysTHC	1.65	0.5	0.193741	39	0.108122	0.891878																									Endo
																			2.36	0.6	0.218027	39	0.159	1.041
																			2.44	1.6	0.207995	39	1.17929	2.02071
																			2.83	1.8	0.205792	39	1.38375	2.21625
																			3.22	2.1	0.185746	39	1.72429	2.47571
																			3.61	2.8	0.211257	39	2.37269	3.22731
																		AcuteTHC	1.65	0.555556	0.204221	39	0.142479	0.968632
																			2.36	0.444444	0.22982	39	-0.0204109	0.9093
																			2.44	1.11111	0.219246	39	0.667643	1.55458
																			2.83	1.66667	0.216924	39	1.2279	2.10544
																			3.22	1.88889	0.195793	39	1.49286	2.28492
																			3.61	2.55556	0.222685	39	2.10513	3.00598
																		Vehicle	1.65	0.0833333	0.176861	39	-0.274401	0.441068
																			2.36	0.5	0.19903	39	0.0974235	0.902577
																			2.44	1.41667	0.189873	39	1.03261	1.80072
																			2.83	1.66667	0.187862	39	1.28668	2.04665
																			3.22	2	0.169562	39	1.65703	2.34297
																			3.61	3.41667	0.192851	39	3.02659	3.80674
																	Sham	7daysTHC	1.65	.a	.	.	.	.																									Sham
																			2.36	.a	.	.	.	.
																			2.44	.a	.	.	.	.
																			2.83	.a	.	.	.	.
																			3.22	.a	.	.	.	.
																			3.61	.a	.	.	.	.
																		AcuteTHC	1.65	.a	.	.	.	.
																			2.36	.a	.	.	.	.
																			2.44	.a	.	.	.	.
																			2.83	.a	.	.	.	.
																			3.22	.a	.	.	.	.
[truncated: 441 more rows]
[truncated: 28 more columns]

## Sheet: THC test report
Cannabinoids Test Report						Terpenes Test Report
[truncated: 24 more rows]
