# Supplementary material for: Disease-modifying effects of natural Δ9-tetrahydrocannabinol in endometriosis-associated pain
Source: eLife. 2020 Jan 14;9:e50356. doi: 10.7554/eLife.50356 (PMC6977967; doi:10.7554/eLife.50356)
Supplement: Figure 4—source data 1. [file elife-50356-fig4-data1.xlsx]

## Sheet: Figure 4
Figure 4a: Ectopic endometrium																	Figure 4b: Uterine innervation													Figure 4c: Estradiol levels in phases of the estrous cycle											Figure 4c: Estradiol levels in each group
Raw data		Cyst diameter (mm)						Cyst endometrial area (mm2)
		Vehicle		THC				Vehicle		THC
		Cyst diameter (mm)	Average mouse (mm)	Cyst diameter (mm)	Average mouse (mm)			Cyst endometrial area (mm2)	Average mouse (mm2)	Cyst endometrial area (mm2)	Average mouse (mm2)					Raw data		% of immunoreactive area											Raw data		Levels of 17-β estradiol in plasma (pg/ml)									Raw data		Levels of 17-β estradiol in plasma (pg/ml)
		2.067	3.38175	2.267	2.707			2.697	3.021	0.898	1.34533							Sham-vehicle	Sham-THC	Endo-Vehicle	Endo-THC										Proestrus	Estrus	Diestrus									Sham - vehicle	Endo - vehicle	Sham - THC	Endo - THC
		2.08		2.9				1.99		2.24								0.17	0.19	0.24	0.21										28.9466	24.2136	19.8267									13.4	19.83	19.07	16.08
		4.41		2.954				4.017		0.898								0.15	0.28	0.23	0.19										28.7102	24.1248	18.5115									19.41	18.51	22.48	14.18
		4.97						3.38										0.14	0.44	0.2	0.14										33.1577	13.855	24.1692									16.72	24.17	20.13	13.86
																		0.22	0.2	0.17	0.26										32.4509	18.4719	18.909									18.15	18.91	33.16	23.06
		2.285	2.634	0.675	1.2295			0.713	1.17733	0.133	0.9915							0.06	0.25	0.24	0.06											29.3187	22.71									19.97	22.71	21.94	15.28
		2.71		1.27				2.03		2.701								0.21	0.42	0.25	0.03											13.3985	32.1024									25.15	28.95	22.48	18.47
		2.907		1.428				0.789		0.618								0.09	0.22	0.29	0.19											18.1484	31.9691									22.35	24.21	27.76	28.71
				1.545						0.514								0.13	0.16	0.32	0.09											19.9731	16.0809									28.53	24.12	33.16	18.43
																		0.17		0.2	0.15											28.5337	14.1797									22.48	32.1		29.32
		1.521	2.79667	1.746	2.15			0.385	1.29267	0.77	0.820667							0.21		0.12	0.12											22.4782	23.0554									28.94	31.97		24.4
		3.04		1.54				2.31		0.92							Mean	0.155	0.27	0.226	0.144											22.4782	15.2769								Mean	21.51	24.548	25.0225	20.179
		3.829		3.164				1.183		0.772							SD	0.0525463	0.105424	0.0573876	0.0712117											22.4782	18.4323								SD	5.01297	5.00909	5.62813	5.82287
																	SEM	0.0166166	0.0372731	0.0181475	0.0225191											33.1577	24.4049								SEM	1.58524	1.58401	1.98984	1.84135
																	CI	0.0499074	0.0591514	0.111225	0.00157653											11.6354	19.4141								CI	11.4841	14.5298	13.7662	8.53326
		0.859	1.48275	0.659	1.761			0.25	0.91175	0.015	0.7258							0.260093	0.480849	0.340775	0.286423											18.893	16.7205									31.5359	34.5662	36.2788	31.8247
		1.33		1.25				2.48		0.552																						19.624	25.1466
		1.548		2.02				0.329		1.01																						19.3416	22.3498
		2.194		2.331				0.588		1.225																						16.4303	28.9367
				2.545						0.827																						30.7175	19.0688
		1.617	2.3375	1.271	1.79733			0.928	1.878	0.374	1.361					Statistics																	20.1322
		2.123		1.87				0.592		2.64																							21.9415
		2.79		2.251				2.5		1.069																							27.7582
		2.82						3.492											Value Label	N													23.9567
																	Surgery	0	Sham	18													34.5495
		2.352	2.698	0.911	1.49975			2.257	3.00167	0.252	0.65							1	Endo	20													24.1914
		2.46		1.25				5.2		0.76							Treatment	2	Vehicle	20													26.0665
		3.282		1.521				1.548		0.406								3	THC	18													20.8108
				2.317						1.182																							24.7046
																	Descriptive Statistics																22.9948
		1.29	2.198	0.94	1.353			0.27	1.07133	0.326	0.55675						Dependent Variable:% of immunoreactive area													Mean	30.8164	21.4354	22.7024
		2.38		1.109				1.77		0.252							Surgery	Treatment	Mean	Std. Deviation	N									SD	2.31557	5.93163	5.03604
		2.924		1.33				1.174		0.75							Sham	Vehicle	0.155	0.0525463	10									SEM	1.15779	1.36081	0.935169
				2.033						0.899								THC	0.27	0.105424	8									CI	26.1852	9.57211	12.6304
																		Total	0.206111	0.0974461	18										35.4475	33.2986	32.7745
		1.39	2.723	0.642	1.92875			1.039	1.59375	0.179	1.08175						Endo	Vehicle	0.226	0.0573876	10
		2.68		1.21				2.35		0.51								THC	0.144	0.0712117	10
		2.744		2.604				1.17		2.315								Total	0.185	0.0757072	20																				Between-Subjects Factors
		4.078		3.259				1.816		1.323							Total	Vehicle	0.1905	0.0647648	20																						N
																		THC	0.2	0.106826	18									Descriptive Statistics											Surgery	Endo	20
		2.011	2.90767	2.054	3.4086			0.705	2.08	0.682	1.1014							Total	0.195	0.086141	38									Estrogen levels												Sham	18
		2.06		1.727				1.38		0.621																				Phase	Count	Mean	Standard Deviation	Coefficient of Variation							Treatment	THC	18
		4.652		3.03				4.155		1.99							Tests of Between-Subjects Effects													Proestrus	4	30.8164	2.31557	0.075141								Veh	20
				3.873						0.943							Dependent Variable:% of immunoreactive area													Estrus	19	21.4354	5.93163	0.276722
				6.359						1.271							Source	Type III Sum of Squares	df	Mean Square	F	Sig.	Partial Eta Squared	Noncent. Parameter	Observed Powerb					Diestrus	29	22.7024	5.03604	0.221828							Tests of Between-Subjects Effects
		1.494	2.94475	1.507	1.9235			0.266	1.18025	0.416	1.2305						Corrected Model	.097a	3	0.0322067	6.15426	0.00185664	0.351921	18.4628	0.940414					Total	52	22.8636	5.69145	0.248931							Dependent Variable:17-b estradiol
		2.778		1.711				0.934		0.592							Intercept	1.48712	1	1.48712	284.168	4.42689e-18	0.893138	284.168	1																Source	Type III Sum of Squares	df	Mean Square	F	Sig.
		2.93		2.05				2.21		2.94							Surgery	0.00711765	1	0.00711765	1.36009	0.251638	0.0384639	1.36009	0.205249					Model Dimensiona											Corrected Model	155.014a	3	51.6713	1.79479	0.166743
		4.577		2.426				1.311		0.974							Treatment	0.00256235	1	0.00256235	0.489631	0.488852	0.0141965	0.489631	0.104449							Number of Levels	Number of Parameters								Intercept	19595.5	1	19595.5	680.644	4.55627e-24
																	Surgery * Treatment	0.0913153	1	0.0913153	17.4491	0.000194295	0.339153	17.4491	0.981986					Fixed Effects	Intercept	1	1								Surgery	7.66284	1	7.66284	0.266166	0.609254
	Mean	2.6052	2.61041	1.98844	1.97584		Mean	1.72023	1.72078	0.968179	0.98647						Error	0.17793	34	0.00523324											Phase	3	2								Treatment	1.73255	1	1.73255	0.0601797	0.807687
	SD	1.02795	0.512823	1.05931	0.65594		SD	1.22805	0.770875	0.7328	0.287562						Total	1.7195	38											Residual			1								Surgery * Treatment	146.151	1	146.151	5.0765	0.0308156
	SEM	0.173755	0.162169	0.169625	0.207427		SEM	0.207579	0.243772	0.117342	0.0909352						Corrected Total	0.27455	37											Total		4	4								Error	978.849	34	28.7897
	CI	0.549298	1.58476	-0.130177	0.663963		CI	-0.735877	0.179025	-0.49742	0.411345						a. R Squared = .352 (Adjusted R Squared = .295) b. Computed using alpha = .05													a. Dependent Variable: Estrogen levels											Total	20712.2	38
		4.6611	3.63605	4.10705	3.28772			4.17633	3.26253	2.43378	1.56159																														Corrected Total	1133.86	37
																														Information Criteriaa											a. R Squared = .137 (Adjusted R Squared = .061)
																	Estimated Marginal Means													-2 Restricted Log Likelihood	309.585
																														Akaike's Information Criterion (AIC)	311.585
																	1. Grand Mean													Hurvich and Tsai's Criterion (AICC)	311.67										Estimated Marginal Means
Statistics																	Dependent Variable:% of immunoreactive area													Bozdogan's Criterion (CAIC)	314.476
	Group Statistics						Tests of Normality										Mean	Std. Error	95% Confidence Interval											Schwarz's Bayesian Criterion (BIC)	313.476										1. Grand Mean
		Treatment	N	Mean	Std. Deviation	Std. Error Mean		Kolmogorov-Smirnova			Shapiro-Wilk								Lower Bound	Upper Bound										The information criteria are displayed in smaller-is-better forms.											Dependent Variable:17-b estradiol
	Diameter	Veh	10	2.6833	0.511499	0.16175		Statistic	df	Sig.	Statistic	df	Sig.				0.19875	0.0117902	0.17479	0.22271										a. Dependent Variable: Estrogen levels											Mean	Std. Error	95% Confidence Interval
		THC	10	1.9759	0.655967	0.207435	Endoarea	0.233047	20	0.00571942	0.869663	20	0.0115899																														Lower Bound	Upper Bound
							a. Lilliefors Significance Correction										2. Surgery																								22.8146	0.874486	21.0374	24.5918
	Independent Samples Test																Dependent Variable:% of immunoreactive area													Fixed Effects
			Levene's Test for Equality of Variances		t-test for Equality of Means		Mann-Whitney Test										Surgery	Mean	Std. Error	95% Confidence Interval
			F	Sig.	t	df														Lower Bound	Upper Bound									Type III Tests of Fixed Effectsa											2. Surgery
							Ranks										Sham	0.2125	0.0171572	0.177632	0.247368									Source	Numerator df	Denominator df	F	Sig.
	Diameter	Equal variances assumed	0.472615	0.500549	2.68928	18		Nonparametric	N	Mean Rank	Sum of Ranks						Endo	0.185	0.016176	0.152126	0.217874									Intercept	1	49	600.651	3.7162e-29							Estimates
		Equal variances not assumed			2.68928	16.9905	Endoarea	Vehicle	10	14.1	141																			Phase	2	49	5.27107	0.00844508							Dependent Variable:17-b estradiol
								THC	10	6.9	69						3. Treatment													a. Dependent Variable: Estrogen levels											Surgery	Mean	Std. Error	95% Confidence Interval
								Total	20								Dependent Variable:% of immunoreactive area																											Lower Bound	Upper Bound
																	Treatment	Mean	Std. Error	95% Confidence Interval																					Endo	22.3634	1.19979	19.9252	24.8017
							Test Statisticsb													Lower Bound	Upper Bound									Covariance Parameters											Sham	23.2658	1.27256	20.6796	25.8519
								Endoarea									Vehicle	0.1905	0.016176	0.157626	0.223374
							Mann-Whitney U	14									THC	0.207	0.0171572	0.172132	0.241868									Estimates of Covariance Parametersa											Pairwise Comparisons
							Wilcoxon W	69																						Parameter	Estimate	Std. Error									Dependent Variable:17-b estradiol
							Z	-2.72134																						Residual	27.7455	5.60543									(I) Surgery	(J) Surgery	Mean Difference (I-J)	Std. Error	Sig.a	95% Confidence Interval for Differencea
							Asymp. Sig. (2-tailed)	0.0065017									4. Surgery * Treatment													a. Dependent Variable: E2todos.																Lower Bound	Upper Bound
							Exact Sig. [2*(1-tailed Sig.)]	.005a																																	Endo	Sham	-0.902317	1.74897	0.609254	-4.45666	2.65202
							a. Not corrected for ties. b. Grouping Variable: Nonparametric										Estimates																								Sham	Endo	0.902317	1.74897	0.609254	-2.65202	4.45666
																	Dependent Variable:% of immunoreactive area													Estimated Marginal Means											Based on estimated marginal means
																	Surgery	Treatment	Mean	Std. Error	95% Confidence Interval																				a. Adjustment for multiple comparisons: Bonferroni.
																					Lower Bound	Upper Bound								1. Grand Meana
																	Sham	Vehicle	0.155	0.0228763	0.10851	0.20149								Mean	Std. Error	df	95% Confidence Interval								Univariate Tests
																		THC	0.27	0.0255764	0.218022	0.321978											Lower Bound	Upper Bound							Dependent Variable:17-b estradiol
																	Endo	Vehicle	0.226	0.0228763	0.17951	0.27249								24.9847	1.01944	49	22.9361	27.0334								Sum of Squares	df	Mean Square	F	Sig.
																		THC	0.144	0.0228763	0.0975098	0.19049								a. Dependent Variable: Estrogen levels											Contrast	7.66284	1	7.66284	0.266166	0.609254
																																									Error	978.849	34	28.7897
																	Pairwise Comparisons																								The F tests the effect of Surgery. This test is based on the linearly independent pairwise comparisons among the estimated marginal means.
																	Dependent Variable:% of immunoreactive area													2. Phasetodos
																	Treatment	(I) Surgery	(J) Surgery	Mean Difference (I-J)	Std. Error	Sig.a	95% Confidence Interval for Differencea
																							Lower Bound	Upper Bound						Estimatesa											3. Treatment
																	Vehicle	Sham	Endo	-.071*	0.0323519	0.0351202	-0.136747	-0.00525298						Phasetodos	Mean	Std. Error	df	95% Confidence Interval
																		Endo	Sham	.071*	0.0323519	0.0351202	0.00525298	0.136747										Lower Bound	Upper Bound						Estimates
																	THC	Sham	Endo	.126*	0.0343144	0.000820048	0.0562648	0.195735						Proestrus	30.8164	2.6337	49	25.5238	36.109						Dependent Variable:17-b estradiol
																		Endo	Sham	-.126*	0.0343144	0.000820048	-0.195735	-0.0562648						Estrus	21.4354	1.20842	49	19.0069	23.8638						Treatment	Mean	Std. Error	95% Confidence Interval
																	Based on estimated marginal means													Diestrus	22.7024	0.978131	49	20.7368	24.6681									Lower Bound	Upper Bound
																	*. The mean difference is significant at the .05 level. a. Adjustment for multiple comparisons: Bonferroni.													a. Dependent Variable: Estrogen levels											THC	22.6001	1.27256	20.0139	25.1862
																																									Veh	23.0291	1.19979	20.5909	25.4674
																	Univariate Tests													Pairwise Comparisonsb
																	Dependent Variable:% of immunoreactive area													(I) Phasetodos	(J) Phasetodos	Mean Difference (I-J)	Std. Error	df	Sig.a	95% Confidence Interval for Differencea					Pairwise Comparisons
																	Treatment		Sum of Squares	df	Mean Square	F	Sig.	Partial Eta Squared	Noncent. Parameter	Observed Powera										Lower Bound	Upper Bound				Dependent Variable:17-b estradiol
																	Vehicle	Contrast	0.025205	1	0.025205	4.81633	0.0351202	0.12408	4.81633	0.568465				Proestrus	Estrus	9.381*	2.8977	49	0.00649911	2.19775	16.5643				(I) Treatment	(J) Treatment	Mean Difference (I-J)	Std. Error	Sig.a	95% Confidence Interval for Differencea
																		Error	0.17793	34	0.00523324										Diestrus	8.114*	2.80947	49	0.017266	1.14939	15.0785									Lower Bound	Upper Bound
																	THC	Contrast	0.07056	1	0.07056	13.4831	0.000820048	0.283955	13.4831	0.945908				Estrus	Proestrus	-9.381*	2.8977	49	0.00649911	-16.5643	-2.19775				THC	Veh	-0.42905	1.74897	0.807687	-3.98339	3.12529
																		Error	0.17793	34	0.00523324										Diestrus	-1.26708	1.55468	49	1	-5.12106	2.58689				Veh	THC	0.42905	1.74897	0.807687	-3.12529	3.98339
																	Each F tests the simple effects of Surgery within each level combination of the other effects shown. These tests are based on the linearly independent pairwise comparisons among the estimated marginal means.													Diestrus	Proestrus	-8.114*	2.80947	49	0.017266	-15.0785	-1.14939				Based on estimated marginal means
																	a. Computed using alpha = .05														Estrus	1.26708	1.55468	49	1	-2.58689	5.12106				a. Adjustment for multiple comparisons: Bonferroni.
																														Based on estimated marginal means
																														*. The mean difference is significant at the .05 level. a. Adjustment for multiple comparisons: Bonferroni. b. Dependent Variable: E2todos.											Univariate Tests
																	5. Surgery * Treatment																								Dependent Variable:17-b estradiol
																														Univariate Testsa												Sum of Squares	df	Mean Square	F	Sig.
																	Estimates													Numerator df	Denominator df	F	Sig.								Contrast	1.73255	1	1.73255	0.0601797	0.807687
																	Dependent Variable:% of immunoreactive area													2	49	5.27107	0.00844508								Error	978.849	34	28.7897
																	Surgery	Treatment	Mean	Std. Error	95% Confidence Interval									The F tests the effect of Phasetodos. This test is based on the linearly independent pairwise comparisons among the estimated marginal means.											The F tests the effect of Treatment. This test is based on the linearly independent pairwise comparisons among the estimated marginal means.
																					Lower Bound	Upper Bound								a. Dependent Variable: E2todos.
																	Sham	Vehicle	0.155	0.0228763	0.10851	0.20149
																		THC	0.27	0.0255764	0.218022	0.321978																			4. Surgery * Treatment
																	Endo	Vehicle	0.226	0.0228763	0.17951	0.27249
																		THC	0.144	0.0228763	0.0975098	0.19049																			Estimates
																																									Dependent Variable:17-b estradiol
																	Pairwise Comparisons																								Surgery	Treatment	Mean	Std. Error	95% Confidence Interval
																	Dependent Variable:% of immunoreactive area																												Lower Bound	Upper Bound
																	Surgery	(I) Treatment	(J) Treatment	Mean Difference (I-J)	Std. Error	Sig.a	95% Confidence Interval for Differencea																		Endo	THC	20.1786	1.69675	16.7304	23.6268
																							Lower Bound	Upper Bound																		Veh	24.5483	1.69675	21.1001	27.9965
																	Sham	Vehicle	THC	-.115*	0.0343144	0.00198153	-0.184735	-0.0452648																	Sham	THC	25.0215	1.89703	21.1663	28.8768
																		THC	Vehicle	.115*	0.0343144	0.00198153	0.0452648	0.184735																		Veh	21.51	1.69675	18.0618	24.9582
																	Endo	Vehicle	THC	.082*	0.0323519	0.0160282	0.016253	0.147747
																		THC	Vehicle	-.082*	0.0323519	0.0160282	-0.147747	-0.016253																	Pairwise Comparisons
																	Based on estimated marginal means																								Dependent Variable:17-b estradiol
																	*. The mean difference is significant at the .05 level. a. Adjustment for multiple comparisons: Bonferroni.																								Treatment	(I) Surgery	(J) Surgery	Mean Difference (I-J)	Std. Error	Sig.a	95% Confidence Interval for Differencea
																																															Lower Bound	Upper Bound
																	Univariate Tests																								THC	Endo	Sham	-4.84294	2.54513	0.0655592	-10.0153	0.329382
																	Dependent Variable:% of immunoreactive area																									Sham	Endo	4.84294	2.54513	0.0655592	-0.329382	10.0153
																	Surgery		Sum of Squares	df	Mean Square	F	Sig.	Partial Eta Squared	Noncent. Parameter	Observed Powera															Veh	Endo	Sham	3.03831	2.39957	0.214053	-1.83821	7.91482
																	Sham	Contrast	0.0587778	1	0.0587778	11.2316	0.00198153	0.248314	11.2316	0.902398																Sham	Endo	-3.03831	2.39957	0.214053	-7.91482	1.83821
																		Error	0.17793	34	0.00523324																				Based on estimated marginal means
																	Endo	Contrast	0.03362	1	0.03362	6.42432	0.0160282	0.158922	6.42432	0.692366															a. Adjustment for multiple comparisons: Bonferroni.
																		Error	0.17793	34	0.00523324
																	Each F tests the simple effects of Treatment within each level combination of the other effects shown. These tests are based on the linearly independent pairwise comparisons among the estimated marginal means.																								Univariate Tests
																	a. Computed using alpha = .05																								Dependent Variable:17-b estradiol
																																									Treatment		Sum of Squares	df	Mean Square	F	Sig.
																																									THC	Contrast	104.24	1	104.24	3.62075	0.0655592
																																										Error	978.849	34	28.7897
																																									Veh	Contrast	46.1566	1	46.1566	1.60323	0.214053
																																										Error	978.849	34	28.7897
																																									Each F tests the simple effects of Surgery within each level combination of the other effects shown. These tests are based on the linearly independent pairwise comparisons among the estimated marginal means.
																																									5. Surgery * Treatment
																																									Estimates
																																									Dependent Variable:17-b estradiol
																																									Surgery	Treatment	Mean	Std. Error	95% Confidence Interval
																																													Lower Bound	Upper Bound
																																									Endo	THC	20.1786	1.69675	16.7304	23.6268
																																										Veh	24.5483	1.69675	21.1001	27.9965
																																									Sham	THC	25.0215	1.89703	21.1663	28.8768
																																										Veh	21.51	1.69675	18.0618	24.9582
																																									Pairwise Comparisons
																																									Dependent Variable:17-b estradiol
																																									Surgery	(I) Treatment	(J) Treatment	Mean Difference (I-J)	Std. Error	Sig.a	95% Confidence Interval for Differencea
																																															Lower Bound	Upper Bound
																																									Endo	THC	Veh	-4.36967	2.39957	0.0774133	-9.24619	0.506839
																																										Veh	THC	4.36967	2.39957	0.0774133	-0.506839	9.24619
																																									Sham	THC	Veh	3.51157	2.54513	0.176679	-1.66075	8.6839
																																										Veh	THC	-3.51157	2.54513	0.176679	-8.6839	1.66075
																																									Based on estimated marginal means
																																									a. Adjustment for multiple comparisons: Bonferroni.
																																									Univariate Tests
																																									Dependent Variable:17-b estradiol
																																									Surgery		Sum of Squares	df	Mean Square	F	Sig.
																																									Endo	Contrast	95.4703	1	95.4703	3.31613	0.0774133
																																										Error	978.849	34	28.7897
																																									Sham	Contrast	54.8051	1	54.8051	1.90364	0.176679
																																										Error	978.849	34	28.7897
																																									Each F tests the simple effects of Treatment within each level combination of the other effects shown. These tests are based on the linearly independent pairwise comparisons among the estimated marginal means.
[truncated: 10 more columns]

## Sheet: Figure 4-figure supplement  1
Figure 4-figure supplement 1a: Cyst innervation														Figure 4-figure supplement 1b: Ectopic endometrium
																																					Figure 4-figure supplement 1c: Ovarian follicles
Raw data		% of immunoreactive area												Raw data		Uterus diameter (mm)
		Vehicle	THC													Sham-vehicle	Sham-THC	Endo-vehicle	Endo-THC							Endometrial area (mm2)										Raw data		Number of preantral follicles										Number of antral follicles
		0.13825	0.0745													1.2129	1.18172	2.19032	1.75699							Sham-vehicle	Sham-THC	Endo-vehicle	Endo-THC									Sham-vehicle	Sham-THC	Endo-vehicle	Endo-THC							Sham-vehicle	Sham-THC
		0.0695	0.072													1.32581	1.11075	2.0785	1.21398							0.99	1.11	2.64	1.42									333	936	1224	621							279	369
		0.07975	0.0535													1.30323	2.18172	1.05591	1.34194							0.81	0.71	2.82	0.75									1368	414	684	648							432	315
		0.099	0.031													1.21183	1.08817	1.21613	1.12796							1.06	0.55	0.65	0.94									1575	1188	1521	864							306	252
		0.138	0.071													1.47742	1.2086	1.47312	2.64194							0.91	3.24	0.91	0.68									990	423	1467	1341							333	360
		0.19875	0.052													1.25194	1.22688	2.62903	1.45591							0.81	0.8	1.12	3.85									513	567	1917	1566							270	234
		0.04475	0.0803333													1.32796	1.5043	1.19032	1.57742							1.44	0.69	3.34	1.06									945	612	963	567							324	198
		0.0295	0.03125													2.01828		1.23226	1.03441							1.01	0.72	0.74	1.34									756	1260	612	1035							333	279
		0.0346667	0.0135													1.45484		1.76452	1.4828							0.9	1.39	0.96	0.64									657	900	810	855							333	243
		0.02625																1.22903								2.66		2.08	1.1									855		1242	711							351
	Mean	0.0858417	0.0532315												Mean	1.39824	1.35745	1.60591	1.51481							1		0.78	1.1									1233		1143	1008							252
	SD	0.0574704	0.0234852												SD	0.250908	0.388253	0.53367	0.479362						Mean	1.159	1.15125	1.604	1.288								Mean	922.5	787.5	1158.3	921.6						Mean	321.3	281.25
	SEM	0.0181738	0.0078284												SEM	0.0836361	0.146746	0.168761	0.159787						SD	0.556825	0.886396	1.01426	0.937299								SD	386.389	331.694	407.825	325.668						SD	50.5658	61.5601
	CI	-0.0290992	0.00626106												CI	0.896427	0.580945	0.538574	0.556091						SEM	0.176084	0.313388	0.320736	0.2964								SEM	122.187	117.272	128.965	102.985						SEM	15.9903	21.7648
		0.200783	0.100202													1.90006	2.13396	2.67325	2.47354						CI	0.0453493	-0.621542	-0.424512	-0.586597								CI	149.722	124.111	342.651	270.264						CI	220.168	158.13
																										2.27265	2.92404	3.63251	3.1626									1695.28	1450.89	1973.95	1572.94							422.432	404.37
Statistics														Statistics
															Between-Subjects Factors										Between-Subjects Factors											Statistics	Between-Subjects Factors										Between-Subjects Factors
	Group Statistics																Value Label	N									Value Label	N											Value Label	N									Value Label
		Treatment	N	Mean	Std. Deviation	Std. Error Mean									Surgery	0	Sham	16							Surgery	0	Sham	18									Surgery	0	Sham	18							Surgery	0	Sham
	% of immunoreactive area	Vehicle	10	0.0858417	0.0574704	0.0181738										1	Endo	19								1	Endo	20										1	Endo	20								1	Endo
		THC	9	0.0532315	0.0234852	0.0078284									Treatment	2	Vehicle	19							Treatment	2	Vehicle	20									Treatment	2	Vehicle	20							Treatment	2	Vehicle
																3	THC	16								3	THC	18										3	THC	18								3	THC
	Independent Samples Test
			Levene's Test for Equality of Variances		t-test for Equality of Means										Descriptive Statistics										Descriptive Statistics												Descriptive Statistics										Descriptive Statistics
			F	Sig.	t	df	Sig. (2-tailed)	Mean Difference	Std. Error Difference	95% Confidence Interval of the Difference					Dependent Variable:Uterus diameter										Dependent Variable:Endometrial area												Dependent Variable:Number of preantral follicles										Dependent Variable:Number of antral follicles
										Lower	Upper				Surgery	Treatment	Mean	Std. Deviation	N						Surgery	Treatment	Mean	Std. Deviation	N								Surgery	Treatment	Mean	Std. Deviation	N						Surgery	Treatment	Mean
	% of immunoreactive area	Equal variances assumed	6.18147	0.023602	1.58381	17	0.131663	0.0326102	0.0205897	-0.0108304	0.0760507				Sham	Vehicle	1.39824	0.250908	9						Sham	Vehicle	1.159	0.556825	10								Sham	Vehicle	922.5	386.389	10						Sham	Vehicle	321.3
		Equal variances not assumed			1.64797	12.178	0.1249	0.0326102	0.0197881	-0.0104346	0.075655					THC	1.35745	0.388253	7							THC	1.15125	0.886396	8									THC	787.5	331.694	8							THC	281.25
																Total	1.3804	0.307098	16							Total	1.15556	0.698344	18									Total	862.5	359.314	18							Total	303.5
															Endo	Vehicle	1.60591	0.53367	10						Endo	Vehicle	1.604	1.01426	10								Endo	Vehicle	1158.3	407.825	10						Endo	Vehicle	294.3
																THC	1.51481	0.479362	9							THC	1.288	0.937299	10									THC	921.6	325.668	10							THC	298.8
																Total	1.56276	0.496703	19							Total	1.446	0.964214	20									Total	1039.95	379.165	20							Total	296.55
															Total	Vehicle	1.50754	0.426299	19						Total	Vehicle	1.3815	0.828412	20								Total	Vehicle	1040.4	405.136	20						Total	Vehicle	307.8
																THC	1.44597	0.435144	16							THC	1.22722	0.890795	18									THC	862	325.812	18							THC	291
																Total	1.47939	0.425107	35							Total	1.30842	0.850347	38									Total	955.895	375.776	38							Total	299.842
															Tests of Between-Subjects Effects										Tests of Between-Subjects Effects												Tests of Between-Subjects Effects										Tests of Between-Subjects Effects
															Dependent Variable:Uterus diameter										Dependent Variable:Endometrial area												Dependent Variable:Number of preantral follicles										Dependent Variable:Number of antral follicles
															Source	Type III Sum of Squares	df	Mean Square	F	Sig.	Partial Eta Squared	Noncent. Parameter	Observed Powerb		Source	Type III Sum of Squares	df	Mean Square	F	Sig.	Partial Eta Squared	Noncent. Parameter	Observed Powerb				Source	Type III Sum of Squares	df	Mean Square	F	Sig.	Partial Eta Squared	Noncent. Parameter	Observed Powerb		Source	Type III Sum of Squares	df
															Corrected Model	.335a	3	0.111575	0.595363	0.622792	0.054477	1.78609	0.159023		Corrected Model	1.299a	3	0.432909	0.57822	0.633308	0.0485428	1.73466	0.156777				Corrected Model	659446.579a	3	219816	1.63709	0.199018	0.126217	4.91128	0.390361		Corrected Model	7687.753a	3
															Intercept	74.2504	1	74.2504	396.199	3.23171e-19	0.927434	396.199	1		Intercept	63.6786	1	63.6786	85.053	8.88972e-11	0.714413	85.053	1				Intercept	3.37961e+07	1	3.37961e+07	251.699	2.77712e-17	0.880994	251.699	1		Intercept	3.36372e+06	1
															Surgery	0.286511	1	0.286511	1.52882	0.225576	0.0469989	1.52882	0.223939		Surgery	0.796313	1	0.796313	1.0636	0.309675	0.0303336	1.0636	0.17066				Surgery	321944	1	321944	2.3977	0.130773	0.0658751	2.3977	0.324761		Surgery	210.124	1
															Treatment	0.0374039	1	0.0374039	0.199586	0.658161	0.00639708	0.199586	0.0717486		Treatment	0.246621	1	0.246621	0.329402	0.569789	0.00959534	0.329402	0.0863493				Treatment	325084	1	325084	2.42109	0.128972	0.066475	2.42109	0.327391		Treatment	2973.65	1
															Surgery * Treatment	0.00544135	1	0.00544135	0.0290349	0.865806	0.000935734	0.0290349	0.0531315		Surgery * Treatment	0.223572	1	0.223572	0.298616	0.58832	0.00870636	0.298616	0.0828993				Surgery * Treatment	24336.2	1	24336.2	0.181246	0.672988	0.0053025	0.181246	0.0698395		Surgery * Treatment	4669.89	1
															Error	5.80962	31	0.187407							Error	25.4556	34	0.748693									Error	4.56524e+06	34	134272							Error	237921	34
															Total	82.7456	35								Total	91.809	38										Total	39946608	38								Total	3662010	38
															Corrected Total	6.14434	34								Corrected Total	26.7543	37										Corrected Total	5.22469e+06	37								Corrected Total	245609	37
															a. R Squared = .054 (Adjusted R Squared = -.037) b. Computed using alpha = .05										a. R Squared = .049 (Adjusted R Squared = -.035) b. Computed using alpha = .05												a. R Squared = .126 (Adjusted R Squared = .049) b. Computed using alpha = .05										a. R Squared = .031 (Adjusted R Squared = -.054) b. Computed using alpha = .05
[truncated: 15 more columns]

## Sheet: THC test report
Cannabinoids Test Report						Terpenes Test Report
Parameter	Result % (w/v)	SD (n=2)	Result (mg/ml)	Method		Parameter	Result (mg/ml)	Method
Cannabidiolic Acid (CBDA)	<LOQ	-	<LOQ	FC-PNT-01 (HPLC-UV)		Alpha-Pinene	<LOQ	PI-FC-Terp-022.18.001 (GC-FID)
Cannabigerolic Acid (CBGA)	<LOQ	-	<LOQ	FC-PNT-01 (HPLC-UV)		Camphene	<LOQ	PI-FC-Terp-022.18.001 (GC-FID)
Cannabigerol (CBG)	<LOQ	-	<LOQ	FC-PNT-01 (HPLC-UV)		(-)-Beta-Pinene	<LOQ	PI-FC-Terp-022.18.001 (GC-FID)
Cannabidiol (CBD)	<LOQ	-	<LOQ	FC-PNT-01 (HPLC-UV)		Beta-Myrcene	<LOQ	PI-FC-Terp-022.18.001 (GC-FID)
Tetrahydrocannabivarin (THCV)	<LOQ	-	<LOQ	FC-PNT-01 (HPLC-UV)		Delta-3-Carene	<LOQ	PI-FC-Terp-022.18.001 (GC-FID)
Cannabinol (CBN)	<LOQ	-	<LOQ	FC-PNT-01 (HPLC-UV)		Alpha-Terpinene	<LOQ	PI-FC-Terp-022.18.001 (GC-FID)
Tetrahydrocannabinol (THC)	10.70	0.71	106.97	FC-PNT-01 (HPLC-UV)		p-Cymene	<LOQ	PI-FC-Terp-022.18.001 (GC-FID)
Tetrahydrocannabinolic Acid (THCA)	<LOQ	-	<LOQ	FC-PNT-01 (HPLC-UV)		d-Limonene	<LOQ	PI-FC-Terp-022.18.001 (GC-FID)
Cannabichromene (CBC)	<LOQ	-	<LOQ	FC-PNT-01 (HPLC-UV)		cis-Ocimene	<LOQ	PI-FC-Terp-022.18.001 (GC-FID)
LOQ (limit of quantification)= 0.017% (w/v) = 0.17 mg/ml						Gamma-Terpinene	<LOQ	PI-FC-Terp-022.18.001 (GC-FID)
						trans-Ocimene	<LOQ	PI-FC-Terp-022.18.001 (GC-FID)
						Terpinolene	<LOQ	PI-FC-Terp-022.18.001 (GC-FID)
						Linalool	<LOQ	PI-FC-Terp-022.18.001 (GC-FID)
						(-)-Isopulegol	<LOQ	PI-FC-Terp-022.18.001 (GC-FID)
						Geraniol	<LOQ	PI-FC-Terp-022.18.001 (GC-FID)
						Beta-Caryophyllene	<LOQ	PI-FC-Terp-022.18.001 (GC-FID)
						Alpha-Humulene	<LOQ	PI-FC-Terp-022.18.001 (GC-FID)
						cis-Nerolidol	<LOQ	PI-FC-Terp-022.18.001 (GC-FID)
						trans-Nerolidol	<LOQ	PI-FC-Terp-022.18.001 (GC-FID)
						Caryophyllene Oxide	<LOQ	PI-FC-Terp-022.18.001 (GC-FID)
						(-)-Guaiol	<LOQ	PI-FC-Terp-022.18.001 (GC-FID)
						(-)-Alpha-Bisabolol	<LOQ	PI-FC-Terp-022.18.001 (GC-FID)
						LOQ (limit of quantification) = 0.004 mg/ml
